# Supplementary material
Source: PubMed Central journal article supplement (PMC5120688)
Supplement: NIHMS69887-supplement-Supplementary_Information.pdf [file NIHMS69887-supplement-Supplementary_Information.pdf]

**A multi-center study benchmarks software tools for label-free  
proteome quantification**

**Supplementary Information**

Pedro Navarro, Jörg Kuharev, Ludovic C Gillet, Oliver M. Bernhardt, Brendan MacLean, Hannes L. Röst, Stephen A. Tate, Chih-Chiang Tsou, Lukas Reiter, Ute Distler, George Rosenberger, Yasset Perez-Riverol, Alexey I. Nesvizhskii, Ruedi Aebersold, Stefan Tenzer

# Contents

|                                                                                                                                                              |           |
|--------------------------------------------------------------------------------------------------------------------------------------------------------------|-----------|
| <b>Supplementary Tables</b>                                                                                                                                  | <b>3</b>  |
| 1 Precision and accuracy of relative quantification. . . . .                                                                                                 | 4         |
| 2 Metrics summary . . . . .                                                                                                                                  | 13        |
| 3 Number of identified peptides and proteins . . . . .                                                                                                       | 20        |
| 4 Average $R^2$ regression values of between technical replicates . . . . .                                                                                  | 23        |
| 5 Configuration parameters for all software tools . . . . .                                                                                                  | 26        |
| 6 Analysis of the dynamic ranges on peptide and protein level . . . . .                                                                                      | 33        |
| 7 SWATH isolation windows setups . . . . .                                                                                                                   | 36        |
| 8 Ion Libraries Statistics . . . . .                                                                                                                         | 37        |
| 9 $\log_2$ ratios shift corrections . . . . .                                                                                                                | 39        |
| <b>Supplementary Figures</b>                                                                                                                                 | <b>42</b> |
| 1 Schematic overview of the datasets acquired and analyzed in this study. . .                                                                                | 43        |
| 2 Simulated quantification data. . . . .                                                                                                                     | 44        |
| 3 Signal-to-noise ratios for all datasets. . . . .                                                                                                           | 46        |
| 4 Precursor intensity correlation between technical replicates. . . . .                                                                                      | 47        |
| 5 Coefficients of Variance (CVs) between technical replicates for human proteins and peptides. . . . .                                                       | 48        |
| 6 Precursor intensity correlation between the different datasets. . . . .                                                                                    | 55        |
| 7 LFQbench peptide level benchmarks. . . . .                                                                                                                 | 66        |
| 8 LFQbench protein level benchmarks. . . . .                                                                                                                 | 73        |
| 9 LFQbench protein level benchmarks for single-hit proteins for all instrument/workflow combinations. . . . .                                                | 82        |
| 10 Percentage of false negative human proteins (human proteins detected in only one of the samples) without replication rate filtering. . . . .              | 87        |
| 11 Box-and-whisker plots of $\log_2$ ratio distributions in different intensity tertiles for human proteins. . . . .                                         | 89        |
| 12 Box-and-whisker plots of $\log_2$ ratio distributions in different intensity tertiles for yeast proteins. . . . .                                         | 94        |
| 13 Box-and-whisker plots of $\log_2$ ratio distributions in different intensity tertiles for E.coli proteins. . . . .                                        | 99        |
| 14 LFQbench protein level benchmarks for built-in protein level reports. . . .                                                                               | 104       |
| 15 Retention time differences and correlation of reported peak intensities between all software tools for the first iteration. . . . .                       | 107       |
| 16 Comparative analysis of fragment intensity rankings between DIA-Umpire and the library. . . . .                                                           | 109       |
| 17 Number of incomplete cases. . . . .                                                                                                                       | 110       |
| 18 Percentage of false negative human proteins (human proteins detected in only one of the samples) in the second iteration with replication rate filtering. | 117       |

|                              |                                                                                                                                                                                                      |            |
|------------------------------|------------------------------------------------------------------------------------------------------------------------------------------------------------------------------------------------------|------------|
| 19                           | Number of quantified peptides per protein. . . . .                                                                                                                                                   | 119        |
| 20                           | Peptide overlap between the five software tools using a dedicated library<br>with peptides identified initially only by DIA-Umpire. . . . .                                                          | 126        |
| 21                           | Retention time differences and correlation of reported peak intensities<br>between all software tools for extractions of a dedicated library with peptides<br>identified only by DIA-Umpire. . . . . | 127        |
| 22                           | Overlap of quantified peptides between DIA-Umpire and the library based<br>tools. . . . .                                                                                                            | 129        |
| 23                           | LFQbench peptide and protein level benchmarks using Skyline’s user rec-<br>ommended values. . . . .                                                                                                  | 130        |
| 24                           | Isolation ranges used in Skyline. . . . .                                                                                                                                                            | 132        |
| 25                           | Linear models of intensity scales (CIS). . . . .                                                                                                                                                     | 135        |
| <b>Step-by-Step Analyses</b> |                                                                                                                                                                                                      | <b>140</b> |
| 1                            | OpenSWATH . . . . .                                                                                                                                                                                  | 141        |
| 2                            | SWATH 2.0 . . . . .                                                                                                                                                                                  | 143        |
| 3                            | Skyline . . . . .                                                                                                                                                                                    | 145        |
| 4                            | Spectronaut . . . . .                                                                                                                                                                                | 149        |
| 5                            | DIA-Umpire . . . . .                                                                                                                                                                                 | 153        |

# Supplementary Tables

## Supplementary Table 1. Precision and accuracy of relative quantification.

Precision (standard deviation between technical replicates) and accuracy (absolute median deviation from expected  $\log_2(A/B)$  values) on peptide and protein level for each tertile (1st: lowest intensity (0%-33.3%), 2nd: medium intensity (33.3%-66.7%) and 3rd: highest intensity (66.7%-100%)). The asterisks at the second iteration panel of HYE124 stand for a significant improvement compared to the first iteration.

Precision and accuracy of the different software tools are compared to each other within the same species (color code: worst value in full red and best value in full green).

The following pages show the precision and accuracy of peptides and proteins for:

- Supplementary Table 1.A: sample set HYE124, TTOF5600\_32fix, iteration 1 & 2
- Supplementary Table 1.B: sample set HYE124, TTOF5600\_64var, iteration 1 & 2
- Supplementary Table 1.C: sample set HYE124, TTOF6600\_32fix, iteration 1 & 2
- Supplementary Table 1.D: sample set HYE124, TTOF6600\_64var, iteration 1 & 2
- Supplementary Table 1.E: sample set HYE110, TTOF6600\_32fix
- Supplementary Table 1.F: sample set HYE110, TTOF6600\_32var
- Supplementary Table 1.G: sample set HYE110, TTOF6600\_64fix
- Supplementary Table 1.H: sample set HYE110, TTOF6600\_64fix

Precision of relative quantification

|          | Intensity tertile | Iteration 1 |           |         |             |          | Iteration 2 |           |         |             |          |        |
|----------|-------------------|-------------|-----------|---------|-------------|----------|-------------|-----------|---------|-------------|----------|--------|
|          |                   | OpenSWATH   | SWATH 2.0 | Skyline | Spectronaut | DIAmpire | OpenSWATH   | SWATH 2.0 | Skyline | Spectronaut | DIAmpire |        |
| Peptides | Human             | 1st.        | 0.305     | 0.448   | 0.311       | 0.270    | 0.562       | 0.472     | 0.271*  | 0.363       | 0.307    | 0.508* |
|          |                   | 2nd.        | 0.226     | 0.286   | 0.270       | 0.221    | 0.362       | 0.335     | 0.214*  | 0.312       | 0.233    | 0.367  |
|          |                   | 3rd.        | 0.214     | 0.231   | 0.230       | 0.212    | 0.335       | 0.267     | 0.221*  | 0.248       | 0.197*   | 0.288* |
|          | Yeast             | 1st.        | 0.430     | 0.629   | 0.383       | 0.464    | 0.672       | 0.577     | 0.277*  | 0.464       | 0.496    | 0.664  |
|          |                   | 2nd.        | 0.326     | 0.434   | 0.371       | 0.405    | 0.414       | 0.452     | 0.260*  | 0.429       | 0.387    | 0.358* |
|          |                   | 3rd.        | 0.390     | 0.404   | 0.414       | 0.445    | 0.393       | 0.455     | 0.331*  | 0.582       | 0.429    | 0.405  |
|          | E.Coli            | 1st.        | 0.524     | 0.878   | 0.733       | 0.772    | 0.702       | 0.837     | 0.557*  | 0.893       | 0.796    | 0.696  |
|          |                   | 2nd.        | 0.525     | 0.641   | 0.504       | 0.526    | 0.690       | 0.657     | 0.365*  | 0.558       | 0.557    | 0.430* |
|          |                   | 3rd.        | 0.453     | 0.440   | 0.388       | 0.410    | 0.539       | 0.459     | 0.341*  | 0.459       | 0.392    | 0.401* |
| Proteins | Human             | 1st.        | 0.233     | 0.271   | 0.268       | 0.225    | 0.356       | 0.274     | 0.302   | 0.311       | 0.258    | 0.350  |
|          |                   | 2nd.        | 0.207     | 0.160   | 0.220       | 0.177    | 0.296       | 0.239     | 0.235   | 0.240       | 0.180    | 0.236* |
|          |                   | 3rd.        | 0.137     | 0.180   | 0.128       | 0.159    | 0.216       | 0.142     | 0.208   | 0.150       | 0.141*   | 0.246  |
|          | Yeast             | 1st.        | 0.458     | 0.393   | 0.475       | 0.458    | 0.419       | 0.425     | 0.436   | 0.495       | 0.475    | 0.530  |
|          |                   | 2nd.        | 0.386     | 0.282   | 0.438       | 0.490    | 0.387       | 0.430     | 0.319   | 0.365*      | 0.537    | 0.433  |
|          |                   | 3rd.        | 0.431     | 0.350   | 0.443       | 0.367    | 0.329       | 0.442     | 0.466   | 0.492       | 0.393    | 0.326  |
|          | E.Coli            | 1st.        | 0.701     | 0.632   | 0.795       | 0.956    | 0.657       | 0.842     | 0.576   | 0.863       | 1.042    | 0.539  |
|          |                   | 2nd.        | 0.468     | 0.456   | 0.518       | 0.544    | 0.441       | 0.527     | 0.489   | 0.668       | 0.666    | 0.560  |
|          |                   | 3rd.        | 0.349     | 0.330   | 0.346       | 0.238    | 0.350       | 0.318     | 0.259*  | 0.375       | 0.290    | 0.507  |

Accuracy of relative quantification

|          | Intensity tertile | Iteration 1 |           |         |             |          | Iteration 2 |           |         |             |          |        |
|----------|-------------------|-------------|-----------|---------|-------------|----------|-------------|-----------|---------|-------------|----------|--------|
|          |                   | OpenSWATH   | SWATH 2.0 | Skyline | Spectronaut | DIAmpire | OpenSWATH   | SWATH 2.0 | Skyline | Spectronaut | DIAmpire |        |
| Peptides | Human             | 1st.        | 0.014     | 0.030   | 0.025       | 0.011    | 0.068       | 0.061     | 0.018   | 0.021       | 0.014    | 0.062  |
|          |                   | 2nd.        | 0.006     | 0.006   | 0.007       | 0.013    | 0.006       | 0.014     | 0.003   | 0.024*      | 0.012    | 0.013  |
|          |                   | 3rd.        | 0.005     | 0.010   | 0.012       | 0.003    | 0.033       | 0.017*    | 0.009   | 0.004       | 0.000    | 0.026  |
|          | Yeast             | 1st.        | 0.386     | 0.007   | 0.232       | 0.278    | 0.002       | 0.002     | 0.088*  | 0.074       | 0.055    | 0.115* |
|          |                   | 2nd.        | 0.442     | 0.129   | 0.251       | 0.342    | 0.100       | 0.111     | 0.104   | 0.116       | 0.199    | 0.167* |
|          |                   | 3rd.        | 0.266     | 0.111   | 0.142       | 0.190    | 0.164       | 0.076     | 0.100   | 0.111       | 0.125    | 0.198* |
|          | E.Coli            | 1st.        | 0.936     | 0.535   | 0.832       | 0.800    | 0.492       | 0.367*    | 0.326*  | 0.487*      | 0.359*   | 0.603  |
|          |                   | 2nd.        | 0.802     | 0.302   | 0.510       | 0.634    | 0.310       | 0.185*    | 0.266   | 0.200*      | 0.357*   | 0.393  |
|          |                   | 3rd.        | 0.480     | 0.252   | 0.284       | 0.399    | 0.315       | 0.149*    | 0.237   | 0.271*      | 0.263*   | 0.360  |
| Proteins | Human             | 1st.        | 0.008     | 0.021   | 0.006       | 0.007    | 0.036       | 0.008     | 0.022   | 0.011       | 0.007    | 0.011  |
|          |                   | 2nd.        | 0.012     | 0.012   | 0.005       | 0.013    | 0.008       | 0.007     | 0.003   | 0.030       | 0.010    | 0.014  |
|          |                   | 3rd.        | 0.006     | 0.003   | 0.001       | 0.006    | 0.009       | 0.000     | 0.003   | 0.021       | 0.012    | 0.010  |
|          | Yeast             | 1st.        | 0.329     | 0.070   | 0.159       | 0.258    | 0.006       | 0.010     | 0.013   | 0.051       | 0.074    | 0.052  |
|          |                   | 2nd.        | 0.376     | 0.171   | 0.196       | 0.326    | 0.010       | 0.107     | 0.094   | 0.091       | 0.209    | 0.030  |
|          |                   | 3rd.        | 0.221     | 0.123   | 0.123       | 0.162    | 0.066       | 0.072     | 0.111   | 0.113       | 0.096    | 0.138  |
|          | E.Coli            | 1st.        | 0.919     | 0.649   | 0.785       | 0.716    | 0.141       | 0.393*    | 0.107*  | 0.456*      | 0.365*   | 0.232  |
|          |                   | 2nd.        | 0.713     | 0.489   | 0.338       | 0.527    | 0.058       | 0.203*    | 0.201*  | 0.195*      | 0.342*   | 0.197  |
|          |                   | 3rd.        | 0.478     | 0.286   | 0.300       | 0.369    | 0.164       | 0.184*    | 0.209*  | 0.322       | 0.254*   | 0.106  |

Supplementary Table 1.A: Precision and accuracy in HYE124, TTOF5600\_32fix.

Precision of relative quantification

|          | Intensity tertile | Iteration 1 |           |         |             |          | Iteration 2 |           |         |             |          |         |
|----------|-------------------|-------------|-----------|---------|-------------|----------|-------------|-----------|---------|-------------|----------|---------|
|          |                   | OpenSWATH   | SWATH 2.0 | Skyline | Spectronaut | DIAmpire | OpenSWATH   | SWATH 2.0 | Skyline | Spectronaut | DIAmpire |         |
| Peptides | Human             | 1st.        | 0.306     | 0.472   | 0.320       | 0.301    | 0.587       | 0.437     | 0.272 * | 0.414       | 0.362    | 0.522 * |
|          |                   | 2nd.        | 0.218     | 0.266   | 0.256       | 0.212    | 0.401       | 0.301     | 0.214 * | 0.289       | 0.230    | 0.366 * |
|          |                   | 3rd.        | 0.232     | 0.273   | 0.249       | 0.180    | 0.293       | 0.243     | 0.176 * | 0.248       | 0.192    | 0.271 * |
|          | Yeast             | 1st.        | 0.367     | 0.710   | 0.414       | 0.455    | 0.774       | 0.543     | 0.319 * | 0.524       | 0.492    | 0.575 * |
|          |                   | 2nd.        | 0.304     | 0.445   | 0.381       | 0.382    | 0.462       | 0.442     | 0.266 * | 0.464       | 0.348 *  | 0.361 * |
|          |                   | 3rd.        | 0.326     | 0.477   | 0.422       | 0.395    | 0.373       | 0.382     | 0.296 * | 0.573       | 0.377 *  | 0.293 * |
|          | E.Coli            | 1st.        | 0.549     | 0.953   | 0.763       | 0.720    | 0.825       | 0.770     | 0.624 * | 0.819       | 0.708    | 0.712 * |
|          |                   | 2nd.        | 0.452     | 0.737   | 0.523       | 0.429    | 0.716       | 0.534     | 0.319 * | 0.498       | 0.496    | 0.539 * |
|          |                   | 3rd.        | 0.372     | 0.457   | 0.349       | 0.301    | 0.582       | 0.390     | 0.287 * | 0.352       | 0.331    | 0.393 * |
| Proteins | Human             | 1st.        | 0.159     | 0.192   | 0.229       | 0.182    | 0.440       | 0.218     | 0.212   | 0.246       | 0.210    | 0.431   |
|          |                   | 2nd.        | 0.155     | 0.166   | 0.163       | 0.134    | 0.280       | 0.182     | 0.173   | 0.233       | 0.123 *  | 0.284   |
|          |                   | 3rd.        | 0.125     | 0.101   | 0.125       | 0.103    | 0.209       | 0.136     | 0.125   | 0.141       | 0.121    | 0.211   |
|          | Yeast             | 1st.        | 0.309     | 0.378   | 0.432       | 0.367    | 0.591       | 0.372     | 0.429   | 0.456       | 0.382    | 0.474 * |
|          |                   | 2nd.        | 0.271     | 0.298   | 0.353       | 0.346    | 0.458       | 0.267     | 0.321   | 0.416       | 0.336    | 0.367 * |
|          |                   | 3rd.        | 0.244     | 0.355   | 0.379       | 0.307    | 0.261       | 0.253     | 0.272 * | 0.434       | 0.375    | 0.272   |
|          | E.Coli            | 1st.        | 0.548     | 0.625   | 0.634       | 0.602    | 0.742       | 0.528     | 0.570   | 0.701       | 0.655    | 0.613   |
|          |                   | 2nd.        | 0.318     | 0.605   | 0.553       | 0.445    | 0.610       | 0.433     | 0.419 * | 0.599       | 0.600    | 0.527   |
|          |                   | 3rd.        | 0.292     | 0.347   | 0.287       | 0.206    | 0.378       | 0.255     | 0.246 * | 0.326       | 0.196    | 0.338   |

Accuracy of relative quantification

|          | Intensity tertile | Iteration 1 |           |         |             |          | Iteration 2 |           |         |             |          |         |
|----------|-------------------|-------------|-----------|---------|-------------|----------|-------------|-----------|---------|-------------|----------|---------|
|          |                   | OpenSWATH   | SWATH 2.0 | Skyline | Spectronaut | DIAmpire | OpenSWATH   | SWATH 2.0 | Skyline | Spectronaut | DIAmpire |         |
| Peptides | Human             | 1st.        | 0.005     | 0.010   | 0.010       | 0.026    | 0.063       | 0.021     | 0.005   | 0.054       | 0.030    | 0.045   |
|          |                   | 2nd.        | 0.004     | 0.002   | 0.008       | 0.005    | 0.009       | 0.010     | 0.000   | 0.018       | 0.004    | 0.011   |
|          |                   | 3rd.        | 0.001     | 0.003   | 0.000       | 0.009    | 0.026       | 0.003     | 0.002   | 0.033 *     | 0.009    | 0.025   |
|          | Yeast             | 1st.        | 0.305     | 0.068   | 0.230       | 0.185    | 0.088       | 0.012     | 0.104 * | 0.114       | 0.069    | 0.205 * |
|          |                   | 2nd.        | 0.325     | 0.096   | 0.253       | 0.220    | 0.187       | 0.070     | 0.095   | 0.068       | 0.060    | 0.198   |
|          |                   | 3rd.        | 0.173     | 0.086   | 0.130       | 0.163    | 0.194       | 0.056     | 0.075   | 0.071       | 0.082    | 0.225 * |
|          | E.Coli            | 1st.        | 0.765     | 0.427   | 0.857       | 0.646    | 0.607       | 0.320 *   | 0.326   | 0.721 *     | 0.209 *  | 0.625   |
|          |                   | 2nd.        | 0.635     | 0.159   | 0.493       | 0.444    | 0.413       | 0.124 *   | 0.240   | 0.193 *     | 0.166 *  | 0.415   |
|          |                   | 3rd.        | 0.362     | 0.214   | 0.286       | 0.331    | 0.391       | 0.135 *   | 0.225   | 0.082 *     | 0.189 *  | 0.443   |
| Proteins | Human             | 1st.        | 0.004     | 0.007   | 0.003       | 0.016    | 0.043       | 0.012     | 0.013   | 0.077       | 0.007    | 0.016   |
|          |                   | 2nd.        | 0.009     | 0.011   | 0.004       | 0.001    | 0.004       | 0.003     | 0.014   | 0.005       | 0.002    | 0.010   |
|          |                   | 3rd.        | 0.010     | 0.002   | 0.001       | 0.006    | 0.023       | 0.007     | 0.002   | 0.038 *     | 0.002    | 0.014   |
|          | Yeast             | 1st.        | 0.297     | 0.068   | 0.185       | 0.211    | 0.085       | 0.049     | 0.049   | 0.029       | 0.003    | 0.019   |
|          |                   | 2nd.        | 0.312     | 0.142   | 0.219       | 0.202    | 0.088       | 0.097     | 0.059   | 0.038       | 0.073    | 0.048   |
|          |                   | 3rd.        | 0.146     | 0.090   | 0.115       | 0.139    | 0.130       | 0.059     | 0.082   | 0.098       | 0.082    | 0.123   |
|          | E.Coli            | 1st.        | 0.712     | 0.563   | 0.782       | 0.557    | 0.336       | 0.280 *   | 0.246 * | 0.517 *     | 0.191 *  | 0.300   |
|          |                   | 2nd.        | 0.527     | 0.367   | 0.460       | 0.380    | 0.203       | 0.118 *   | 0.161 * | 0.154 *     | 0.178 *  | 0.227   |
|          |                   | 3rd.        | 0.344     | 0.246   | 0.285       | 0.307    | 0.231       | 0.161 *   | 0.206 * | 0.117 *     | 0.201 *  | 0.239   |

Supplementary Table 1.B: Precision and accuracy in HYE124, TTOF5600\_64var.

Precision of relative quantification

|          | Intensity tertile | Iteration 1 |           |         |             |          | Iteration 2 |           |         |             |          |        |
|----------|-------------------|-------------|-----------|---------|-------------|----------|-------------|-----------|---------|-------------|----------|--------|
|          |                   | OpenSWATH   | SWATH 2.0 | Skyline | Spectronaut | DIAmpire | OpenSWATH   | SWATH 2.0 | Skyline | Spectronaut | DIAmpire |        |
| Peptides | Human             | 1st.        | 0.338     | 1.180   | 0.316       | 0.307    | 0.666       | 0.511     | 0.325*  | 0.403       | 0.377    | 0.583* |
|          |                   | 2nd.        | 0.279     | 0.388   | 0.288       | 0.268    | 0.449       | 0.329     | 0.274*  | 0.316       | 0.294    | 0.400* |
|          |                   | 3rd.        | 0.280     | 0.286   | 0.255       | 0.231    | 0.347       | 0.294     | 0.230*  | 0.271       | 0.220*   | 0.339  |
|          | Yeast             | 1st.        | 0.439     | 0.903   | 0.373       | 0.458    | 0.765       | 0.631     | 0.300*  | 0.462       | 0.492    | 0.691* |
|          |                   | 2nd.        | 0.344     | 0.629   | 0.376       | 0.436    | 0.492       | 0.481     | 0.274*  | 0.425       | 0.400*   | 0.419* |
|          |                   | 3rd.        | 0.438     | 0.527   | 0.462       | 0.556    | 0.383       | 0.447     | 0.318*  | 0.536       | 0.450*   | 0.375  |
| E.Coli   | 1st.              | 0.652       | 1.309     | 0.822   | 0.878       | 0.941    | 0.961       | 0.600*    | 0.807   | 0.803*      | 0.894    |        |
|          | 2nd.              | 0.629       | 0.702     | 0.632   | 0.636       | 0.688    | 0.801       | 0.384*    | 0.644   | 0.624       | 0.447*   |        |
|          | 3rd.              | 0.529       | 0.445     | 0.446   | 0.441       | 0.491    | 0.515       | 0.303*    | 0.405*  | 0.414*      | 0.393*   |        |
| Proteins | Human             | 1st.        | 0.189     | 0.457   | 0.223       | 0.176    | 0.400       | 0.225     | 0.263*  | 0.246       | 0.243    | 0.421  |
|          |                   | 2nd.        | 0.180     | 0.189   | 0.168       | 0.153    | 0.293       | 0.191     | 0.189   | 0.213       | 0.156    | 0.294  |
|          |                   | 3rd.        | 0.136     | 0.153   | 0.160       | 0.131    | 0.239       | 0.142     | 0.148   | 0.122*      | 0.143    | 0.243  |
|          | Yeast             | 1st.        | 0.392     | 0.451   | 0.536       | 0.456    | 0.667       | 0.470     | 0.442   | 0.459*      | 0.507    | 0.557* |
|          |                   | 2nd.        | 0.332     | 0.400   | 0.394       | 0.477    | 0.446       | 0.455     | 0.338*  | 0.407       | 0.424*   | 0.418  |
|          |                   | 3rd.        | 0.394     | 0.444   | 0.474       | 0.490    | 0.289       | 0.362     | 0.413   | 0.482       | 0.475    | 0.341  |
| E.Coli   | 1st.              | 0.732       | 0.657     | 0.805   | 0.839       | 0.782    | 0.916       | 0.753     | 0.772   | 0.902       | 0.711    |        |
|          | 2nd.              | 0.528       | 0.480     | 0.590   | 0.598       | 0.707    | 0.594       | 0.411     | 0.681   | 0.670       | 0.661    |        |
|          | 3rd.              | 0.325       | 0.307     | 0.277   | 0.407       | 0.591    | 0.349       | 0.249*    | 0.284   | 0.392       | 0.584    |        |

Accuracy of relative quantification

|          | Intensity tertile | Iteration 1 |           |         |             |          | Iteration 2 |           |         |             |          |        |
|----------|-------------------|-------------|-----------|---------|-------------|----------|-------------|-----------|---------|-------------|----------|--------|
|          |                   | OpenSWATH   | SWATH 2.0 | Skyline | Spectronaut | DIAmpire | OpenSWATH   | SWATH 2.0 | Skyline | Spectronaut | DIAmpire |        |
| Peptides | Human             | 1st.        | 0.007     | 0.074   | 0.001       | 0.018    | 0.059       | 0.012     | 0.003*  | 0.031       | 0.028    | 0.052  |
|          |                   | 2nd.        | 0.010     | 0.020   | 0.002       | 0.001    | 0.012       | 0.008     | 0.003   | 0.000       | 0.001    | 0.015  |
|          |                   | 3rd.        | 0.008     | 0.010   | 0.001       | 0.007    | 0.022       | 0.000*    | 0.003   | 0.012*      | 0.012*   | 0.019  |
|          | Yeast             | 1st.        | 0.324     | 0.058   | 0.129       | 0.202    | 0.078       | 0.049     | 0.003*  | 0.003       | 0.001    | 0.015* |
|          |                   | 2nd.        | 0.354     | 0.064   | 0.154       | 0.238    | 0.024       | 0.040     | 0.023   | 0.074       | 0.140    | 0.056* |
|          |                   | 3rd.        | 0.177     | 0.028   | 0.038       | 0.116    | 0.058       | 0.008     | 0.023   | 0.066*      | 0.081    | 0.049  |
| E.Coli   | 1st.              | 0.856       | 0.438     | 0.651   | 0.835       | 0.283    | 0.274*      | 0.196*    | 0.474*  | 0.408*      | 0.258    |        |
|          | 2nd.              | 0.711       | 0.181     | 0.383   | 0.537       | 0.141    | 0.143*      | 0.121*    | 0.267*  | 0.346*      | 0.186    |        |
|          | 3rd.              | 0.328       | 0.085     | 0.133   | 0.246       | 0.109    | 0.022*      | 0.057*    | 0.131   | 0.150*      | 0.105    |        |
| Proteins | Human             | 1st.        | 0.014     | 0.001   | 0.001       | 0.006    | 0.045       | 0.018     | 0.000   | 0.021       | 0.011    | 0.017  |
|          |                   | 2nd.        | 0.007     | 0.005   | 0.006       | 0.001    | 0.009       | 0.003     | 0.010   | 0.005       | 0.001    | 0.005  |
|          |                   | 3rd.        | 0.013     | 0.006   | 0.006       | 0.002    | 0.015       | 0.004     | 0.004   | 0.001       | 0.006    | 0.000  |
|          | Yeast             | 1st.        | 0.291     | 0.052   | 0.059       | 0.202    | 0.221       | 0.001     | 0.206   | 0.024       | 0.046    | 0.282  |
|          |                   | 2nd.        | 0.317     | 0.108   | 0.103       | 0.240    | 0.143       | 0.078     | 0.070   | 0.093       | 0.174    | 0.158  |
|          |                   | 3rd.        | 0.114     | 0.012   | 0.013       | 0.065    | 0.030       | 0.030     | 0.041   | 0.046*      | 0.043    | 0.050  |
| E.Coli   | 1st.              | 0.779       | 0.505     | 0.616   | 0.749       | 0.045    | 0.355*      | 0.027*    | 0.431*  | 0.312*      | 0.174    |        |
|          | 2nd.              | 0.619       | 0.414     | 0.296   | 0.448       | 0.234    | 0.136*      | 0.040*    | 0.294   | 0.260*      | 0.302    |        |
|          | 3rd.              | 0.338       | 0.164     | 0.124   | 0.217       | 0.089    | 0.071*      | 0.016*    | 0.176   | 0.127*      | 0.143    |        |

Supplementary Table 1.C: Precision and accuracy in HYE124, TTOF6600\_32fix.



Precision of relative quantification

|          | Intensity tertile | Iteration 1 |           |         |             |          | Iteration 2 |           |         |             |          |         |
|----------|-------------------|-------------|-----------|---------|-------------|----------|-------------|-----------|---------|-------------|----------|---------|
|          |                   | OpenSWATH   | SWATH 2.0 | Skyline | Spectronaut | DIAmpire | OpenSWATH   | SWATH 2.0 | Skyline | Spectronaut | DIAmpire |         |
| Peptides | Human             | 1st.        | 0.329     | 0.411   | 0.318       | 0.309    | 0.690       | 0.427     | 0.299 * | 0.380       | 0.405    | 0.589 * |
|          |                   | 2nd.        | 0.248     | 0.307   | 0.255       | 0.246    | 0.470       | 0.293     | 0.245 * | 0.260       | 0.262    | 0.430 * |
|          |                   | 3rd.        | 0.245     | 0.259   | 0.257       | 0.210    | 0.397       | 0.282     | 0.233 * | 0.259       | 0.206    | 0.349 * |
|          | Yeast             | 1st.        | 0.395     | 0.576   | 0.376       | 0.496    | 0.865       | 0.537     | 0.295 * | 0.458       | 0.502    | 0.708 * |
|          |                   | 2nd.        | 0.317     | 0.356   | 0.393       | 0.393    | 0.499       | 0.398     | 0.275 * | 0.395       | 0.385    | 0.447 * |
|          |                   | 3rd.        | 0.347     | 0.439   | 0.474       | 0.478    | 0.518       | 0.370     | 0.306 * | 0.401 *     | 0.403 *  | 0.456 * |
|          | E.Coli            | 1st.        | 0.582     | 0.847   | 0.760       | 0.848    | 1.137       | 0.789     | 0.607 * | 0.750       | 0.784 *  | 1.045 * |
|          |                   | 2nd.        | 0.493     | 0.632   | 0.580       | 0.540    | 0.837       | 0.601     | 0.323 * | 0.529 *     | 0.551    | 0.559 * |
|          |                   | 3rd.        | 0.419     | 0.451   | 0.423       | 0.363    | 0.546       | 0.418     | 0.335 * | 0.380 *     | 0.349 *  | 0.375 * |
| Proteins | Human             | 1st.        | 0.166     | 0.167   | 0.185       | 0.147    | 0.414       | 0.186     | 0.192   | 0.171 *     | 0.164    | 0.431   |
|          |                   | 2nd.        | 0.162     | 0.144   | 0.159       | 0.107    | 0.328       | 0.156     | 0.148   | 0.140 *     | 0.113    | 0.327   |
|          |                   | 3rd.        | 0.169     | 0.129   | 0.160       | 0.106    | 0.273       | 0.149 *   | 0.130   | 0.148 *     | 0.116    | 0.274   |
|          | Yeast             | 1st.        | 0.289     | 0.306   | 0.361       | 0.333    | 0.597       | 0.319     | 0.343   | 0.322 *     | 0.358    | 0.560   |
|          |                   | 2nd.        | 0.273     | 0.266   | 0.362       | 0.361    | 0.333       | 0.319     | 0.350   | 0.295 *     | 0.309 *  | 0.361   |
|          |                   | 3rd.        | 0.303     | 0.429   | 0.397       | 0.361    | 0.627       | 0.349     | 0.309 * | 0.406       | 0.320 *  | 0.483 * |
|          | E.Coli            | 1st.        | 0.443     | 0.652   | 0.619       | 0.755    | 0.914       | 0.615     | 0.600   | 0.658       | 0.734    | 0.728 * |
|          |                   | 2nd.        | 0.397     | 0.438   | 0.555       | 0.508    | 0.736       | 0.445     | 0.465   | 0.490 *     | 0.487    | 0.554 * |
|          |                   | 3rd.        | 0.344     | 0.464   | 0.393       | 0.325    | 0.368       | 0.312     | 0.314 * | 0.329       | 0.311    | 0.483   |

Accuracy of relative quantification

|          | Intensity tertile | Iteration 1 |           |         |             |          | Iteration 2 |           |         |             |          |         |
|----------|-------------------|-------------|-----------|---------|-------------|----------|-------------|-----------|---------|-------------|----------|---------|
|          |                   | OpenSWATH   | SWATH 2.0 | Skyline | Spectronaut | DIAmpire | OpenSWATH   | SWATH 2.0 | Skyline | Spectronaut | DIAmpire |         |
| Peptides | Human             | 1st.        | 0.016     | 0.011   | 0.010       | 0.018    | 0.046       | 0.012     | 0.007   | 0.018 *     | 0.028    | 0.043   |
|          |                   | 2nd.        | 0.000     | 0.002   | 0.003       | 0.001    | 0.010       | 0.001     | 0.003   | 0.005       | 0.001    | 0.008   |
|          |                   | 3rd.        | 0.009     | 0.006   | 0.008       | 0.010    | 0.015       | 0.005     | 0.005   | 0.011       | 0.011    | 0.014   |
|          | Yeast             | 1st.        | 0.264     | 0.036   | 0.184       | 0.171    | 0.067       | 0.020     | 0.029 * | 0.041       | 0.046    | 0.010 * |
|          |                   | 2nd.        | 0.244     | 0.018   | 0.130       | 0.136    | 0.054       | 0.021     | 0.000   | 0.052       | 0.011    | 0.066 * |
|          |                   | 3rd.        | 0.039     | 0.035   | 0.005       | 0.048    | 0.061       | 0.065     | 0.048   | 0.021       | 0.004    | 0.063   |
|          | E.Coli            | 1st.        | 0.776     | 0.354   | 0.839       | 0.752    | 0.230       | 0.296 *   | 0.244 * | 0.445 *     | 0.317 *  | 0.263   |
|          |                   | 2nd.        | 0.561     | 0.110   | 0.423       | 0.353    | 0.164       | 0.041 *   | 0.099   | 0.167 *     | 0.117 *  | 0.187   |
|          |                   | 3rd.        | 0.135     | 0.023   | 0.074       | 0.132    | 0.153       | 0.047 *   | 0.002 * | 0.054 *     | 0.043 *  | 0.162   |
| Proteins | Human             | 1st.        | 0.014     | 0.016   | 0.020       | 0.010    | 0.002       | 0.017     | 0.010   | 0.022       | 0.010    | 0.016   |
|          |                   | 2nd.        | 0.000     | 0.001   | 0.000       | 0.002    | 0.005       | 0.005     | 0.002   | 0.004       | 0.000    | 0.003   |
|          |                   | 3rd.        | 0.009     | 0.006   | 0.008       | 0.006    | 0.006       | 0.008     | 0.005   | 0.009       | 0.006    | 0.003   |
|          | Yeast             | 1st.        | 0.312     | 0.044   | 0.162       | 0.163    | 0.145       | 0.037     | 0.056   | 0.077       | 0.004    | 0.126   |
|          |                   | 2nd.        | 0.201     | 0.029   | 0.119       | 0.114    | 0.047       | 0.002     | 0.043   | 0.041       | 0.027    | 0.072   |
|          |                   | 3rd.        | 0.008     | 0.041   | 0.028       | 0.022    | 0.013       | 0.058     | 0.058   | 0.028       | 0.002    | 0.038   |
|          | E.Coli            | 1st.        | 0.675     | 0.487   | 0.736       | 0.616    | 0.046       | 0.233 *   | 0.107 * | 0.394 *     | 0.133 *  | 0.142   |
|          |                   | 2nd.        | 0.498     | 0.271   | 0.463       | 0.334    | 0.048       | 0.095 *   | 0.059 * | 0.182 *     | 0.120 *  | 0.115   |
|          |                   | 3rd.        | 0.128     | 0.044   | 0.076       | 0.109    | 0.057       | 0.015 *   | 0.025 * | 0.075       | 0.031 *  | 0.051   |

Supplementary Table 1.D: Precision and accuracy in HYE124, TTOF6600\_64var.

### Precision of relative quantification

|          |        | Intensity tertile | OpenSWATH | SWATH 2.0 | Skyline | Spectronaut | DIAmpire |
|----------|--------|-------------------|-----------|-----------|---------|-------------|----------|
| Peptides | Human  | 1st.              | 0.553     | 0.354     | 0.598   | 0.444       | 0.579    |
|          |        | 2nd.              | 0.427     | 0.324     | 0.444   | 0.340       | 0.444    |
|          |        | 3rd.              | 0.404     | 0.297     | 0.399   | 0.331       | 0.407    |
|          | Yeast  | 1st.              | 1.027     | 0.821     | 1.046   | 0.937       | 1.240    |
|          |        | 2nd.              | 1.149     | 1.125     | 1.461   | 1.197       | 0.996    |
|          |        | 3rd.              | 1.776     | 1.592     | 2.206   | 1.793       | 1.396    |
|          | E.Coli | 1st.              | 1.219     | 1.172     | 1.675   | 1.339       | 1.273    |
|          |        | 2nd.              | 0.774     | 0.690     | 0.841   | 0.689       | 0.569    |
|          |        | 3rd.              | 0.611     | 0.479     | 0.638   | 0.551       | 0.656    |
| Proteins | Human  | 1st.              | 0.313     | 0.321     | 0.423   | 0.293       | 0.501    |
|          |        | 2nd.              | 0.287     | 0.300     | 0.318   | 0.226       | 0.393    |
|          |        | 3rd.              | 0.256     | 0.207     | 0.240   | 0.242       | 0.353    |
|          | Yeast  | 1st.              | 0.812     | 0.644     | 0.939   | 0.906       | 0.783    |
|          |        | 2nd.              | 1.239     | 0.946     | 1.208   | 1.186       | 1.238    |
|          |        | 3rd.              | 1.786     | 1.399     | 1.775   | 1.538       | 1.050    |
|          | E.Coli | 1st.              | 1.069     | 0.922     | 1.433   | 1.194       | 1.129    |
|          |        | 2nd.              | 0.506     | 0.468     | 0.712   | 0.692       | 0.633    |
|          |        | 3rd.              | 0.421     | 0.413     | 0.343   | 0.387       | 0.695    |

### Accuracy of relative quantification

|          |        | Intensity tertile | OpenSWATH | SWATH 2.0 | Skyline | Spectronaut | DIAmpire |
|----------|--------|-------------------|-----------|-----------|---------|-------------|----------|
| Peptides | Human  | 1st.              | 0.065     | 0.045     | 0.047   | 0.041       | 0.056    |
|          |        | 2nd.              | 0.009     | 0.005     | 0.040   | 0.014       | 0.000    |
|          |        | 3rd.              | 0.033     | 0.035     | 0.007   | 0.011       | 0.051    |
|          | Yeast  | 1st.              | 0.000     | 0.177     | 0.043   | 0.252       | 0.435    |
|          |        | 2nd.              | 0.007     | 0.067     | 0.027   | 0.347       | 0.201    |
|          |        | 3rd.              | 0.238     | 0.227     | 0.135   | 0.029       | 0.179    |
|          | E.Coli | 1st.              | 0.697     | 0.527     | 0.750   | 0.815       | 0.642    |
|          |        | 2nd.              | 0.089     | 0.124     | 0.035   | 0.376       | 0.177    |
|          |        | 3rd.              | 0.216     | 0.234     | 0.167   | 0.004       | 0.064    |
| Proteins | Human  | 1st.              | 0.001     | 0.028     | 0.023   | 0.009       | 0.055    |
|          |        | 2nd.              | 0.001     | 0.019     | 0.045   | 0.008       | 0.002    |
|          |        | 3rd.              | 0.002     | 0.003     | 0.031   | 0.000       | 0.036    |
|          | Yeast  | 1st.              | 0.096     | 0.393     | 0.000   | 0.189       | 0.829    |
|          |        | 2nd.              | 0.053     | 0.082     | 0.034   | 0.301       | 0.479    |
|          |        | 3rd.              | 0.179     | 0.034     | 0.442   | 0.073       | 0.069    |
|          | E.Coli | 1st.              | 0.427     | 0.149     | 0.604   | 0.608       | 0.174    |
|          |        | 2nd.              | 0.003     | 0.216     | 0.124   | 0.317       | 0.627    |
|          |        | 3rd.              | 0.284     | 0.312     | 0.198   | 0.086       | 0.619    |

Supplementary Table 1.E: Precision and accuracy in HYE110, TTOF6600\_32fix.

### Precision of relative quantification

|          |        | Intensity tertile | OpenSWATH | SWATH 2.0 | Skyline | Spectronaut | DIAmpire |
|----------|--------|-------------------|-----------|-----------|---------|-------------|----------|
| Peptides | Human  | 1st.              | 0.533     | 0.360     | 0.493   | 0.448       | 0.545    |
|          |        | 2nd.              | 0.407     | 0.313     | 0.393   | 0.369       | 0.439    |
|          |        | 3rd.              | 0.378     | 0.331     | 0.432   | 0.340       | 0.408    |
|          | Yeast  | 1st.              | 0.854     | 0.856     | 1.048   | 0.874       | 1.379    |
|          |        | 2nd.              | 1.174     | 1.195     | 1.108   | 1.125       | 1.134    |
|          |        | 3rd.              | 1.610     | 1.733     | 1.933   | 1.821       | 1.474    |
|          | E.Coli | 1st.              | 1.065     | 1.150     | 1.567   | 1.319       | 1.414    |
|          |        | 2nd.              | 0.711     | 0.640     | 0.809   | 0.643       | 0.661    |
|          |        | 3rd.              | 0.616     | 0.454     | 0.588   | 0.586       | 0.972    |
| Proteins | Human  | 1st.              | 0.285     | 0.286     | 0.315   | 0.285       | 0.486    |
|          |        | 2nd.              | 0.235     | 0.252     | 0.224   | 0.202       | 0.389    |
|          |        | 3rd.              | 0.250     | 0.280     | 0.389   | 0.289       | 0.373    |
|          | Yeast  | 1st.              | 0.652     | 0.708     | 0.854   | 0.847       | 0.855    |
|          |        | 2nd.              | 0.983     | 0.617     | 0.988   | 1.103       | 1.081    |
|          |        | 3rd.              | 1.514     | 1.649     | 1.677   | 1.613       | 0.986    |
|          | E.Coli | 1st.              | 0.906     | 0.623     | 1.489   | 1.074       | 0.936    |
|          |        | 2nd.              | 0.409     | 0.560     | 0.739   | 0.695       | 0.511    |
|          |        | 3rd.              | 0.478     | 0.332     | 0.524   | 0.374       | 0.914    |

### Accuracy of relative quantification

|          |        | Intensity tertile | OpenSWATH | SWATH 2.0 | Skyline | Spectronaut | DIAmpire |
|----------|--------|-------------------|-----------|-----------|---------|-------------|----------|
| Peptides | Human  | 1st.              | 0.065     | 0.034     | 0.036   | 0.047       | 0.057    |
|          |        | 2nd.              | 0.010     | 0.004     | 0.010   | 0.006       | 0.005    |
|          |        | 3rd.              | 0.025     | 0.021     | 0.009   | 0.022       | 0.037    |
|          | Yeast  | 1st.              | 0.055     | 0.132     | 0.082   | 0.137       | 0.420    |
|          |        | 2nd.              | 0.068     | 0.076     | 0.121   | 0.221       | 0.180    |
|          |        | 3rd.              | 0.143     | 0.208     | 0.191   | 0.060       | 0.129    |
|          | E.Coli | 1st.              | 0.568     | 0.489     | 0.578   | 0.644       | 0.642    |
|          |        | 2nd.              | 0.133     | 0.120     | 0.129   | 0.246       | 0.221    |
|          |        | 3rd.              | 0.192     | 0.154     | 0.150   | 0.064       | 0.026    |
| Proteins | Human  | 1st.              | 0.023     | 0.017     | 0.010   | 0.018       | 0.082    |
|          |        | 2nd.              | 0.001     | 0.010     | 0.016   | 0.001       | 0.040    |
|          |        | 3rd.              | 0.010     | 0.005     | 0.019   | 0.009       | 0.011    |
|          | Yeast  | 1st.              | 0.001     | 0.008     | 0.162   | 0.100       | 0.584    |
|          |        | 2nd.              | 0.131     | 0.265     | 0.069   | 0.269       | 0.196    |
|          |        | 3rd.              | 0.043     | 0.609     | 0.024   | 0.126       | 0.212    |
|          | E.Coli | 1st.              | 0.401     | 0.149     | 0.227   | 0.410       | 0.093    |
|          |        | 2nd.              | 0.072     | 0.040     | 0.127   | 0.204       | 0.416    |
|          |        | 3rd.              | 0.246     | 0.254     | 0.101   | 0.124       | 0.386    |

Supplementary Table 1.F: Precision and accuracy in HYE110, TTOF6600\_32var.

### Precision of relative quantification

|          |        | Intensity tertile | OpenSWATH | SWATH 2.0 | Skyline | Spectronaut | DIAmpire |
|----------|--------|-------------------|-----------|-----------|---------|-------------|----------|
| Peptides | Human  | 1st.              | 0.493     | 0.356     | 0.561   | 0.636       | 0.545    |
|          |        | 2nd.              | 0.385     | 0.320     | 0.445   | 0.430       | 0.443    |
|          |        | 3rd.              | 0.376     | 0.335     | 0.413   | 0.396       | 0.446    |
|          | Yeast  | 1st.              | 0.791     | 0.814     | 1.175   | 1.141       | 1.201    |
|          |        | 2nd.              | 0.961     | 1.206     | 1.397   | 1.583       | 0.787    |
|          |        | 3rd.              | 1.602     | 1.671     | 2.144   | 2.250       | 1.254    |
|          | E.Coli | 1st.              | 1.025     | 1.116     | 1.553   | 1.752       | 0.929    |
|          |        | 2nd.              | 0.551     | 0.585     | 0.850   | 0.669       | 0.643    |
|          |        | 3rd.              | 0.565     | 0.498     | 0.637   | 0.579       | 0.612    |
| Proteins | Human  | 1st.              | 0.277     | 0.250     | 0.343   | 0.373       | 0.448    |
|          |        | 2nd.              | 0.266     | 0.259     | 0.332   | 0.273       | 0.390    |
|          |        | 3rd.              | 0.205     | 0.199     | 0.257   | 0.302       | 0.454    |
|          | Yeast  | 1st.              | 0.612     | 0.742     | 0.997   | 1.120       | 0.838    |
|          |        | 2nd.              | 1.065     | 0.714     | 1.273   | 1.455       | 0.663    |
|          |        | 3rd.              | 1.502     | 1.472     | 1.786   | 2.176       | 1.091    |
|          | E.Coli | 1st.              | 1.004     | 0.800     | 1.428   | 1.498       | 0.910    |
|          |        | 2nd.              | 0.483     | 0.442     | 0.904   | 0.505       | 0.621    |
|          |        | 3rd.              | 0.445     | 0.413     | 0.361   | 0.318       | 0.728    |

### Accuracy of relative quantification

|          |        | Intensity tertile | OpenSWATH | SWATH 2.0 | Skyline | Spectronaut | DIAmpire |
|----------|--------|-------------------|-----------|-----------|---------|-------------|----------|
| Peptides | Human  | 1st.              | 0.062     | 0.047     | 0.091   | 0.224       | 0.086    |
|          |        | 2nd.              | 0.001     | 0.006     | 0.004   | 0.013       | 0.002    |
|          |        | 3rd.              | 0.038     | 0.042     | 0.041   | 0.101       | 0.057    |
|          | Yeast  | 1st.              | 0.110     | 0.225     | 0.019   | 0.500       | 0.447    |
|          |        | 2nd.              | 0.010     | 0.022     | 0.317   | 0.123       | 0.336    |
|          |        | 3rd.              | 0.151     | 0.154     | 0.138   | 0.126       | 0.280    |
|          | E.Coli | 1st.              | 0.579     | 0.556     | 0.675   | 0.415       | 0.904    |
|          |        | 2nd.              | 0.114     | 0.230     | 0.303   | 0.148       | 0.380    |
|          |        | 3rd.              | 0.208     | 0.174     | 0.419   | 0.334       | 0.124    |
| Proteins | Human  | 1st.              | 0.026     | 0.022     | 0.059   | 0.110       | 0.069    |
|          |        | 2nd.              | 0.001     | 0.012     | 0.001   | 0.011       | 0.004    |
|          |        | 3rd.              | 0.017     | 0.021     | 0.024   | 0.041       | 0.056    |
|          | Yeast  | 1st.              | 0.003     | 0.015     | 0.342   | 0.183       | 0.354    |
|          |        | 2nd.              | 0.028     | 0.132     | 0.206   | 0.133       | 0.289    |
|          |        | 3rd.              | 0.017     | 0.145     | 1.123   | 0.064       | 0.079    |
|          | E.Coli | 1st.              | 0.230     | 0.157     | 0.116   | 0.393       | 0.116    |
|          |        | 2nd.              | 0.002     | 0.038     | 0.362   | 0.142       | 0.246    |
|          |        | 3rd.              | 0.286     | 0.268     | 0.386   | 0.327       | 0.511    |

Supplementary Table 1.G: Precision and accuracy in HYE110, TTOF6600\_64fix.

## Precision of relative quantification

|          |        | Intensity tertile | OpenSWATH | SWATH 2.0 | Skyline | Spectronaut | DIAmpire |
|----------|--------|-------------------|-----------|-----------|---------|-------------|----------|
| Peptides | Human  | 1st.              | 0.480     | 0.369     | 0.536   | 0.578       | 0.556    |
|          |        | 2nd.              | 0.371     | 0.289     | 0.397   | 0.396       | 0.418    |
|          |        | 3rd.              | 0.316     | 0.300     | 0.373   | 0.293       | 0.376    |
|          | Yeast  | 1st.              | 0.723     | 0.868     | 1.066   | 1.005       | 1.127    |
|          |        | 2nd.              | 0.684     | 1.000     | 1.220   | 1.307       | 0.961    |
|          |        | 3rd.              | 1.200     | 1.605     | 2.060   | 1.926       | 1.304    |
|          | E.Coli | 1st.              | 0.890     | 1.209     | 1.468   | 1.733       | 1.241    |
|          |        | 2nd.              | 0.607     | 0.462     | 0.809   | 0.732       | 0.608    |
|          |        | 3rd.              | 0.468     | 0.426     | 0.554   | 0.498       | 0.619    |
| Proteins | Human  | 1st.              | 0.246     | 0.229     | 0.309   | 0.278       | 0.490    |
|          |        | 2nd.              | 0.249     | 0.197     | 0.209   | 0.216       | 0.373    |
|          |        | 3rd.              | 0.258     | 0.270     | 0.223   | 0.204       | 0.330    |
|          | Yeast  | 1st.              | 0.482     | 0.780     | 0.770   | 0.761       | 0.813    |
|          |        | 2nd.              | 0.671     | 0.744     | 1.019   | 1.124       | 0.599    |
|          |        | 3rd.              | 1.126     | 1.087     | 1.847   | 1.923       | 1.361    |
|          | E.Coli | 1st.              | 0.738     | 1.249     | 1.266   | 1.226       | 0.991    |
|          |        | 2nd.              | 0.443     | 0.414     | 0.993   | 0.558       | 0.727    |
|          |        | 3rd.              | 0.333     | 0.375     | 0.500   | 0.346       | 0.621    |

## Accuracy of relative quantification

|          |        | Intensity tertile | OpenSWATH | SWATH 2.0 | Skyline | Spectronaut | DIAmpire |
|----------|--------|-------------------|-----------|-----------|---------|-------------|----------|
| Peptides | Human  | 1st.              | 0.027     | 0.014     | 0.026   | 0.066       | 0.038    |
|          |        | 2nd.              | 0.005     | 0.001     | 0.016   | 0.011       | 0.002    |
|          |        | 3rd.              | 0.010     | 0.010     | 0.005   | 0.018       | 0.027    |
|          | Yeast  | 1st.              | 0.063     | 0.273     | 0.013   | 0.554       | 0.339    |
|          |        | 2nd.              | 0.013     | 0.017     | 0.247   | 0.248       | 0.253    |
|          |        | 3rd.              | 0.256     | 0.227     | 0.248   | 0.229       | 0.227    |
|          | E.Coli | 1st.              | 0.443     | 0.509     | 0.532   | 0.098       | 0.702    |
|          |        | 2nd.              | 0.083     | 0.173     | 0.300   | 0.217       | 0.380    |
|          |        | 3rd.              | 0.163     | 0.095     | 0.266   | 0.193       | 0.161    |
| Proteins | Human  | 1st.              | 0.002     | 0.002     | 0.008   | 0.001       | 0.040    |
|          |        | 2nd.              | 0.013     | 0.003     | 0.002   | 0.005       | 0.007    |
|          |        | 3rd.              | 0.007     | 0.005     | 0.008   | 0.001       | 0.030    |
|          | Yeast  | 1st.              | 0.049     | 0.014     | 0.376   | 0.397       | 0.344    |
|          |        | 2nd.              | 0.041     | 0.089     | 0.195   | 0.039       | 0.451    |
|          |        | 3rd.              | 0.323     | 0.282     | 0.076   | 0.250       | 0.064    |
|          | E.Coli | 1st.              | 0.294     | 0.291     | 0.153   | 0.085       | 0.086    |
|          |        | 2nd.              | 0.039     | 0.041     | 0.286   | 0.092       | 0.189    |
|          |        | 3rd.              | 0.207     | 0.207     | 0.216   | 0.205       | 0.521    |

Supplementary Table 1.H: Precision and accuracy in HYE110, TTOF6600\_64var.

## Supplementary Table 2. Metrics summary

Number of protein and peptide identifications, number of valid quantification ratios, and calculated raw and AUQC values for separation between (yeast vs. human) and (E.coli vs. human). AUQC values are also displayed as the arctangent hyperbolic (arctanh) for an easier interpretation of the values. The arctanh reflects that the difficulty of improving the AUQC value is not linear. AUQC values of the different software tools were compared to each other (color code: worst value in full red and best value in full green).

The following pages show the metrics summary for:

- Supplementary Table 2.A: sample set HYE124, TTOF5600\_32fix, iteration 1 & 2
- Supplementary Table 2.B: sample set HYE124, TTOF5600\_64var, iteration 1 & 2
- Supplementary Table 2.C: sample set HYE124, TTOF6600\_32fix, iteration 1 & 2
- Supplementary Table 2.D: sample set HYE124, TTOF6600\_64var, iteration 1 & 2
- Supplementary Table 2.E: sample set HYE110, TTOF6600\_32fix
- Supplementary Table 2.F: sample set HYE110, TTOF6600\_32var
- Supplementary Table 2.G: sample set HYE110, TTOF6600\_64fix
- Supplementary Table 2.H: sample set HYE110, TTOF6600\_64fix

### Iteration 1

|          |                       | Median CV<br>of Human | Identifications | Valid<br>quantification<br>ratios | Overlap<br>Yeast-Human | Overlap E.coli-<br>Human | Overlap Yeast-<br>Human<br>(arctanh) | Overlap E.coli-<br>Human<br>(arctanh) |
|----------|-----------------------|-----------------------|-----------------|-----------------------------------|------------------------|--------------------------|--------------------------------------|---------------------------------------|
| peptides | OpenSWATH             | 5%                    | 26,225          | 19,611                            | 0.94                   | 0.96                     | 1.73                                 | 1.97                                  |
|          | SWATH2.0              | 6%                    | 17,988          | 17,988                            | 0.94                   | 0.96                     | 1.76                                 | 1.95                                  |
|          | Skyline               | 7%                    | 25,090          | 16,502                            | 0.94                   | 0.95                     | 1.74                                 | 1.82                                  |
|          | Spectronaut           | 6%                    | 30,361          | 21,037                            | 0.94                   | 0.95                     | 1.72                                 | 1.82                                  |
|          | DIA-Umpire            | 10%                   | 12,584          | 10,668                            | 0.95                   | 0.99                     | 1.79                                 | 2.58                                  |
| proteins | OpenSWATH             | 4%                    | 3,296           | 2,764                             | 0.92                   | 0.95                     | 1.58                                 | 1.82                                  |
|          | SWATH2.0              | 4%                    | 2,671           | 2,671                             | 0.96                   | 0.98                     | 1.94                                 | 2.29                                  |
|          | SWATH2.0 (built-in)   | 5%                    | 4,213           | 4,213                             | 0.93                   | 0.95                     | 1.66                                 | 1.80                                  |
|          | Skyline               | 6%                    | 2,872           | 2,359                             | 0.95                   | 0.96                     | 1.82                                 | 1.91                                  |
|          | Spectronaut           | 4%                    | 3,379           | 2,829                             | 0.94                   | 0.95                     | 1.78                                 | 1.79                                  |
|          | DIA-Umpire            | 9%                    | 1,668           | 1,495                             | 0.97                   | 1.00                     | 2.11                                 | 3.34                                  |
|          | DIA-Umpire (built-in) | 12%                   | 2,244           | 2,079                             | 0.95                   | 0.99                     | 1.86                                 | 2.59                                  |

### Iteration 2

|          |                       | Median CV<br>of Human | Identifications | Valid<br>quantification<br>ratios | Overlap<br>Yeast-Human | Overlap E.coli-<br>Human | Overlap Yeast-<br>Human<br>(arctanh) | Overlap E.coli-<br>Human<br>(arctanh) |
|----------|-----------------------|-----------------------|-----------------|-----------------------------------|------------------------|--------------------------|--------------------------------------|---------------------------------------|
| peptides | OpenSWATH             | 9%                    | 26,767          | 20,029                            | 0.93                   | 0.96                     | 1.70                                 | 1.97                                  |
|          | SWATH2.0              | 4%                    | 17,962          | 10,997                            | 0.98                   | 0.98                     | 2.21                                 | 2.35                                  |
|          | Skyline               | 7%                    | 26,341          | 17,116                            | 0.95                   | 0.96                     | 1.80                                 | 1.89                                  |
|          | Spectronaut           | 6%                    | 30,052          | 20,497                            | 0.96                   | 0.97                     | 1.92                                 | 2.06                                  |
|          | DIA-Umpire            | 10%                   | 12,598          | 8,978                             | 0.94                   | 0.99                     | 1.70                                 | 2.57                                  |
| proteins | OpenSWATH             | 6%                    | 3,339           | 2,817                             | 0.95                   | 0.96                     | 1.78                                 | 2.01                                  |
|          | SWATH2.0              | 5%                    | 2,125           | 1,680                             | 0.97                   | 0.99                     | 2.18                                 | 2.93                                  |
|          | SWATH2.0 (built-in)   |                       |                 |                                   |                        |                          |                                      |                                       |
|          | Skyline               | 6%                    | 2,878           | 2,399                             | 0.95                   | 0.97                     | 1.83                                 | 2.07                                  |
|          | Spectronaut           | 4%                    | 3,332           | 2,748                             | 0.95                   | 0.96                     | 1.84                                 | 1.95                                  |
|          | DIA-Umpire            | 10%                   | 1,566           | 1,264                             | 0.98                   | 1.00                     | 2.26                                 | 4.26                                  |
|          | DIA-Umpire (built-in) |                       |                 |                                   |                        |                          |                                      |                                       |

Supplementary Table 2.A: Metrics summary in HYE124, TTOF5600\_32fix.

### Iteration 1

|          |                       | Median CV<br>of Human | Identifications | Valid<br>quantification<br>ratios | Overlap<br>Yeast-Human | Overlap E.coli-<br>Human | Overlap Yeast-<br>Human<br>(arctanh) | Overlap E.coli-<br>Human<br>(arctanh) |
|----------|-----------------------|-----------------------|-----------------|-----------------------------------|------------------------|--------------------------|--------------------------------------|---------------------------------------|
| peptides | OpenSWATH             | 5%                    | 34,154          | 26,992                            | 0.96                   | 0.98                     | 1.96                                 | 2.31                                  |
|          | SWATH2.0              | 6%                    | 27,750          | 27,750                            | 0.95                   | 0.96                     | 1.83                                 | 1.96                                  |
|          | Skyline               | 7%                    | 35,508          | 26,267                            | 0.94                   | 0.95                     | 1.72                                 | 1.81                                  |
|          | Spectronaut           | 7%                    | 34,335          | 25,012                            | 0.95                   | 0.97                     | 1.87                                 | 2.03                                  |
|          | DIA-Umpire            | 11%                   | 15,346          | 12,499                            | 0.93                   | 0.97                     | 1.65                                 | 2.09                                  |
| proteins | OpenSWATH             | 4%                    | 4,056           | 3,518                             | 0.98                   | 0.98                     | 2.27                                 | 2.35                                  |
|          | SWATH2.0              | 4%                    | 3,651           | 3,651                             | 0.98                   | 0.98                     | 2.20                                 | 2.32                                  |
|          | SWATH2.0 (built-in)   | 5%                    | 5,448           | 5,448                             | 0.95                   | 0.95                     | 1.86                                 | 1.88                                  |
|          | Skyline               | 5%                    | 3,931           | 3,420                             | 0.96                   | 0.96                     | 1.96                                 | 2.00                                  |
|          | Spectronaut           | 4%                    | 3,751           | 3,209                             | 0.96                   | 0.98                     | 1.99                                 | 2.38                                  |
|          | DIA-Umpire            | 10%                   | 1,880           | 1,643                             | 0.96                   | 0.98                     | 2.01                                 | 2.43                                  |
|          | DIA-Umpire (built-in) | 12%                   | 2,588           | 2,357                             | 0.94                   | 0.97                     | 1.72                                 | 2.12                                  |

### Iteration 2

|          |                       | Median CV<br>of Human | Identifications | Valid<br>quantification<br>ratios | Overlap<br>Yeast-Human | Overlap E.coli-<br>Human | Overlap Yeast-<br>Human<br>(arctanh) | Overlap E.coli-<br>Human<br>(arctanh) |
|----------|-----------------------|-----------------------|-----------------|-----------------------------------|------------------------|--------------------------|--------------------------------------|---------------------------------------|
| peptides | OpenSWATH             | 8%                    | 34,476          | 27,290                            | 0.95                   | 0.98                     | 1.88                                 | 2.25                                  |
|          | SWATH2.0              | 5%                    | 27,701          | 18,444                            | 0.98                   | 0.98                     | 2.33                                 | 2.33                                  |
|          | Skyline               | 9%                    | 34,206          | 24,455                            | 0.94                   | 0.97                     | 1.72                                 | 2.03                                  |
|          | Spectronaut           | 7%                    | 33,598          | 24,038                            | 0.97                   | 0.98                     | 2.07                                 | 2.25                                  |
|          | DIA-Umpire            | 10%                   | 15,235          | 10,656                            | 0.94                   | 0.98                     | 1.76                                 | 2.35                                  |
| proteins | OpenSWATH             | 5%                    | 4,086           | 3,545                             | 0.98                   | 0.99                     | 2.38                                 | 2.62                                  |
|          | SWATH2.0              | 4%                    | 3,119           | 2,593                             | 0.98                   | 0.98                     | 2.20                                 | 2.39                                  |
|          | SWATH2.0 (built-in)   |                       |                 |                                   |                        |                          |                                      |                                       |
|          | Skyline               | 6%                    | 3,629           | 3,148                             | 0.96                   | 0.97                     | 1.94                                 | 2.06                                  |
|          | Spectronaut           | 4%                    | 3,669           | 3,120                             | 0.97                   | 0.98                     | 2.12                                 | 2.32                                  |
|          | DIA-Umpire            | 10%                   | 1,781           | 1,445                             | 0.97                   | 0.99                     | 2.11                                 | 2.73                                  |
|          | DIA-Umpire (built-in) |                       |                 |                                   |                        |                          |                                      |                                       |

Supplementary Table 2.B: Metrics summary in HYE124, TTOF5600\_64var.



|          |                       | Iteration 1        |                 |                             |                     |                      |                               |                                |
|----------|-----------------------|--------------------|-----------------|-----------------------------|---------------------|----------------------|-------------------------------|--------------------------------|
|          |                       | Median CV of Human | Identifications | Valid quantification ratios | Overlap Yeast-Human | Overlap E.coli-Human | Overlap Yeast-Human (arctanh) | Overlap E.coli-Human (arctanh) |
| peptides | OpenSWATH             | 8%                 | 34,851          | 28,392                      | 0.95                | 0.96                 | 1.79                          | 1.94                           |
|          | SWATH2.0              | 9%                 | 23,904          | 23,904                      | 0.87                | 0.93                 | 1.33                          | 1.67                           |
|          | Skyline               | 8%                 | 32,042          | 23,201                      | 0.95                | 0.95                 | 1.88                          | 1.79                           |
|          | Spectronaut           | 5%                 | 38,974          | 31,250                      | 0.94                | 0.94                 | 1.71                          | 1.73                           |
|          | DIA-Umpire            | 14%                | 25,042          | 20,013                      | 0.95                | 0.98                 | 1.81                          | 2.19                           |
| proteins | OpenSWATH             | 7%                 | 4,030           | 3,617                       | 0.95                | 0.97                 | 1.87                          | 2.03                           |
|          | SWATH2.0              | 7%                 | 3,269           | 3,269                       | 0.95                | 0.98                 | 1.82                          | 2.44                           |
|          | SWATH2.0 (built-in)   | 8%                 | 4,959           | 4,959                       | 0.91                | 0.95                 | 1.54                          | 1.81                           |
|          | Skyline               | 8%                 | 3,582           | 3,044                       | 0.96                | 0.97                 | 1.96                          | 2.07                           |
|          | Spectronaut           | 3%                 | 4,293           | 3,799                       | 0.95                | 0.95                 | 1.78                          | 1.85                           |
|          | DIA-Umpire            | 12%                | 2,852           | 2,517                       | 0.97                | 0.99                 | 2.15                          | 2.72                           |
|          | DIA-Umpire (built-in) | 13%                | 3,643           | 3,344                       | 0.96                | 0.98                 | 1.91                          | 2.40                           |

|          |                       | Iteration 2        |                 |                             |                     |                      |                               |                                |
|----------|-----------------------|--------------------|-----------------|-----------------------------|---------------------|----------------------|-------------------------------|--------------------------------|
|          |                       | Median CV of Human | Identifications | Valid quantification ratios | Overlap Yeast-Human | Overlap E.coli-Human | Overlap Yeast-Human (arctanh) | Overlap E.coli-Human (arctanh) |
| peptides | OpenSWATH             | 10%                | 35,110          | 28,548                      | 0.95                | 0.96                 | 1.79                          | 1.99                           |
|          | SWATH2.0              | 7%                 | 23,883          | 14,020                      | 0.98                | 0.99                 | 2.36                          | 2.47                           |
|          | Skyline               | 10%                | 37,299          | 29,036                      | 0.95                | 0.96                 | 1.86                          | 1.96                           |
|          | Spectronaut           | 5%                 | 38,443          | 29,934                      | 0.95                | 0.97                 | 1.88                          | 2.10                           |
|          | DIA-Umpire            | 13%                | 24,872          | 17,404                      | 0.95                | 0.98                 | 1.88                          | 2.33                           |
| proteins | OpenSWATH             | 8%                 | 4,035           | 3,624                       | 0.96                | 0.97                 | 1.99                          | 2.11                           |
|          | SWATH2.0              | 8%                 | 2,656           | 2,141                       | 0.98                | 0.99                 | 2.34                          | 2.51                           |
|          | SWATH2.0 (built-in)   |                    |                 |                             |                     |                      |                               |                                |
|          | Skyline               | 9%                 | 4,046           | 3,613                       | 0.96                | 0.96                 | 1.91                          | 2.00                           |
|          | Spectronaut           | 3%                 | 4,226           | 3,704                       | 0.95                | 0.97                 | 1.86                          | 2.05                           |
|          | DIA-Umpire            | 12%                | 2,729           | 2,250                       | 0.98                | 1.00                 | 2.35                          | 3.72                           |
|          | DIA-Umpire (built-in) |                    |                 |                             |                     |                      |                               |                                |

Supplementary Table 2.C: Metrics summary in HYE124, TTOF6600\_32fix.

### Iteration 1

|          |                       | Median CV<br>of Human | Identifications | Valid<br>quantification<br>ratios | Overlap<br>Yeast-Human | Overlap E.coli-<br>Human | Overlap Yeast-<br>Human<br>(arctanh) | Overlap E.coli-<br>Human<br>(arctanh) |
|----------|-----------------------|-----------------------|-----------------|-----------------------------------|------------------------|--------------------------|--------------------------------------|---------------------------------------|
| peptides | OpenSWATH             | 6%                    | 40,726          | 36,098                            | 0.97                   | 0.98                     | 2.12                                 | 2.24                                  |
|          | SWATH2.0              | 7%                    | 35,517          | 35,517                            | 0.97                   | 0.97                     | 2.14                                 | 2.11                                  |
|          | Skyline               | 7%                    | 40,804          | 34,103                            | 0.96                   | 0.95                     | 1.91                                 | 1.85                                  |
|          | Spectronaut           | 6%                    | 42,439          | 37,120                            | 0.96                   | 0.96                     | 1.97                                 | 1.90                                  |
|          | DIA-Umpire            | 13%                   | 36,332          | 28,785                            | 0.94                   | 0.96                     | 1.74                                 | 1.98                                  |
| proteins | OpenSWATH             | 5%                    | 4,632           | 4,343                             | 0.98                   | 0.99                     | 2.30                                 | 2.56                                  |
|          | SWATH2.0              | 6%                    | 4,323           | 4,323                             | 0.98                   | 0.98                     | 2.37                                 | 2.36                                  |
|          | SWATH2.0 (built-in)   | 6%                    | 6,178           | 6,178                             | 0.98                   | 0.97                     | 2.23                                 | 2.03                                  |
|          | Skyline               | 6%                    | 4,518           | 4,140                             | 0.97                   | 0.97                     | 2.03                                 | 2.15                                  |
|          | Spectronaut           | 3%                    | 4,692           | 4,346                             | 0.97                   | 0.97                     | 2.13                                 | 2.18                                  |
|          | DIA-Umpire            | 12%                   | 3,795           | 3,379                             | 0.97                   | 0.98                     | 2.12                                 | 2.30                                  |
|          | DIA-Umpire (built-in) | 13%                   | 4,849           | 4,489                             | 0.95                   | 0.96                     | 1.78                                 | 1.94                                  |

### Iteration 2

|          |                       | Median CV<br>of Human | Identifications | Valid<br>quantification<br>ratios | Overlap<br>Yeast-Human | Overlap E.coli-<br>Human | Overlap Yeast-<br>Human<br>(arctanh) | Overlap E.coli-<br>Human<br>(arctanh) |
|----------|-----------------------|-----------------------|-----------------|-----------------------------------|------------------------|--------------------------|--------------------------------------|---------------------------------------|
| peptides | OpenSWATH             | 8%                    | 40,728          | 35,944                            | 0.97                   | 0.98                     | 2.10                                 | 2.26                                  |
|          | SWATH2.0              | 6%                    | 35,489          | 26,303                            | 0.99                   | 0.99                     | 2.49                                 | 2.52                                  |
|          | Skyline               | 7%                    | 42,517          | 37,977                            | 0.97                   | 0.97                     | 2.13                                 | 2.14                                  |
|          | Spectronaut           | 6%                    | 42,325          | 36,292                            | 0.97                   | 0.98                     | 2.11                                 | 2.26                                  |
|          | DIA-Umpire            | 13%                   | 36,249          | 25,677                            | 0.95                   | 0.97                     | 1.82                                 | 2.18                                  |
| proteins | OpenSWATH             | 6%                    | 4,636           | 4,352                             | 0.99                   | 0.99                     | 2.51                                 | 2.60                                  |
|          | SWATH2.0              | 6%                    | 3,946           | 3,371                             | 0.98                   | 0.99                     | 2.42                                 | 2.56                                  |
|          | SWATH2.0 (built-in)   |                       |                 |                                   |                        |                          |                                      |                                       |
|          | Skyline               | 5%                    | 4,692           | 4,456                             | 0.98                   | 0.98                     | 2.37                                 | 2.43                                  |
|          | Spectronaut           | 3%                    | 4,675           | 4,300                             | 0.98                   | 0.99                     | 2.31                                 | 2.50                                  |
|          | DIA-Umpire            | 12%                   | 3,673           | 3,111                             | 0.97                   | 0.99                     | 2.13                                 | 2.85                                  |
|          | DIA-Umpire (built-in) |                       |                 |                                   |                        |                          |                                      |                                       |

Supplementary Table 2.D: Metrics summary in HYE124, TTOF6600\_64var.

|          |             | Median CV<br>of Human | Identifications | Valid<br>quantification<br>ratios | Overlap<br>Yeast-Human | Overlap E.coli-<br>Human | Overlap Yeast-<br>Human<br>(arctanh) | Overlap E.coli-<br>Human<br>(arctanh) |
|----------|-------------|-----------------------|-----------------|-----------------------------------|------------------------|--------------------------|--------------------------------------|---------------------------------------|
| peptides | OpenSWATH   | 15%                   | 30,848          | 16,788                            | 0.94                   | 0.98                     | 1.77                                 | 2.21                                  |
|          | SWATH2.0    | 13%                   | 20,742          | 9,685                             | 0.95                   | 0.98                     | 1.79                                 | 2.21                                  |
|          | Skyline     | 17%                   | 27,236          | 13,430                            | 0.91                   | 0.95                     | 1.51                                 | 1.78                                  |
|          | Spectronaut | 7%                    | 35,576          | 18,858                            | 0.93                   | 0.97                     | 1.65                                 | 2.04                                  |
|          | DIA-Umpire  | 15%                   | 25,209          | 11,836                            | 0.95                   | 0.97                     | 1.88                                 | 2.15                                  |
| proteins | OpenSWATH   | 13%                   | 3,700           | 2,382                             | 0.94                   | 0.99                     | 1.74                                 | 2.72                                  |
|          | SWATH2.0    | 13%                   | 2,421           | 1,431                             | 0.97                   | 0.99                     | 2.13                                 | 2.87                                  |
|          | Skyline     | 16%                   | 2,878           | 1,886                             | 0.93                   | 0.96                     | 1.68                                 | 1.98                                  |
|          | Spectronaut | 5%                    | 3,955           | 2,512                             | 0.94                   | 0.98                     | 1.75                                 | 2.21                                  |
|          | DIA-Umpire  | 16%                   | 2,696           | 1,602                             | 0.99                   | 0.99                     | 2.47                                 | 2.63                                  |

Supplementary Table 2.E: Metrics summary in HYE110, TTOF6600\_32fix.

|          |             | Median CV<br>of Human | Identifications | Valid<br>quantification<br>ratios | Overlap<br>Yeast-Human | Overlap E.coli-<br>Human | Overlap Yeast-<br>Human<br>(arctanh) | Overlap E.coli-<br>Human<br>(arctanh) |
|----------|-------------|-----------------------|-----------------|-----------------------------------|------------------------|--------------------------|--------------------------------------|---------------------------------------|
| peptides | OpenSWATH   | 9%                    | 33,462          | 18,848                            | 0.96                   | 0.99                     | 1.89                                 | 2.46                                  |
|          | SWATH2.0    | 5%                    | 24,151          | 11,706                            | 0.94                   | 0.98                     | 1.74                                 | 2.21                                  |
|          | Skyline     | 8%                    | 31,761          | 16,933                            | 0.94                   | 0.96                     | 1.76                                 | 1.98                                  |
|          | Spectronaut | 6%                    | 36,771          | 19,796                            | 0.94                   | 0.97                     | 1.74                                 | 2.10                                  |
|          | DIA-Umpire  | 11%                   | 28,221          | 13,534                            | 0.94                   | 0.98                     | 1.77                                 | 2.20                                  |
| proteins | OpenSWATH   | 6%                    | 3,988           | 2,585                             | 0.98                   | 0.99                     | 2.21                                 | 2.75                                  |
|          | SWATH2.0    | 5%                    | 2,840           | 1,721                             | 0.95                   | 1.00                     | 1.80                                 | 4.85                                  |
|          | Skyline     | 6%                    | 3,461           | 2,321                             | 0.96                   | 0.98                     | 1.92                                 | 2.24                                  |
|          | Spectronaut | 4%                    | 4,100           | 2,636                             | 0.95                   | 0.98                     | 1.88                                 | 2.28                                  |
|          | DIA-Umpire  | 11%                   | 3,032           | 1,844                             | 0.98                   | 1.00                     | 2.40                                 | 3.18                                  |

Supplementary Table 2.F: Metrics summary in HYE110, TTOF6600\_32var.

|          |             | Median CV<br>of Human | Identifications | Valid<br>quantification<br>ratios | Overlap<br>Yeast-Human | Overlap E.coli-<br>Human | Overlap Yeast-<br>Human<br>(arctanh) | Overlap E.coli-<br>Human<br>(arctanh) |
|----------|-------------|-----------------------|-----------------|-----------------------------------|------------------------|--------------------------|--------------------------------------|---------------------------------------|
| peptides | OpenSWATH   | 11%                   | 32,479          | 17,774                            | 0.97                   | 0.99                     | 2.03                                 | 2.45                                  |
|          | SWATH2.0    | 8%                    | 24,268          | 11,804                            | 0.95                   | 0.98                     | 1.81                                 | 2.23                                  |
|          | Skyline     | 14%                   | 28,937          | 14,567                            | 0.92                   | 0.97                     | 1.59                                 | 2.03                                  |
|          | Spectronaut | 12%                   | 33,297          | 16,931                            | 0.89                   | 0.96                     | 1.43                                 | 1.93                                  |
|          | DIA-Umpire  | 12%                   | 28,781          | 13,295                            | 0.96                   | 0.98                     | 2.00                                 | 2.36                                  |
| proteins | OpenSWATH   | 10%                   | 3,844           | 2,467                             | 0.98                   | 0.99                     | 2.30                                 | 2.50                                  |
|          | SWATH2.0    | 9%                    | 2,813           | 1,714                             | 0.98                   | 1.00                     | 2.19                                 | 3.25                                  |
|          | Skyline     | 12%                   | 3,019           | 2,009                             | 0.94                   | 0.98                     | 1.72                                 | 2.20                                  |
|          | Spectronaut | 9%                    | 3,653           | 2,332                             | 0.91                   | 0.98                     | 1.51                                 | 2.22                                  |
|          | DIA-Umpire  | 13%                   | 3,010           | 1,820                             | 0.98                   | 1.00                     | 2.38                                 | 3.11                                  |

Supplementary Table 2.G: Metrics summary in HYE110, TTOF6600\_64fix.

|          |             | Median CV<br>of Human | Identifications | Valid<br>quantification<br>ratios | Overlap<br>Yeast-Human | Overlap E.coli-<br>Human | Overlap Yeast-<br>Human<br>(arctanh) | Overlap E.coli-<br>Human<br>(arctanh) |
|----------|-------------|-----------------------|-----------------|-----------------------------------|------------------------|--------------------------|--------------------------------------|---------------------------------------|
| peptides | OpenSWATH   | 8%                    | 37,133          | 21,721                            | 0.98                   | 0.99                     | 2.34                                 | 2.79                                  |
|          | SWATH2.0    | 6%                    | 29,483          | 15,224                            | 0.95                   | 0.98                     | 1.85                                 | 2.31                                  |
|          | Skyline     | 10%                   | 35,014          | 19,786                            | 0.94                   | 0.97                     | 1.70                                 | 2.09                                  |
|          | Spectronaut | 8%                    | 37,242          | 20,139                            | 0.93                   | 0.97                     | 1.68                                 | 2.09                                  |
|          | DIA-Umpire  | 12%                   | 37,167          | 17,238                            | 0.96                   | 0.98                     | 1.92                                 | 2.26                                  |
| proteins | OpenSWATH   | 6%                    | 4,307           | 2,881                             | 0.99                   | 1.00                     | 2.50                                 | 3.09                                  |
|          | SWATH2.0    | 5%                    | 3,438           | 2,151                             | 0.99                   | 0.99                     | 2.51                                 | 2.65                                  |
|          | Skyline     | 7%                    | 3,787           | 2,631                             | 0.95                   | 0.97                     | 1.83                                 | 2.09                                  |
|          | Spectronaut | 4%                    | 4,115           | 2,672                             | 0.95                   | 0.99                     | 1.85                                 | 2.55                                  |
|          | DIA-Umpire  | 13%                   | 3,641           | 2,233                             | 0.97                   | 1.00                     | 2.11                                 | 3.80                                  |

Supplementary Table 2.H: Metrics summary in HYE110, TTOF6600\_64var.

### **Supplementary Table 3. Number of identified peptides and proteins**

Numbers of peptides and proteins identified by each software tool in the samples HYE124 (iteration 1 and 2) and HYE110 across the different datasets are listed. The number of proteins is estimated after protein filters were applied at the FSWE module (first module of LFQbench): a protein must have a quantification value in at least two replicates of at least one of the samples (A or B). The change from 32 windows to 64 windows is estimated by taking the highest number of each of the respective modes (either fixed or variable).

The following pages show the numbers of identified peptides and proteins for:

- Supplementary Table 3.A: sample set HYE124 iteration 1 and 2
- Supplementary Table 3.B: sample set HYE110

|             |        | Iteration 1 |        |        |          |       |        |
|-------------|--------|-------------|--------|--------|----------|-------|--------|
|             |        | peptides    |        |        | proteins |       |        |
|             |        | 32fix       | 64var  | change | 32fix    | 64var | change |
| OpenSWATH   | 5600   | 26,225      | 34,154 | 30%    | 3,296    | 4,056 | 23%    |
|             | 6600   | 34,851      | 40,726 | 17%    | 4,030    | 4,632 | 15%    |
|             | change | 33%         | 19%    |        | 22%      | 14%   |        |
| SWATH 2.0   | 5600   | 17,988      | 27,750 | 54%    | 2,671    | 3,651 | 37%    |
|             | 6600   | 23,904      | 35,517 | 49%    | 3,269    | 4,323 | 32%    |
|             | change | 33%         | 28%    |        | 22%      | 18%   |        |
| Skyline     | 5600   | 25,090      | 35,508 | 42%    | 2,872    | 3,931 | 37%    |
|             | 6600   | 32,042      | 40,804 | 27%    | 3,582    | 4,518 | 26%    |
|             | change | 28%         | 15%    |        | 25%      | 15%   |        |
| Spectronaut | 5600   | 30,361      | 34,335 | 13%    | 3,379    | 3,751 | 11%    |
|             | 6600   | 38,974      | 42,439 | 9%     | 4,293    | 4,692 | 9%     |
|             | change | 28%         | 24%    |        | 27%      | 25%   |        |
| DIA-Umpire  | 5600   | 12,584      | 15,346 | 22%    | 1,668    | 1,880 | 13%    |
|             | 6600   | 25,042      | 36,332 | 45%    | 2,852    | 3,795 | 33%    |
|             | change | 99%         | 137%   |        | 71%      | 102%  |        |

|             |        | Iteration 2 |        |        |          |       |        |
|-------------|--------|-------------|--------|--------|----------|-------|--------|
|             |        | peptides    |        |        | proteins |       |        |
|             |        | 32fix       | 64var  | change | 32fix    | 64var | change |
| OpenSWATH   | 5600   | 26,767      | 34,476 | 29%    | 3,339    | 4,086 | 22%    |
|             | 6600   | 35,110      | 40,728 | 16%    | 4,035    | 4,636 | 15%    |
|             | change | 31%         | 18%    |        | 21%      | 13%   |        |
| SWATH 2.0   | 5600   | 17,962      | 27,701 | 54%    | 2,125    | 3,119 | 47%    |
|             | 6600   | 23,883      | 35,489 | 49%    | 2,656    | 3,946 | 49%    |
|             | change | 33%         | 28%    |        | 25%      | 27%   |        |
| Skyline     | 5600   | 26,341      | 34,206 | 30%    | 2,878    | 3,629 | 26%    |
|             | 6600   | 37,299      | 42,517 | 14%    | 4,046    | 4,692 | 16%    |
|             | change | 42%         | 24%    |        | 41%      | 29%   |        |
| Spectronaut | 5600   | 30,052      | 33,598 | 12%    | 3,332    | 3,669 | 10%    |
|             | 6600   | 38,443      | 42,325 | 10%    | 4,226    | 4,675 | 11%    |
|             | change | 28%         | 26%    |        | 27%      | 27%   |        |
| DIA-Umpire  | 5600   | 12,598      | 15,235 | 21%    | 1,566    | 1,781 | 14%    |
|             | 6600   | 24,872      | 36,249 | 46%    | 2,729    | 3,673 | 35%    |
|             | change | 97%         | 138%   |        | 74%      | 106%  |        |

Supplementary Table 3.A: Number of peptides and proteins identified in HYE124.

|             |       | peptides |                        |                      | proteins |                        |                      |
|-------------|-------|----------|------------------------|----------------------|----------|------------------------|----------------------|
|             |       | #        | change<br>(fix vs var) | change<br>(32 vs 64) | #        | change<br>(fix vs var) | change<br>(32 vs 64) |
| OpenSWATH   | 32fix | 30,848   | 8%                     | 11%                  | 3,700    | 8%                     | 8%                   |
|             | 32var | 33,462   |                        |                      | 3,988    |                        |                      |
|             | 64fix | 32,479   | 14%                    |                      | 3,844    | 12%                    |                      |
|             | 64var | 37,133   |                        |                      | 4,307    |                        |                      |
| SWATH 2.0   | 32fix | 20,742   | 16%                    | 22%                  | 2,421    | 17%                    | 21%                  |
|             | 32var | 24,151   |                        |                      | 2,840    |                        |                      |
|             | 64fix | 24,268   | 21%                    |                      | 2,813    | 22%                    |                      |
|             | 64var | 29,483   |                        |                      | 3,438    |                        |                      |
| Skyline     | 32fix | 27,236   | 17%                    | 10%                  | 2,878    | 20%                    | 9%                   |
|             | 32var | 31,761   |                        |                      | 3,461    |                        |                      |
|             | 64fix | 28,937   | 21%                    |                      | 3,019    | 25%                    |                      |
|             | 64var | 35,014   |                        |                      | 3,787    |                        |                      |
| Spectronaut | 32fix | 35,576   | 3%                     | 1%                   | 3,955    | 4%                     | 0%                   |
|             | 32var | 36,771   |                        |                      | 4,100    |                        |                      |
|             | 64fix | 33,297   | 12%                    |                      | 3,653    | 13%                    |                      |
|             | 64var | 37,242   |                        |                      | 4,115    |                        |                      |
| DIA-Umpire  | 32fix | 25,209   | 12%                    | 32%                  | 2,696    | 12%                    | 20%                  |
|             | 32var | 28,221   |                        |                      | 3,032    |                        |                      |
|             | 64fix | 28,781   | 29%                    |                      | 3,010    | 21%                    |                      |
|             | 64var | 37,167   |                        |                      | 3,641    |                        |                      |

Supplementary Table 3.B: Number of peptides and proteins identified in HYE110.

## Supplementary Table 4. Average $R^2$ regression values of between technical replicates

The quality of the single measurements was assessed by pairing technical replicates of the different samples (i.e.:  $A_1$  vs  $A_2$ ,  $A_1$  vs  $A_3$ , and  $A_2$  vs  $A_3$ ) and estimate their correlation. The following tables display the average and standard deviation of  $R^2$  of A vs A, A vs B, and B vs B pairs. Note that quantifications of A and B should only correlate for human proteins, and thus lower values of  $R^2$  for A vs B are reported.

The following pages show the Average  $R^2$  regression values of technical replicates pairing for:

- Supplementary Table 4.A: sample set HYE124 iteration 1 and 2
- Supplementary Table 4.B: sample set HYE110



## OpenSWATH

|                              | avg_R2_AA | avg_R2_error_AA | avg_R2_AB | avg_R2_error_AB | avg_R2_BB | avg_R2_error_BB |
|------------------------------|-----------|-----------------|-----------|-----------------|-----------|-----------------|
| <i>HYE124_TTOF5600_32fix</i> | 0.983     | 0.00430         | 0.693     | 0.00732         | 0.987     | 0.00115         |
| <i>HYE124_TTOF5600_64var</i> | 0.981     | 0.00728         | 0.704     | 0.01105         | 0.969     | 0.00359         |
| <i>HYE124_TTOF6600_32fix</i> | 0.966     | 0.01735         | 0.686     | 0.02684         | 0.931     | 0.02806         |
| <i>HYE124_TTOF6600_64var</i> | 0.988     | 0.00340         | 0.716     | 0.00841         | 0.989     | 0.00391         |

## Skyline

|                              | avg_R2_AA | avg_R2_error_AA | avg_R2_AB | avg_R2_error_AB | avg_R2_BB | avg_R2_error_BB |
|------------------------------|-----------|-----------------|-----------|-----------------|-----------|-----------------|
| <i>HYE124_TTOF5600_32fix</i> | 0.986     | 0.00456         | 0.764     | 0.00399         | 0.991     | 0.002132        |
| <i>HYE124_TTOF5600_64var</i> | 0.990     | 0.00192         | 0.759     | 0.00372         | 0.987     | 0.002047        |
| <i>HYE124_TTOF6600_32fix</i> | 0.987     | 0.00157         | 0.771     | 0.00427         | 0.991     | 0.000971        |
| <i>HYE124_TTOF6600_64var</i> | 0.909     | 0.06484         | 0.702     | 0.05421         | 0.983     | 0.013755        |

## Spectronaut

|                              | avg_R2_AA | avg_R2_error_AA | avg_R2_AB | avg_R2_error_AB | avg_R2_BB | avg_R2_error_BB |
|------------------------------|-----------|-----------------|-----------|-----------------|-----------|-----------------|
| <i>HYE124_TTOF5600_32fix</i> | 0.931     | 0.054651        | 0.791     | 0.04927         | 0.978     | 0.01679         |
| <i>HYE124_TTOF5600_64var</i> | 0.995     | 0.000259        | 0.735     | 0.11007         | 0.851     | 0.12259         |
| <i>HYE124_TTOF6600_32fix</i> | 0.991     | 0.003228        | 0.787     | 0.00771         | 0.982     | 0.01094         |
| <i>HYE124_TTOF6600_64var</i> | 0.995     | 0.002177        | 0.799     | 0.00759         | 0.997     | 0.00144         |

## SWATH 2.0

|                              | avg_R2_AA | avg_R2_error_AA | avg_R2_AB | avg_R2_error_AB | avg_R2_BB | avg_R2_error_BB |
|------------------------------|-----------|-----------------|-----------|-----------------|-----------|-----------------|
| <i>HYE124_TTOF5600_32fix</i> | 0.918     | 0.04608         | 0.713     | 0.0330          | 0.946     | 0.01466         |
| <i>HYE124_TTOF5600_64var</i> | 0.985     | 0.00615         | 0.751     | 0.0110          | 0.979     | 0.00627         |
| <i>HYE124_TTOF6600_32fix</i> | 0.833     | 0.10626         | 0.655     | 0.0690          | 0.861     | 0.05089         |
| <i>HYE124_TTOF6600_64var</i> | 0.833     | 0.07657         | 0.672     | 0.0863          | 0.912     | 0.06577         |

## DIA-Umpire

|                              | avg_R2_AA | avg_R2_error_AA | avg_R2_AB | avg_R2_error_AB | avg_R2_BB | avg_R2_error_BB |
|------------------------------|-----------|-----------------|-----------|-----------------|-----------|-----------------|
| <i>HYE124_TTOF5600_32fix</i> | 0.929     | 0.00768         | 0.772     | 0.0124          | 0.950     | 0.0247          |
| <i>HYE124_TTOF5600_64var</i> | 0.934     | 0.03512         | 0.749     | 0.0222          | 0.956     | 0.0021          |
| <i>HYE124_TTOF6600_32fix</i> | 0.943     | 0.03079         | 0.766     | 0.0171          | 0.941     | 0.0264          |
| <i>HYE124_TTOF6600_64var</i> | 0.939     | 0.01481         | 0.768     | 0.0145          | 0.942     | 0.0190          |

Supplementary Table 4.A:  $R^2$  regression values of technical replicates in HYE124.

## OpenSWATH

|                              | avg_R2_AA | avg_R2_error_AA | avg_R2_AB | avg_R2_error_AB | avg_R2_BB | avg_R2_error_BB |
|------------------------------|-----------|-----------------|-----------|-----------------|-----------|-----------------|
| <i>HYE110_TTOF6600_32fix</i> | 0.994     | 0.00260         | 0.549     | 0.1409          | 0.987     | 0.003706        |
| <i>HYE110_TTOF6600_32var</i> | 0.996     | 0.00161         | 0.756     | 0.0198          | 0.969     | 0.024200        |
| <i>HYE110_TTOF6600_64fix</i> | 0.989     | 0.00752         | 0.748     | 0.0347          | 0.997     | 0.000247        |
| <i>HYE110_TTOF6600_64var</i> | 0.994     | 0.00218         | 0.513     | 0.0329          | 0.993     | 0.000682        |

## Skyline

|                              | avg_R2_AA | avg_R2_error_AA | avg_R2_AB | avg_R2_error_AB | avg_R2_BB | avg_R2_error_BB |
|------------------------------|-----------|-----------------|-----------|-----------------|-----------|-----------------|
| <i>HYE110_TTOF6600_32fix</i> | 0.862     | 0.11449         | 0.663     | 0.0973          | 0.968     | 0.020531        |
| <i>HYE110_TTOF6600_32var</i> | 0.988     | 0.00872         | 0.729     | 0.0597          | 0.886     | 0.083625        |
| <i>HYE110_TTOF6600_64fix</i> | 0.896     | 0.06159         | 0.740     | 0.0723          | 0.997     | 0.000516        |
| <i>HYE110_TTOF6600_64var</i> | 0.944     | 0.03799         | 0.405     | 0.0225          | 0.990     | 0.001988        |

## Spectronaut

|                              | avg_R2_AA | avg_R2_error_AA | avg_R2_AB | avg_R2_error_AB | avg_R2_BB | avg_R2_error_BB |
|------------------------------|-----------|-----------------|-----------|-----------------|-----------|-----------------|
| <i>HYE110_TTOF6600_32fix</i> | 0.845     | 0.130729        | 0.660     | 0.10114         | 0.854     | 0.123848        |
| <i>HYE110_TTOF6600_32var</i> | 0.999     | 0.000419        | 0.806     | 0.00926         | 0.999     | 0.000471        |
| <i>HYE110_TTOF6600_64fix</i> | 0.993     | 0.005015        | 0.852     | 0.00638         | 0.997     | 0.001602        |
| <i>HYE110_TTOF6600_64var</i> | 0.992     | 0.002992        | 0.478     | 0.00398         | 0.995     | 0.002471        |

## SWATH 2.0

|                              | avg_R2_AA | avg_R2_error_AA | avg_R2_AB | avg_R2_error_AB | avg_R2_BB | avg_R2_error_BB |
|------------------------------|-----------|-----------------|-----------|-----------------|-----------|-----------------|
| <i>HYE110_TTOF6600_32fix</i> | 0.684     | 0.2680          | 0.471     | 0.1369          | 0.841     | 0.1342          |
| <i>HYE110_TTOF6600_32var</i> | 0.883     | 0.1004          | 0.676     | 0.0864          | 0.841     | 0.1308          |
| <i>HYE110_TTOF6600_64fix</i> | 0.964     | 0.0282          | 0.720     | 0.0804          | 0.853     | 0.1160          |
| <i>HYE110_TTOF6600_64var</i> | 0.946     | 0.0433          | 0.358     | 0.0254          | 0.960     | 0.0238          |

## DIA-Umpire

|                              | avg_R2_AA | avg_R2_error_AA | avg_R2_AB | avg_R2_error_AB | avg_R2_BB | avg_R2_error_BB |
|------------------------------|-----------|-----------------|-----------|-----------------|-----------|-----------------|
| <i>HYE110_TTOF6600_32fix</i> | 0.962     | 0.0097          | 0.606     | 0.0658          | 0.850     | 0.0933          |
| <i>HYE110_TTOF6600_32var</i> | 0.895     | 0.1135          | 0.626     | 0.0984          | 0.812     | 0.1102          |
| <i>HYE110_TTOF6600_64fix</i> | 0.891     | 0.1130          | 0.507     | 0.1010          | 0.720     | 0.1033          |
| <i>HYE110_TTOF6600_64var</i> | 0.896     | 0.0433          | 0.551     | 0.0445          | 0.903     | 0.0447          |

Supplementary Table 4.B:  $R^2$  regression values of technical replicates in HYE110.

## Supplementary Table 5. Configuration parameters for all software tools

Detailed configuration parameters for all software tools investigated.

The following pages show the configuration parameters for:

- Supplementary Table 5.A: Most common parameters for library-based tools
- Supplementary Table 5.B: parameters of OpenSWATH
- Supplementary Table 5.C: parameters of SWATH2.0
- Supplementary Table 5.D: parameters of Skyline
- Supplementary Table 5.E: parameters of Spectronaut
- Supplementary Table 5.F: parameters of DIA-Umpire

| Library-based Software tools critical parameters setup |                         |                         |                         |                                 |               |               |                   |
|--------------------------------------------------------|-------------------------|-------------------------|-------------------------|---------------------------------|---------------|---------------|-------------------|
| TripleTOF 5600                                         |                         | Iteration 1             |                         |                                 |               |               |                   |
|                                                        |                         | m/z window              | Resolving Power         | XIC extraction window (minutes) | # transitions | FDR threshold | Q-Value threshold |
|                                                        | OpenSWATH               | 50                      | -                       | 10                              | 6             | 0.01          | -                 |
|                                                        | PeakView                | 50                      | -                       | 10                              | 6             | 0.01          | -                 |
|                                                        | Skyline                 | -                       | 40000                   | 10                              | 3             | -             | 0.01              |
|                                                        | Spectronaut             | (dynamically estimated) | (dynamically estimated) | (dynamically estimated)         | 6             | -             | 0.01              |
|                                                        |                         | Iteration 2             |                         |                                 |               |               |                   |
|                                                        |                         | m/z window              | Resolving Power         | XIC extraction window (minutes) | # transitions | FDR threshold | Q-Value threshold |
|                                                        | OpenSWATH               | 50                      | -                       | 10                              | 6             | 0.01          | -                 |
|                                                        | PeakView                | 50                      | -                       | 10                              | 6             | 0.01          | -                 |
| Skyline                                                | -                       | 60000                   | 10                      | 3                               | -             | 0.01          |                   |
| Spectronaut                                            | (dynamically estimated) | (dynamically estimated) | (dynamically estimated) | 6                               | -             | 0.01          |                   |
| TripleTOF 6600                                         |                         | Iteration 1             |                         |                                 |               |               |                   |
|                                                        |                         | m/z window              | Resolving Power         | XIC extraction window (minutes) | # transitions | FDR threshold | Q-Value threshold |
|                                                        | OpenSWATH               | 30                      | -                       | 10                              | 6             | 0.01          | -                 |
|                                                        | PeakView                | 30                      | -                       | 10                              | 6             | 0.01          | -                 |
|                                                        | Skyline                 | -                       | 66660                   | 10                              | 3             | -             | 0.01              |
|                                                        | Spectronaut             | (dynamically estimated) | (dynamically estimated) | (dynamically estimated)         | 6             | -             | 0.01              |
|                                                        |                         | Iteration 2             |                         |                                 |               |               |                   |
|                                                        |                         | m/z window              | Resolving Power         | XIC extraction window (minutes) | # transitions | FDR threshold | Q-Value threshold |
|                                                        | OpenSWATH               | 30                      | -                       | 10                              | 6             | 0.01          | -                 |
|                                                        | PeakView                | 30                      | -                       | 10                              | 6             | 0.01          | -                 |
| Skyline                                                | -                       | 100000                  | 10                      | 3                               | -             | 0.01          |                   |
| Spectronaut                                            | (dynamically estimated) | (dynamically estimated) | (dynamically estimated) | 6                               | -             | 0.01          |                   |

Supplementary Table 5.A: Most common parameters for library-based tools.

## OpenSWATH

|                        | Iteration 1                                                                                                                                                                                                                                                        |                   |                |              |
|------------------------|--------------------------------------------------------------------------------------------------------------------------------------------------------------------------------------------------------------------------------------------------------------------|-------------------|----------------|--------------|
|                        | TripleTOF 5600                                                                                                                                                                                                                                                     |                   | TripleTOF 6600 |              |
|                        | 32 windows                                                                                                                                                                                                                                                         | 64 windows        | 32 windows     | 64 windows   |
| MIN_RSQ                | 0.95                                                                                                                                                                                                                                                               |                   |                |              |
| ALIGNER_DSCORE_CUTOFF  | 1                                                                                                                                                                                                                                                                  |                   |                |              |
| WORKFLOW               | openswath_2014-12-01-154112_2015-05-22-152035_imsbtools/20140808_applicake@6059b97_msproteomicstools@7527c7b_openms@7c408dd                                                                                                                                        |                   |                |              |
| ALIGNER_REALIGN_METHOD | lowess                                                                                                                                                                                                                                                             |                   |                |              |
| WINDOW_UNIT            | ppm                                                                                                                                                                                                                                                                |                   |                |              |
| TRAML                  | traml32file*                                                                                                                                                                                                                                                       | traml64file*      | traml32file*   | traml64file* |
| ALIGNER_TARGETFDR      | 0.01                                                                                                                                                                                                                                                               |                   |                |              |
| MIN_UPPER_EDGE_DIST    | 1                                                                                                                                                                                                                                                                  |                   |                |              |
| ALIGNER_MAX_RT_DIFF    | 30                                                                                                                                                                                                                                                                 |                   |                |              |
| IRTRAML                | /cluster/apps/imsbtools/stable/files/hroest_DIA_IRT.TraML                                                                                                                                                                                                          |                   |                |              |
| MPR_MAINVAR            | xx_swath_prelim_score                                                                                                                                                                                                                                              |                   |                |              |
| COMMENT                | IRR_Lib_5600_32SW                                                                                                                                                                                                                                                  | IRR_Lib_5600_64SW |                |              |
| MIN_COVERAGE           | 0.6                                                                                                                                                                                                                                                                |                   |                |              |
| PARENT-DATA-SET-CODES  | ** corresponding internal codes in server for the files.                                                                                                                                                                                                           |                   |                |              |
| RT_EXTRACTION_WINDOW   | 600                                                                                                                                                                                                                                                                |                   |                |              |
| MPR_VARS               | library_corr yseries_score xcorr_coelution_weighted massdev_score norm_rt_score library_rmsd bseries_score intensity_score xcorr_coelution<br>log_sn_score isotope_overlap_score massdev_score_weighted xcorr_shape_weighted isotope_correlation_score xcorr_shape |                   |                |              |
| ALIGNER_FRACSELECTED   | 0                                                                                                                                                                                                                                                                  |                   |                |              |
| EXTRACTION_WINDOW      | 50                                                                                                                                                                                                                                                                 |                   |                |              |
| MPR_NUM_XVAL           | 10                                                                                                                                                                                                                                                                 |                   |                |              |
| ALIGNER_METHOD         | global_best_overall                                                                                                                                                                                                                                                |                   |                |              |
| DO_CHROMML_REQUANT     | FALSE                                                                                                                                                                                                                                                              |                   |                |              |

|                        | Iteration 2                                                                                                                                                                                                                                                        |              |                |              |
|------------------------|--------------------------------------------------------------------------------------------------------------------------------------------------------------------------------------------------------------------------------------------------------------------|--------------|----------------|--------------|
|                        | TripleTOF 5600                                                                                                                                                                                                                                                     |              | TripleTOF 6600 |              |
|                        | 32 windows                                                                                                                                                                                                                                                         | 64 windows   | 32 windows     | 64 windows   |
| MIN_RSQ                | 0.95                                                                                                                                                                                                                                                               |              |                |              |
| ALIGNER_DSCORE_CUTOFF  | 1                                                                                                                                                                                                                                                                  |              |                |              |
| WORKFLOW               | openswath_2015-05-22-154105_imsbtools/20140808_applicake@6059b97_msproteomicstools@7527c7b_openms@7c408dd                                                                                                                                                          |              |                |              |
| ALIGNER_REALIGN_METHOD | lowess                                                                                                                                                                                                                                                             |              |                |              |
| WINDOW_UNIT            | ppm                                                                                                                                                                                                                                                                |              |                |              |
| TRAML                  | traml32file*                                                                                                                                                                                                                                                       | traml64file* | traml32file*   | traml64file* |
| ALIGNER_TARGETFDR      | 0.01                                                                                                                                                                                                                                                               |              |                |              |
| MIN_UPPER_EDGE_DIST    | 1                                                                                                                                                                                                                                                                  |              |                |              |
| ALIGNER_MAX_RT_DIFF    | 30                                                                                                                                                                                                                                                                 |              |                |              |
| IRTRAML                | /cluster/apps/imsbtools/stable/files/hroest_DIA_IRT.TraML                                                                                                                                                                                                          |              |                |              |
| MPR_MAINVAR            | xx_swath_prelim_score                                                                                                                                                                                                                                              |              |                |              |
| COMMENT                | IRR_Lib_5600_32SW_BG_CORR                                                                                                                                                                                                                                          |              |                |              |
| MIN_COVERAGE           | 0.6                                                                                                                                                                                                                                                                |              |                |              |
| PARENT-DATA-SET-CODES  | ** corresponding internal codes in server for the files.                                                                                                                                                                                                           |              |                |              |
| RT_EXTRACTION_WINDOW   | 600                                                                                                                                                                                                                                                                |              |                |              |
| MPR_VARS               | library_corr yseries_score xcorr_coelution_weighted massdev_score norm_rt_score library_rmsd bseries_score intensity_score xcorr_coelution<br>log_sn_score isotope_overlap_score massdev_score_weighted xcorr_shape_weighted isotope_correlation_score xcorr_shape |              |                |              |
| ALIGNER_FRACSELECTED   | 0                                                                                                                                                                                                                                                                  |              |                |              |
| EXTRACTION_WINDOW      | 50                                                                                                                                                                                                                                                                 |              |                |              |
| MPR_NUM_XVAL           | 10                                                                                                                                                                                                                                                                 |              |                |              |
| ALIGNER_METHOD         | global_best_overall                                                                                                                                                                                                                                                |              |                |              |
| DO_CHROMML_REQUANT     | FALSE                                                                                                                                                                                                                                                              |              |                |              |

\*  
traml32file ./ecoliHumanyeast\_concat\_mayu\_IRR\_cons\_openswath\_32sw\_curated\_decoy.TraML  
traml64file ./ecoliHumanyeast\_concat\_mayu\_IRR\_cons\_openswath\_64var\_curated\_decoy.TraML

\*\*  
codes\_5600\_32w 20150211221143737-1038504, 20150210205123604-1038204, 20150211161643511-1038423, 20150211021822894-1038280,  
20150211232943800-1038518, 20150210202322907-1038187, PDB-LGILLET-ECOLIHUMANYEASTCONCATMAYUIR-20150522131005  
codes\_5600\_64w 20150212083943868-1038587, 20150212103343910-1038642, 20150212121843915-1038648, 20150212171344465-1038846,  
20150211174243600-1038444, 20150211182443601-1038455, PDB-LGILLET-ECOLIHUMANYEASTCONCATMAYUIR-20150522122202  
codes\_6600\_32w 20150213113244196-1039325, 20150224023055874-1042500, 20150213033545820-1039270, 20150213224644148-1039490,  
20150224012055854-1042497, 20150213172344252-1039380, PDB-LGILLET-ECOLIHUMANYEASTCONCATMAYUIR-20150522131005  
codes\_6600\_64w 20150223142355786-1042242, 20150221040854005-1041481, 20150218233953981-1040703, 20150221050954009-1041502,  
20150223132455770-1042209, 20150221053954494-1041507, PDB-LGILLET-ECOLIHUMANYEASTCONCATMAYUIR-20150522122202

**Supplementary Table 5.B: Parameters of OpenSWATH.**

## SWATH 2.0

| <b>Iteration 1</b>                              |                       |                       |
|-------------------------------------------------|-----------------------|-----------------------|
|                                                 | <b>TripleTOF 5600</b> | <b>TripleTOF 6600</b> |
| <i>Number of Peptides per Protein</i>           | 2000                  |                       |
| <i>Number of Transitions per Peptide</i>        | 6                     |                       |
| <i>Peptide Confidence Threshold % (0-99)</i>    | 99                    |                       |
| <i>False Discovery Rate Threshold % (0-100)</i> | 1                     |                       |
| <i>Exclude Modified Peptides</i>                | unchecked             |                       |
| <i>Exclude Shared Peptides</i>                  | unchecked             |                       |
| <i>Fix Rank</i>                                 | unchecked             |                       |
| <i>XIC Extraction Window (min)</i>              | 10                    |                       |
| <i>XIC width (ppm)</i>                          | 50                    | 30                    |
| <i>XIC width (Da)</i>                           | unchecked             |                       |

| <b>Iteration 2</b>                              |                       |                       |
|-------------------------------------------------|-----------------------|-----------------------|
|                                                 | <b>TripleTOF 5600</b> | <b>TripleTOF 6600</b> |
| <i>Number of Peptides per Protein</i>           | 2000                  |                       |
| <i>Number of Transitions per Peptide</i>        | 6                     |                       |
| <i>Peptide Confidence Threshold % (0-99)</i>    | 99                    |                       |
| <i>False Discovery Rate Threshold % (0-100)</i> | 1                     |                       |
| <i>Exclude Modified Peptides</i>                | unchecked             |                       |
| <i>Exclude Shared Peptides</i>                  | unchecked             |                       |
| <i>Fix Rank</i>                                 | unchecked             |                       |
| <i>XIC Extraction Window (min)</i>              | 10                    |                       |
| <i>XIC width (ppm)</i>                          | 50                    | 30                    |
| <i>XIC width (Da)</i>                           | unchecked             |                       |

Supplementary Table 5.C: Parameters of SWATH2.0.

## Skyline

| Common Parameters to all iterations          |                                                                             |                                                                 |                                      |
|----------------------------------------------|-----------------------------------------------------------------------------|-----------------------------------------------------------------|--------------------------------------|
| <b>Peptide settings</b>                      | <i>Integrate all</i>                                                        |                                                                 | checked                              |
|                                              | Digestion                                                                   | Enzyme                                                          | Trypsin [KR P]                       |
|                                              |                                                                             | Max missed cleavages                                            | 0                                    |
|                                              |                                                                             | Background proteome                                             | None                                 |
|                                              | Prediction                                                                  | use measured retention times when present                       | checked                              |
|                                              |                                                                             | Time window (min)                                               | 3                                    |
|                                              |                                                                             | Drift time predictor                                            | None                                 |
|                                              |                                                                             | Use spectral library drift times when present                   | unchecked                            |
|                                              |                                                                             | Resolving power                                                 | (blank)                              |
|                                              | Filter                                                                      | Min length                                                      | 7                                    |
|                                              |                                                                             | Max length                                                      | 36                                   |
|                                              |                                                                             | Exclude N-terminal Aas                                          | 36                                   |
|                                              |                                                                             | Exclude potential ragged ends                                   | unchecked                            |
|                                              |                                                                             | Exclude peptides containing                                     | (blank)                              |
|                                              |                                                                             | Auto-select all matching peptides                               | checked                              |
|                                              |                                                                             | Pick peptides matching                                          | Library                              |
|                                              | Library                                                                     | Rank peptides by                                                | (blank)                              |
|                                              |                                                                             | Limit peptides per protein                                      | (blank)                              |
|                                              |                                                                             | Peptides                                                        | (blank)                              |
|                                              |                                                                             | Structural modifications                                        | Carbamidomethyl ( C ), Oxidation (M) |
| Max variable mods                            |                                                                             | 3                                                               |                                      |
| Modifications                                | Max neutral losses                                                          | 1                                                               |                                      |
|                                              | Isotope label type                                                          | heavy                                                           |                                      |
|                                              | Isotope modifications                                                       | Label: 13C(6)15N(2)(C-term K),<br>Label: 13C(6)15N(4)(C-term R) |                                      |
|                                              | Internal standard type                                                      | heavy                                                           |                                      |
|                                              | Precursor mass                                                              | Monoisotopic                                                    |                                      |
|                                              | Product ion mass                                                            | Monoisotopic                                                    |                                      |
| <b>Transition settings</b>                   | Prediction                                                                  | Collision energy                                                | ABI 5500 Q Trap                      |
|                                              |                                                                             | Declustering potential                                          | None                                 |
|                                              |                                                                             | Optimization library                                            | None                                 |
|                                              |                                                                             | Compensation voltage                                            | None                                 |
|                                              |                                                                             | Use optimization values when present                            | unchecked                            |
|                                              | Precursor charges                                                           | 2, 3                                                            |                                      |
|                                              | Ion charges                                                                 | 1, 2                                                            |                                      |
|                                              | Ion types                                                                   | y, b                                                            |                                      |
|                                              | Product ions - from                                                         | ion 3                                                           |                                      |
|                                              | Product ions - to                                                           | last ion - 1                                                    |                                      |
|                                              | Product ions - special ions                                                 | (blank)                                                         |                                      |
|                                              | Product ions - Use DIA window for exclusion                                 | checked                                                         |                                      |
|                                              | Auto-select all matching transitions                                        | checked                                                         |                                      |
|                                              | Ion match tolerance                                                         | 0.1                                                             |                                      |
|                                              | If a library spectrum is available, pick its most intense ions              | checked                                                         |                                      |
|                                              | Library                                                                     | Pick XX product ions                                            | 3                                    |
|                                              |                                                                             | From filtered ion charges and types                             | unchecked                            |
|                                              |                                                                             | From filtered ion charges and types plus filtered product ions  | unchecked                            |
|                                              |                                                                             | From filtered product ions                                      | checked                              |
|                                              |                                                                             | Min m/z                                                         | 50                                   |
|                                              | Max m/z                                                                     | 2000                                                            |                                      |
|                                              | Instrument                                                                  | dynamic min product m/z                                         | unchecked                            |
|                                              |                                                                             | Method match tolerance m/z                                      | 0.01                                 |
|                                              |                                                                             | Firmware transition limit                                       | (blank)                              |
|                                              |                                                                             | Firmware inclusion limit                                        | (blank)                              |
|                                              |                                                                             | Min time (min)                                                  | (blank)                              |
|                                              |                                                                             | Max time (min)                                                  | (blank)                              |
|                                              |                                                                             | M/S1 filtering - Isotope peaks included                         | None                                 |
|                                              |                                                                             | M/S1 filtering - Precursor mass analyzer                        | (blank)                              |
|                                              |                                                                             | M/S1 filtering - Peaks                                          | (blank)                              |
| M/S1 filtering - Resolution (m/z)            |                                                                             | (blank)                                                         |                                      |
| M/S1 filtering - Isotope labeling enrichment | (blank)                                                                     |                                                                 |                                      |
| Full-Scan                                    | M/S/M/S filtering - Acquisition method                                      | DIA                                                             |                                      |
|                                              | M/S/M/S filtering - Product mass analyzer                                   | TOF                                                             |                                      |
|                                              | Retention time filtering - use scans within XX minutes of M/S/M/S ids       | unchecked                                                       |                                      |
|                                              | Retention time filtering - Use only scans within XX minutes of predicted RT | 10                                                              |                                      |
|                                              | Include all matching scans                                                  | unchecked                                                       |                                      |
|                                              | annotations list                                                            | annotation_Qvalue                                               |                                      |
|                                              | group comparisons list                                                      | (blank)                                                         |                                      |
|                                              | name                                                                        | give any name to the model                                      |                                      |
|                                              | Choose model                                                                | mProphet                                                        |                                      |
|                                              | <b>Document settings</b>                                                    | Annotations                                                     | Training - Use decays                |
| Group Comparisons                            |                                                                             | Training - Use second best peaks                                | unchecked                            |
| <b>Reintegrate</b>                           | <i>Integrate all peaks</i>                                                  |                                                                 | checked                              |
|                                              | <i>Only integrate significant Q values</i>                                  |                                                                 | unchecked                            |
|                                              | <i>Q value cutoff</i>                                                       |                                                                 | (blank)                              |
|                                              | <i>Add q value annotation</i>                                               |                                                                 | checked                              |
|                                              | <i>Overwrite manual integration</i>                                         |                                                                 | checked                              |

### Skyline users iteration

|                     |                    |                                     | TripleTOF 5600                                                  |                  | TripleTOF 6600   |                  |
|---------------------|--------------------|-------------------------------------|-----------------------------------------------------------------|------------------|------------------|------------------|
|                     |                    |                                     | 32 windows                                                      | 64 windows       | 32 windows       | 64 windows       |
| File Import         | Results            | Raw type                            | raw (wiff file)                                                 |                  |                  |                  |
| Peptide settings    | Prediction         | Retention time predictor            | TTOF_32w_IRT-C18                                                | TTOF_64w_IRT-C18 | TTOF_32w_IRT-C18 | TTOF_64w_IRT-C18 |
|                     | Library            | Libraries                           | TTOF_32w-assay                                                  | TTOF_64w-assay   | TTOF_32w-assay   | TTOF_64w-assay   |
| Transition settings | Full-Scan          | MS/M/S filtering - Isolation scheme | SWATH_32fixed                                                   | SWATH_64windows  | SWATH_32fixed    | SWATH_64windows  |
|                     |                    | MS/M/S filtering - Resolving power  | 20000                                                           |                  | 33330            |                  |
| Reintegrate         | Peak scoring model |                                     | All values are automatically assigned when the model is trained |                  |                  |                  |

### Iteration 1

|                     |                    |                                     | TripleTOF 5600                                                  |                  | TripleTOF 6600   |                  |
|---------------------|--------------------|-------------------------------------|-----------------------------------------------------------------|------------------|------------------|------------------|
|                     |                    |                                     | 32 windows                                                      | 64 windows       | 32 windows       | 64 windows       |
| File Import         | Results            | Raw type                            | raw (wiff file)                                                 |                  |                  |                  |
| Peptide settings    | Prediction         | Retention time predictor            | TTOF_32w_IRT-C18                                                | TTOF_64w_IRT-C18 | TTOF_32w_IRT-C18 | TTOF_64w_IRT-C18 |
|                     | Library            | Libraries                           | TTOF_32w-assay                                                  | TTOF_64w-assay   | TTOF_32w-assay   | TTOF_64w-assay   |
| Transition settings | Full-Scan          | MS/M/S filtering - Isolation scheme | SWATH_32fixed                                                   | SWATH_64windows  | SWATH_32fixed    | SWATH_64windows  |
|                     |                    | MS/M/S filtering - Resolving power  | 40000                                                           |                  | 66660            |                  |
| Reintegrate         | Peak scoring model |                                     | All values are automatically assigned when the model is trained |                  |                  |                  |

### Iteration 2

|                     |                    |                                     | TripleTOF 5600                                                  |                  | TripleTOF 6600   |                  |
|---------------------|--------------------|-------------------------------------|-----------------------------------------------------------------|------------------|------------------|------------------|
|                     |                    |                                     | 32 windows                                                      | 64 windows       | 32 windows       | 64 windows       |
| File Import         | Results            | Raw type                            | centroid (mzML file)                                            |                  |                  |                  |
| Peptide settings    | Prediction         | Retention time predictor            | TTOF_32w_IRT-C18                                                | TTOF_64w_IRT-C18 | TTOF_32w_IRT-C18 | TTOF_64w_IRT-C18 |
|                     | Library            | Libraries                           | TTOF_32w-assay                                                  | TTOF_64w-assay   | TTOF_32w-assay   | TTOF_64w-assay   |
| Transition settings | Full-Scan          | MS/M/S filtering - Isolation scheme | SWATH_32fixed                                                   | SWATH_64windows  | SWATH_32fixed    | SWATH_64windows  |
|                     |                    | MS/M/S filtering - Resolving power  | 60000                                                           |                  | 100000           |                  |
| Reintegrate         | Peak scoring model |                                     | All values are automatically assigned when the model is trained |                  |                  |                  |

**Supplementary Table 5.D: Parameters of Skyline.**

| <b>Spectronaut</b>     |                                      |                               |
|------------------------|--------------------------------------|-------------------------------|
| <b>both iterations</b> |                                      |                               |
| <b>Peak Detection</b>  | <i>XIC Extraction Window</i>         | Dynamic Window                |
|                        | <i>Correction Factor</i>             | 1                             |
| <b>Calibration</b>     | <i>Force Calibration</i>             | FALSE                         |
|                        | <i>iRT Calibration Strategy</i>      | Non-Linear iRT Calibration    |
| <b>Identification</b>  | <i>Dynamic Score Refinement</i>      | TRUE                          |
|                        | <i>Pvalue Estimator</i>              | Normal Distribution Estimator |
|                        | <i>Include MS1 Scoring</i>           | TRUE                          |
| <b>Quantitation</b>    | <i>Interference Correction</i>       | TRUE                          |
|                        | <i>Cross Run Normalization</i>       | TRUE                          |
|                        | <i>Normalization Base</i>            | Total Peak Area               |
|                        | <i>Profiling Strategy</i>            | iRT Profiling                 |
| <b>Workflow</b>        | <i>Profiling Row Selection</i>       | Minimum Qvalue Row Selection  |
|                        | <i>Qvalue Threshold</i>              | 0.01                          |
|                        | <i>Profiling Target Selection</i>    | Automatic Selection           |
|                        | <i>Default Labeling Type Assumed</i> | LABEL                         |
|                        | <i>Regulation Analysis</i>           | Student's T-Test              |
| <b>Post Analysis</b>   | <i>Quantity Base</i>                 | MS2 Peak Area                 |
|                        | <i>Row Selection Strategy</i>        | Qvalue Based Row Selection    |
|                        | <i>Row Filter</i>                    | Sparse Profiles               |
|                        | <i>Qvalue threshold</i>              | 0.01                          |
|                        | <i>NA Recovery</i>                   | unchecked                     |
|                        | <i>Peptide Grouping</i>              | Protein Grouping              |
|                        | <i>Pipeline Report Schema</i>        | SWATHbenchmark (Normal)       |
| <b>Reporting</b>       | <i>Pipeline Report</i>               | Experiment                    |
|                        | <i>Generate SNE File</i>             | TRUE                          |

Supplementary Table 5.E: Parameters of Spectronaut.



| DIA-Umpire        |                          |                                |            |                |            |
|-------------------|--------------------------|--------------------------------|------------|----------------|------------|
|                   |                          | both iterations                |            |                |            |
|                   |                          | TripleTOF 5600                 |            | TripleTOF 6600 |            |
|                   |                          | 32 windows                     | 64 windows | 32 windows     | 64 windows |
| Signal extraction | RPmax                    | 25                             |            |                |            |
|                   | RFmax                    | 300                            |            |                |            |
|                   | CorrThreshold            | 0.2                            |            |                |            |
|                   | DeltaApex                | 0.6                            |            |                |            |
|                   | RTOverlap                | 0.3                            |            |                |            |
|                   | AdjustFragIntensity      | TRUE                           |            |                |            |
|                   | BoostComplementaryIon    | TRUE                           |            |                |            |
|                   | MS1PPM                   | 30                             |            |                |            |
|                   | MS2PPM                   | 40                             |            |                |            |
|                   | SN                       | 1.5                            |            |                |            |
|                   | MS2SN                    | 1.5                            |            |                |            |
|                   | MinMSIntensity           | 300                            | 500        | 300            | 400        |
|                   | MinMSMSIntensity         | 30                             | 50         | 30             | 40         |
|                   | MaxCurveRTRange          | 1.5                            |            |                |            |
|                   | StartCharge              | 1                              |            |                |            |
|                   | EndCharge                | 5                              |            |                |            |
|                   | MS2StartCharge           | 2                              |            |                |            |
|                   | MS2EndCharge             | 4                              |            |                |            |
| NoMissedScan      | 2                        | 2                              | 1          | 1              |            |
| EstimateBG        | FALSE                    |                                |            |                |            |
| IsoPattern        | 0.5                      |                                |            |                |            |
| Database search   | X! Tandem                | tandem.param                   |            |                |            |
|                   | PeptideProphet(X!Tandem) | "-OpdEAP -PPM -dreverse -p0.1" |            |                |            |
|                   | Comet                    | comet.param                    |            |                |            |
|                   | PeptideProphet(Comet)    | "-OpdAP -PPM -dreverse -p0.1"  |            |                |            |
|                   | MSGF+                    | -s *.mzXML -d                  |            |                |            |
| Quantification    | PeptideProphet(MSGF+)    | "-OpdEAP -PPM -dreverse -p0.1" |            |                |            |
|                   | TopNFrags                | 6                              |            |                |            |
|                   | TopNPeps                 | 6                              |            |                |            |
|                   | Freq                     | 0.5                            |            |                |            |
|                   | FilterWeight             | GW                             |            |                |            |
|                   | MinWeight                | 0.9                            |            |                |            |
|                   | Peptide FDR              | 0.01                           |            |                |            |
|                   | Protein FDR              | 0.01                           |            |                |            |
| ProbThreshold     | 0.5                      |                                |            |                |            |

Supplementary Table 5.F: Parameters of DIA-Umpire.

## **Supplementary Table 6. Analysis of the dynamic ranges on peptide and protein level**

Dynamic ranges of peptide and protein quantification values are expressed as orders of magnitude and were estimated by using the intensity range between 1% and 99% percentiles of quantification values.

The following pages show the dynamic ranges for:

- Supplementary Table 6.A: sample set HYE124 iteration 1 and 2
- Supplementary Table 6.B: sample set HYE110

|                   |                    | <b>Peptides</b>       |                    |                       |                    |
|-------------------|--------------------|-----------------------|--------------------|-----------------------|--------------------|
|                   |                    | <b>TripleTOF 5600</b> |                    | <b>TripleTOF 6600</b> |                    |
|                   |                    | <b>Iteration 1</b>    | <b>Iteration 2</b> | <b>Iteration 1</b>    | <b>Iteration 2</b> |
| <b>32 windows</b> | <b>OpenSWATH</b>   | 2.81                  | 3.18               | 3.40                  | 3.67               |
|                   | <b>SWATH2.0</b>    | 3.03                  | 2.92               | 3.57                  | 3.23               |
|                   | <b>Skyline</b>     | 2.94                  | 2.96               | 3.53                  | 3.40               |
|                   | <b>Spectronaut</b> | 3.29                  | 3.60               | 3.75                  | 3.93               |
|                   | <b>DIA-Umpire</b>  | 3.14                  | 3.05               | 3.69                  | 3.64               |
| <b>64 windows</b> | <b>OpenSWATH</b>   | 3.00                  | 3.23               | 3.60                  | 3.78               |
|                   | <b>SWATH2.0</b>    | 3.22                  | 3.06               | 3.83                  | 3.73               |
|                   | <b>Skyline</b>     | 3.13                  | 3.09               | 3.77                  | 3.73               |
|                   | <b>Spectronaut</b> | 3.31                  | 3.47               | 3.90                  | 4.04               |
|                   | <b>DIA-Umpire</b>  | 3.18                  | 3.10               | 3.78                  | 3.72               |

|                   |                    | <b>Proteins</b>       |                    |                       |                    |
|-------------------|--------------------|-----------------------|--------------------|-----------------------|--------------------|
|                   |                    | <b>TripleTOF 5600</b> |                    | <b>TripleTOF 6600</b> |                    |
|                   |                    | <b>Iteration 1</b>    | <b>Iteration 2</b> | <b>Iteration 1</b>    | <b>Iteration 2</b> |
| <b>32 windows</b> | <b>OpenSWATH</b>   | 2.02                  | 2.45               | 2.54                  | 2.79               |
|                   | <b>SWATH2.0</b>    | 2.47                  | 2.36               | 2.84                  | 2.68               |
|                   | <b>Skyline</b>     | 2.36                  | 2.35               | 2.71                  | 2.73               |
|                   | <b>Spectronaut</b> | 2.63                  | 2.73               | 2.92                  | 2.99               |
|                   | <b>DIA-Umpire</b>  | 2.41                  | 2.21               | 2.98                  | 2.91               |
| <b>64 windows</b> | <b>OpenSWATH</b>   | 2.37                  | 2.58               | 2.93                  | 3.15               |
|                   | <b>SWATH2.0</b>    | 2.57                  | 2.45               | 3.03                  | 2.92               |
|                   | <b>Skyline</b>     | 2.47                  | 2.55               | 2.99                  | 2.99               |
|                   | <b>Spectronaut</b> | 2.68                  | 2.77               | 3.11                  | 3.21               |
|                   | <b>DIA-Umpire</b>  | 2.42                  | 2.26               | 3.08                  | 2.99               |

Supplementary Table 6.A: Dynamic ranges in HYE124.

| <b>Peptides</b>    |                   |                 |                   |            |
|--------------------|-------------------|-----------------|-------------------|------------|
|                    | <b>32 windows</b> |                 | <b>64 windows</b> |            |
|                    | <b>fixed</b>      | <b>variable</b> | <b>fix</b>        | <b>var</b> |
| <b>OpenSWATH</b>   | 4.16              | 4.26            | 4.26              | 4.10       |
| <b>SWATH2.0</b>    | 3.88              | 4.03            | 4.02              | 3.61       |
| <b>Skyline</b>     | 3.90              | 4.05            | 4.14              | 3.78       |
| <b>Spectronaut</b> | 4.36              | 4.46            | 4.67              | 4.35       |
| <b>DIA-Umpire</b>  | 3.58              | 3.67            | 3.84              | 3.78       |

| <b>Proteins</b>    |                   |                 |                   |            |
|--------------------|-------------------|-----------------|-------------------|------------|
|                    | <b>32 windows</b> |                 | <b>64 windows</b> |            |
|                    | <b>fixed</b>      | <b>variable</b> | <b>fix</b>        | <b>var</b> |
| <b>OpenSWATH</b>   | 3.44              | 3.42            | 3.54              | 3.24       |
| <b>SWATH2.0</b>    | 3.06              | 3.18            | 3.22              | 3.01       |
| <b>Skyline</b>     | 3.02              | 3.16            | 3.25              | 3.07       |
| <b>Spectronaut</b> | 3.42              | 3.50            | 3.75              | 3.31       |
| <b>DIA-Umpire</b>  | 2.89              | 2.86            | 3.00              | 2.99       |

Supplementary Table 6.B: Dynamic ranges in HYE110.

## Supplementary Table 7. SWATH isolation windows setups

Isolation m/z ranges applied on each SWATH configuration handled in this study.

| 32 fixed windows |          |        | 32 variable windows |          |        | 64 fixed windows |          |        | 64 variable windows |          |        |
|------------------|----------|--------|---------------------|----------|--------|------------------|----------|--------|---------------------|----------|--------|
|                  | mz.start | mz.end |                     | mz.start | mz.end |                  | mz.start | mz.end |                     | mz.start | mz.end |
| swath.1          | 399      | 425    | swath.1             | 399.5    | 415.8  | swath.1          | 399      | 412.5  | swath.1             | 399.5    | 408.2  |
| swath.2          | 424      | 450    | swath.2             | 414.8    | 429.7  | swath.2          | 411.5    | 425    | swath.2             | 407.2    | 415.8  |
| swath.3          | 449      | 475    | swath.3             | 428.7    | 444.8  | swath.3          | 424      | 437.5  | swath.3             | 414.8    | 422.7  |
| swath.4          | 474      | 500    | swath.4             | 443.8    | 458.7  | swath.4          | 436.5    | 450    | swath.4             | 421.7    | 429.7  |
| swath.5          | 499      | 525    | swath.5             | 457.7    | 473.4  | swath.5          | 449      | 462.5  | swath.5             | 428.7    | 437.3  |
| swath.6          | 524      | 550    | swath.6             | 472.4    | 485.4  | swath.6          | 461.5    | 475    | swath.6             | 436.3    | 444.8  |
| swath.7          | 549      | 575    | swath.7             | 484.4    | 497.7  | swath.7          | 474      | 487.5  | swath.7             | 443.8    | 451.7  |
| swath.8          | 574      | 600    | swath.8             | 496.7    | 511.2  | swath.8          | 486.5    | 500    | swath.8             | 450.7    | 458.7  |
| swath.9          | 599      | 625    | swath.9             | 510.2    | 525.3  | swath.9          | 499      | 512.5  | swath.9             | 457.7    | 466.7  |
| swath.10         | 624      | 650    | swath.10            | 524.3    | 540.3  | swath.10         | 511.5    | 525    | swath.10            | 465.7    | 473.4  |
| swath.11         | 649      | 675    | swath.11            | 539.3    | 554.5  | swath.11         | 524      | 537.5  | swath.11            | 472.4    | 478.3  |
| swath.12         | 674      | 700    | swath.12            | 553.5    | 568.3  | swath.12         | 536.5    | 550    | swath.12            | 477.3    | 485.4  |
| swath.13         | 699      | 725    | swath.13            | 567.3    | 582.3  | swath.13         | 549      | 562.5  | swath.13            | 484.4    | 491.2  |
| swath.14         | 724      | 750    | swath.14            | 581.3    | 595.8  | swath.14         | 561.5    | 575    | swath.14            | 490.2    | 497.7  |
| swath.15         | 749      | 775    | swath.15            | 594.8    | 608.9  | swath.15         | 574      | 587.5  | swath.15            | 496.7    | 504.3  |
| swath.16         | 774      | 800    | swath.16            | 607.9    | 624.8  | swath.16         | 586.5    | 600    | swath.16            | 503.3    | 511.2  |
| swath.17         | 799      | 825    | swath.17            | 623.8    | 640.8  | swath.17         | 599      | 612.5  | swath.17            | 510.2    | 518.2  |
| swath.18         | 824      | 850    | swath.18            | 639.8    | 654.8  | swath.18         | 611.5    | 625    | swath.18            | 517.2    | 525.3  |
| swath.19         | 849      | 875    | swath.19            | 653.8    | 670.3  | swath.19         | 624      | 637.5  | swath.19            | 524.3    | 533.3  |
| swath.20         | 874      | 900    | swath.20            | 669.3    | 687.8  | swath.20         | 636.5    | 650    | swath.20            | 532.3    | 540.3  |
| swath.21         | 899      | 925    | swath.21            | 686.8    | 706.9  | swath.21         | 649      | 662.5  | swath.21            | 539.3    | 546.8  |
| swath.22         | 924      | 950    | swath.22            | 705.9    | 726.2  | swath.22         | 661.5    | 675    | swath.22            | 545.8    | 554.5  |
| swath.23         | 949      | 975    | swath.23            | 725.2    | 746.6  | swath.23         | 674      | 687.5  | swath.23            | 553.5    | 561.8  |
| swath.24         | 974      | 1000   | swath.24            | 745.6    | 767.9  | swath.24         | 686.5    | 700    | swath.24            | 560.8    | 568.3  |
| swath.25         | 999      | 1025   | swath.25            | 766.9    | 792.9  | swath.25         | 699      | 712.5  | swath.25            | 567.3    | 575.7  |
| swath.26         | 1024     | 1050   | swath.26            | 791.9    | 820    | swath.26         | 711.5    | 725    | swath.26            | 574.7    | 582.3  |
| swath.27         | 1049     | 1075   | swath.27            | 819      | 849.4  | swath.27         | 724      | 737.5  | swath.27            | 581.3    | 588.8  |
| swath.28         | 1074     | 1100   | swath.28            | 848.4    | 884.4  | swath.28         | 736.5    | 750    | swath.28            | 587.8    | 595.8  |
| swath.29         | 1099     | 1125   | swath.29            | 883.4    | 919    | swath.29         | 749      | 762.5  | swath.29            | 594.8    | 601.8  |
| swath.30         | 1124     | 1150   | swath.30            | 918      | 971.6  | swath.30         | 761.5    | 775    | swath.30            | 600.8    | 608.9  |
| swath.31         | 1149     | 1175   | swath.31            | 970.6    | 1053   | swath.31         | 774      | 787.5  | swath.31            | 607.9    | 616.9  |
| swath.32         | 1174     | 1200   | swath.32            | 1052     | 1200.5 | swath.32         | 786.5    | 800    | swath.32            | 615.9    | 624.8  |
|                  |          |        |                     |          |        | swath.33         | 799      | 812.5  | swath.33            | 623.8    | 632.2  |
|                  |          |        |                     |          |        | swath.34         | 811.5    | 825    | swath.34            | 631.2    | 640.8  |
|                  |          |        |                     |          |        | swath.35         | 824      | 837.5  | swath.35            | 639.8    | 647.9  |
|                  |          |        |                     |          |        | swath.36         | 836.5    | 850    | swath.36            | 646.9    | 654.8  |
|                  |          |        |                     |          |        | swath.37         | 849      | 862.5  | swath.37            | 653.8    | 661.5  |
|                  |          |        |                     |          |        | swath.38         | 861.5    | 875    | swath.38            | 660.5    | 670.3  |
|                  |          |        |                     |          |        | swath.39         | 874      | 887.5  | swath.39            | 669.3    | 678.8  |
|                  |          |        |                     |          |        | swath.40         | 886.5    | 900    | swath.40            | 677.8    | 687.8  |
|                  |          |        |                     |          |        | swath.41         | 899      | 912.5  | swath.41            | 686.8    | 696.9  |
|                  |          |        |                     |          |        | swath.42         | 911.5    | 925    | swath.42            | 695.9    | 706.9  |
|                  |          |        |                     |          |        | swath.43         | 924      | 937.5  | swath.43            | 705.9    | 715.9  |
|                  |          |        |                     |          |        | swath.44         | 936.5    | 950    | swath.44            | 714.9    | 726.2  |
|                  |          |        |                     |          |        | swath.45         | 949      | 962.5  | swath.45            | 725.2    | 737.4  |
|                  |          |        |                     |          |        | swath.46         | 961.5    | 975    | swath.46            | 736.4    | 746.6  |
|                  |          |        |                     |          |        | swath.47         | 974      | 987.5  | swath.47            | 745.6    | 757.5  |
|                  |          |        |                     |          |        | swath.48         | 986.5    | 1000   | swath.48            | 756.5    | 767.9  |
|                  |          |        |                     |          |        | swath.49         | 999      | 1012.5 | swath.49            | 766.9    | 779.5  |
|                  |          |        |                     |          |        | swath.50         | 1011.5   | 1025   | swath.50            | 778.5    | 792.9  |
|                  |          |        |                     |          |        | swath.51         | 1024     | 1037.5 | swath.51            | 791.9    | 807    |
|                  |          |        |                     |          |        | swath.52         | 1036.5   | 1050   | swath.52            | 806      | 820    |
|                  |          |        |                     |          |        | swath.53         | 1049     | 1062.5 | swath.53            | 819      | 834.2  |
|                  |          |        |                     |          |        | swath.54         | 1061.5   | 1075   | swath.54            | 833.2    | 849.4  |
|                  |          |        |                     |          |        | swath.55         | 1074     | 1087.5 | swath.55            | 848.4    | 866    |
|                  |          |        |                     |          |        | swath.56         | 1086.5   | 1100   | swath.56            | 865      | 884.4  |
|                  |          |        |                     |          |        | swath.57         | 1099     | 1112.5 | swath.57            | 883.4    | 899.9  |
|                  |          |        |                     |          |        | swath.58         | 1111.5   | 1125   | swath.58            | 898.9    | 919    |
|                  |          |        |                     |          |        | swath.59         | 1124     | 1137.5 | swath.59            | 918      | 942.1  |
|                  |          |        |                     |          |        | swath.60         | 1136.5   | 1150   | swath.60            | 941.1    | 971.6  |
|                  |          |        |                     |          |        | swath.61         | 1149     | 1162.5 | swath.61            | 970.6    | 1006   |
|                  |          |        |                     |          |        | swath.62         | 1161.5   | 1175   | swath.62            | 1005     | 1053   |
|                  |          |        |                     |          |        | swath.63         | 1174     | 1187.5 | swath.63            | 1052     | 1110.6 |
|                  |          |        |                     |          |        | swath.64         | 1186.5   | 1200   | swath.64            | 1109.6   | 1200.5 |

Supplementary Table 7: Isolation m/z ranges applied on each swath configuration.

## Supplementary Table 8. Ion Libraries Statistics

The library used by OpenSWATH, SWATH2.0, Skyline, and Spectronaut consists of identifications from separate, triplicate DDA acquisitions of samples from each species (human, yeast, and E.coli). A consensus of the search results of two different database search engines (Comet and Mascot) was used to build the ion library. Fragment ions with an  $m/z$  within the range of the SWATH precursor isolation window were excluded from the library due to interferences with unfragmented precursor ions. Since the different SWATH windows configurations (64 variable, 64 fixed, 32 variable, and 32 fixed) have different precursor isolation windows, a library for each mode (with different excluded ions) was built. The number of proteins counts all proteins present in the library including proteins that share their sequence with other proteins. Protein groups were defined by iProphet, and any reference to the number of proteins identified by a software tool is referred to protein groups.

Biognosys AG provided a dedicated library of Orbitrap/Fusion assays of human peptides including 6,826 peptides, which were exclusively detected by DIA-Umpire. The other 2,556 (a total of 9,382 peptides are present in the library) were excluded from the study.

### 32 fixed windows assay library statistics

| Species | Proteins | Protein groups | Peptides | Precursors | Sequences | Transitions |
|---------|----------|----------------|----------|------------|-----------|-------------|
| ECOLI   | 1,564    | 1,594          | 12,753   | 13,304     | 12,514    | 79,824      |
| HUMAN   | 3,136    | 3,148          | 16,405   | 16,995     | 16,353    | 101,970     |
| YEAST   | 2,005    | 2,105          | 14,272   | 14,885     | 14,172    | 89,310      |
| Total   | 6,705    | 6,847          | 43,430   | 45,184     | 43,039    | 271,104     |

### 32 variable windows assay library statistics

| Species | Proteins | Protein groups | Peptides | Precursors | Sequences | Transitions |
|---------|----------|----------------|----------|------------|-----------|-------------|
| ECOLI   | 1,571    | 1,602          | 12,897   | 13,448     | 12,656    | 80,772      |
| HUMAN   | 3,153    | 3,191          | 16,621   | 17,219     | 16,569    | 104,112     |
| YEAST   | 2,017    | 2,128          | 14,569   | 15,186     | 14,467    | 91,116      |
| Total   | 6,741    | 6,921          | 44,087   | 45,853     | 43,692    | 276,000     |

### 64 fixed windows assay library statistics

| Species | Proteins | Protein groups | Peptides | Precursors | Sequences | Transitions |
|---------|----------|----------------|----------|------------|-----------|-------------|
| ECOLI   | 1,572    | 1,603          | 12,938   | 13,490     | 12,694    | 80,940      |
| HUMAN   | 3,161    | 3,199          | 16,788   | 17,387     | 16,736    | 104,364     |
| YEAST   | 2,020    | 2,131          | 14,473   | 15,093     | 14,370    | 91,398      |
| Total   | 6,753    | 6,933          | 44,199   | 45,970     | 43,800    | 276,702     |

### 64 variable windows assay library statistics

| Species | Proteins | Protein groups | Peptides | Precursors | Sequences | Transitions |
|---------|----------|----------------|----------|------------|-----------|-------------|
| ECOLI   | 1,575    | 1,605          | 12,999   | 13,550     | 12,754    | 81,300      |
| HUMAN   | 3,159    | 3,176          | 16,755   | 17,349     | 16,703    | 104,094     |
| YEAST   | 2,021    | 2,122          | 14,540   | 15,153     | 14,440    | 90,918      |
| Total   | 6,755    | 6,903          | 44,294   | 46,052     | 43,897    | 276,312     |

### DIA-Umpire dedicated assay library statistics

| Species | Proteins | Protein groups | Peptides | Precursors | Sequences | Transitions |
|---------|----------|----------------|----------|------------|-----------|-------------|
| HUMAN   | 2,734    | 2,734          | 9,382    | 14,007     | 7,641     | 82,626      |

Supplementary Table 8: Ion Libraries Statistics.

## Supplementary Table 9. $\log_2$ ratios shift corrections

In order to correctly assess the accuracy of relative quantification it is necessary to shift all quantification values (expressed in  $\log_2$  ratios) to a reference. We estimate the reference as the average of all quantification values (in  $\log_2$  ratios) of the human proteins (or peptides). Since human proteins (and peptides) are expected to be in the same proportion in both samples, A and B, all quantitation values are shifted by subtracting the estimated reference value (average of human proteins or peptides). Note that by doing this shift the accuracy of the human peptides (or proteins) at the Supplementary Table 4 is artificially set to zero.

The following pages show the  $\log_2$  ratios shift corrections of quantified peptides and proteins for:

- Supplementary Table 9.A: sample set HYE124 iteration 1 and 2
- Supplementary Table 9.B: sample set HYE110



|            |             | Peptides       |             |                |             |
|------------|-------------|----------------|-------------|----------------|-------------|
|            |             | TripleTOF 5600 |             | TripleTOF 6600 |             |
|            |             | Iteration 1    | Iteration 2 | Iteration 1    | Iteration 2 |
| 32 windows | OpenSWATH   | -0.024         | -0.005      | 0.048          | 0.066       |
|            | SWATH2.0    | -0.005         | -0.003      | 0.069          | 0.056       |
|            | Skyline     | -0.007         | -0.031      | 0.063          | 0.056       |
|            | Spectronaut | -0.015         | -0.006      | -0.025         | -0.012      |
|            | DIA-Umpire  | 0.032          | 0.029       | 0.061          | 0.056       |
| 64 windows | OpenSWATH   | -0.009         | 0.000       | 0.048          | 0.055       |
|            | SWATH2.0    | -0.006         | -0.006      | 0.056          | 0.057       |
|            | Skyline     | -0.004         | 0.064       | 0.053          | 0.047       |
|            | Spectronaut | -0.015         | -0.006      | -0.029         | -0.019      |
|            | DIA-Umpire  | 0.002          | -0.005      | 0.066          | 0.063       |

|            |                       | Proteins       |             |                |             |
|------------|-----------------------|----------------|-------------|----------------|-------------|
|            |                       | TripleTOF 5600 |             | TripleTOF 6600 |             |
|            |                       | Iteration 1    | Iteration 2 | Iteration 1    | Iteration 2 |
| 32 windows | OpenSWATH             | -0.025         | -0.011      | 0.038          | 0.054       |
|            | SWATH2.0              | -0.005         | 0.002       | 0.052          | 0.049       |
|            | SWATH2.0 (built-in)   | -0.010         | NA          | 0.056          | NA          |
|            | Skyline               | -0.012         | -0.040      | 0.057          | 0.042       |
|            | Spectronaut           | -0.011         | -0.010      | -0.032         | -0.019      |
|            | DIA-Umpire            | 0.064          | 0.058       | 0.053          | 0.054       |
|            | DIA-Umpire (built-in) | 0.088          | NA          | 0.051          | NA          |
| 64 windows | OpenSWATH             | -0.003         | 0.003       | 0.045          | 0.049       |
|            | SWATH2.0              | -0.003         | 0.001       | 0.051          | 0.055       |
|            | SWATH2.0 (built-in)   | -0.007         | NA          | 0.044          | NA          |
|            | Skyline               | 0.003          | 0.066       | 0.050          | 0.049       |
|            | Spectronaut           | -0.017         | -0.009      | -0.033         | -0.024      |
|            | DIA-Umpire            | 0.008          | -0.001      | 0.056          | 0.049       |
|            | DIA-Umpire (built-in) | 0.010          | NA          | 0.055          | NA          |

Supplementary Table 9.A:  $\log_2$  ratios shift corrections in HYE124.

| <b>Peptides</b>    |                   |                 |                   |            |
|--------------------|-------------------|-----------------|-------------------|------------|
|                    | <b>32 windows</b> |                 | <b>64 windows</b> |            |
|                    | <b>fixed</b>      | <b>variable</b> | <b>fix</b>        | <b>var</b> |
| <b>OpenSWATH</b>   | -0.092            | -0.071          | -0.127            | 0.035      |
| <b>SWATH2.0</b>    | -0.090            | -0.072          | -0.116            | 0.039      |
| <b>Skyline</b>     | -0.181            | -0.102          | -0.110            | 0.028      |
| <b>Spectronaut</b> | 0.005             | -0.008          | -0.037            | -0.002     |
| <b>DIA-Umpire</b>  | -0.051            | -0.068          | -0.105            | 0.040      |

| <b>Proteins</b>    |                   |                 |                   |            |
|--------------------|-------------------|-----------------|-------------------|------------|
|                    | <b>32 windows</b> |                 | <b>64 windows</b> |            |
|                    | <b>fixed</b>      | <b>variable</b> | <b>fix</b>        | <b>var</b> |
| <b>OpenSWATH</b>   | -0.124            | -0.094          | -0.159            | 0.026      |
| <b>SWATH2.0</b>    | -0.102            | -0.091          | -0.134            | 0.032      |
| <b>Skyline</b>     | -0.177            | -0.118          | -0.131            | 0.027      |
| <b>Spectronaut</b> | -0.007            | -0.026          | -0.107            | -0.020     |
| <b>DIA-Umpire</b>  | -0.081            | -0.115          | -0.152            | 0.028      |

Supplementary Table 9.B:  $\log_2$  ratios shift corrections in HYE110.

# Supplementary Figures

**Supplementary Figure 1. Schematic overview of the datasets acquired and analyzed in this study.**

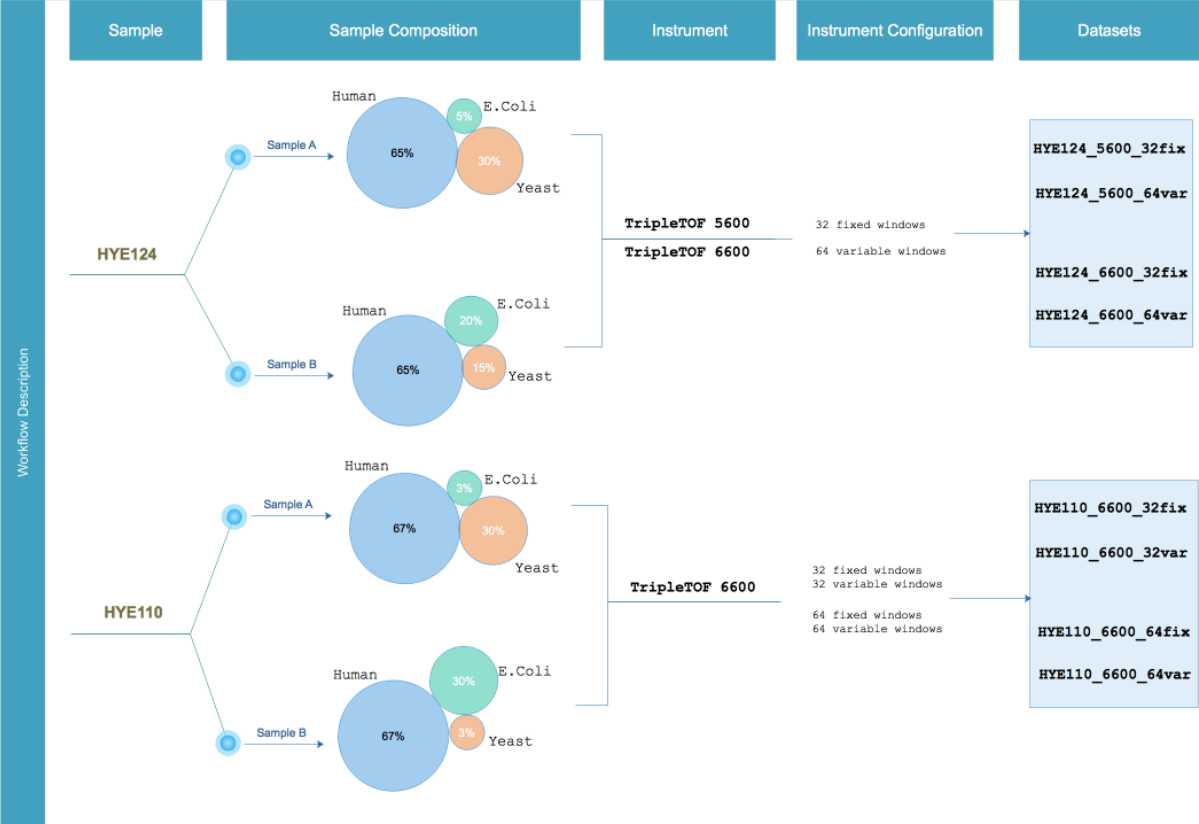

**Supplementary Figure 1:** Schematic overview of the datasets acquired and analyzed in this study.

## Supplementary Figure 2. Simulated quantification data.

A LFQ data simulator is provided with LFQbench. This simulator helps to visualize how ideal or biased LFQ data look in LFQbench plots. Panel A shows an ideal (unbiased) simulated experiment. Panels B, C, and D show the same simulated experiment as in panel A with an increasing quantity of background signal (1-, 2-, and 3- times the minimum intensity detected in the dataset) added to all peptide signals.

LFQ data simulation was performed by simulating the  $\log_2$  ratios of 2000 human proteins (expected  $\log_2$  ratio = 0), 1500 yeast proteins (expected  $\log_2$  ratio = 1), and 1000 E.coli proteins (expected  $\log_2$  ratio = -2) from normal distributions centered at the expected  $\log_2$  ratios and standard deviations of  $\sigma = 0.1$ . For each protein, the number of peptides is simulated by a Poisson distribution with  $\lambda = 6$  (with a minimum value of 1). The protein intensity is distributed among its peptides, for which ionization efficiencies were simulated by a standard normal distribution.

Three technical replicates for each peptide and sample were simulated by choosing three random values from a normal distribution centered at the peptide intensity value and  $\sigma = 0.01$ . A random noise factor was added to each peptide intensity using random values from a normal distribution of  $\mu = 0$  and  $\sigma = 2^{13}$ . Finally, in order to simulate missing values, 1% of randomly chosen peptides from the total simulated peptide signals were removed.

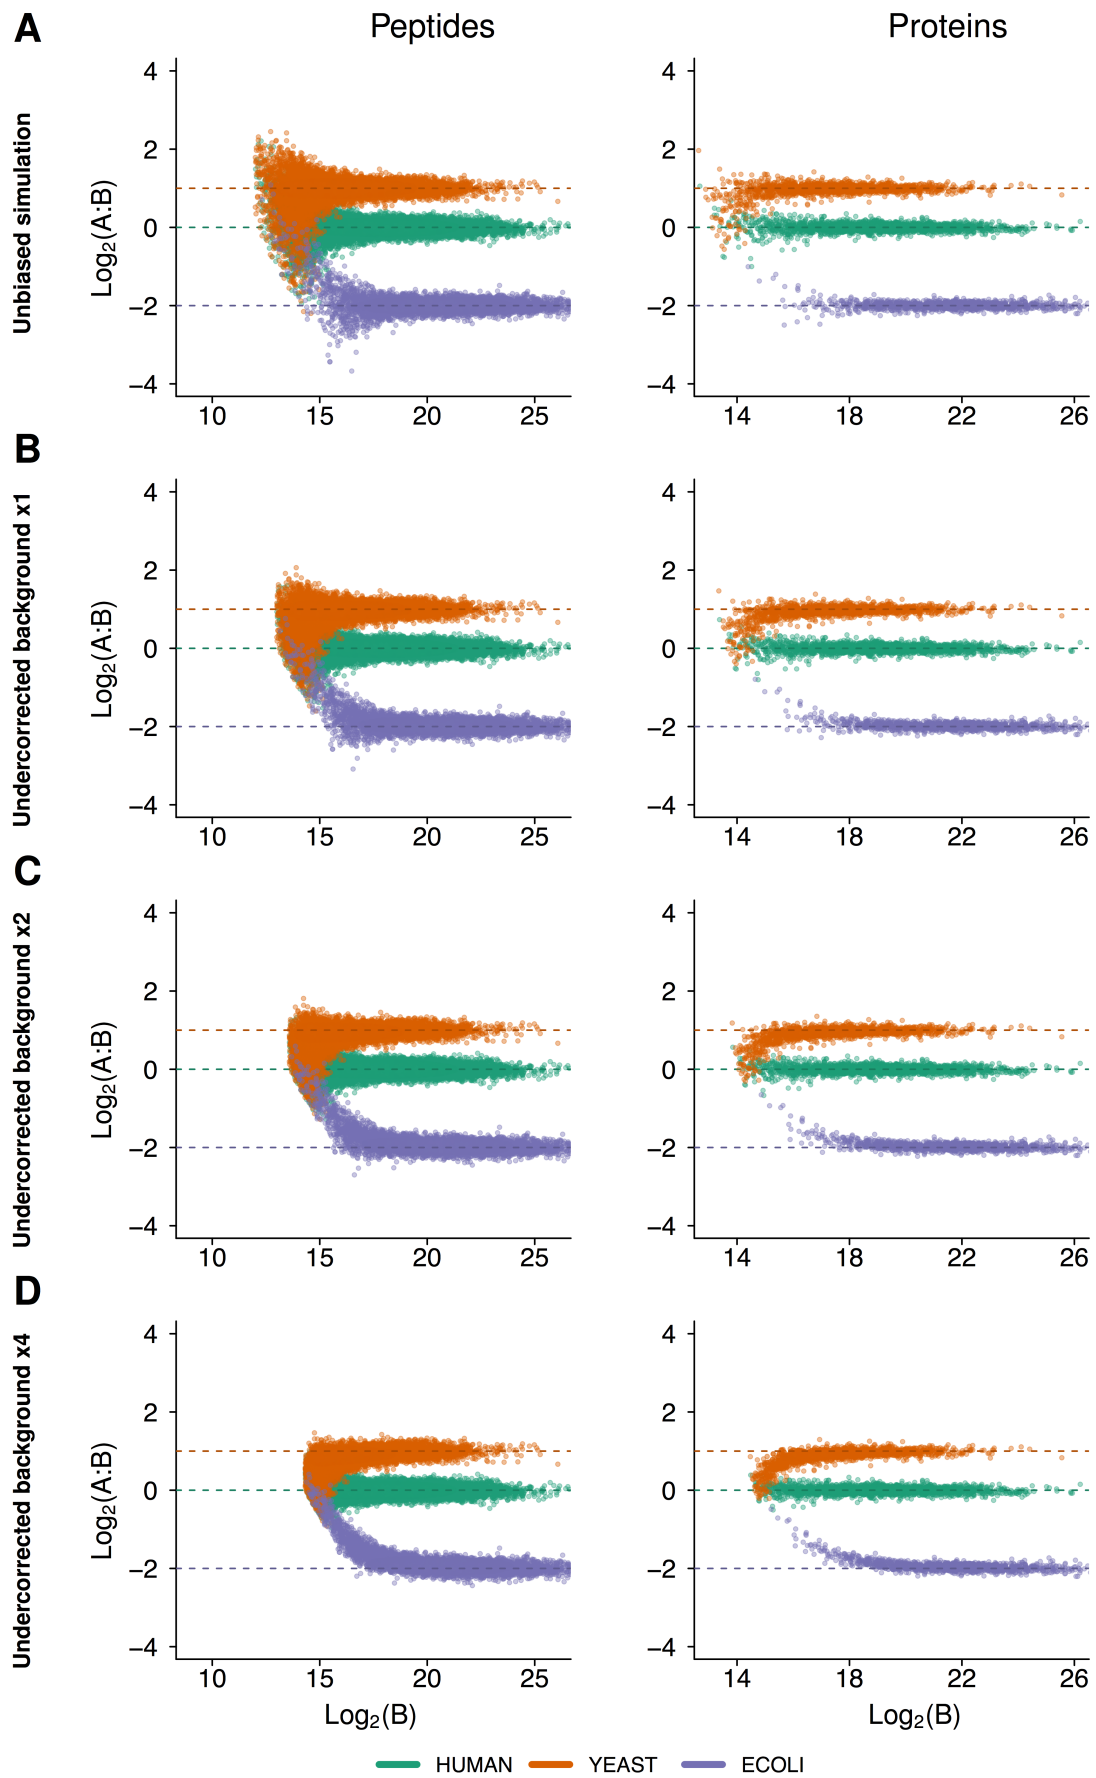

**Supplementary Figure 2:** Simulated quantification data with perfect background subtraction (A) and undercorrected background levels (B, C, D).

### Supplementary Figure 3. Signal-to-noise ratios for all datasets.

Distribution of the signal-to-noise ratio of all detected peaks (FDR < 0.01) as detected in Spectronaut for samples HYE124 and HYE110. The sample HYE124 allows to compare both instruments (TripleTOF 5600 vs TripleTOF 6600), whereas the sample HYE110 allows to compare the four different SWATH modes tested (32 fixed windows, 32 variable windows, 64 fixed windows, and 64 variable windows). For both, 32 fixed windows and 64 variable windows setups, the TripleTOF 6600 platform displayed a higher median signal-to-noise ratio as compared to the TripleTOF 5600 platform. For each instrument platform, the calculated median signal-to-noise ratio was higher for the 64 window setup.

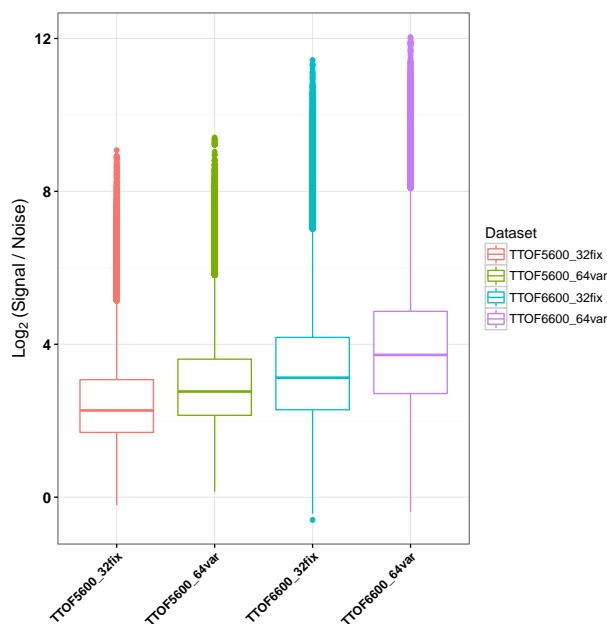

Supplementary Figure 3.A: Signal-to-Noise ratios for all datasets in HYE124 sample set.

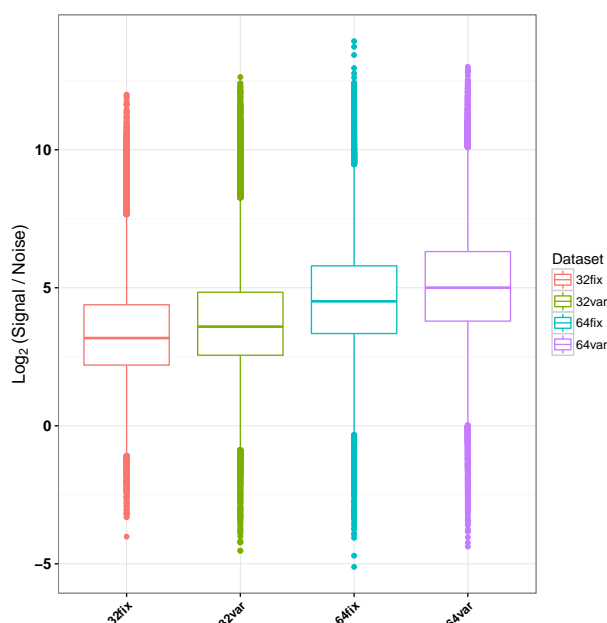

Supplementary Figure 3.B: Signal-to-Noise ratios for all datasets in HYE110 sample set.

## Supplementary Figure 4. Precursor intensity correlation between technical replicates.

Intensity signal correlations of detected precursors (FDR < 0.01) of technical replicates are exemplarily shown for  $A_1$  vs  $A_3$  and  $A_3$  vs  $B_1$ . The other possible pairs (e.g.  $A_1$  vs  $A_2$ ,  $A_1$  vs  $B_3$ ) display a very similar pattern. For  $A_1$  vs  $A_3$  a linear regression trend line is shown in red and the average  $R^2$  regression parameter (average of all possible pairs of sample A) is displayed below. A higher correlation is observed within technical replicates of the same sample ( $A_1$  vs  $A_3$ ), and the patterns of expression change of Yeast and E.coli are visible at the  $A_3$  vs  $B_1$  pairs.

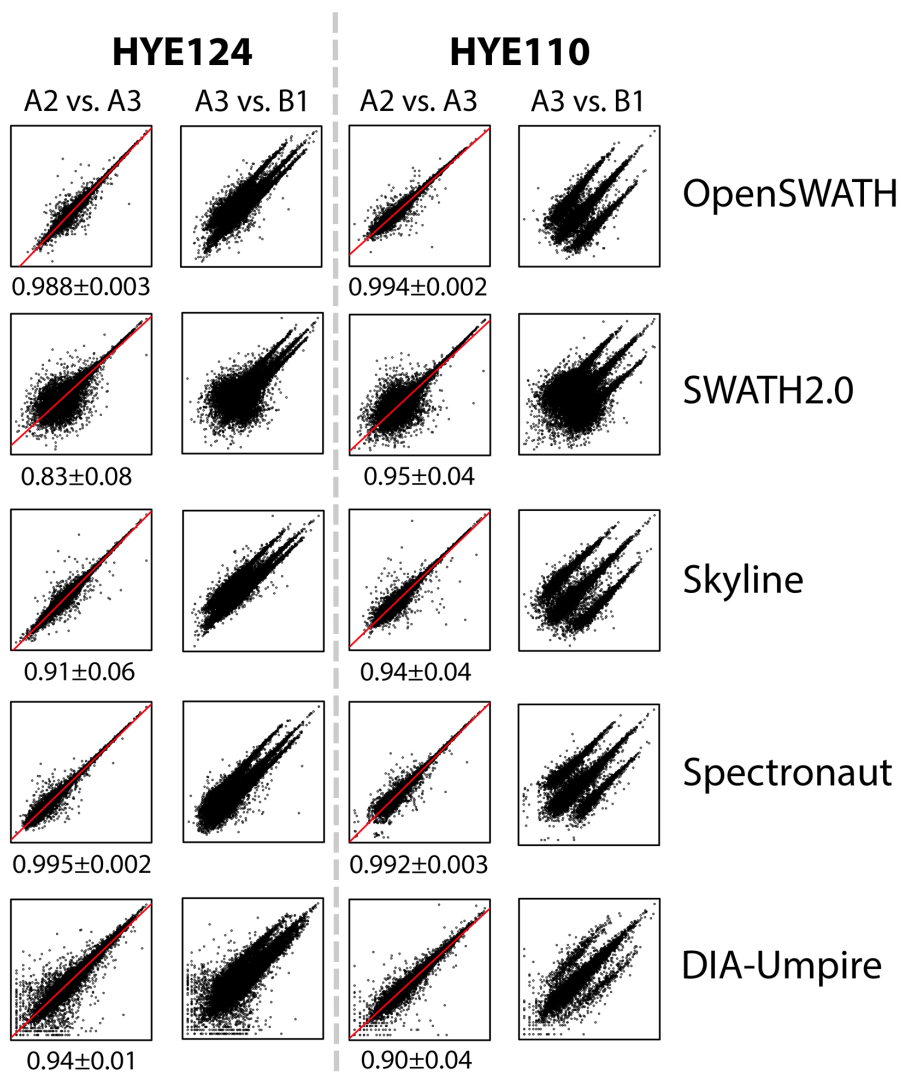

Supplementary Figure 4: Precursor intensity correlation between technical replicates.



## **Supplementary Figure 5. Coefficients of Variance (CVs) between technical replicates for human proteins and peptides.**

The following pages show the CVs between technical replicates for human proteins and peptides for:

- Supplementary Figure 5.A: HYE 124, TripleTOF 5600, 32fix setup
- Supplementary Figure 5.B: HYE 124, TripleTOF 5600, 64var setup
- Supplementary Figure 5.C: HYE 124, TripleTOF 6600, 32fix setup
- Supplementary Figure 5.D: HYE 124, TripleTOF 6600, 64var setup
- Supplementary Figure 5.E: HYE 110, TripleTOF 6600, 32fix setup
- Supplementary Figure 5.F: HYE 110, TripleTOF 6600, 32var setup
- Supplementary Figure 5.G: HYE 110, TripleTOF 6600, 64fix setup
- Supplementary Figure 5.H: HYE 110, TripleTOF 6600, 64var setup

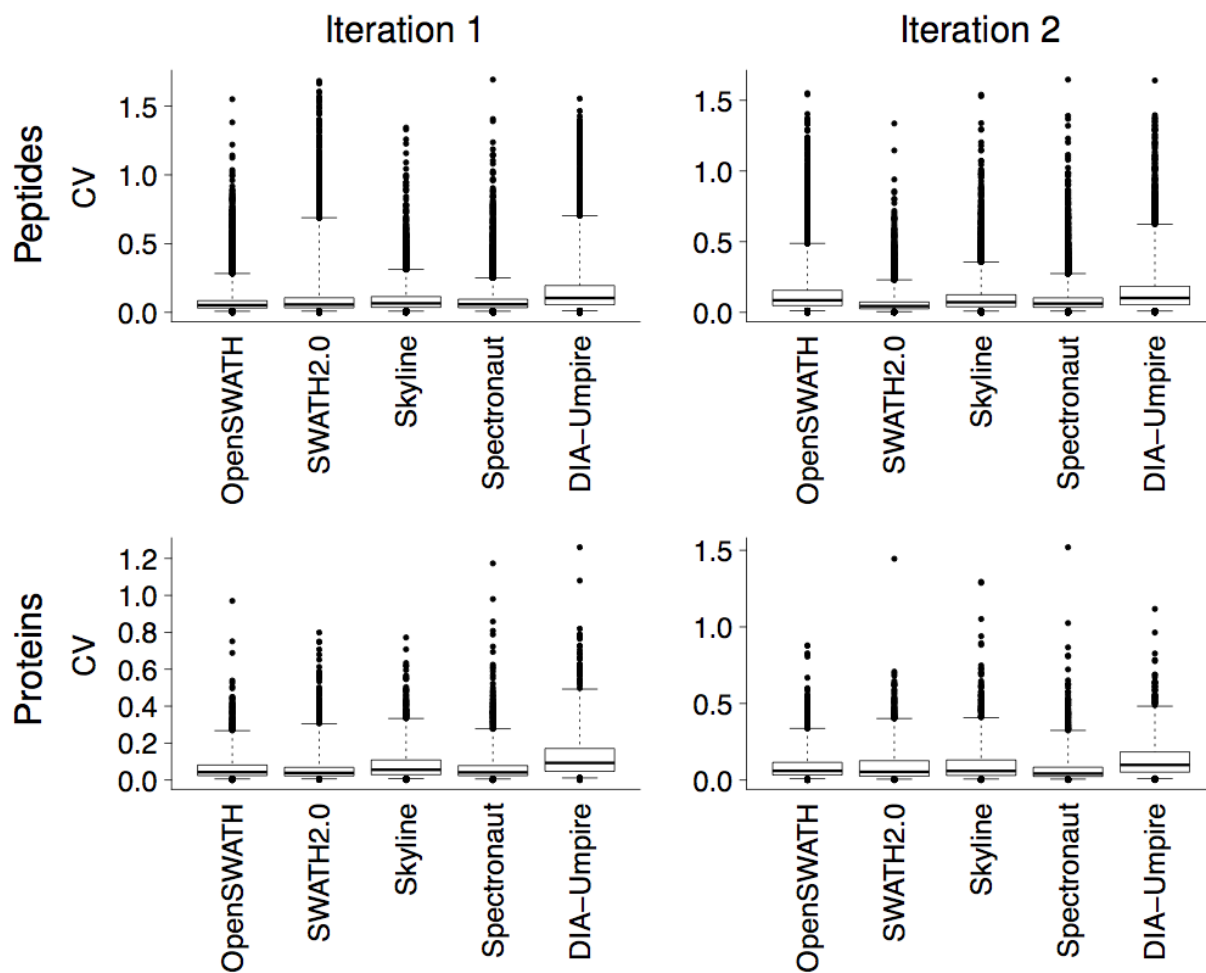

**Supplementary Figure 5.A:** Coefficients of Variance (CVs) between technical replicates for human proteins and peptides for HYE 124, TripleTOF 5600, 32fix setup.

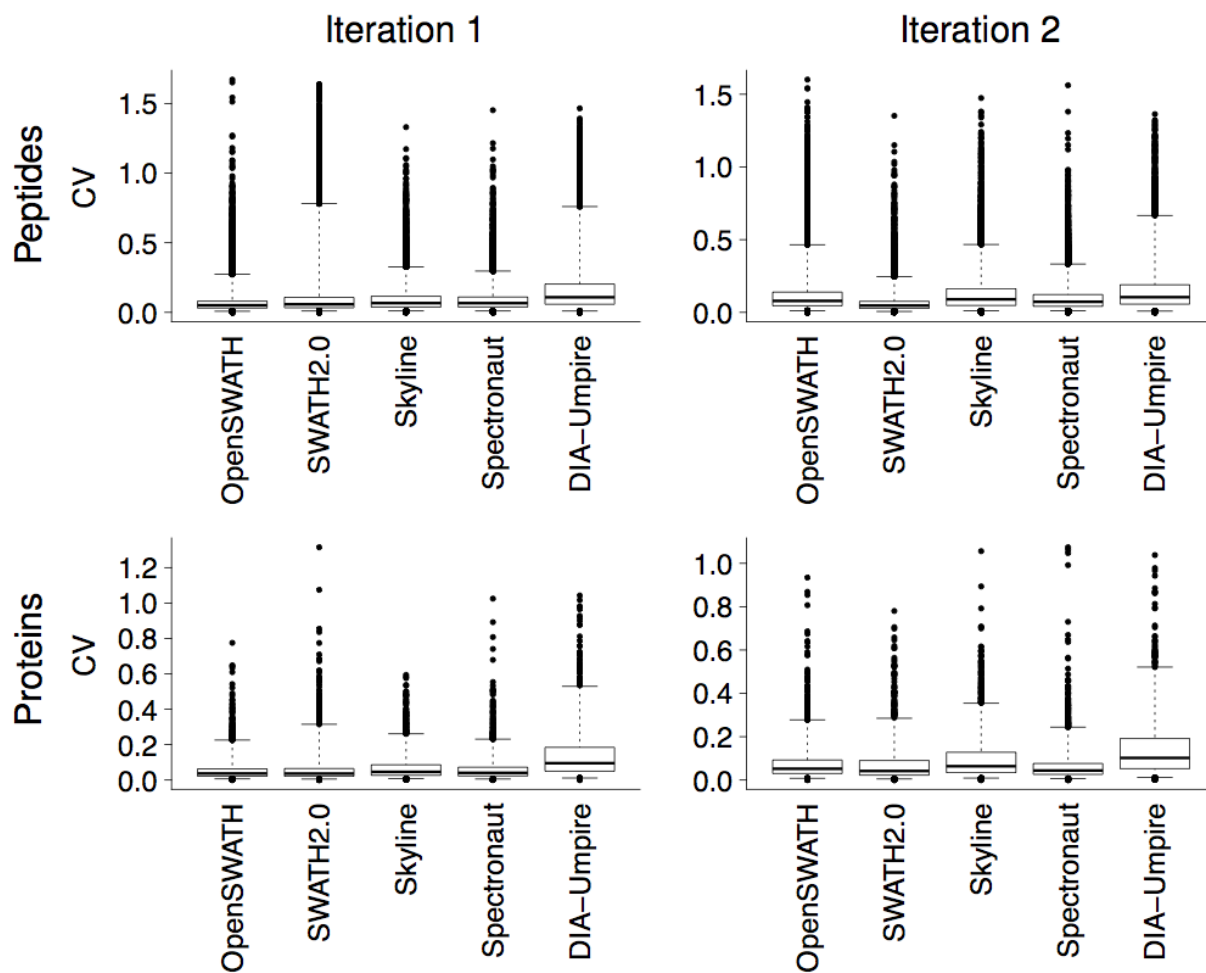

**Supplementary Figure 5.B:** Coefficients of Variance (CVs) between technical replicates for human proteins and peptides for HYE 124, TripleTOF 5600, 64var setup.

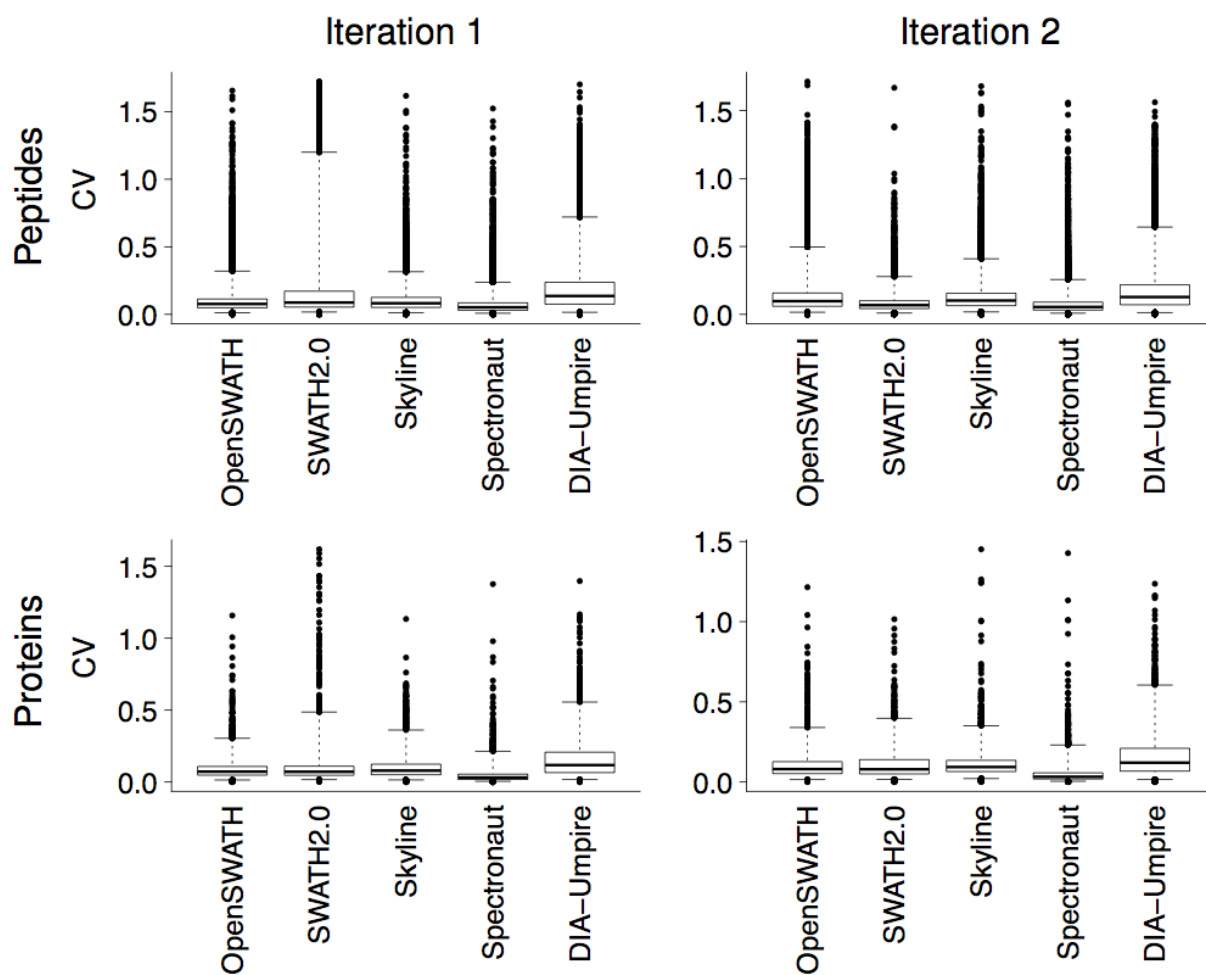

**Supplementary Figure 5.C:** Coefficients of Variance (CVs) between technical replicates for human proteins and peptides for HYE 124, TripleTOF 6600, 32fix setup.

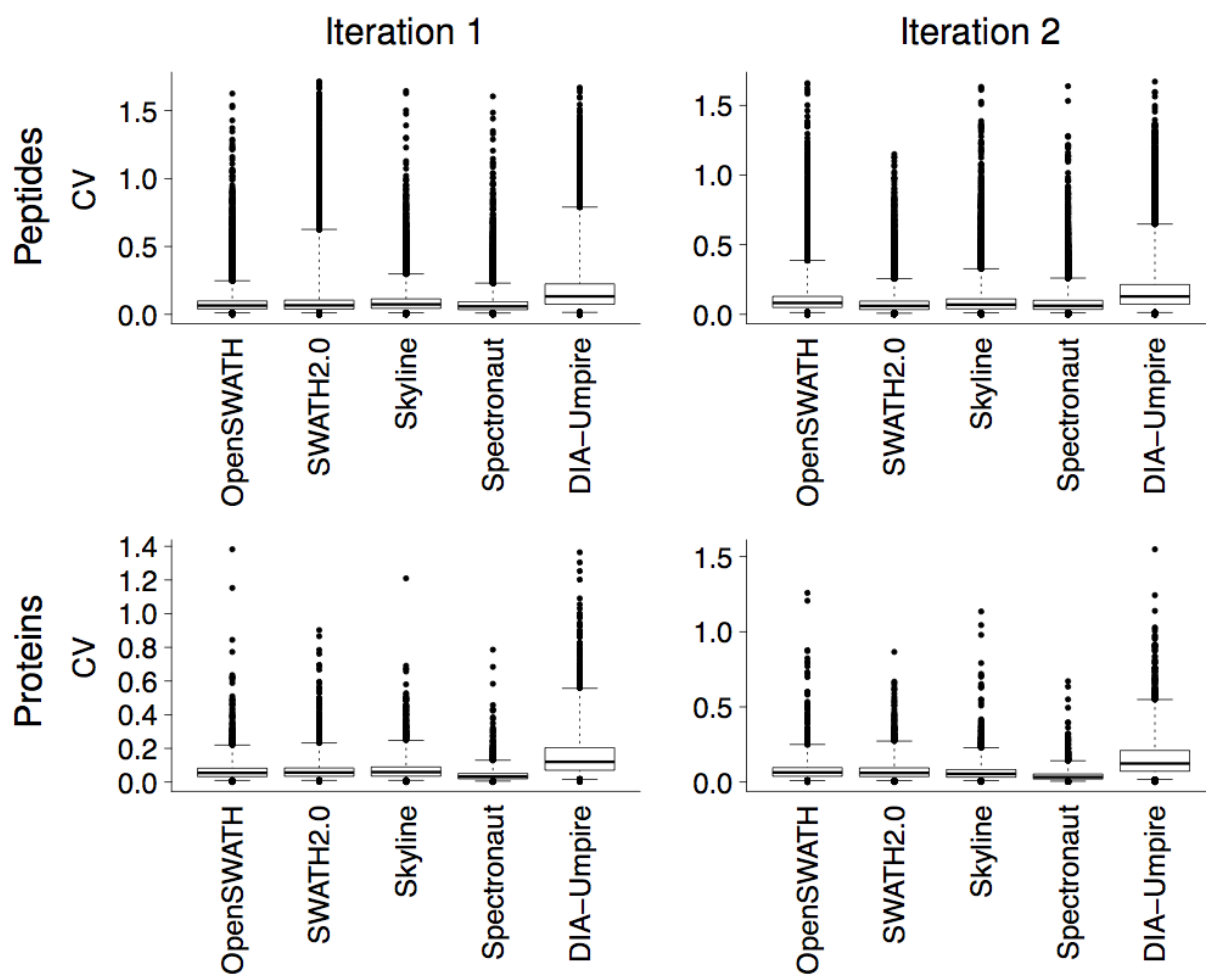

**Supplementary Figure 5.D:** Coefficients of Variance (CVs) between technical replicates for human proteins and peptides for HYE 124, TripleTOF 6600, 64var setup.

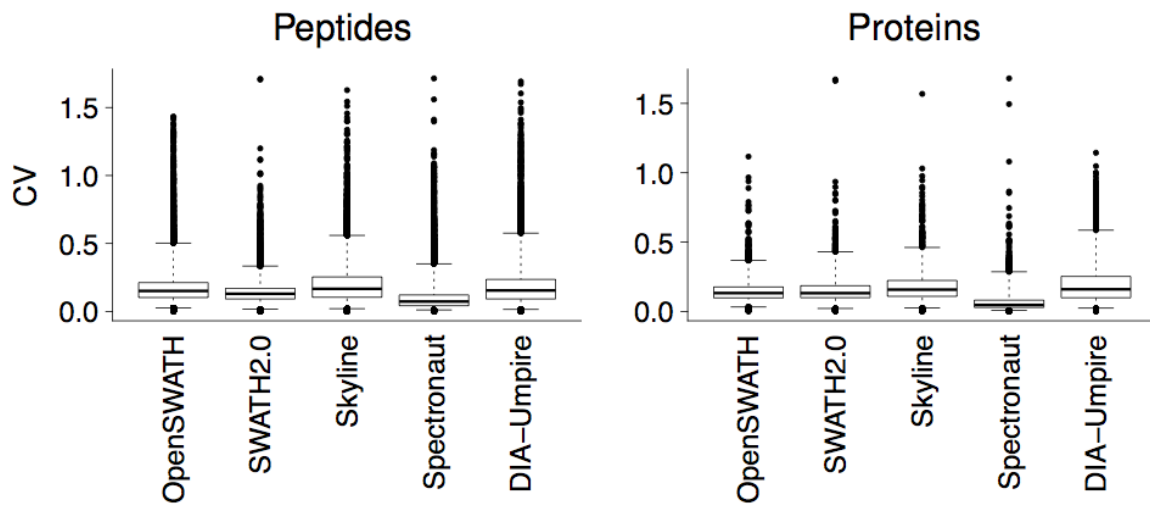

**Supplementary Figure 5.E:** Coefficients of Variance (CVs) between technical replicates for human proteins and peptides for HYE 110, TripleTOF 6600, 32fix setup.

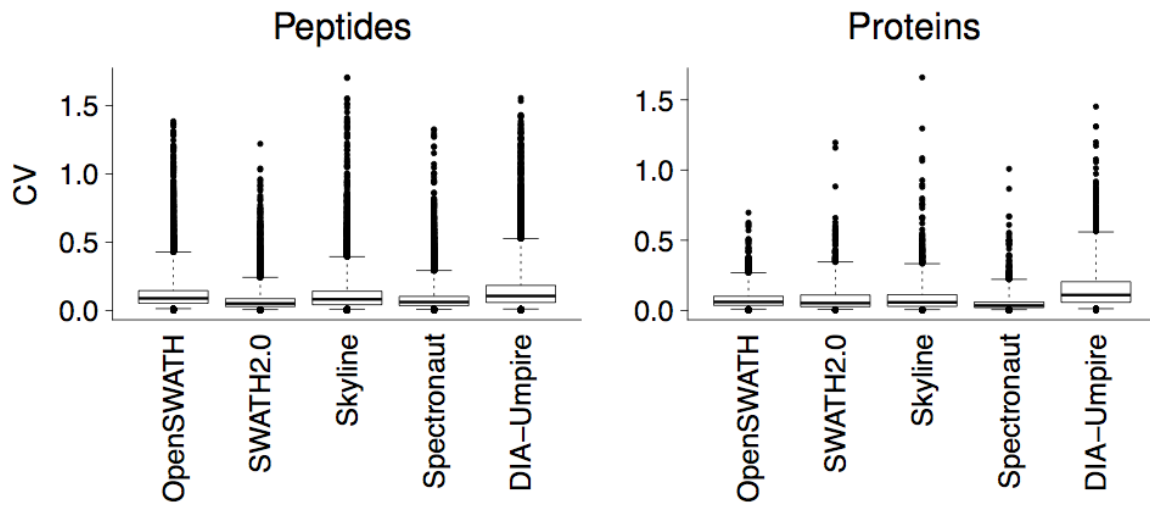

**Supplementary Figure 5.F:** Coefficients of Variance (CVs) between technical replicates for human proteins and peptides for HYE 110, TripleTOF 6600, 32var setup.

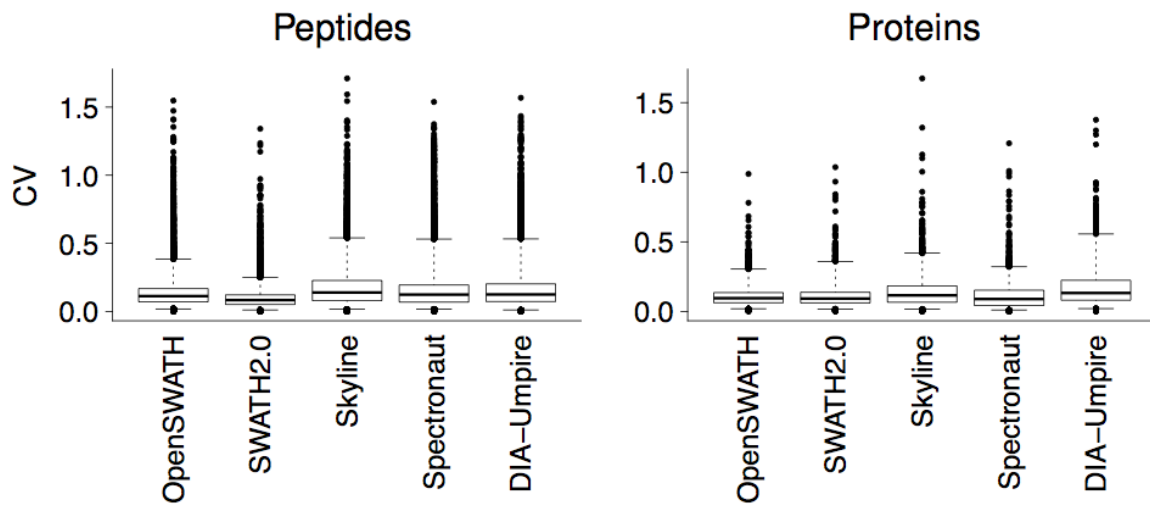

**Supplementary Figure 5.G:** Coefficients of Variance (CVs) between technical replicates for human proteins and peptides for HYE 110, TripleTOF 6600, 64fix setup.

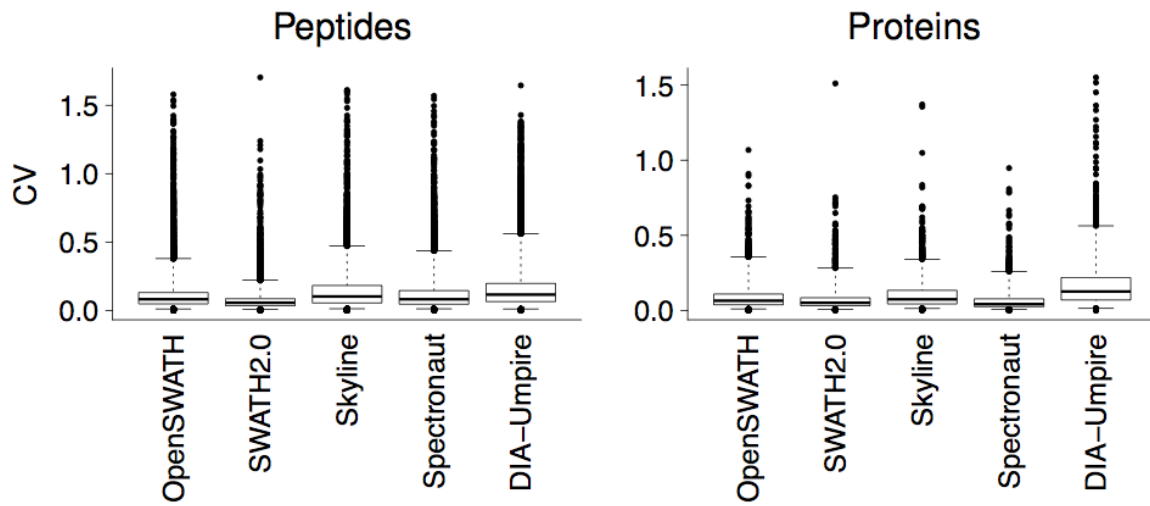

**Supplementary Figure 5.H:** Coefficients of Variance (CVs) between technical replicates for human proteins and peptides for HYE 110, TripleTOF 6600, 64var setup.

## Supplementary Figure 6. Precursor intensity correlation between the different datasets.

Datasets were compared pair-wise correlating total precursor intensities. Precursor intensities were calculated summing the intensity of all detected precursors ( $\text{FDR} < 0.01$ ) within a dataset (i.e. across all technical replicates of both sample A and B).

The following pages show precursor intensity correlations between the different workflows for:

- Supplementary Figure 6.A: HYE124, OpenSWATH
- Supplementary Figure 6.B: HYE124, SWATH 2.0
- Supplementary Figure 6.C: HYE124, Skyline
- Supplementary Figure 6.D: HYE124, Spectronaut
- Supplementary Figure 6.E: HYE124, DIA-Umpire
- Supplementary Figure 6.F: HYE110, OpenSWATH
- Supplementary Figure 6.G: HYE110, SWATH 2.0
- Supplementary Figure 6.H: HYE110, Skyline
- Supplementary Figure 6.I: HYE110, Spectronaut
- Supplementary Figure 6.J: HYE110, DIA-Umpire



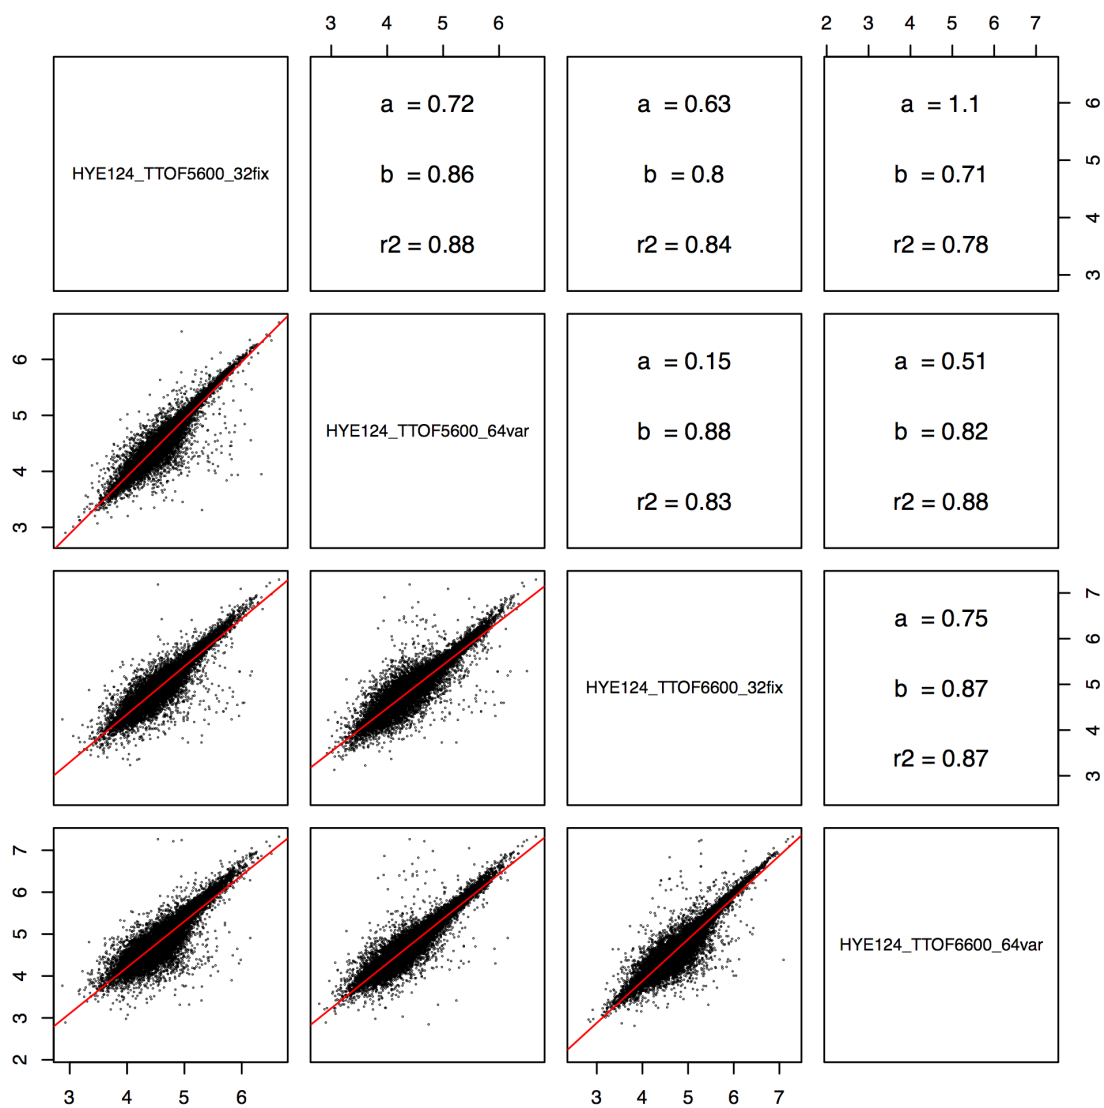

**Supplementary Figure 6.A:** Precursor intensity correlation between workflows for HYE124, OpenSWATH.

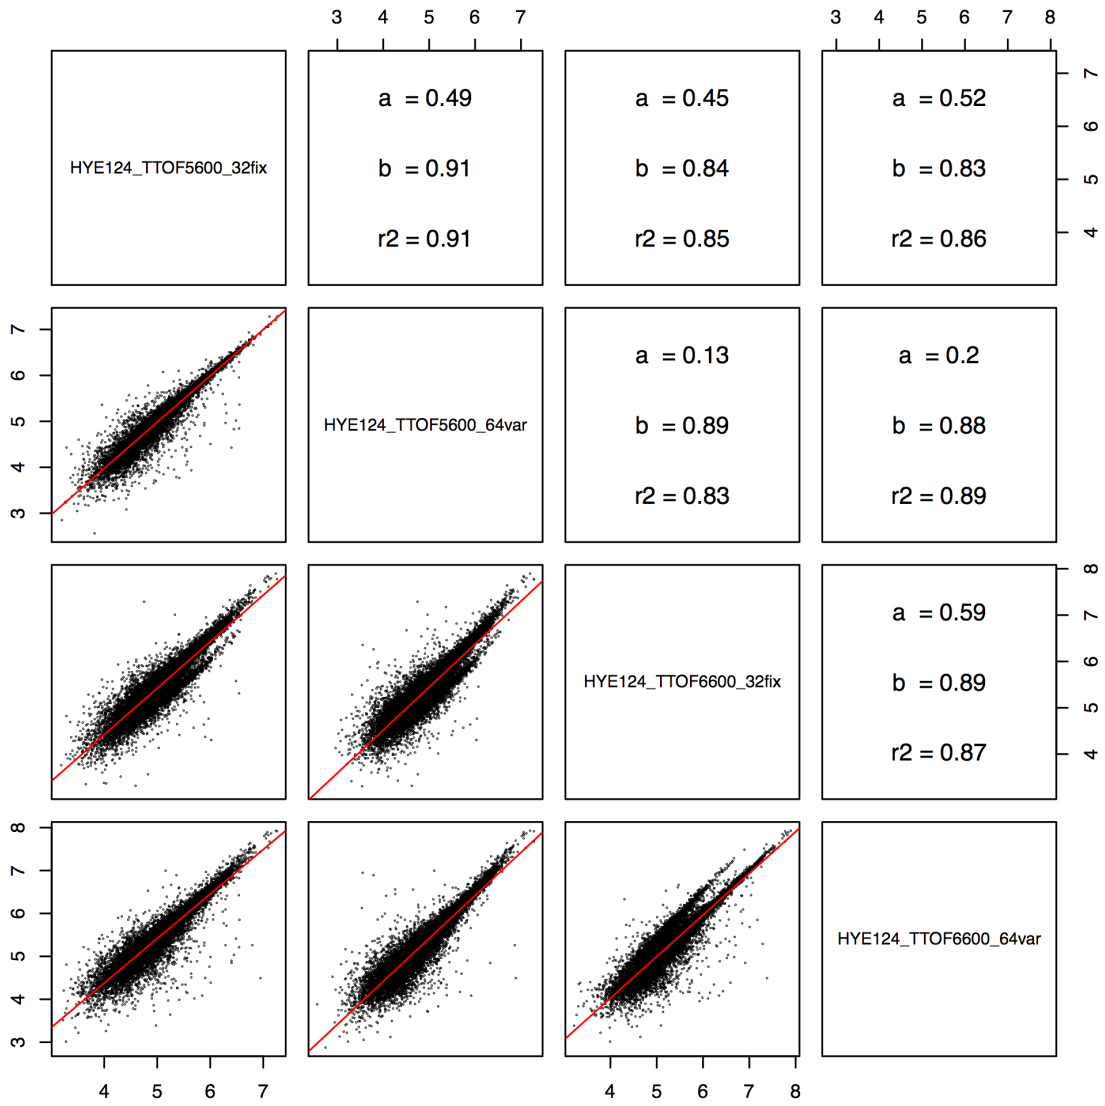

**Supplementary Figure 6.B:** Precursor intensity correlation between workflows for HYE124, SWATH 2.0.

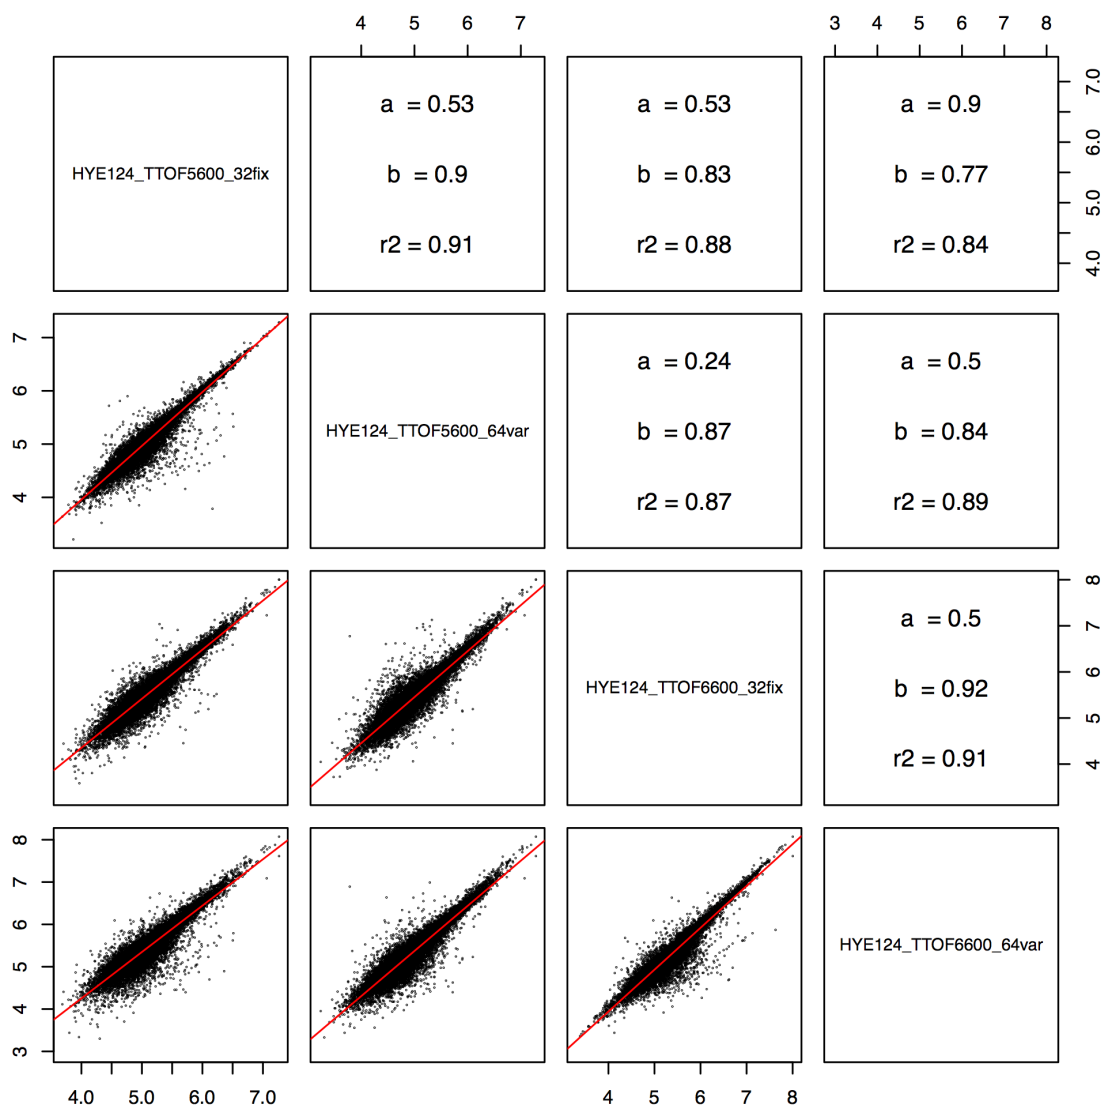

**Supplementary Figure 6.C:** Precursor intensity correlation between workflows for HYE124, Skyline.

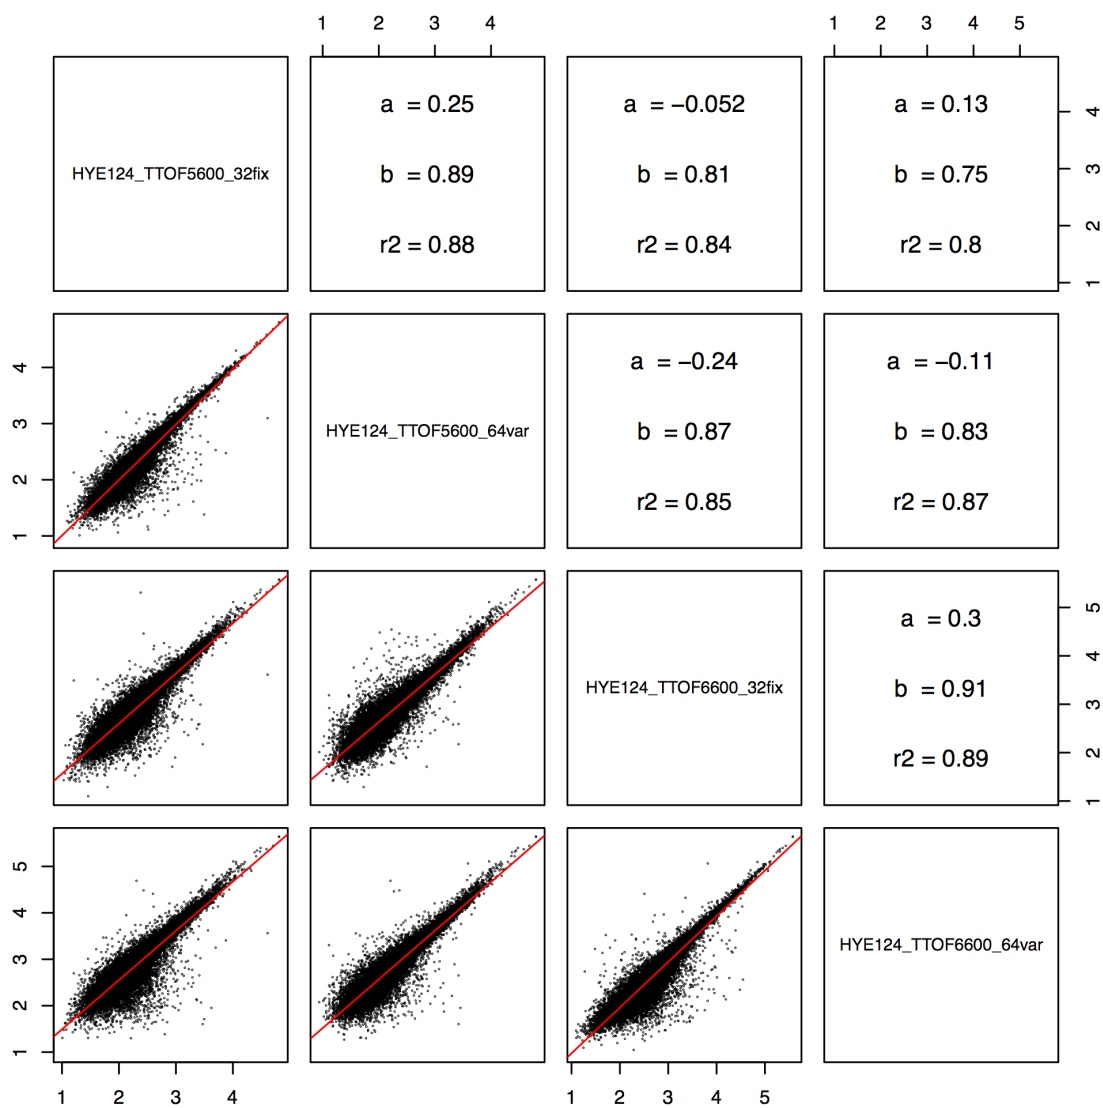

**Supplementary Figure 6.D:** Precursor intensity correlation between workflows for HYE124, Spectronaut.

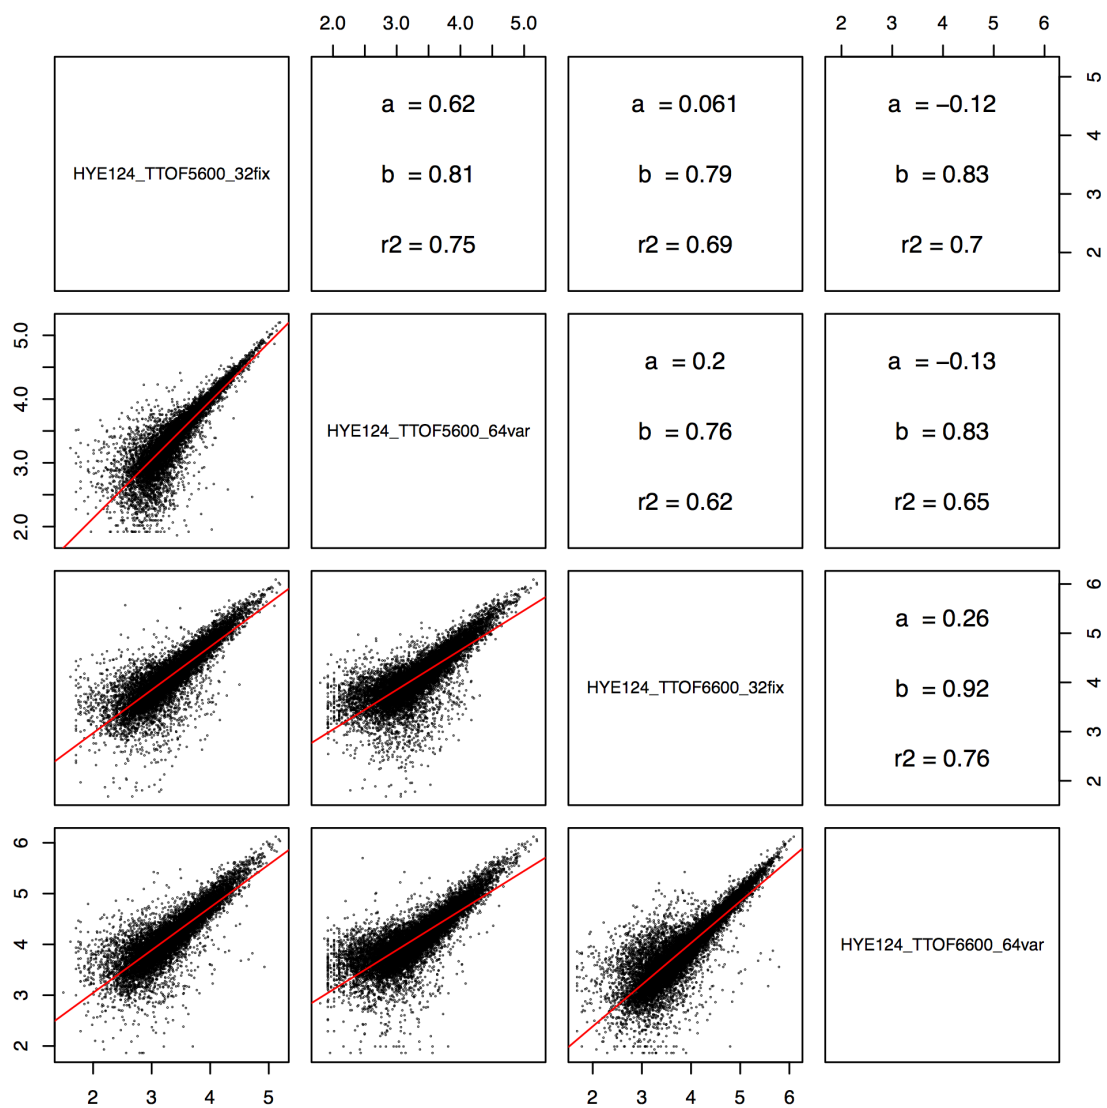

**Supplementary Figure 6.E:** Precursor intensity correlation between workflows for HYE124, DIA-Umpire.

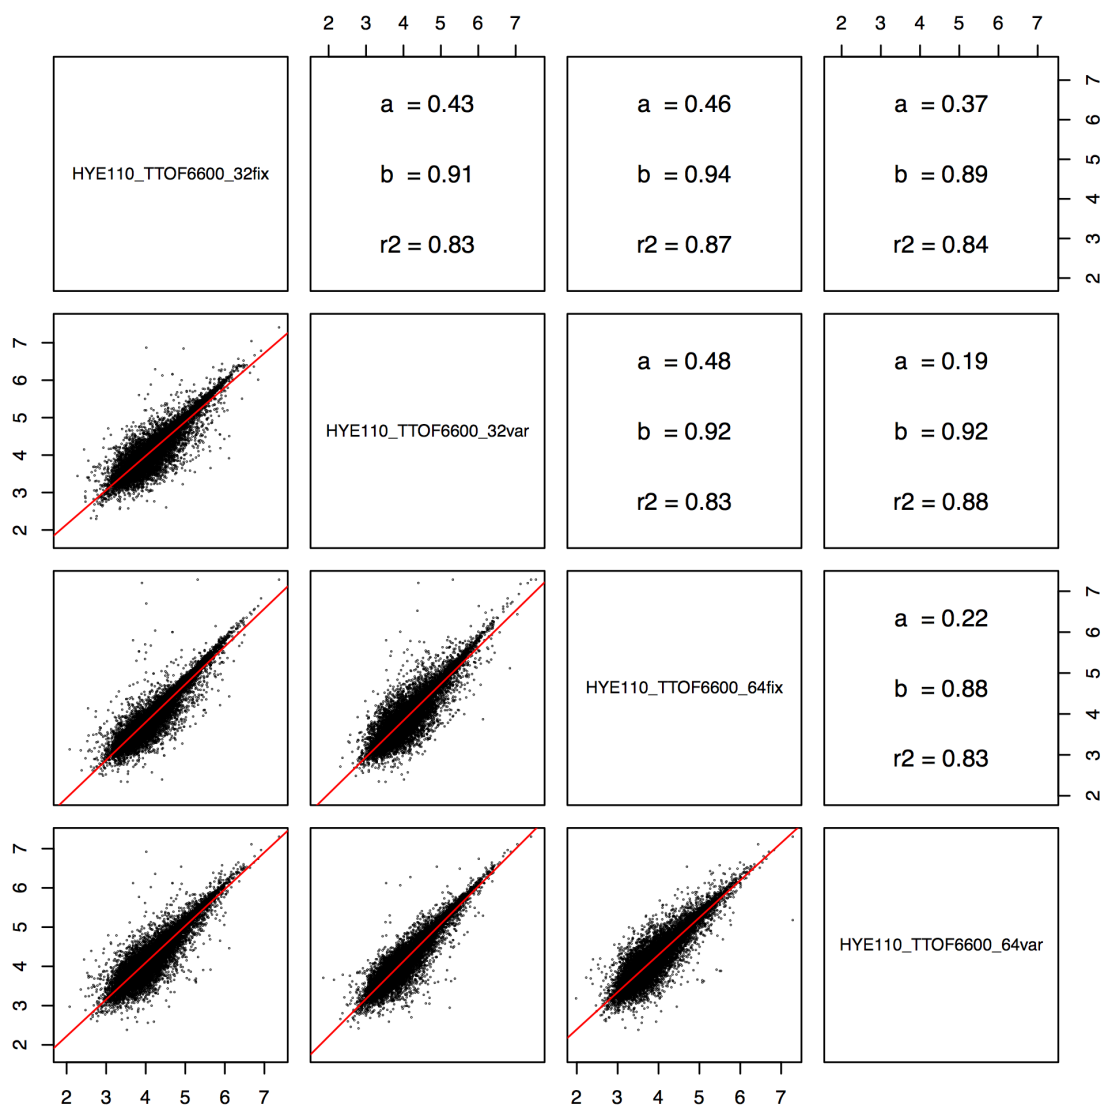

**Supplementary Figure 6.F:** Precursor intensity correlation between workflows for HYE110, OpenSWATH.

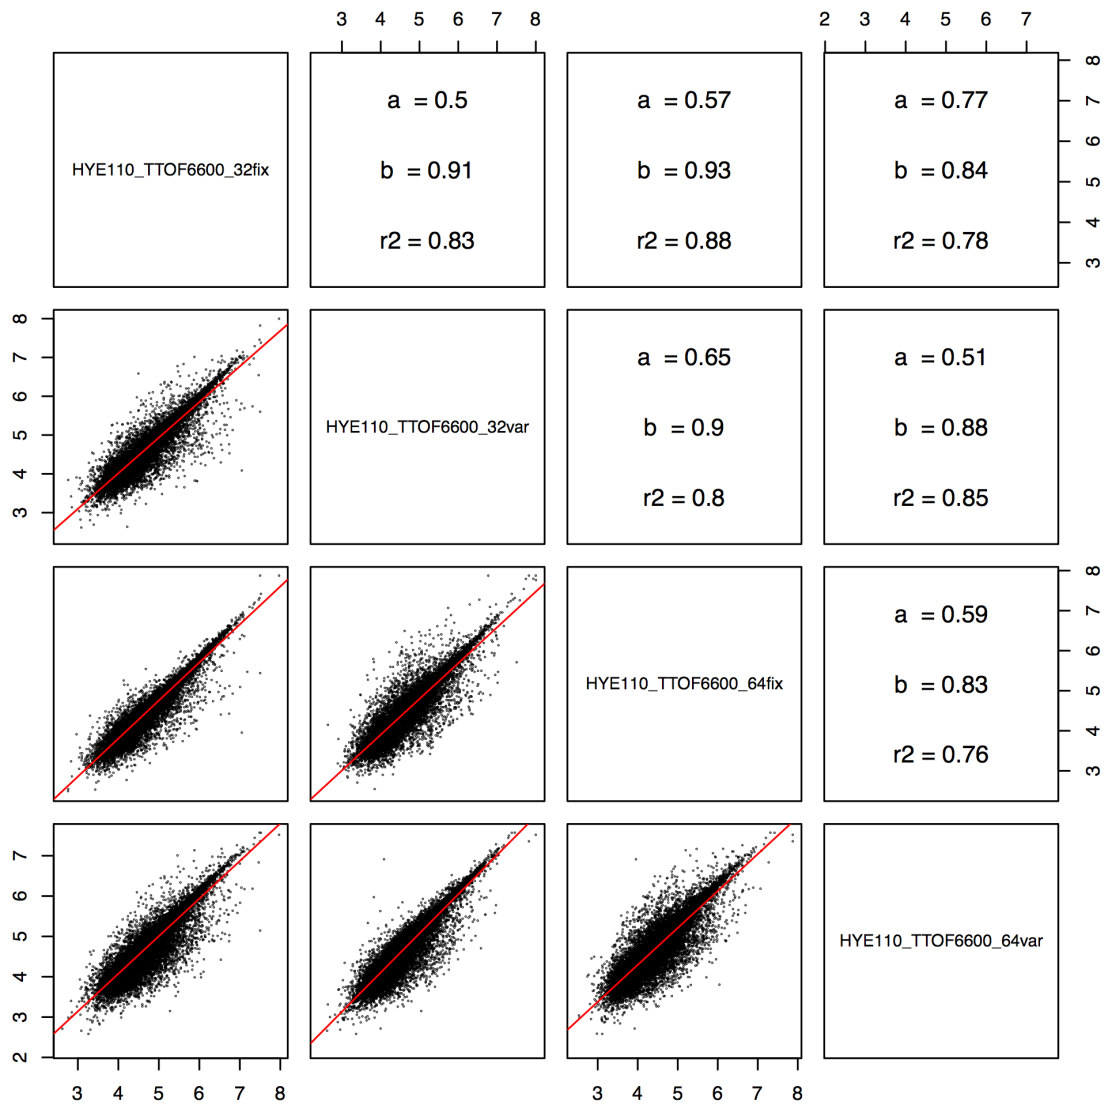

**Supplementary Figure 6.G:** Precursor intensity correlation between workflows for HYE110, SWATH 2.0.

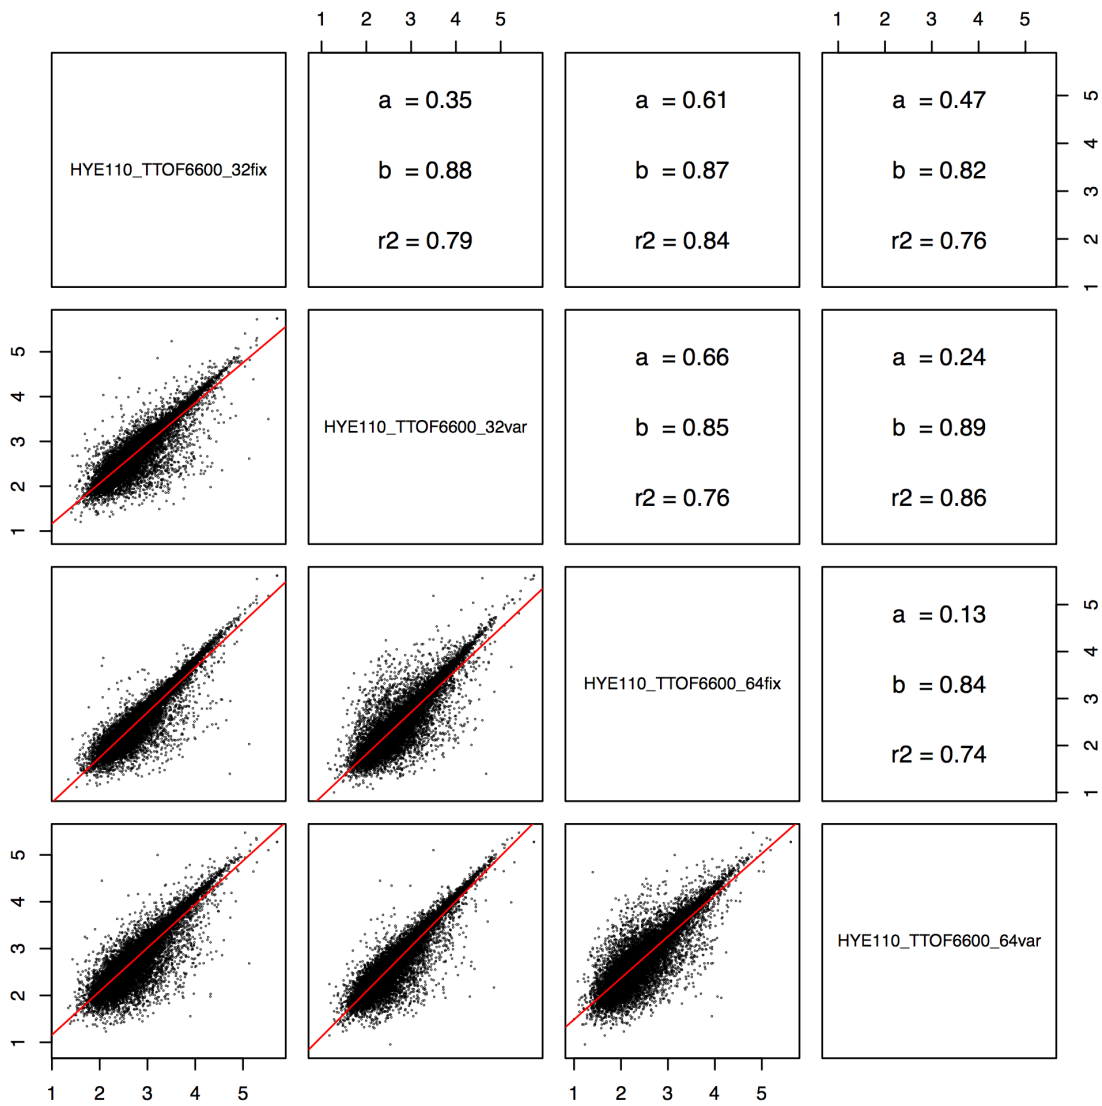

**Supplementary Figure 6.H:** Precursor intensity correlation between workflows for HYE110, Skyline.



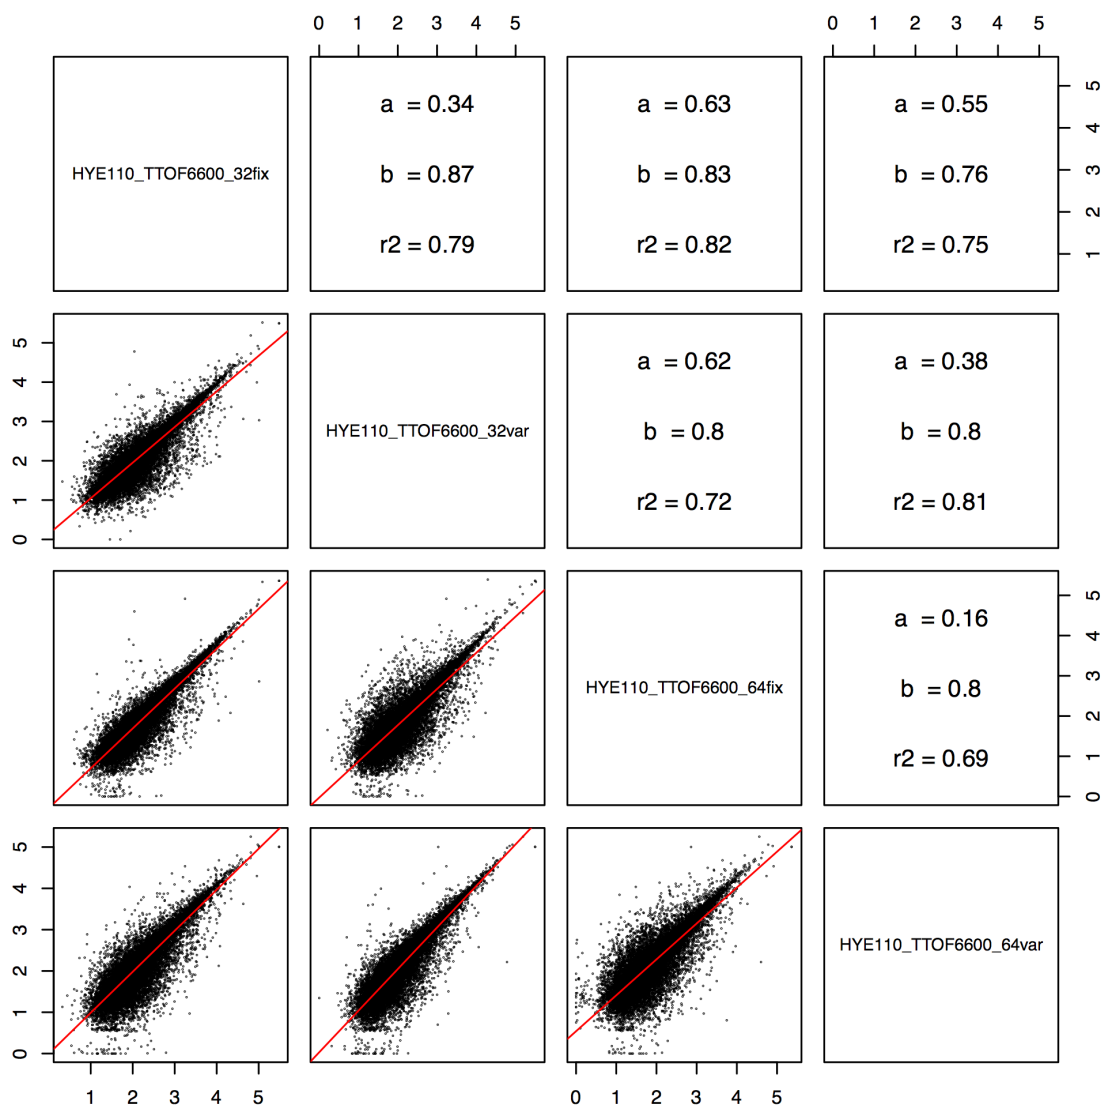

**Supplementary Figure 6.I:** Precursor intensity correlation between workflows for HYE110, Spectronaut.

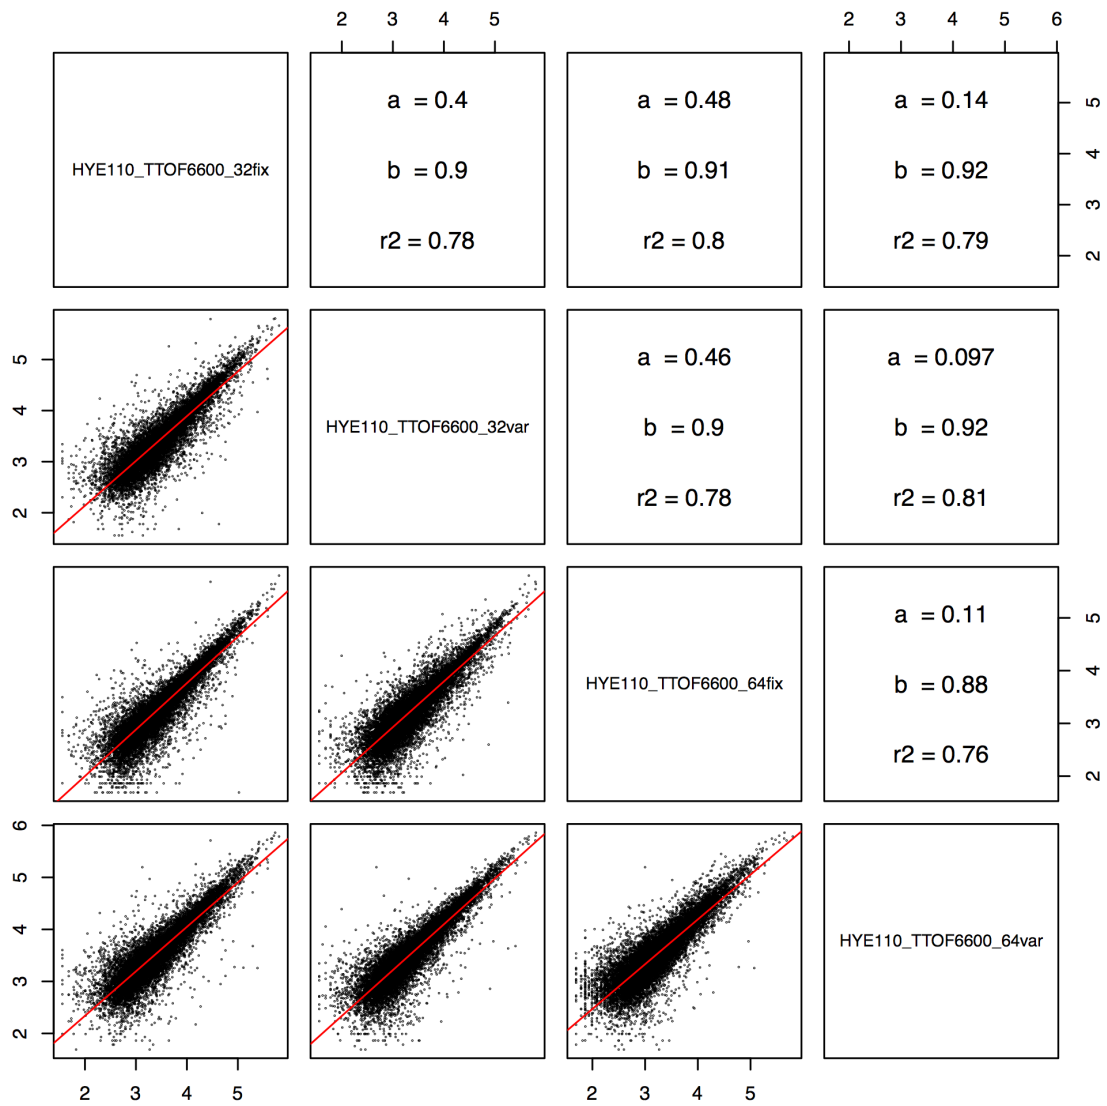

**Supplementary Figure 6.J:** Precursor intensity correlation between workflows for HYE110, DIA-Umpire.

## Supplementary Figure 7. LFQbench peptide level benchmarks.

Log-transformed ratios ( $\log_2(A/B)$ ) of peptides were plotted for each benchmarked software tool over the log-transformed scaled intensity of sample B. Dashed colored lines represent the expected  $\log_2(A/B)$  values for human, yeast, and E.coli peptides. Black dashed lines represent the local trend along the x-axis of experimental log-transformed ratios of each population (human, yeast, and E.coli). In case of sample HYE124, panel A shows both iterations for all software tools, and panel B shows the  $\log_2(A/B)$  of the averages between technical replicates of A and B for E.coli peptides in the lowest intensity tertile. Boxes represent 25% and 75% percentiles, whiskers cover data points between 1% and 99% percentiles.

Intensities reported by each software tool were scaled to SWATH 2.0 intensity scale using a linear model fixed in the origin. Intensities of multiply charged precursors were summed up, and averaged between technical replicates of each sample.

The following pages show LFQbench peptide level benchmarks for:

- Supplementary Figure 7.A: HYE 124, TripleTOF 5600, 32fix setup
- Supplementary Figure 7.B: HYE 124, TripleTOF 5600, 64var setup
- Supplementary Figure 7.C: HYE 124, TripleTOF 6600, 32fix setup
- Supplementary Figure 7.D: HYE 124, TripleTOF 6600, 64var setup
- Supplementary Figure 7.E: HYE 110, TripleTOF 6600, 32fix setup
- Supplementary Figure 7.F: HYE 110, TripleTOF 6600, 32var setup
- Supplementary Figure 7.G: HYE 110, TripleTOF 6600, 64fix setup
- Supplementary Figure 7.H: HYE 110, TripleTOF 6600, 64var setup

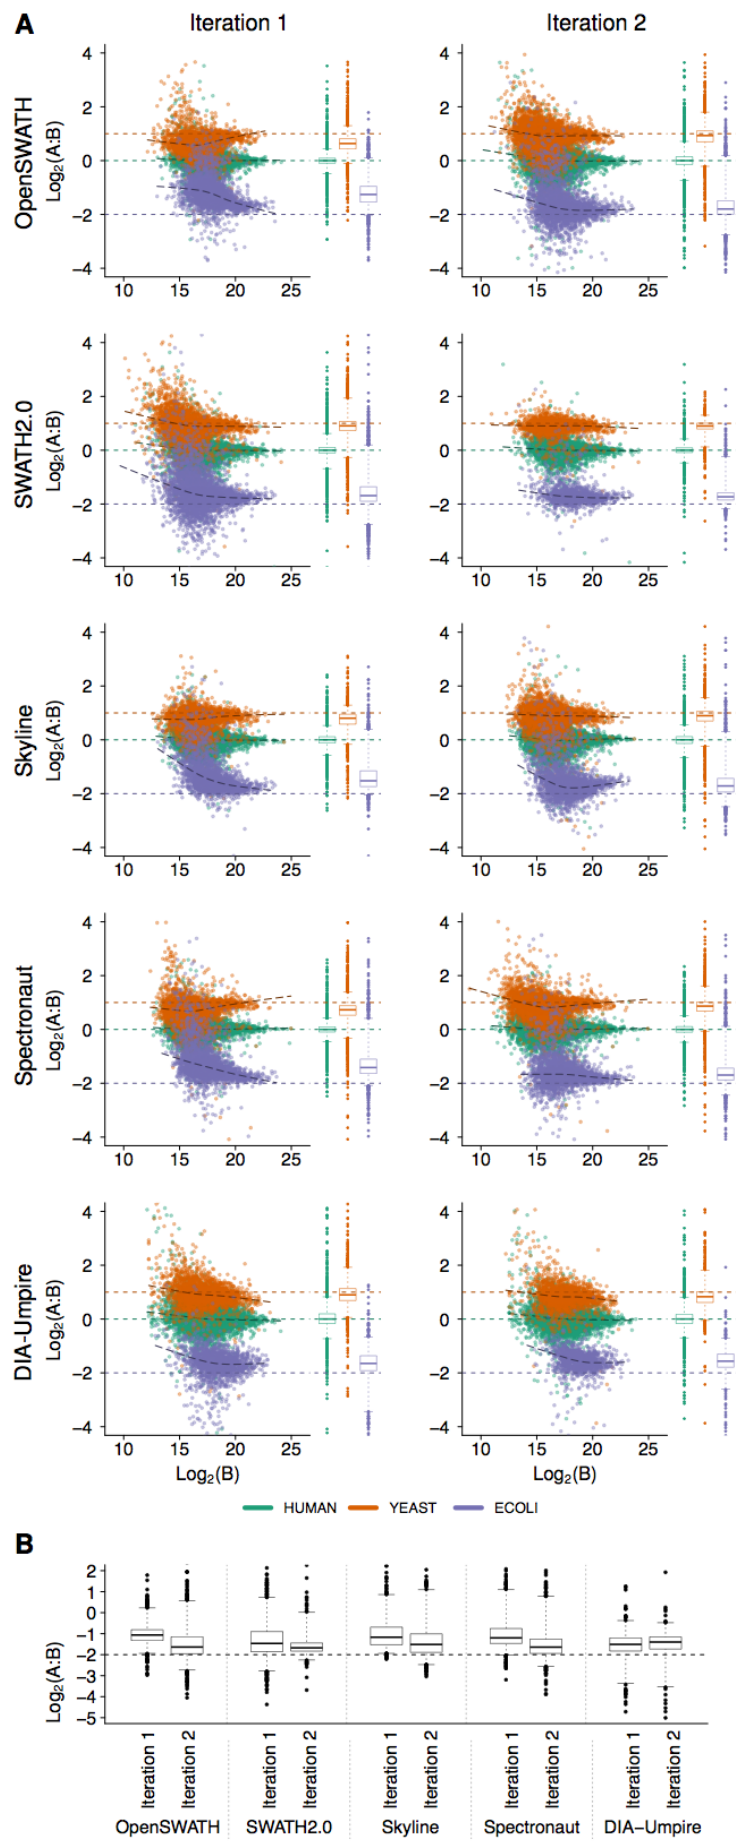

**Supplementary Figure 7.A:** LFQbench peptide level benchmarks for HYE 124, TripleTOF 5600, 32fix setup.

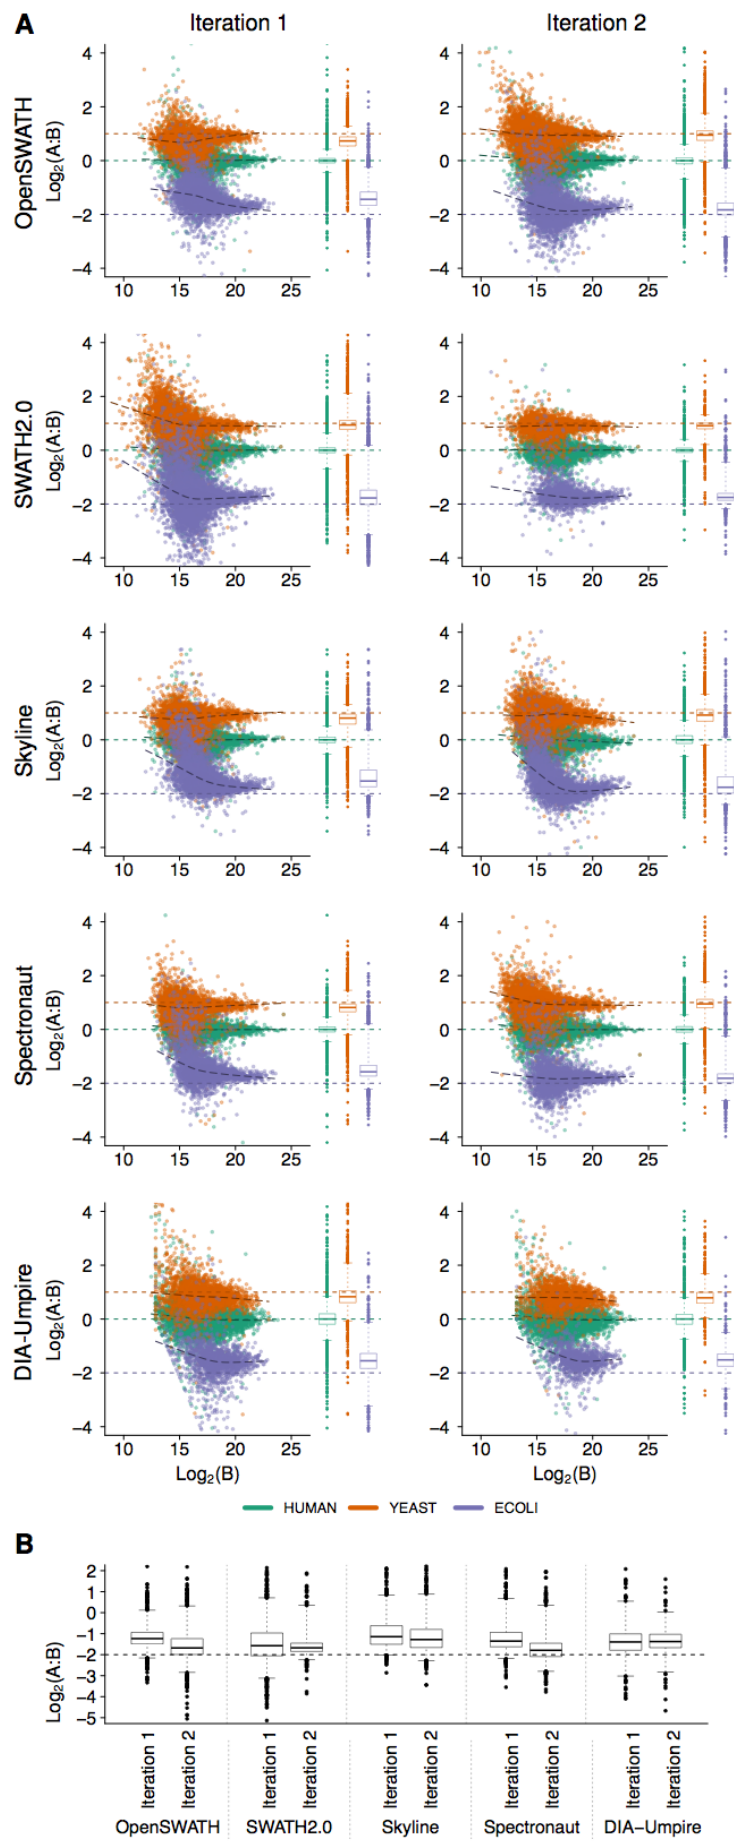

**Supplementary Figure 7.B:** LFQbench peptide level benchmarks for HYE 124, TripleTOF 5600, 64var setup.

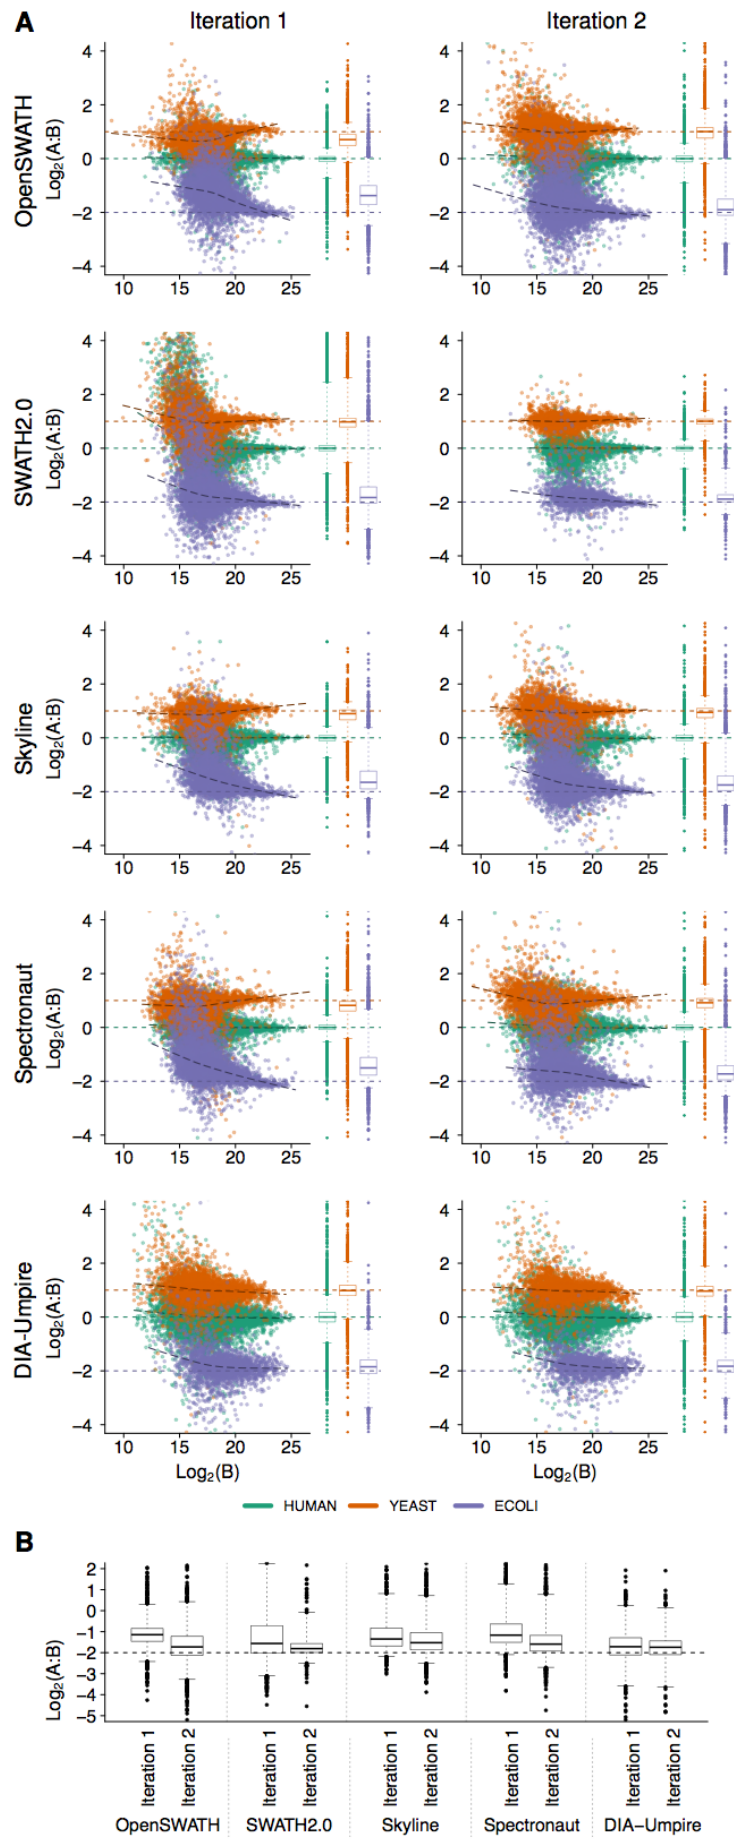

**Supplementary Figure 7.C:** LFQbench peptide level benchmarks for HYE 124, TripleTOF 6600, 32fix setup.

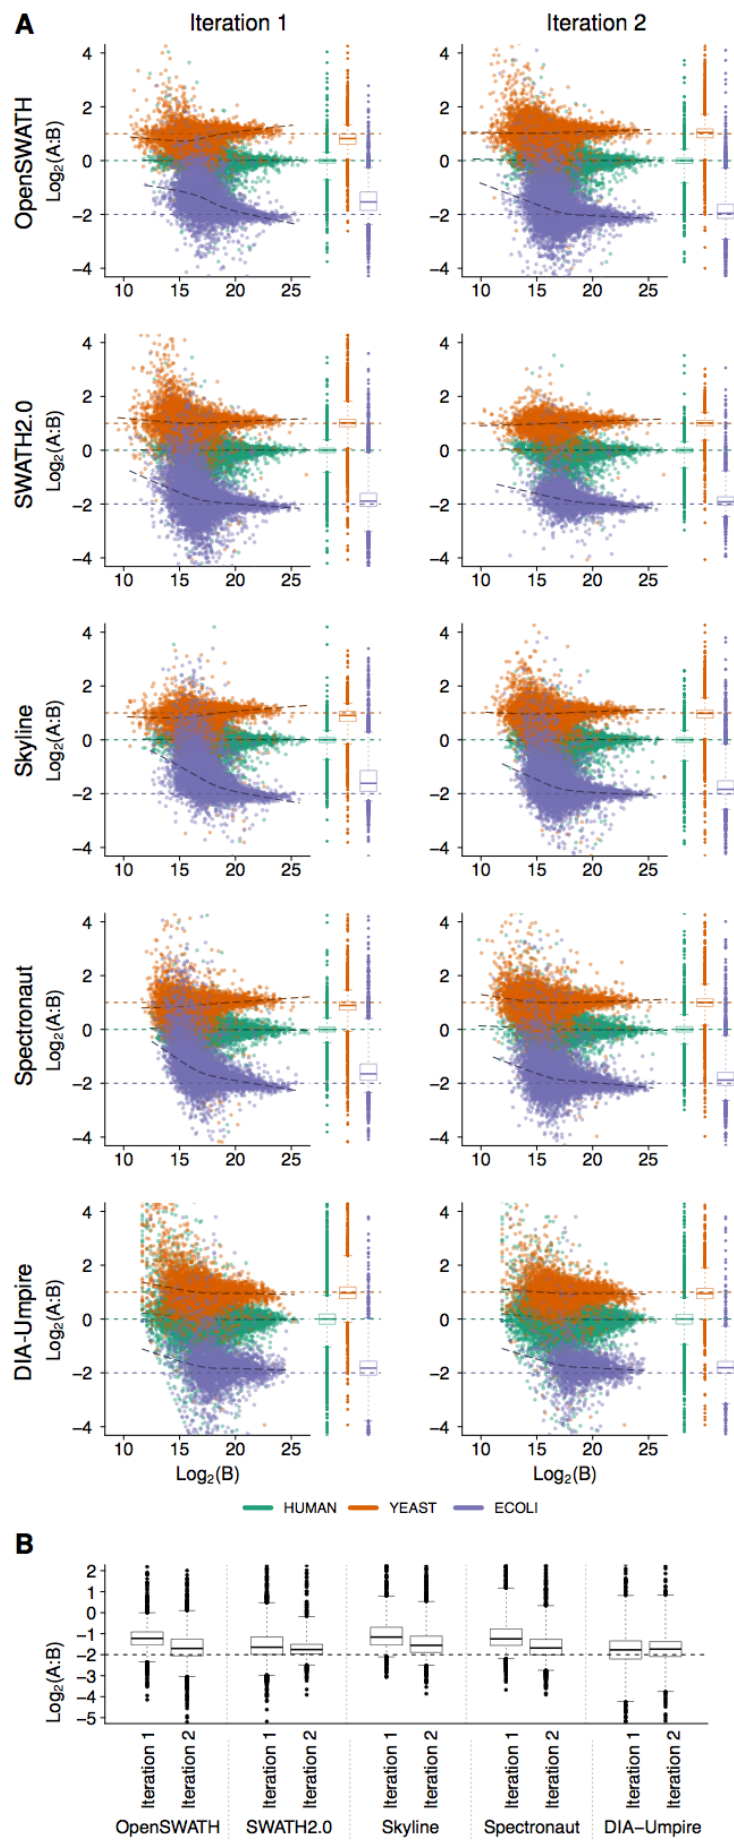

**Supplementary Figure 7.D:** LFQbench peptide level benchmarks for HYE 124, TripleTOF 6600, 64var setup.

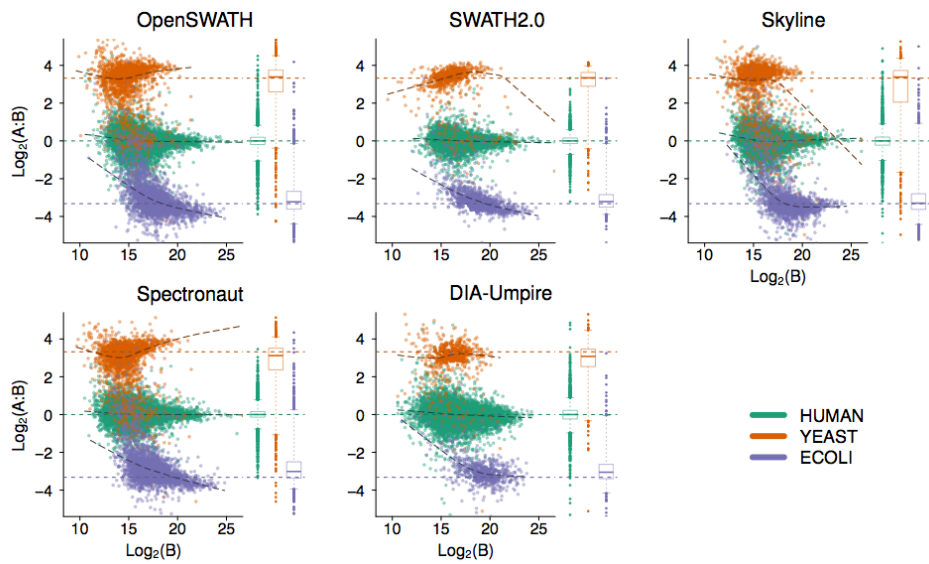

**Supplementary Figure 7.E:** LFQbench peptide level benchmarks for HYE 110, TripleTOF 6600, 32fix setup.

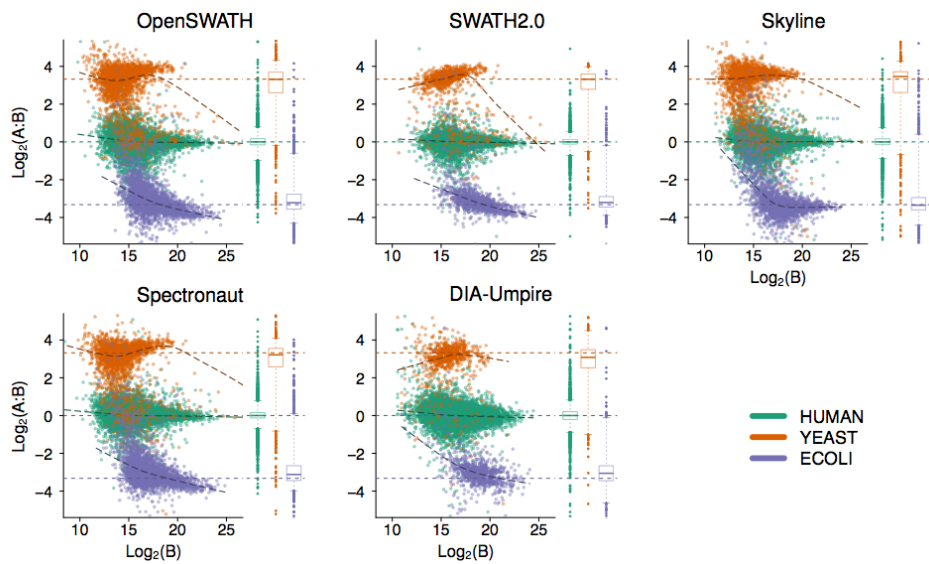

**Supplementary Figure 7.F:** LFQbench peptide level benchmarks for HYE 110, TripleTOF 6600, 32var setup.



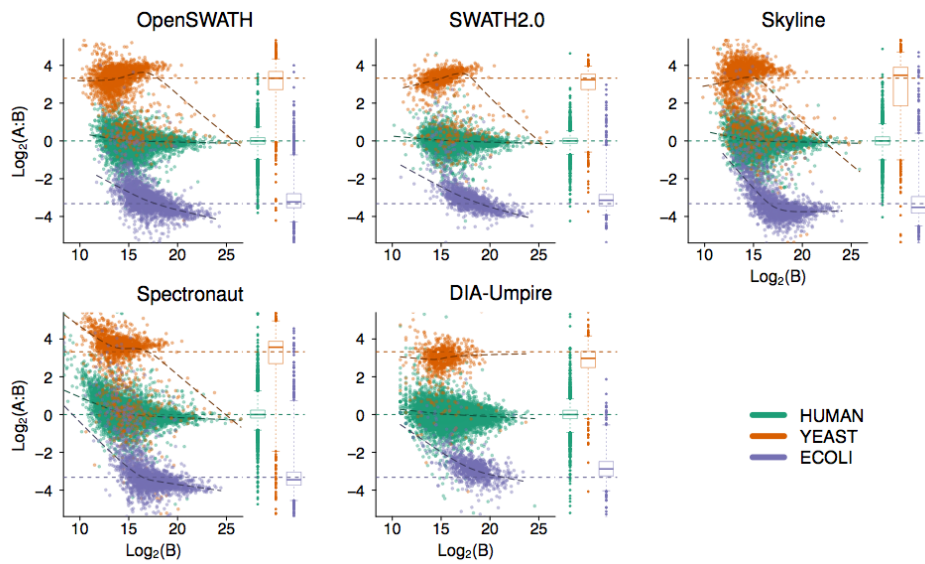

**Supplementary Figure 7.G:** LFQbench peptide level benchmarks for HYE 110, TripleTOF 6600, 64fix setup.

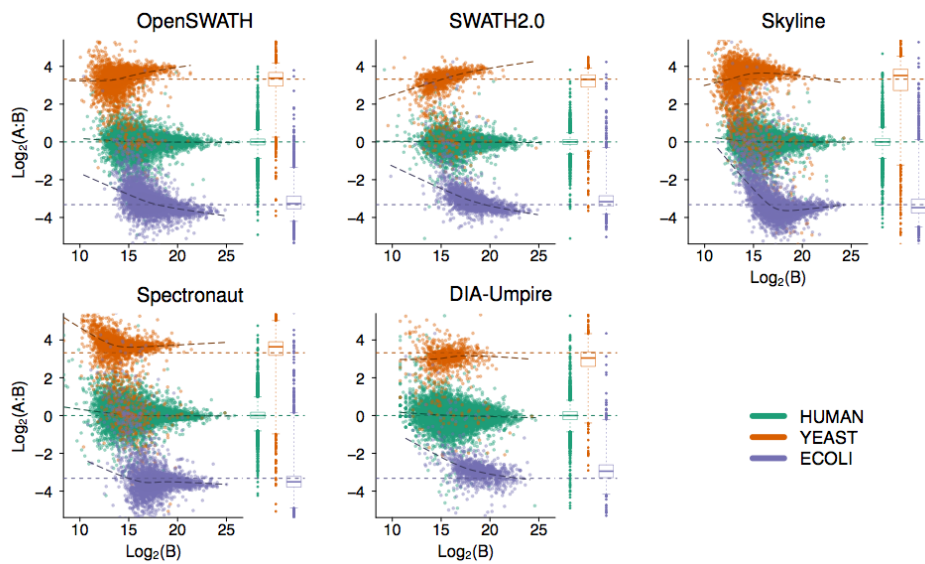

**Supplementary Figure 7.H:** LFQbench peptide level benchmarks for HYE 110, TripleTOF 6600, 64var setup.

## Supplementary Figure 8. LFQbench protein level benchmarks.

Log-transformed ratios ( $\log_2(A/B)$ ) of proteins were plotted for each benchmarked software tool over the log-transformed scaled intensity of sample B. Dashed colored lines represent the expected  $\log_2(A/B)$  values for human, yeast, and E.coli peptides. Black dashed lines represent the local trend along the x-axis of experimental log-transformed ratios of each population (human, yeast, and E.coli). In case of sample HYE124, panel A shows both iterations for all software tools, and panel B shows the  $\log_2(A/B)$  of the averages between technical replicates of A and B for E.coli peptides in the lowest intensity tertile. Boxes represent 25% and 75% percentiles, whiskers cover data points between 1% and 99% percentiles.

Intensities of multiply charged precursors were summed up, and averaged between technical replicates of each sample. Protein quantities were estimated in each technical replicate by the average of the most 3 intense peptides reported for each protein. Single hit proteins (a single peptide detected in a protein) and proteins detected in less than two injections in both samples A and B were discarded. The protein intensities of each software tool were then scaled to SWATH 2.0 intensity scale using a linear model fixed in the origin.

The following pages show LFQbench protein level benchmarks for:

- Supplementary Figure 8.A: HYE 124, TripleTOF 5600, 32fix setup
- Supplementary Figure 8.B: HYE 124, TripleTOF 5600, 64var setup
- Supplementary Figure 8.C: HYE 124, TripleTOF 6600, 32fix setup
- Supplementary Figure 8.D: HYE 124, TripleTOF 6600, 64var setup
- Supplementary Figure 8.E: HYE 110, TripleTOF 6600, 32fix setup
- Supplementary Figure 8.F: HYE 110, TripleTOF 6600, 32var setup
- Supplementary Figure 8.G: HYE 110, TripleTOF 6600, 64fix setup
- Supplementary Figure 8.H: HYE 110, TripleTOF 6600, 64var setup

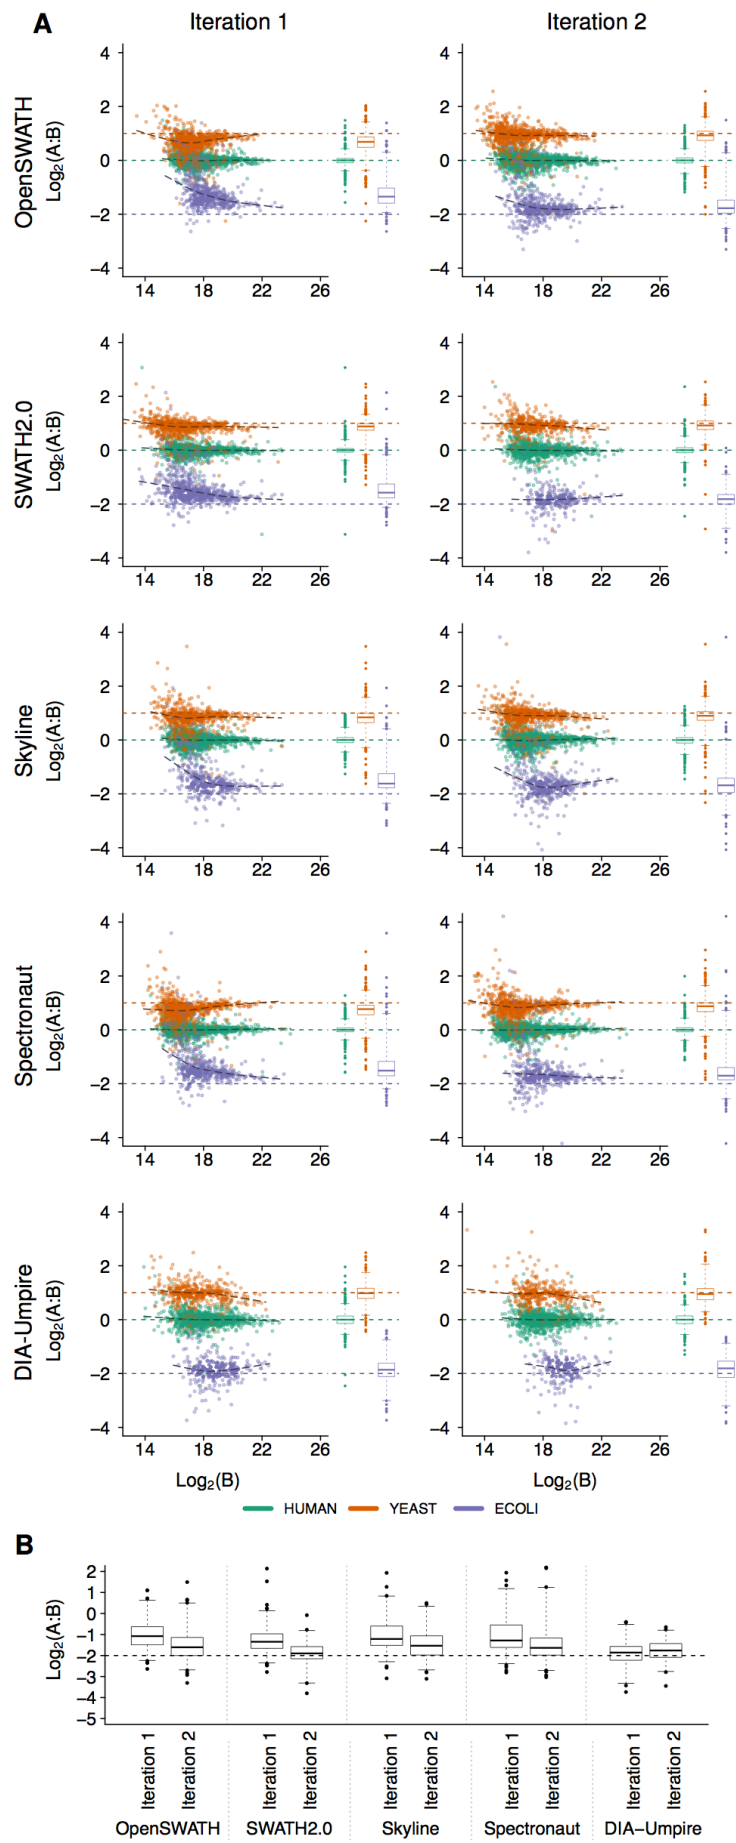

**Supplementary Figure 8.A:** LFQbench protein level benchmarks for HYE 124, TripleTOF 5600, 32fix setup.

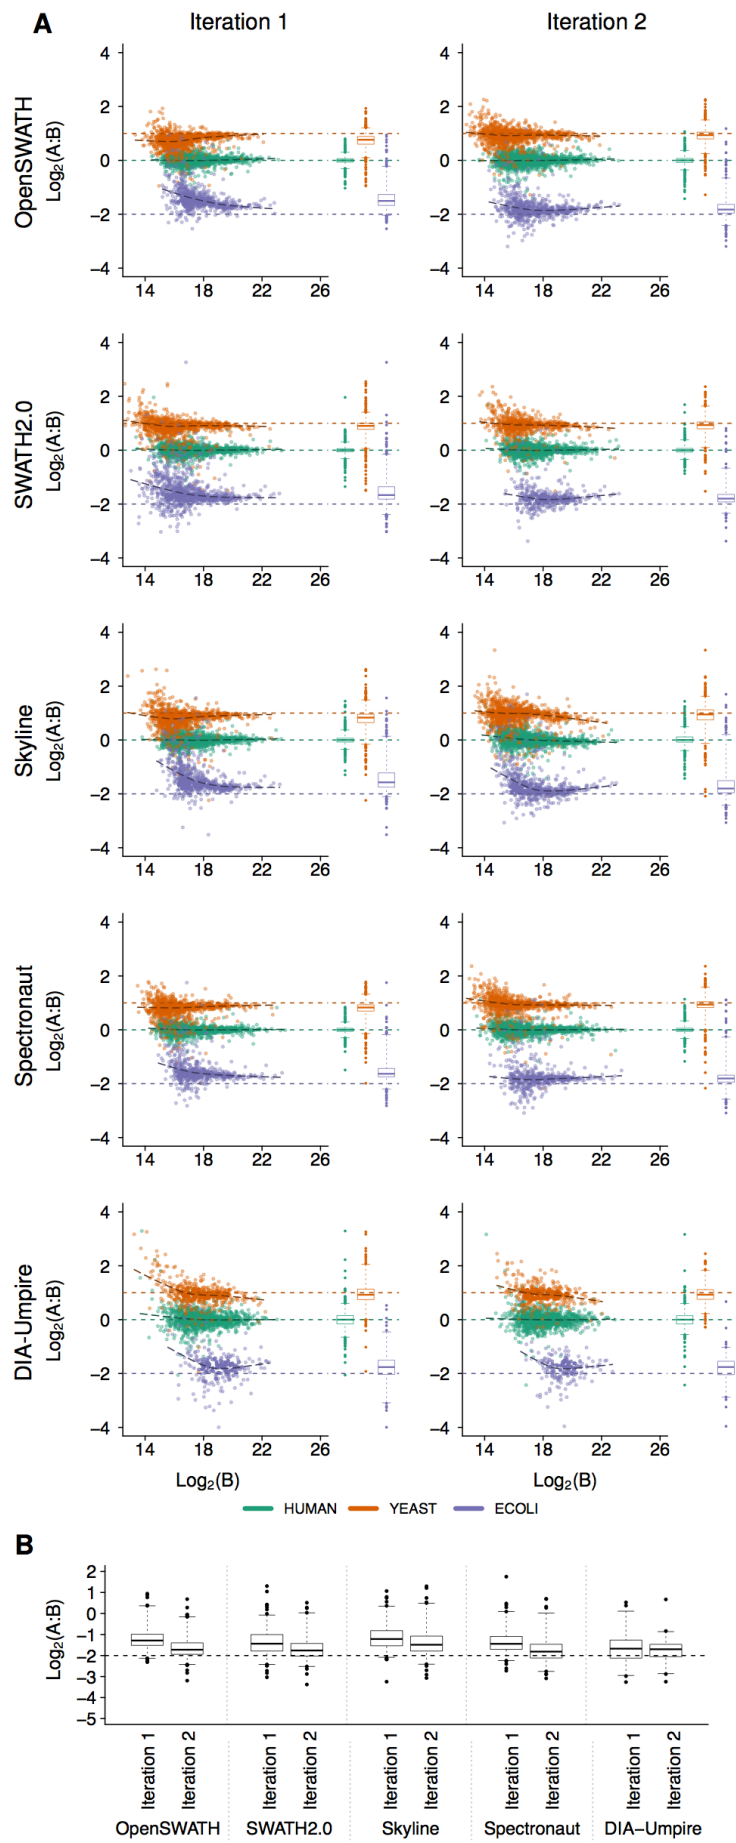

**Supplementary Figure 8.B:** LFQbench protein level benchmarks for HYE 124, TripleTOF 5600, 64var setup.

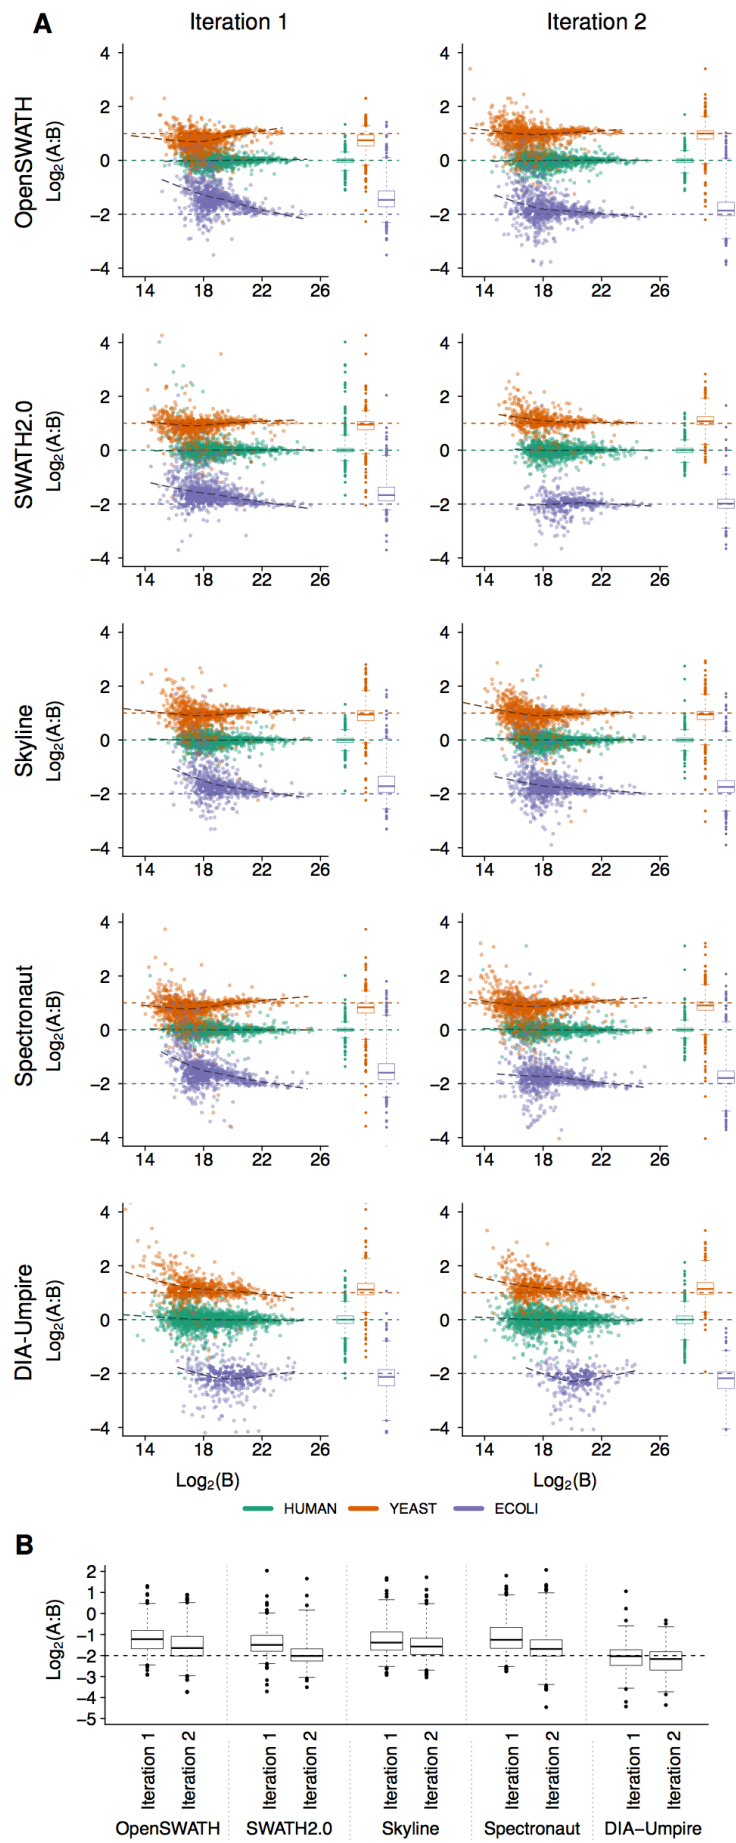

**Supplementary Figure 8.C:** LFQbench protein level benchmarks for HYE 124, TripleTOF 6600, 32fix setup.

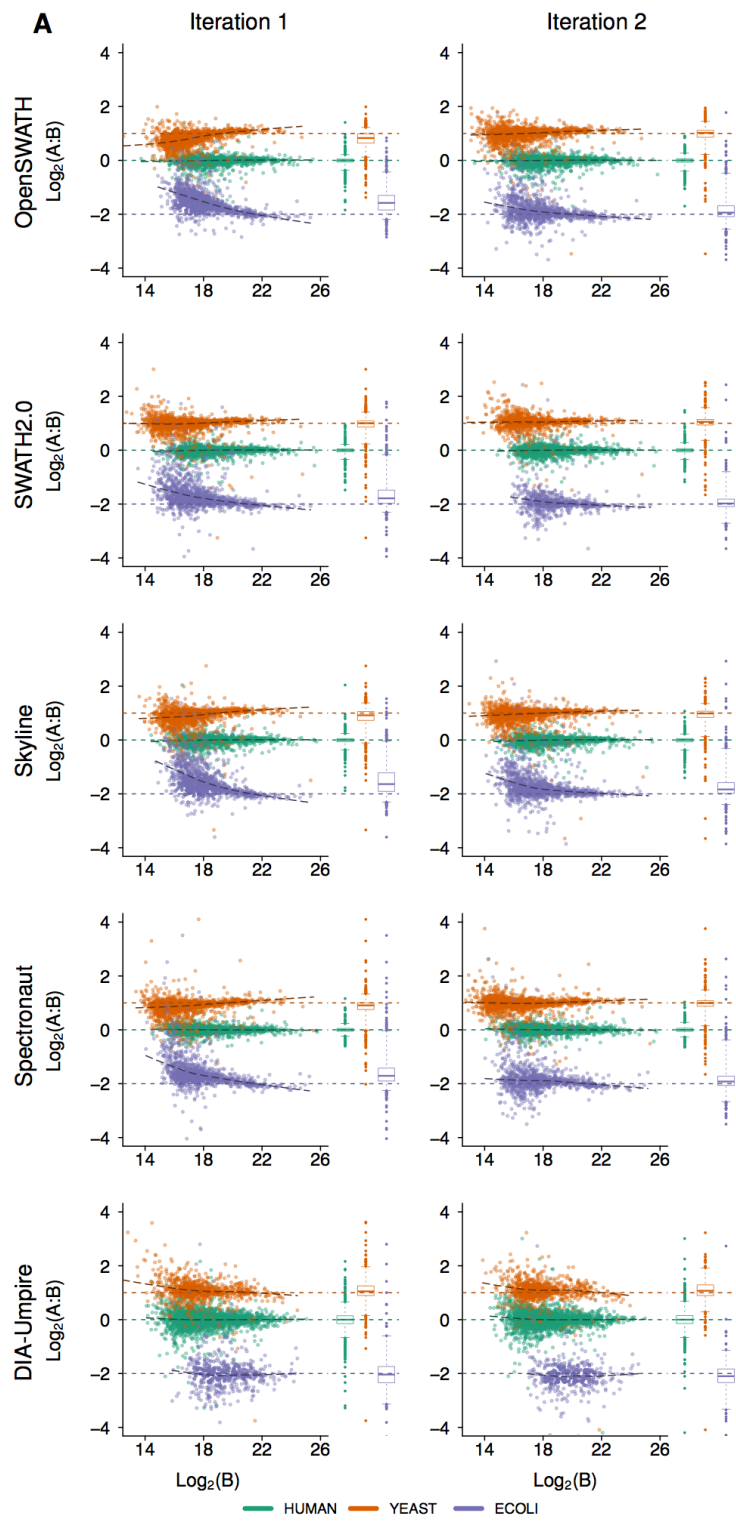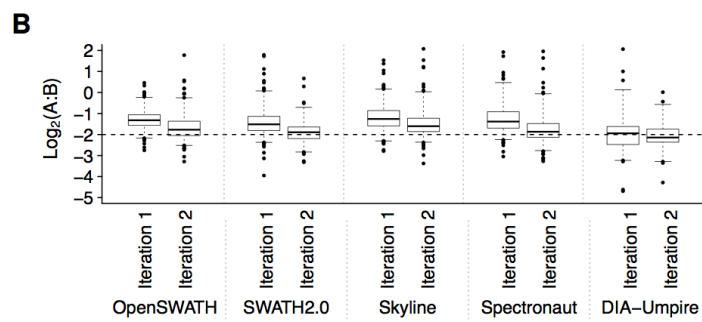

**Supplementary Figure 8.D:** LFQbench protein level benchmarks for HYE 124, TripleTOF 6600, 64var setup.

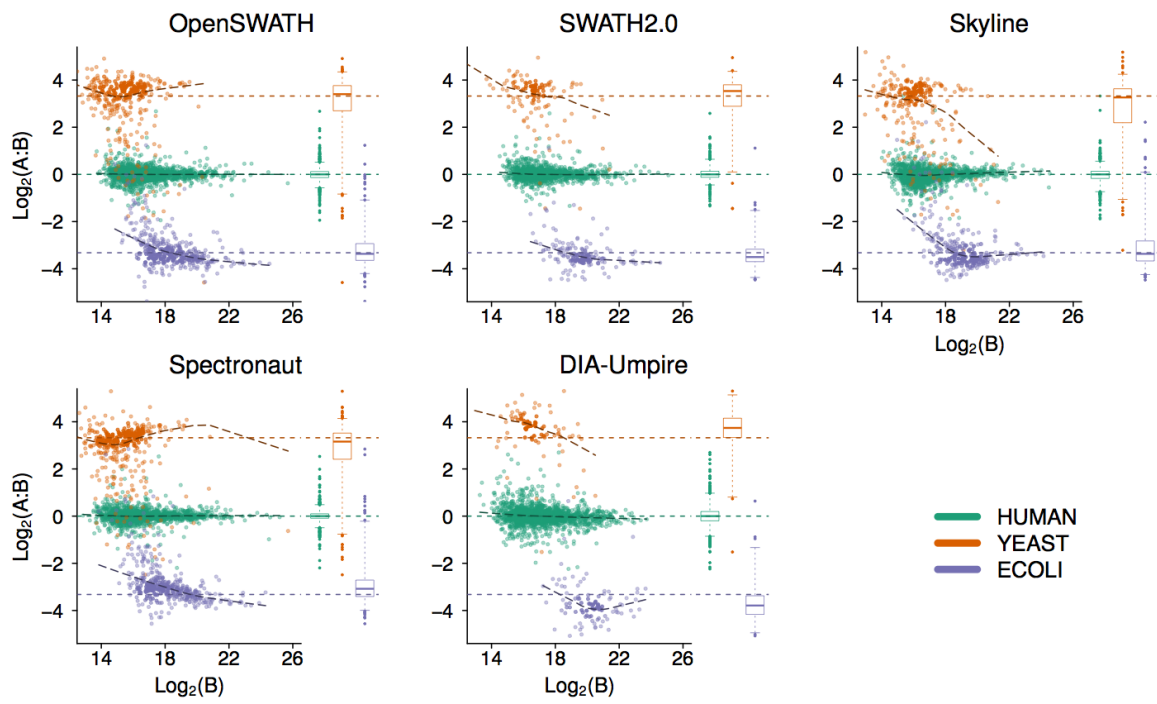

**Supplementary Figure 8.E:** LFQbench protein level benchmarks for HYE 110, TripleTOF 6600, 32fix setup.

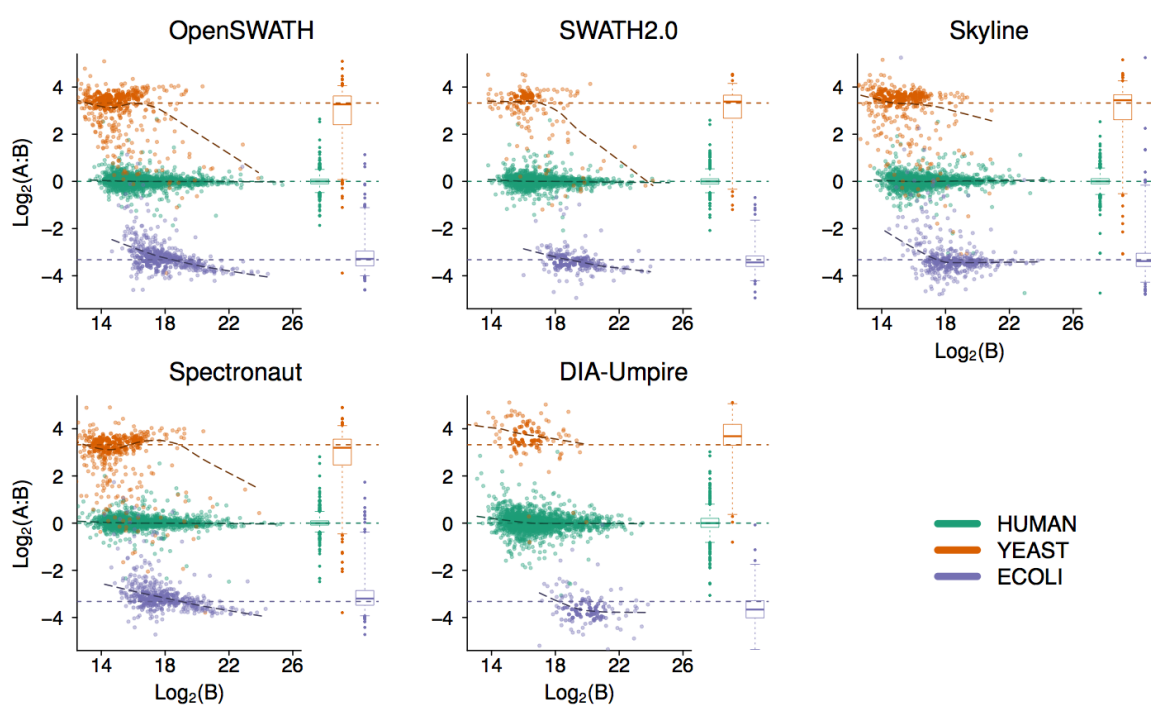

**Supplementary Figure 8.F:** LFQbench protein level benchmarks for HYE 110, TripleTOF 6600, 32var setup.



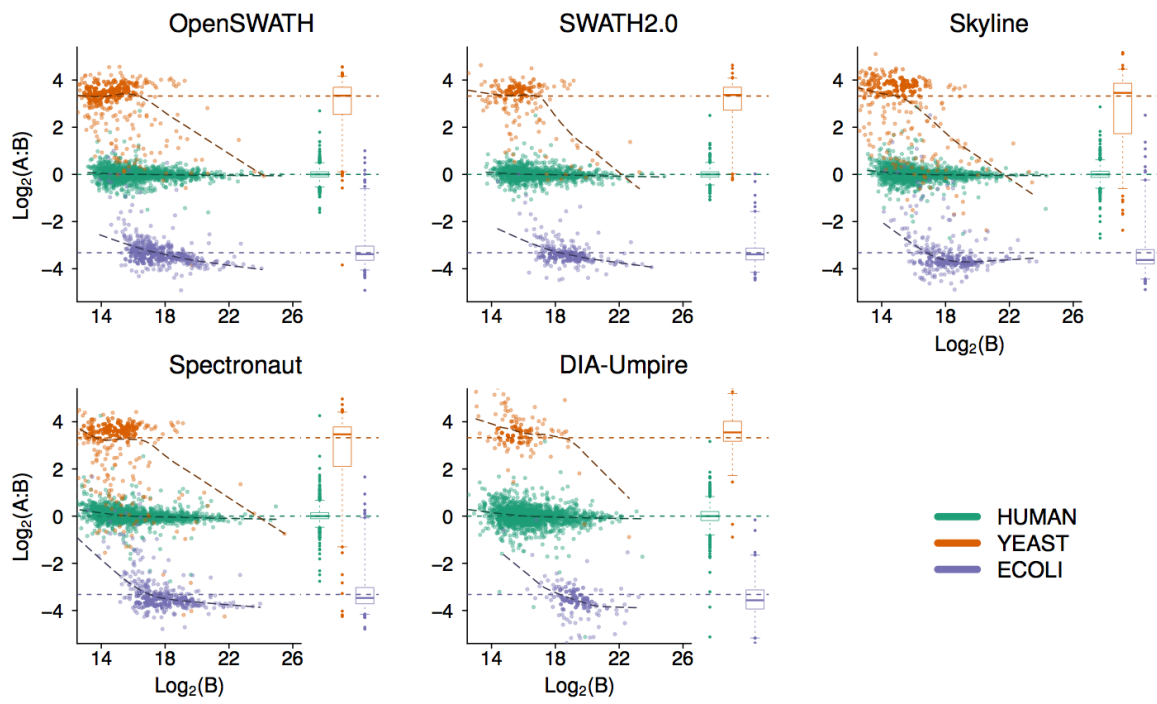

**Supplementary Figure 8.G:** LFQbench protein level benchmarks for HYE 110, TripleTOF 6600, 64fix setup.

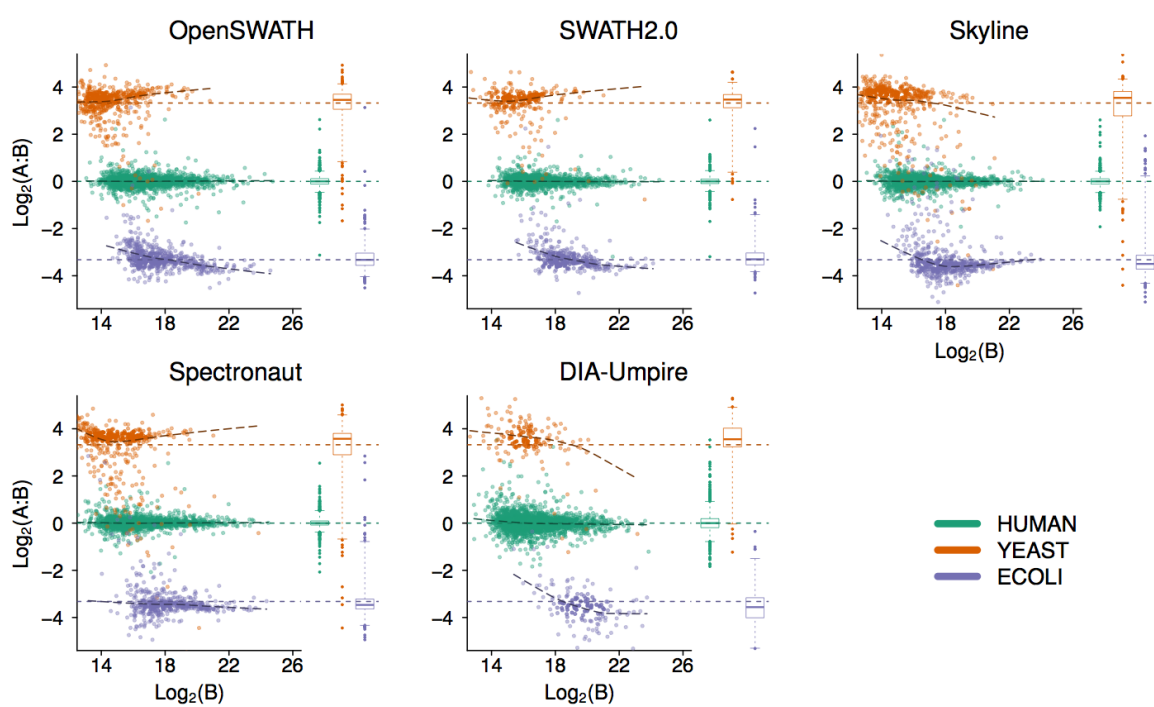

**Supplementary Figure 8.H:** LFQbench protein level benchmarks for HYE 110, TripleTOF 6600, 64var setup.

## Supplementary Figure 9. LFQbench protein level benchmarks for single-hit proteins for all instrument/workflow combinations.

Protein single hits are proteins identified by only one peptide, which are discarded by LFQbench.

Log-transformed ratios ( $\log_2(A/B)$ ) of proteins were plotted for each benchmarked software tool over the log-transformed scaled intensity of sample B. Dashed colored lines represent the expected  $\log_2(A/B)$  values for human, yeast, and E.coli peptides. Black dashed lines represent the local trend along the x-axis of experimental log-transformed ratios of each population (human, yeast, and E.coli). In case of sample HYE124, panel A shows both iterations for all software tools, and panel B shows the  $\log_2(A/B)$  of the averages between technical replicates of A and B for E.coli peptides in the lowest intensity tertile. Boxes represent 25% and 75% percentiles, whiskers cover data points between 1% and 99% percentiles.

Intensities of multiply charged precursors were summed up, and averaged between technical replicates of each sample. Protein quantities were estimated by the average intensity (three technical replicates) of the single peptide identified of the protein (single hit). The protein intensities of each software tool were then scaled to SWATH 2.0 intensity scale by using a linear model fixed in the origin.

The following pages show:

- Supplementary Figure 9.A: HYE 124, TripleTOF 5600, 32fix setup
- Supplementary Figure 9.B: HYE 124, TripleTOF 5600, 64var setup
- Supplementary Figure 9.C: HYE 124, TripleTOF 6600, 32fix setup
- Supplementary Figure 9.D: HYE 124, TripleTOF 6600, 64var setup

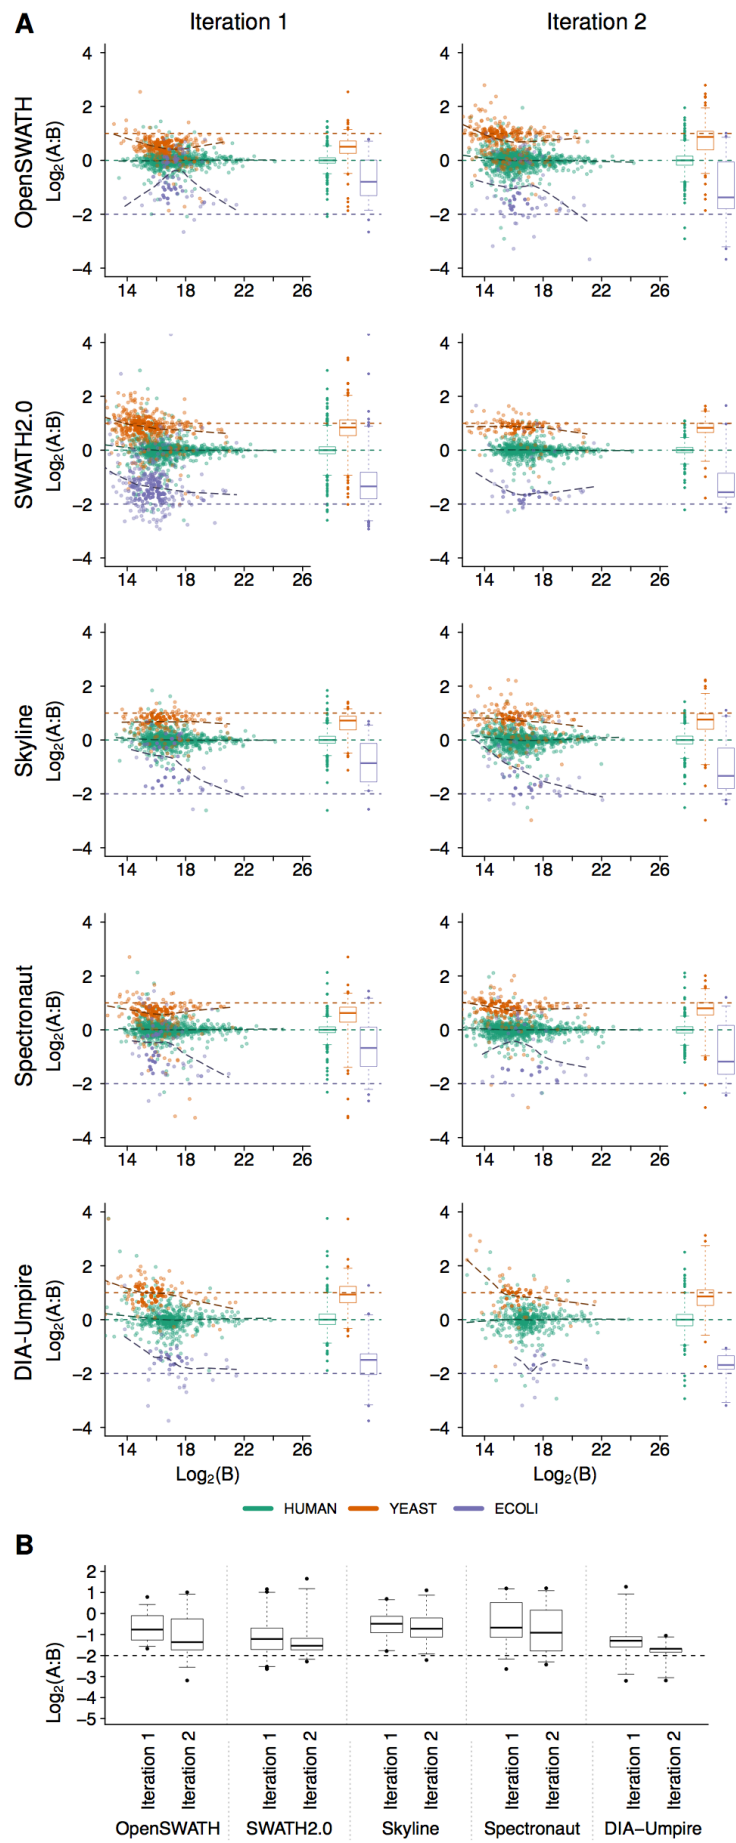

**Supplementary Figure 9.A:** LFQbench single-hits protein level benchmarks for HYE 124, TripleTOF 5600, 32fix setup.

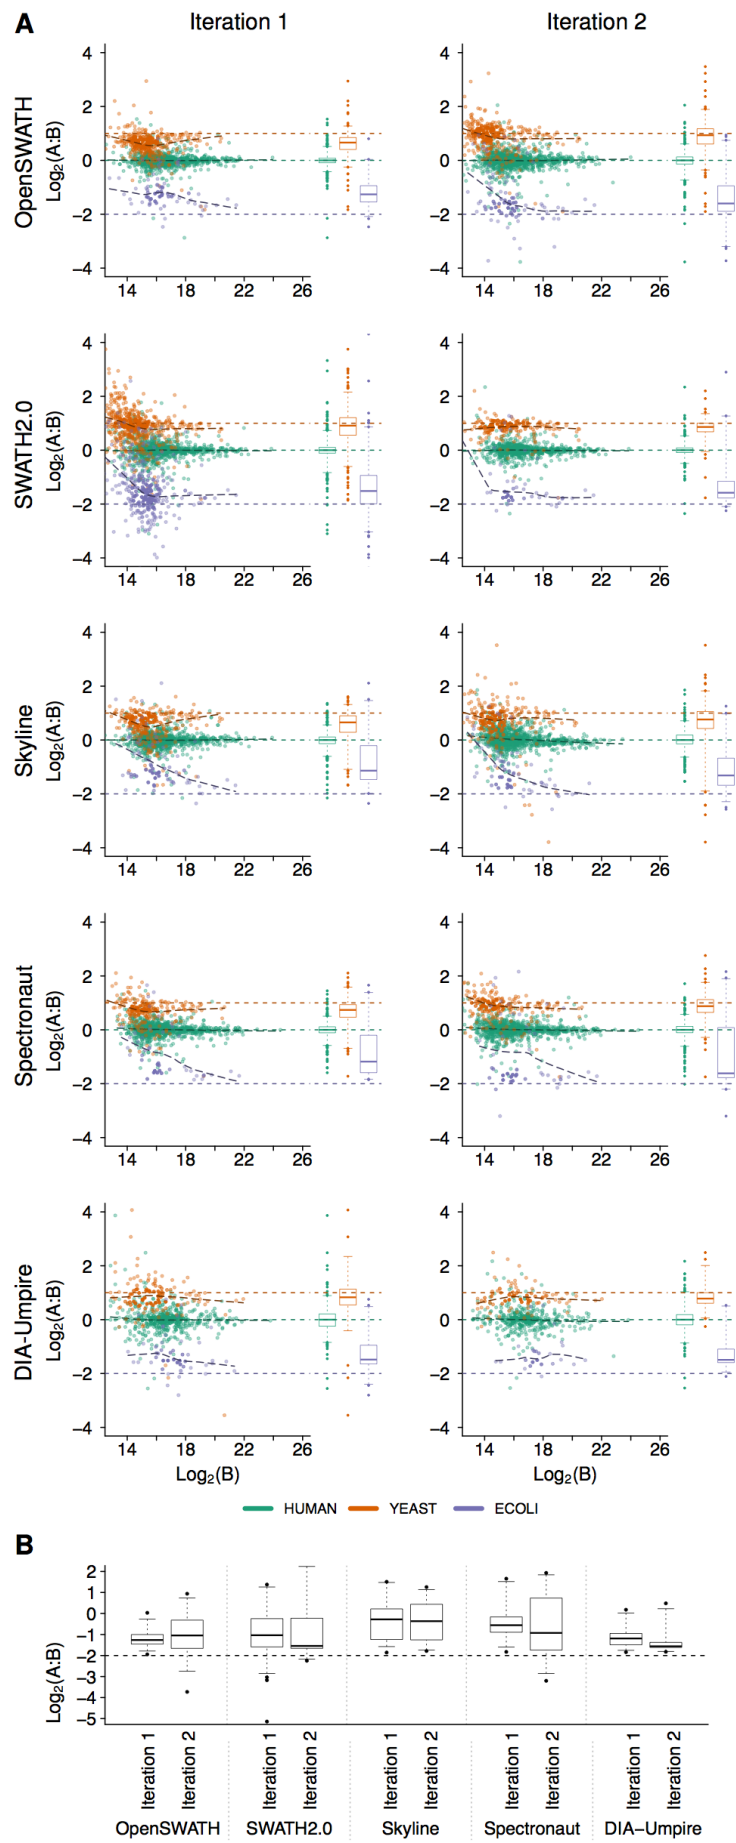

**Supplementary Figure 9.B:** LFQbench single-hits protein level benchmarks for HYE 124, TripleTOF 5600, 64var setup.

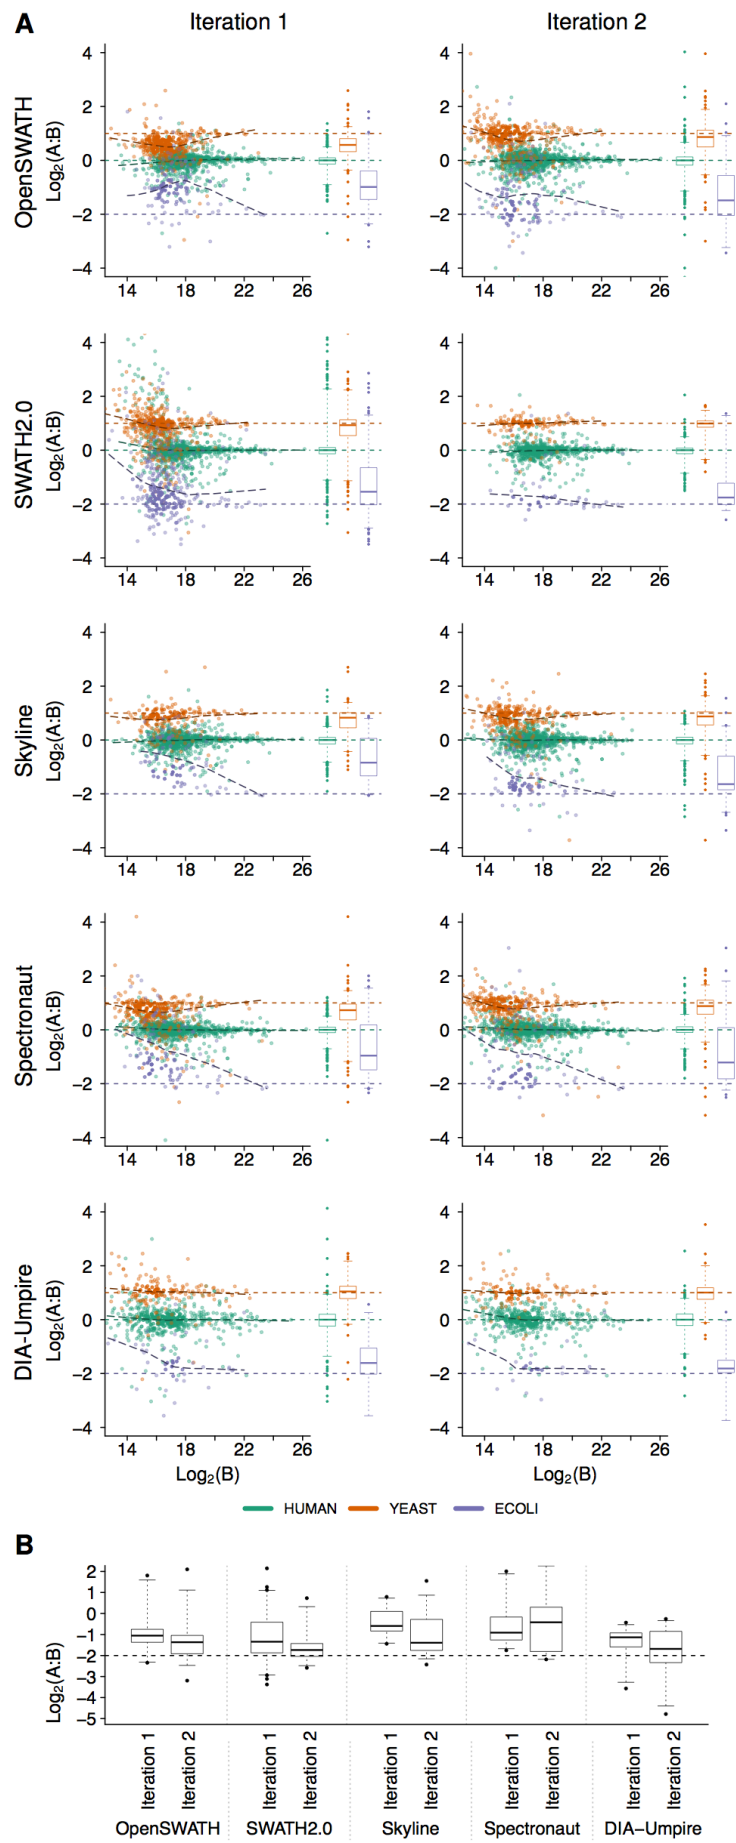

**Supplementary Figure 9.C:** LFQbench single-hits protein level benchmarks for HYE 124, TripleTOF 6600, 32fix setup.

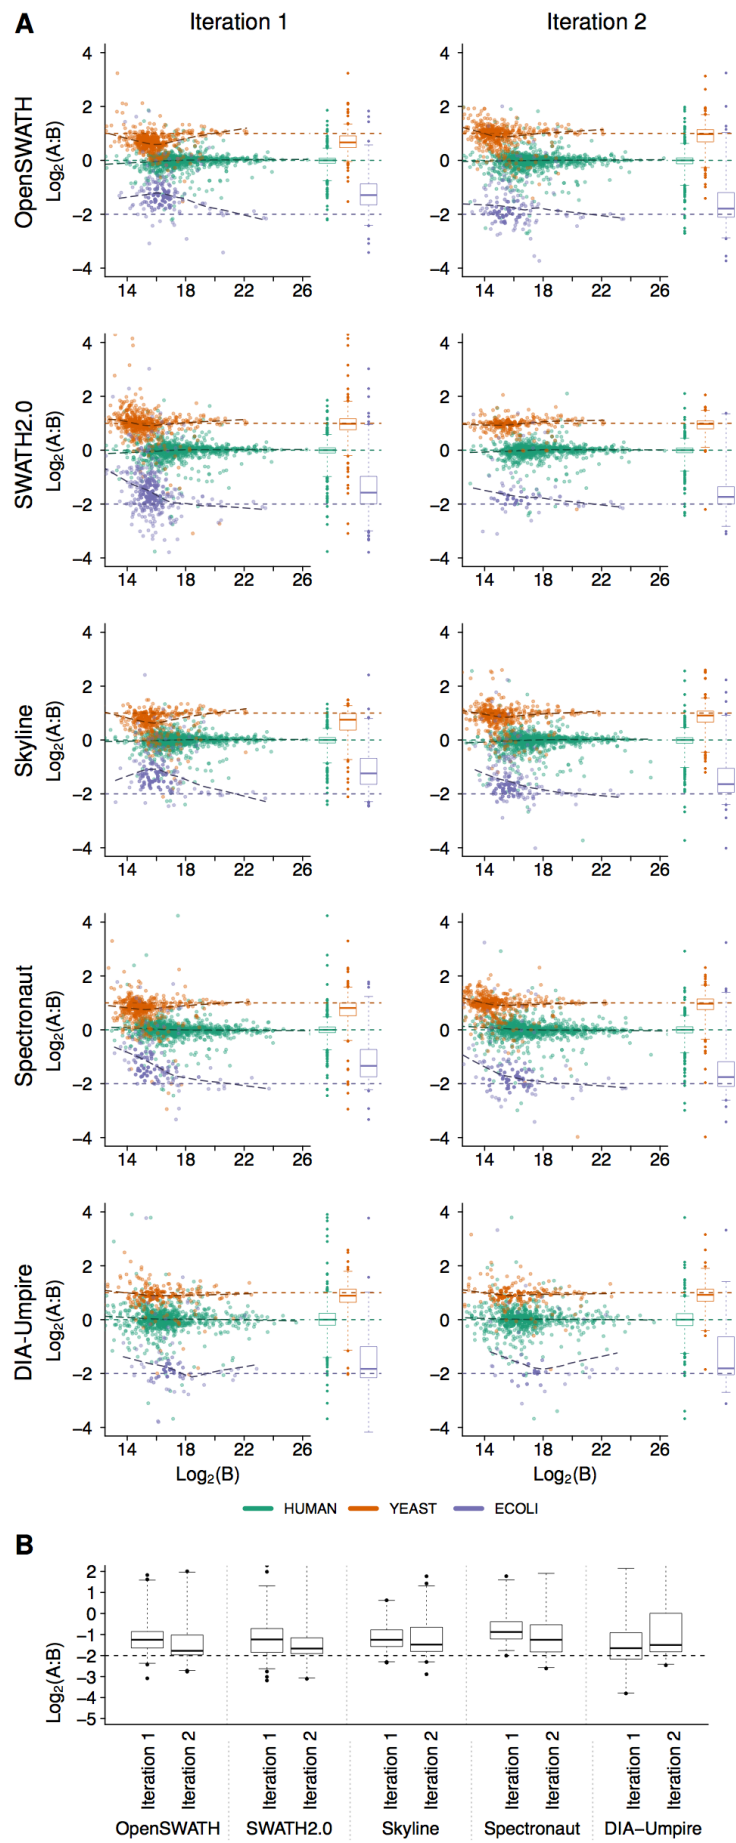

**Supplementary Figure 9.D:** LFQbench single-hits protein level benchmarks for HYE 124, TripleTOF 6600, 64var setup.

**Supplementary Figure 10. Percentage of false negative human proteins (human proteins detected in only one of the samples) without replication rate filtering.**

According to sample composition, human proteins should always be detectable in both samples (A and B). Human proteins that are false-negative in one of the samples (and thus falsely reported as “exclusively detected” in the other samples) are highly problematic from a biological perspective. The data indicate that requiring a protein to be quantified in at least two biological replicates (bar plots group by number of technical replicates – runs – the peptide or protein is detected in the other sample) reduces the false negative rate by up to 70%, depending on instrument, software and SWATH window setup.



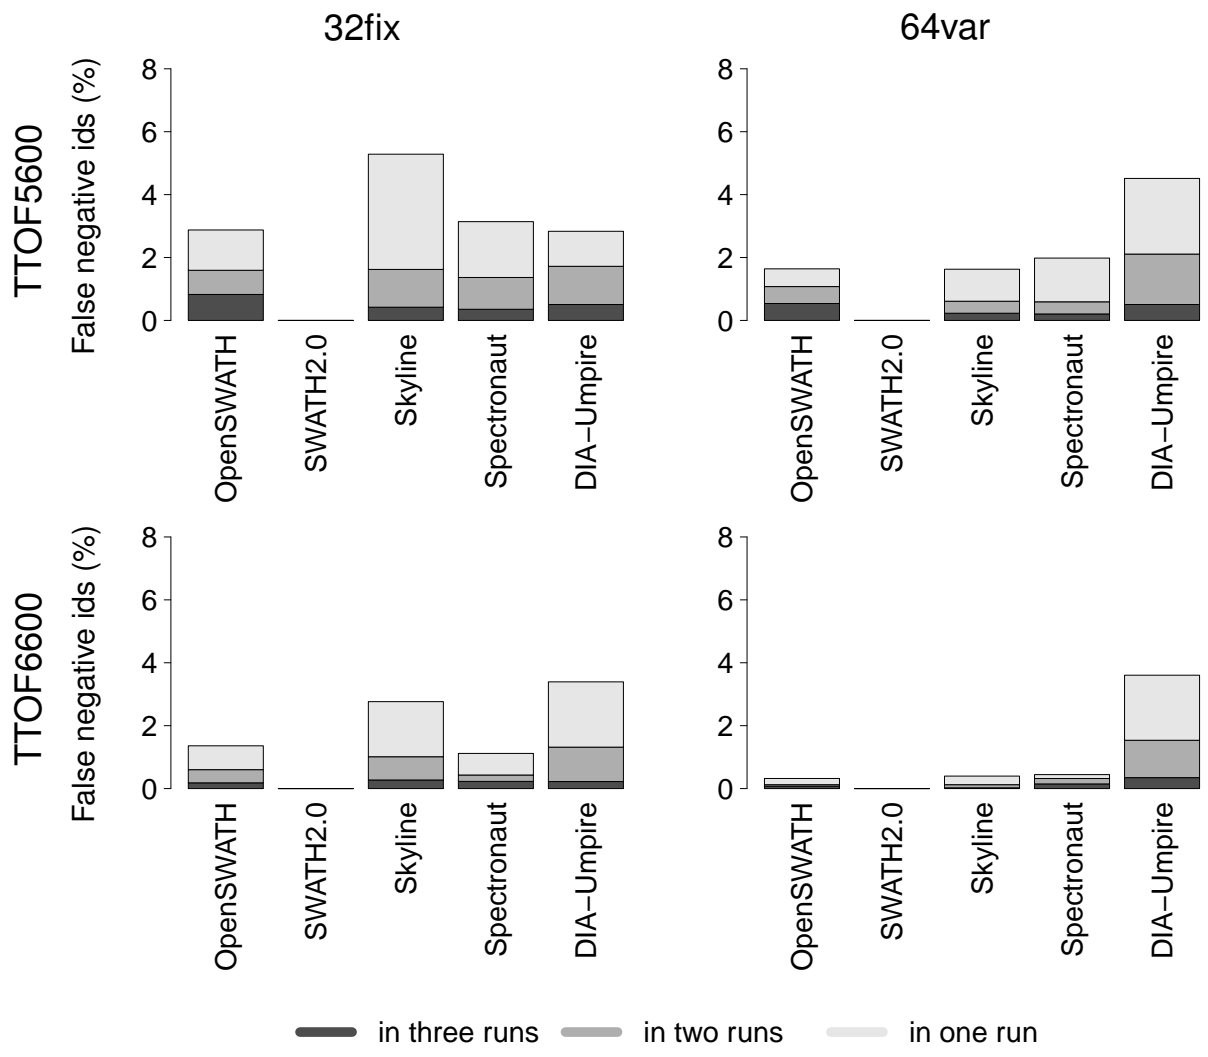

**Supplementary Figure 10:** Percentage of false negative human proteins (human proteins detected in only one of the samples) without replication rate filtering.

## Supplementary Figure 11. Box-and-whisker plots of $\log_2$ ratio distributions in different intensity tertiles for human proteins.

The present figure displays the  $\log_2(A/B)$  of the averages between technical replicates of A and B for human proteins in the lowest intensity (0%-33.3%, top panel), medium (33.3%-66.7%) and highest (66.7%-100%) tertiles. Boxes represent 25% and 75% percentiles, whiskers cover data points between 1% and 99% percentiles.

The following pages show  $\log_2$  ratio distributions for:

- Supplementary Figure 11.A: HYE 124, TripleTOF 5600, 32fix setup
- Supplementary Figure 11.B: HYE 124, TripleTOF 5600, 64var setup
- Supplementary Figure 11.C: HYE 124, TripleTOF 6600, 32fix setup
- Supplementary Figure 11.D: HYE 124, TripleTOF 6600, 64var setup

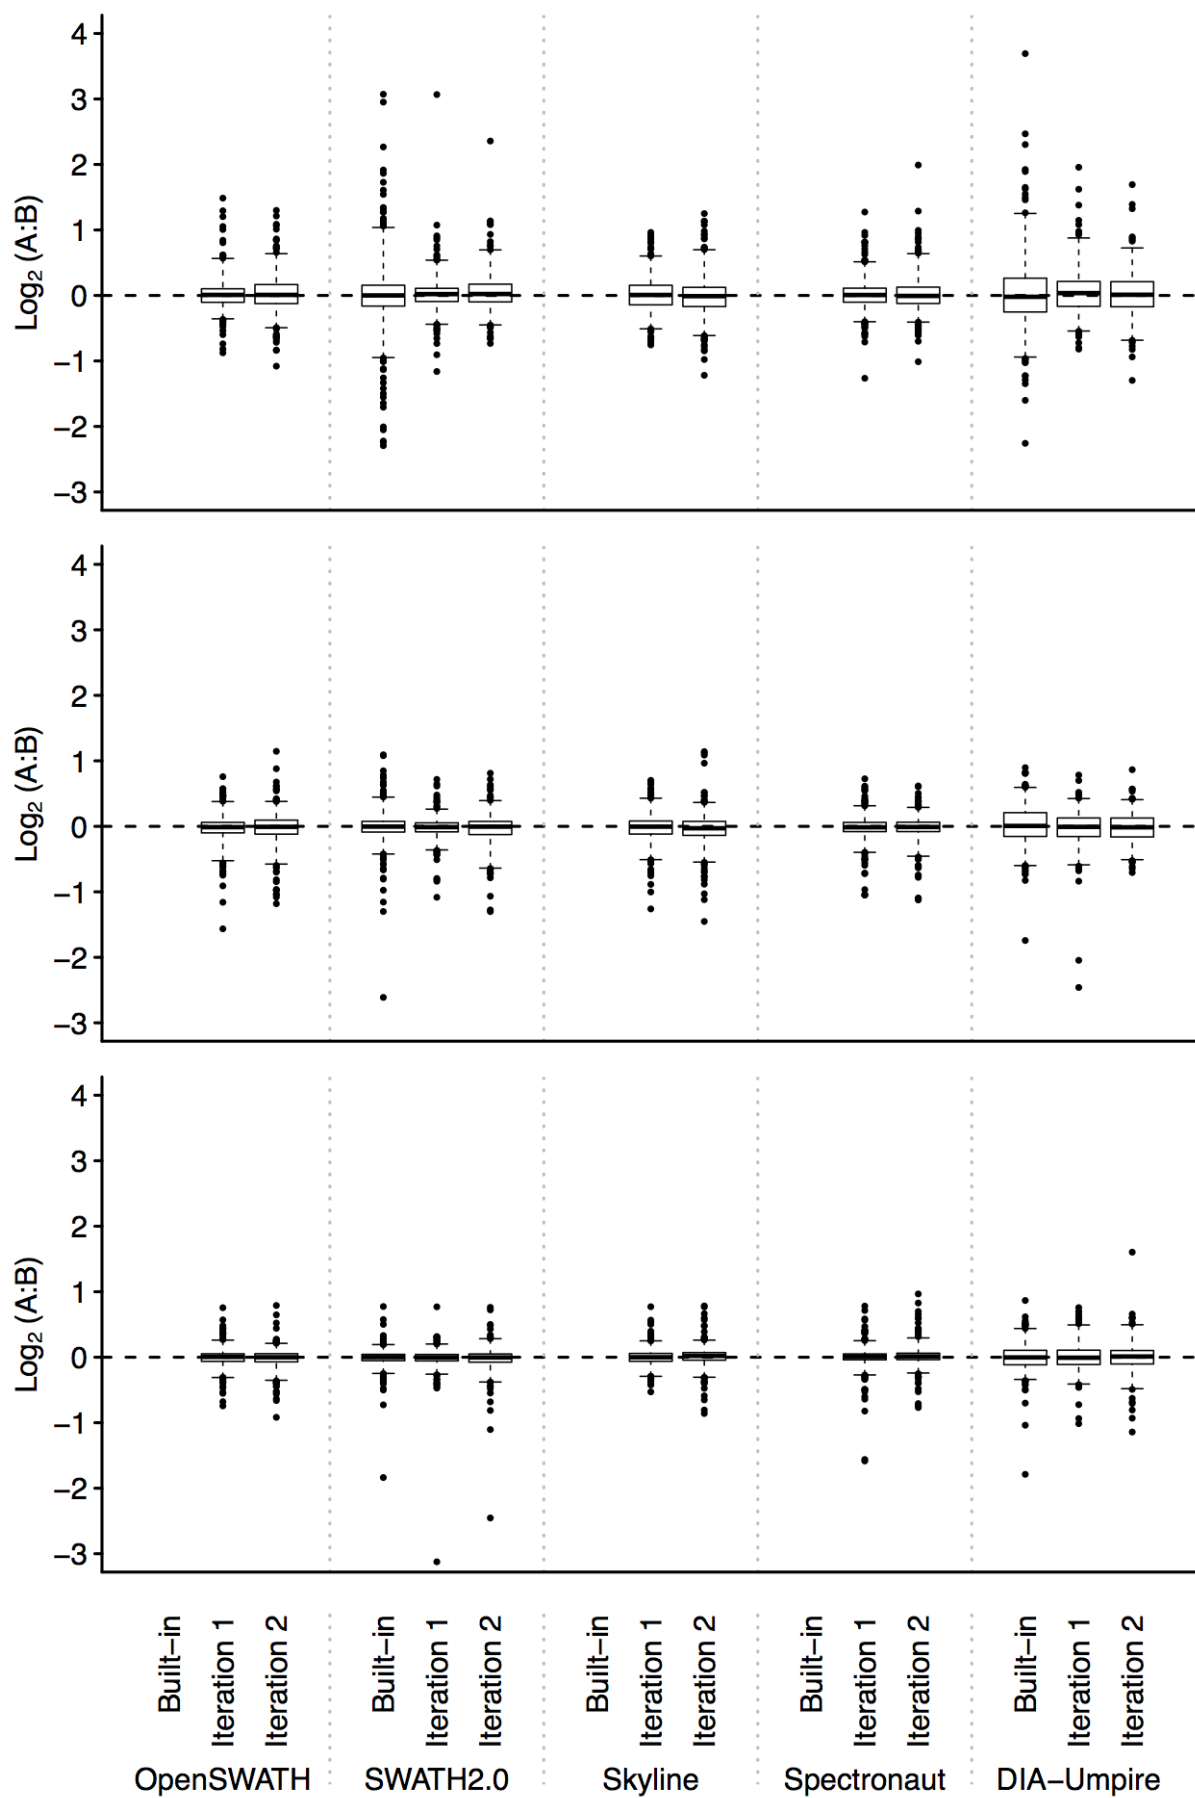

**Supplementary Figure 11.A:**  $\log_2$  ratio distributions in different intensity tertiles for human proteins for HYE 124, TripleTOF 5600, 32fix setup.

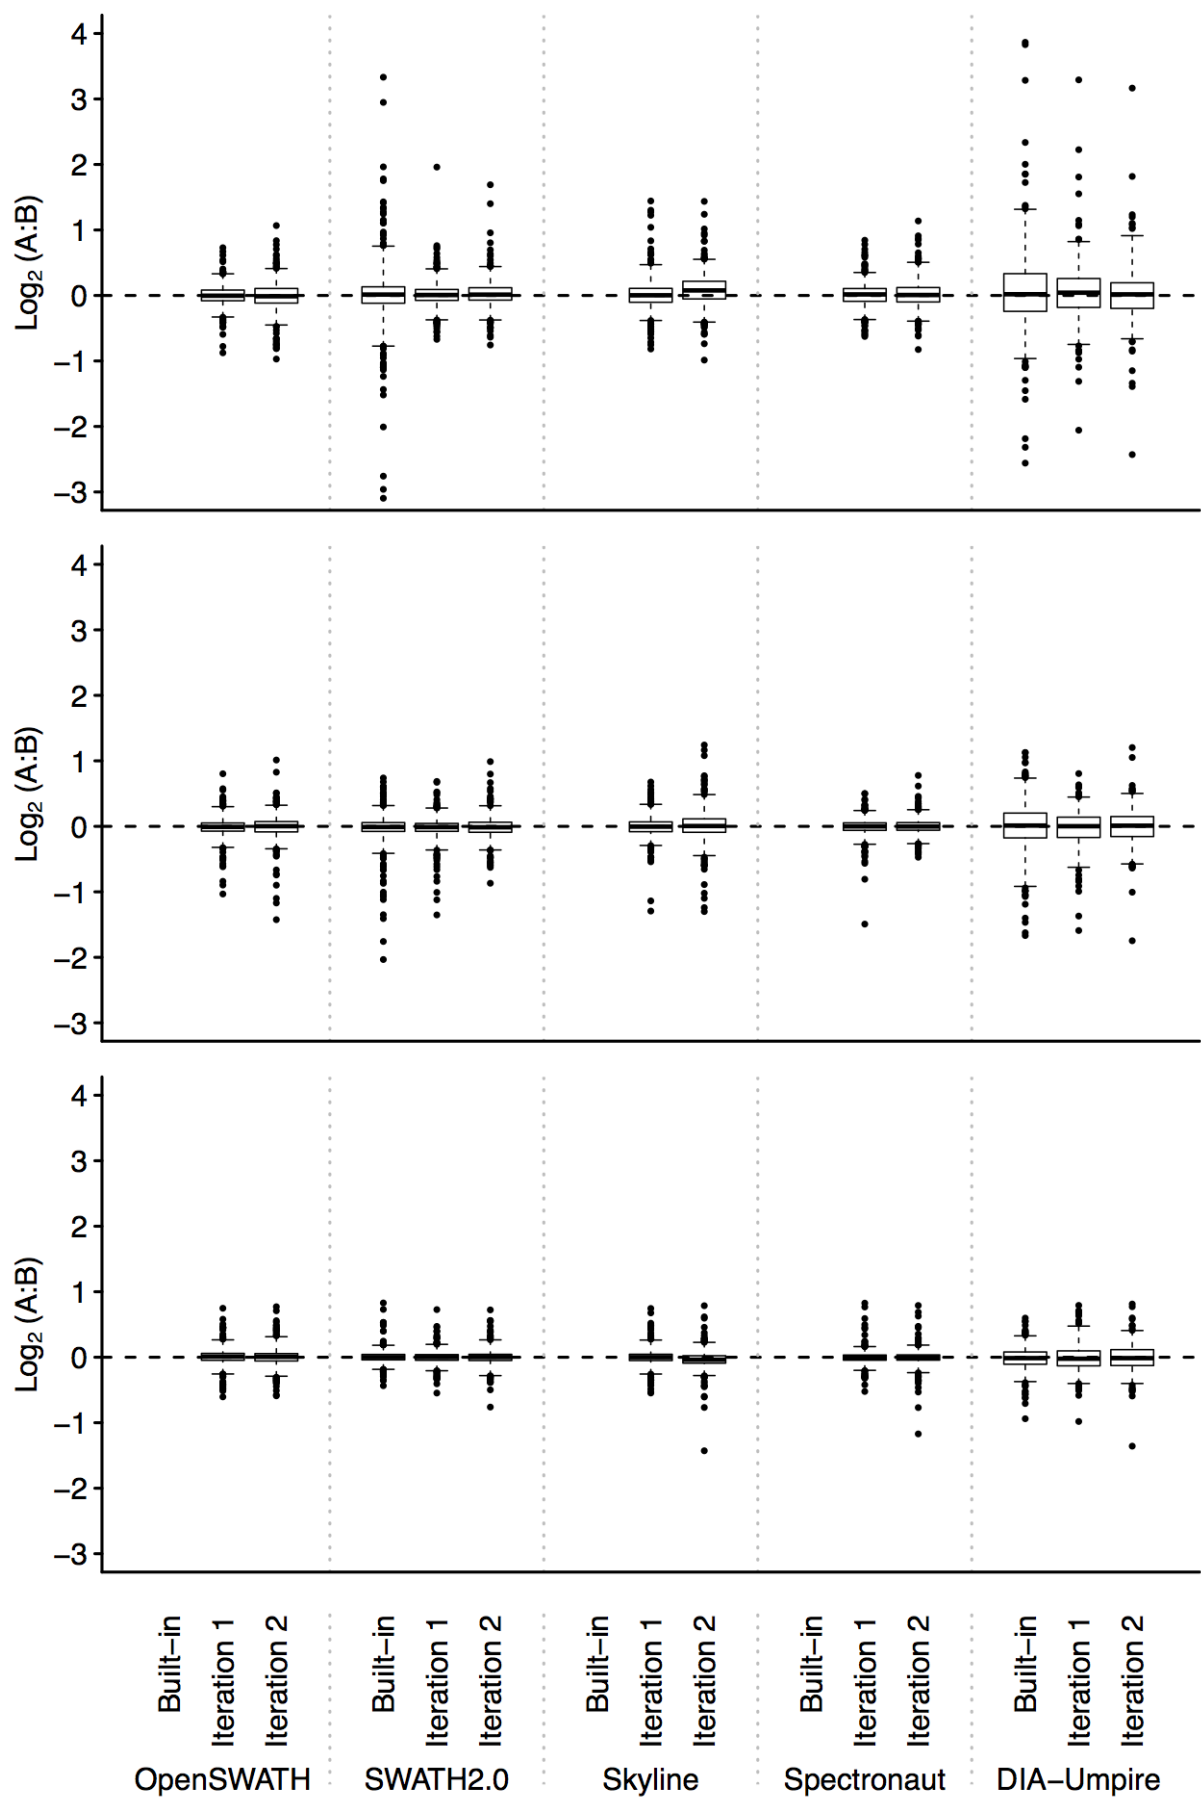

**Supplementary Figure 11.B:**  $\log_2$  ratio distributions in different intensity tertiles for human proteins for HYE 124, TripleTOF 5600, 64var setup.

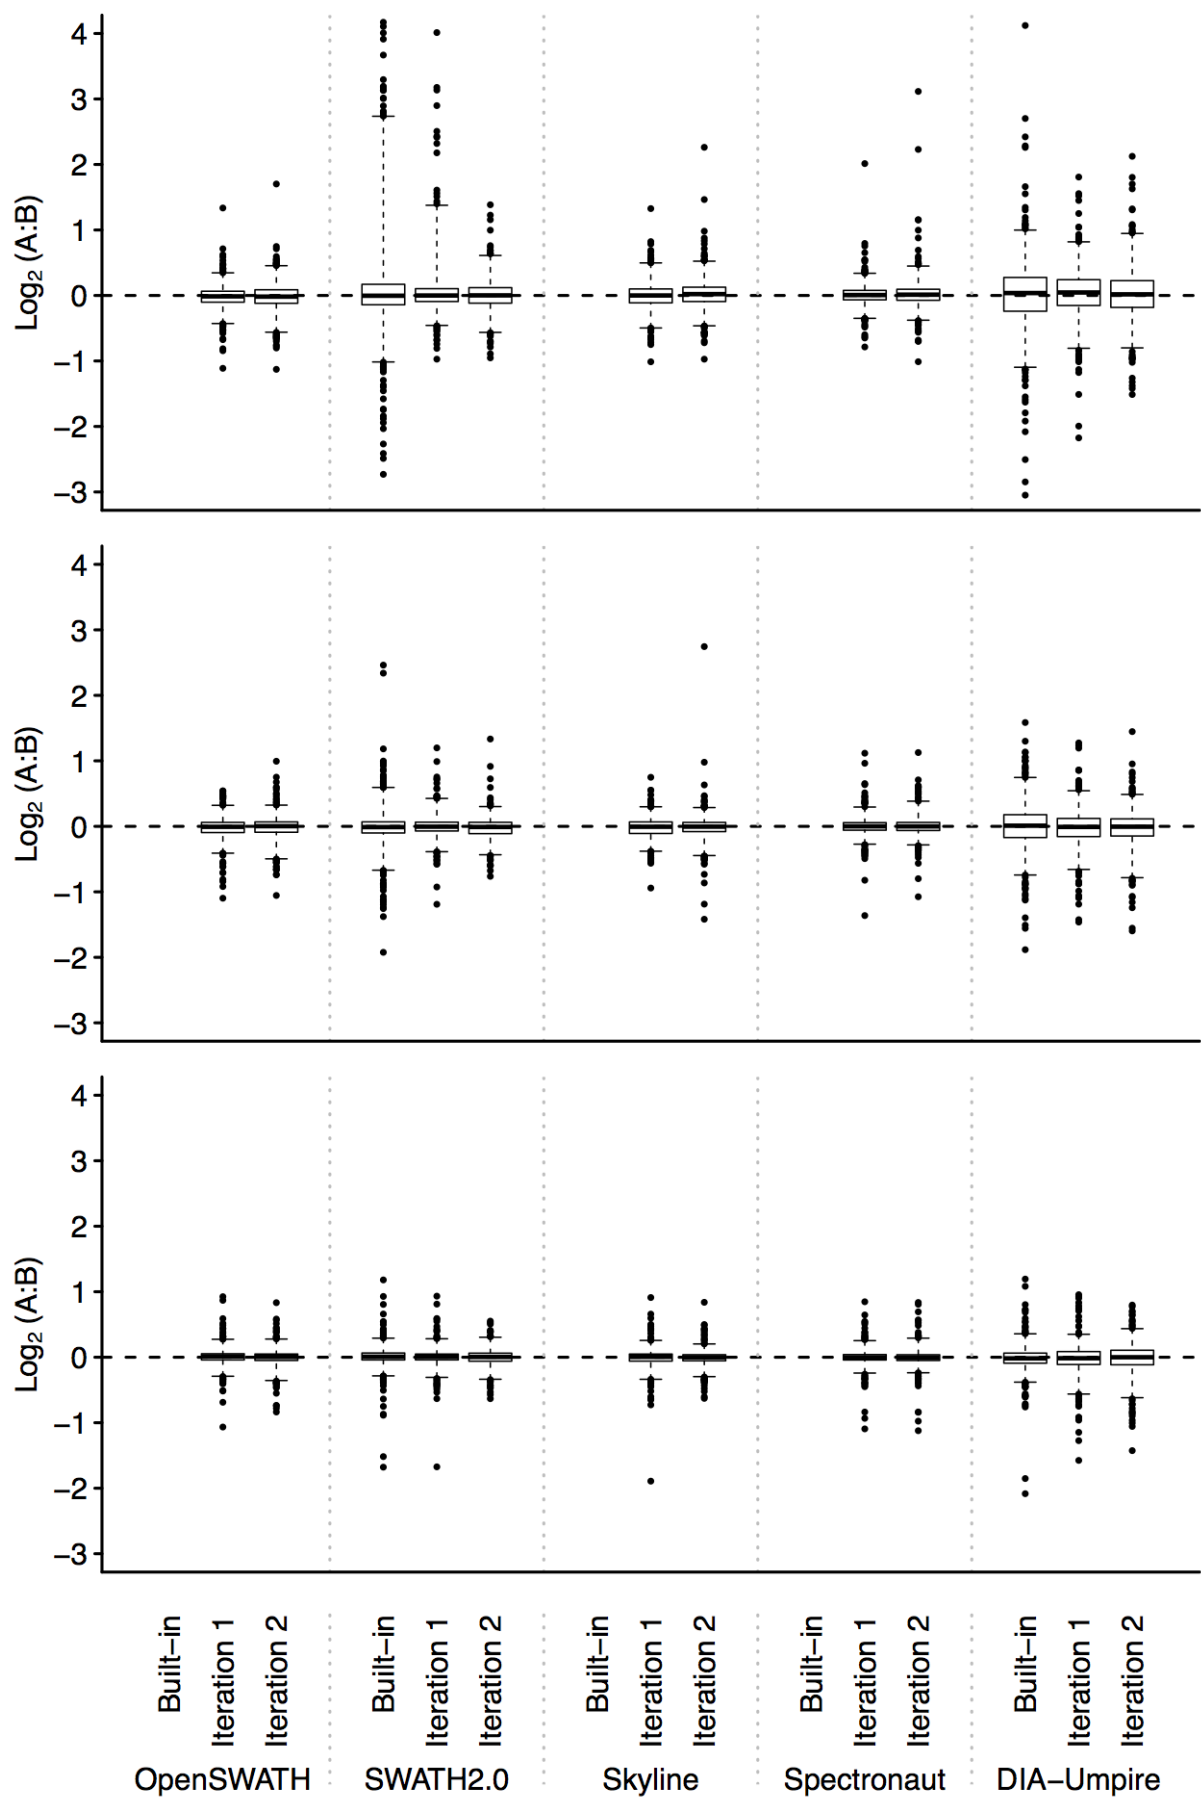

Supplementary Figure 11.C:  $\log_2$  ratio distributions in different intensity tertiles for human proteins for HYE 124, TripleTOF 6600, 32fix setup.

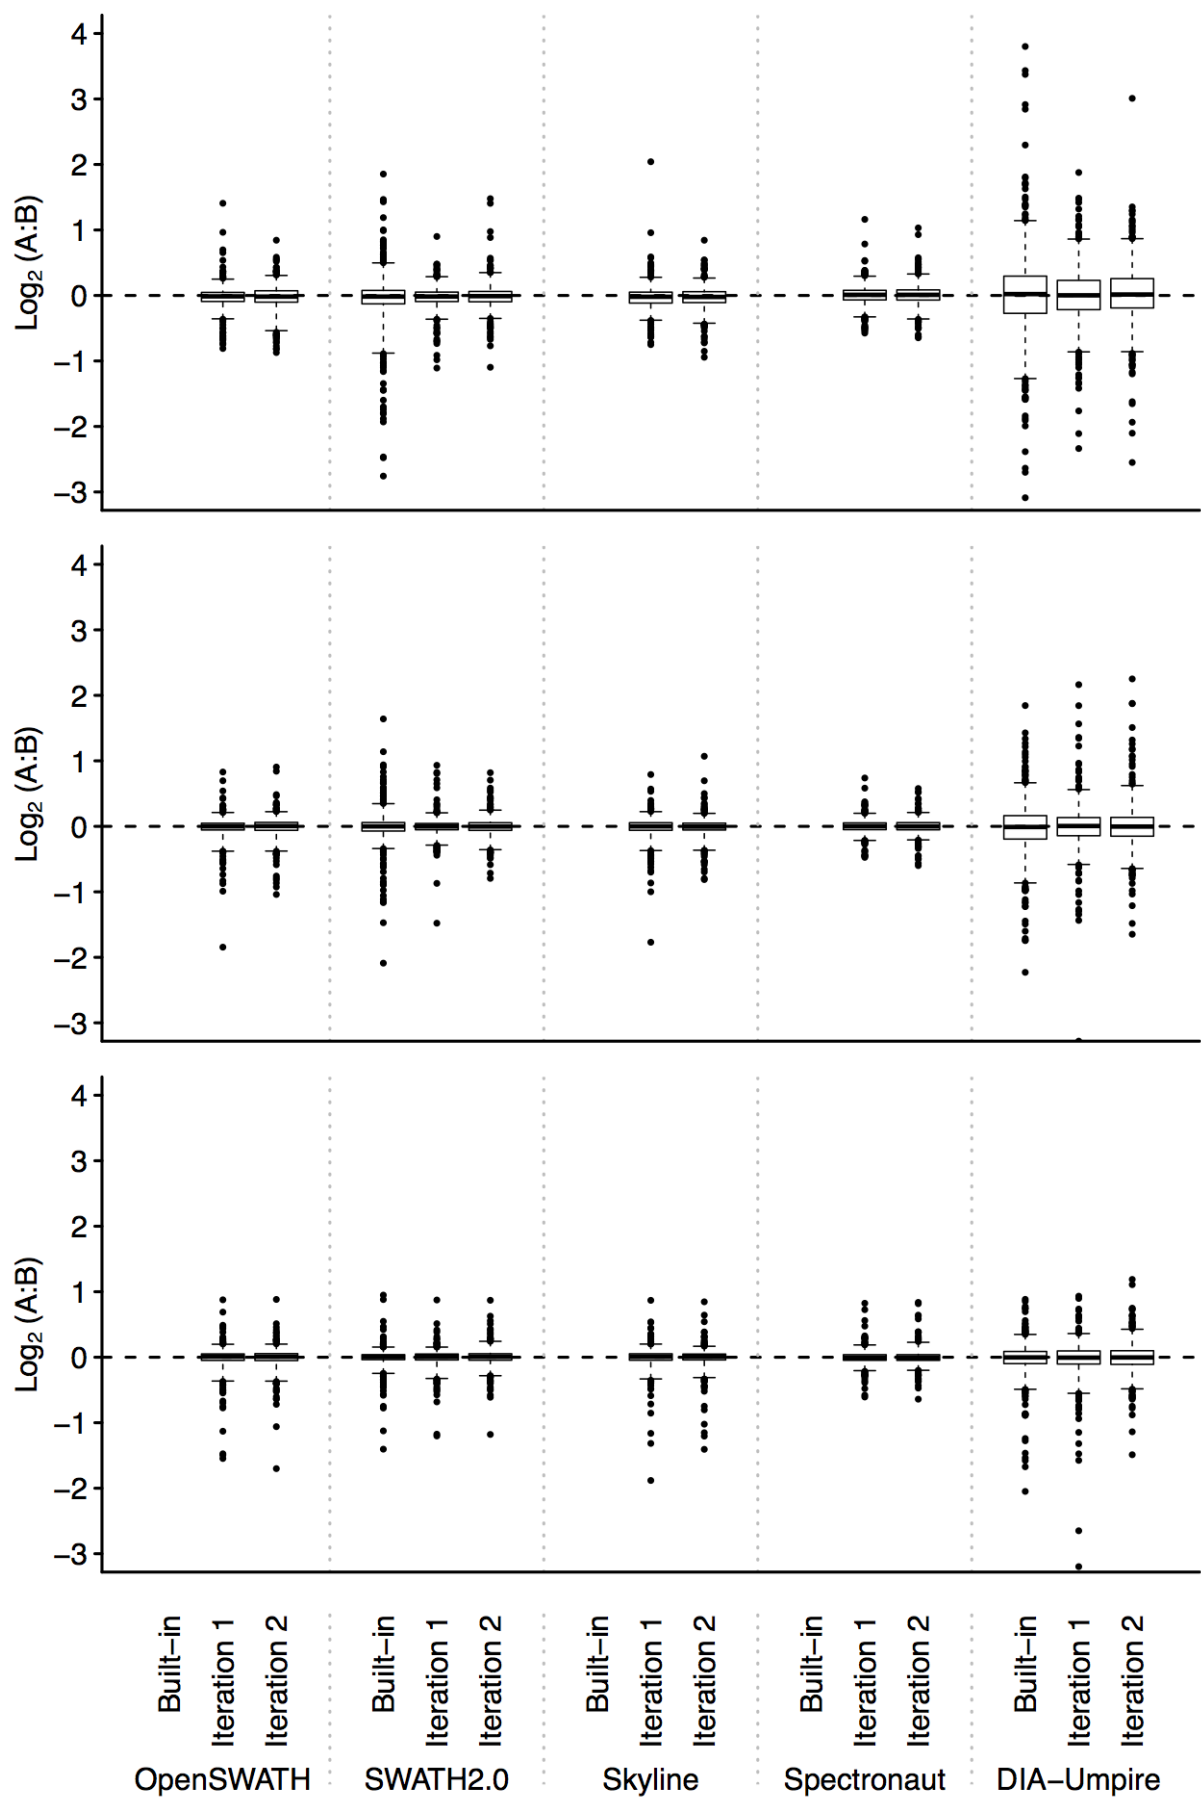

**Supplementary Figure 11.D:**  $\log_2$  ratio distributions in different intensity tertiles for human proteins for HYE 124, TripleTOF 6600, 64var setup.

## Supplementary Figure 12. Box-and-whisker plots of $\log_2$ ratio distributions in different intensity tertiles for yeast proteins.

The present figure displays the  $\log_2(A/B)$  of the averages between technical replicates of A and B for yeast proteins in the lowest intensity (0%-33.3%, top panel), medium (33.3%-66.7%) and highest (66.7%-100%) tertiles. Boxes represent 25% and 75% percentiles, whiskers cover data points between 1% and 99% percentiles.

The following pages show  $\log_2$  ratio distributions for:

- Supplementary Figure 12.A: HYE 124, TripleTOF 5600, 32fix setup
- Supplementary Figure 12.B: HYE 124, TripleTOF 5600, 64var setup
- Supplementary Figure 12.C: HYE 124, TripleTOF 6600, 32fix setup
- Supplementary Figure 12.D: HYE 124, TripleTOF 6600, 64var setup

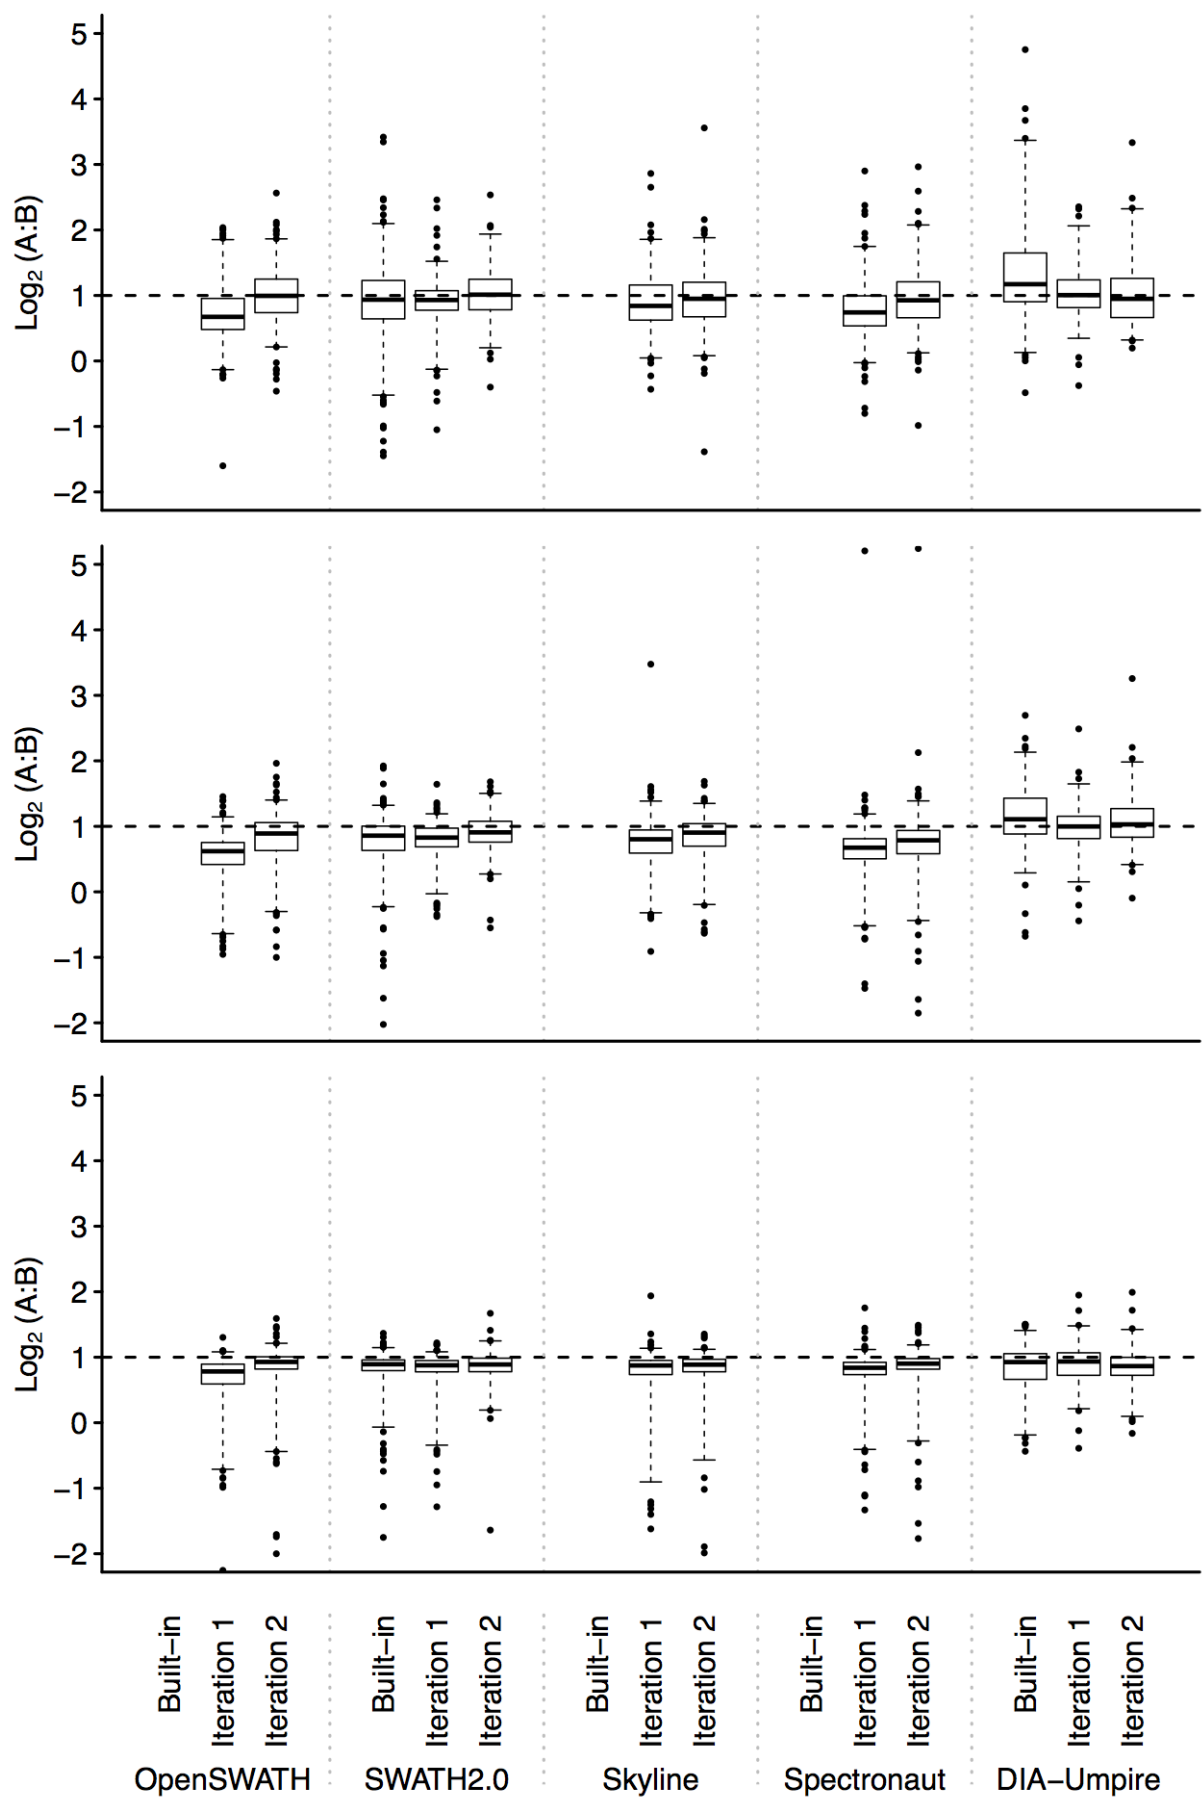

**Supplementary Figure 12.A:**  $\log_2$  ratio distributions in different intensity tertiles for yeast proteins for HYE 124, TripleTOF 5600, 32fix setup.



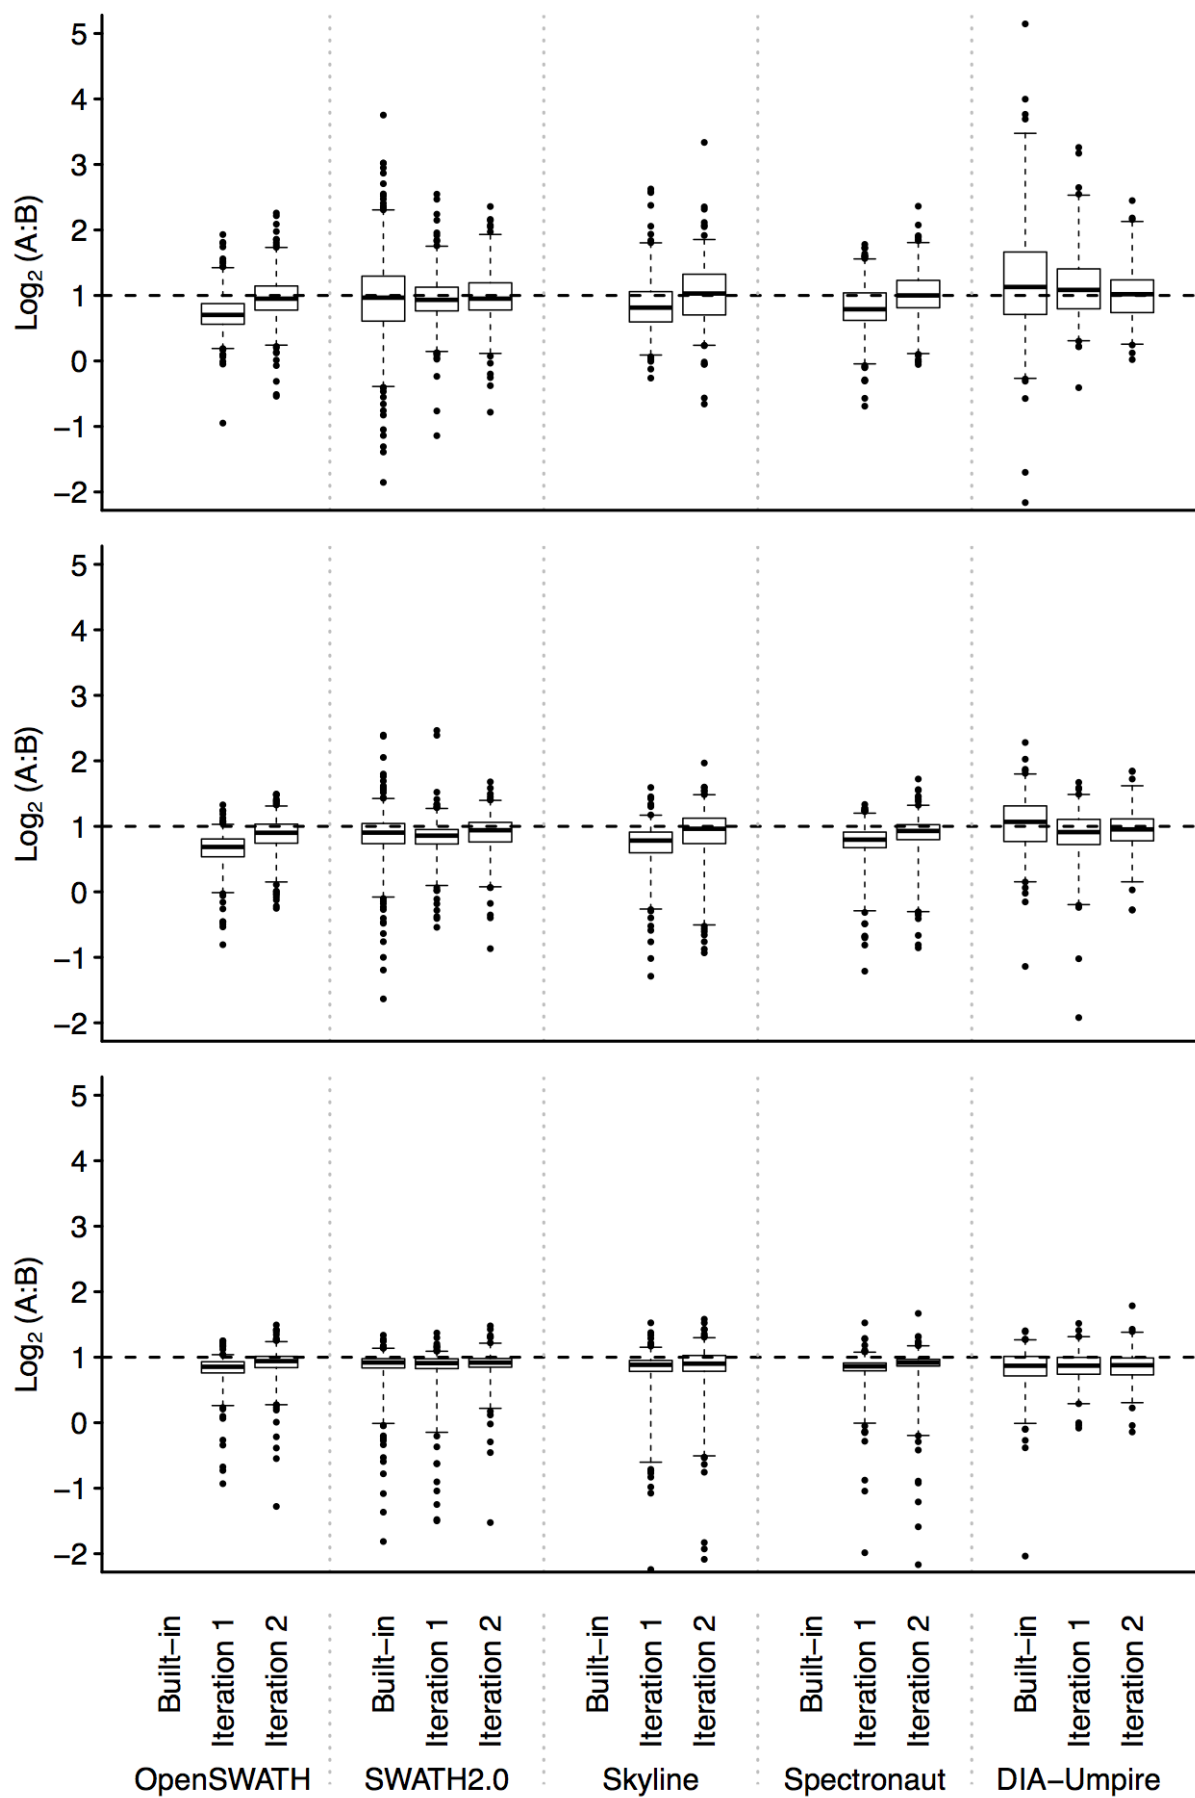

**Supplementary Figure 12.B:**  $\log_2$  ratio distributions in different intensity tertiles for yeast proteins for HYE 124, TripleTOF 5600, 64var setup.

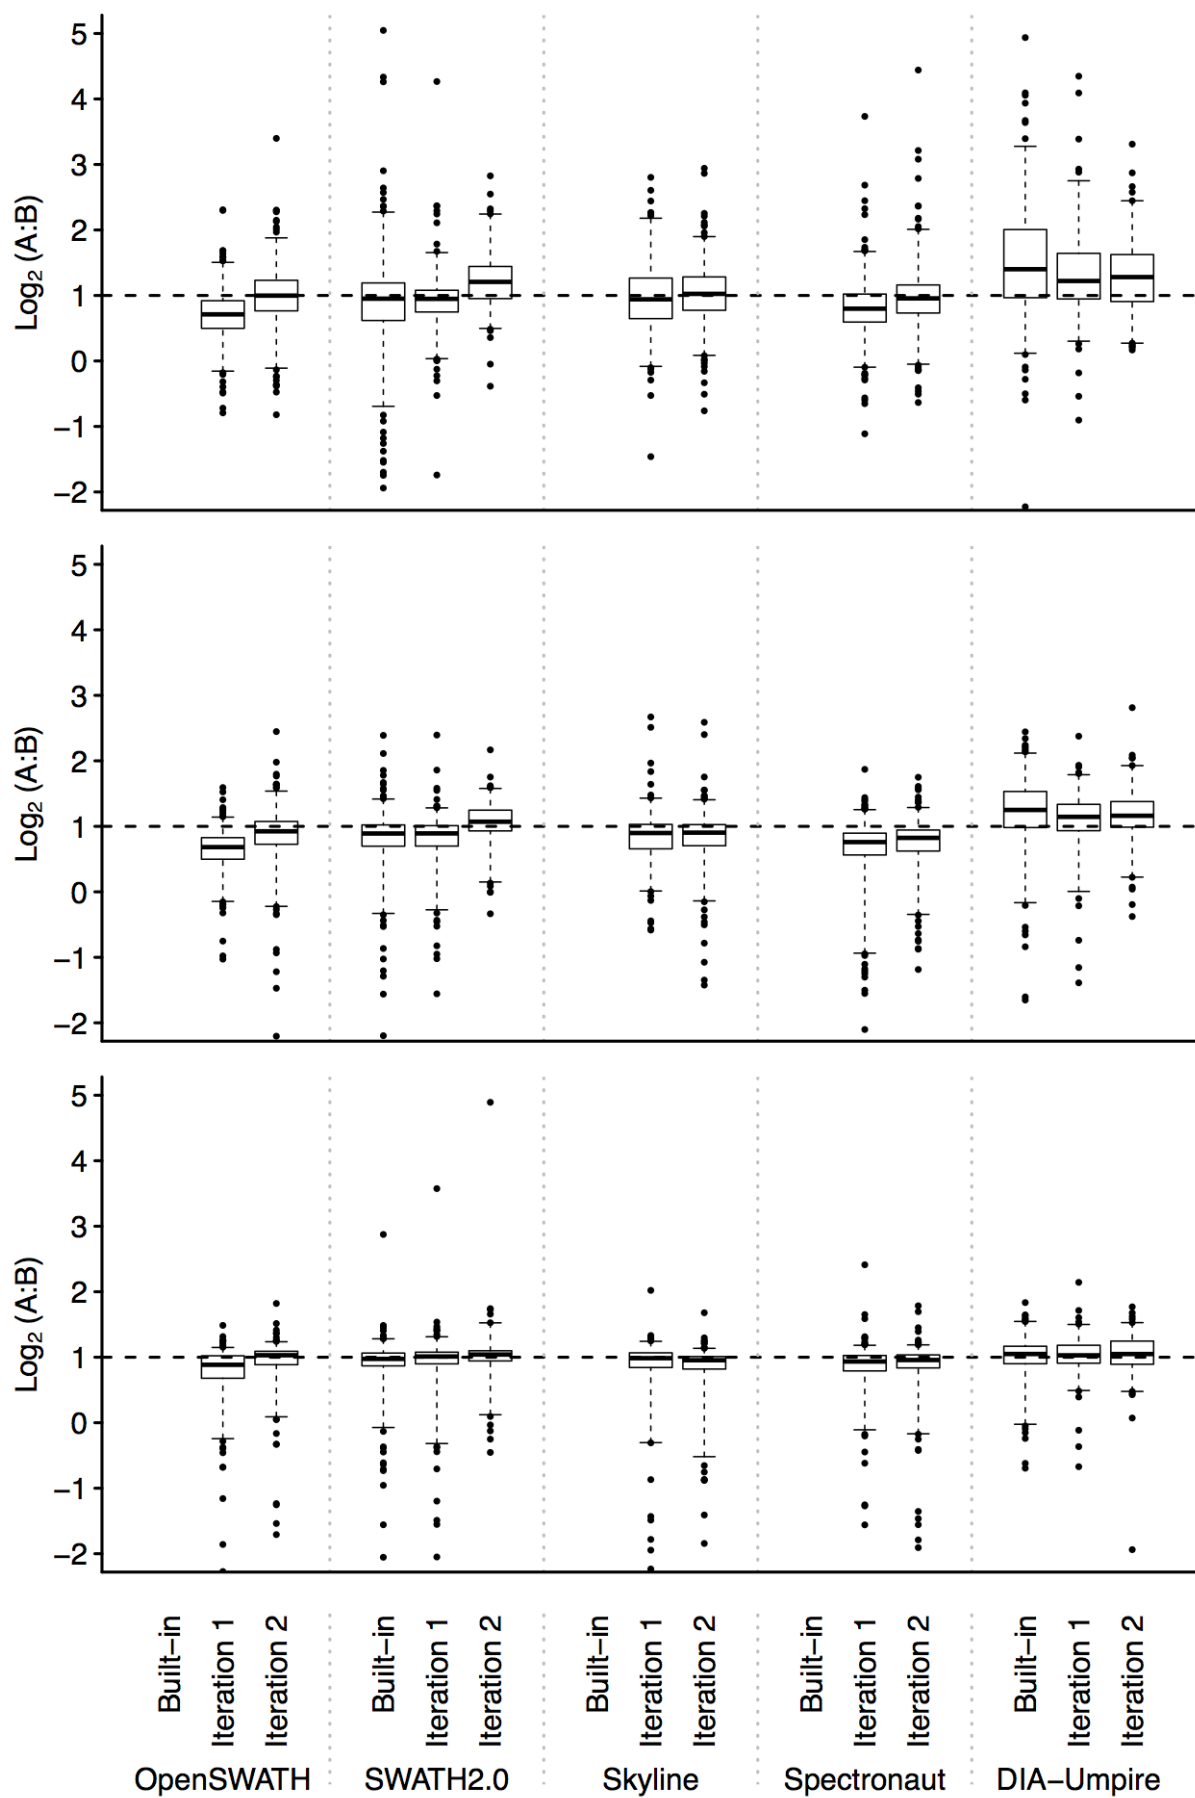

**Supplementary Figure 12.C:**  $\log_2$  ratio distributions in different intensity tertiles for yeast proteins for HYE 124, TripleTOF 6600, 32fix setup.

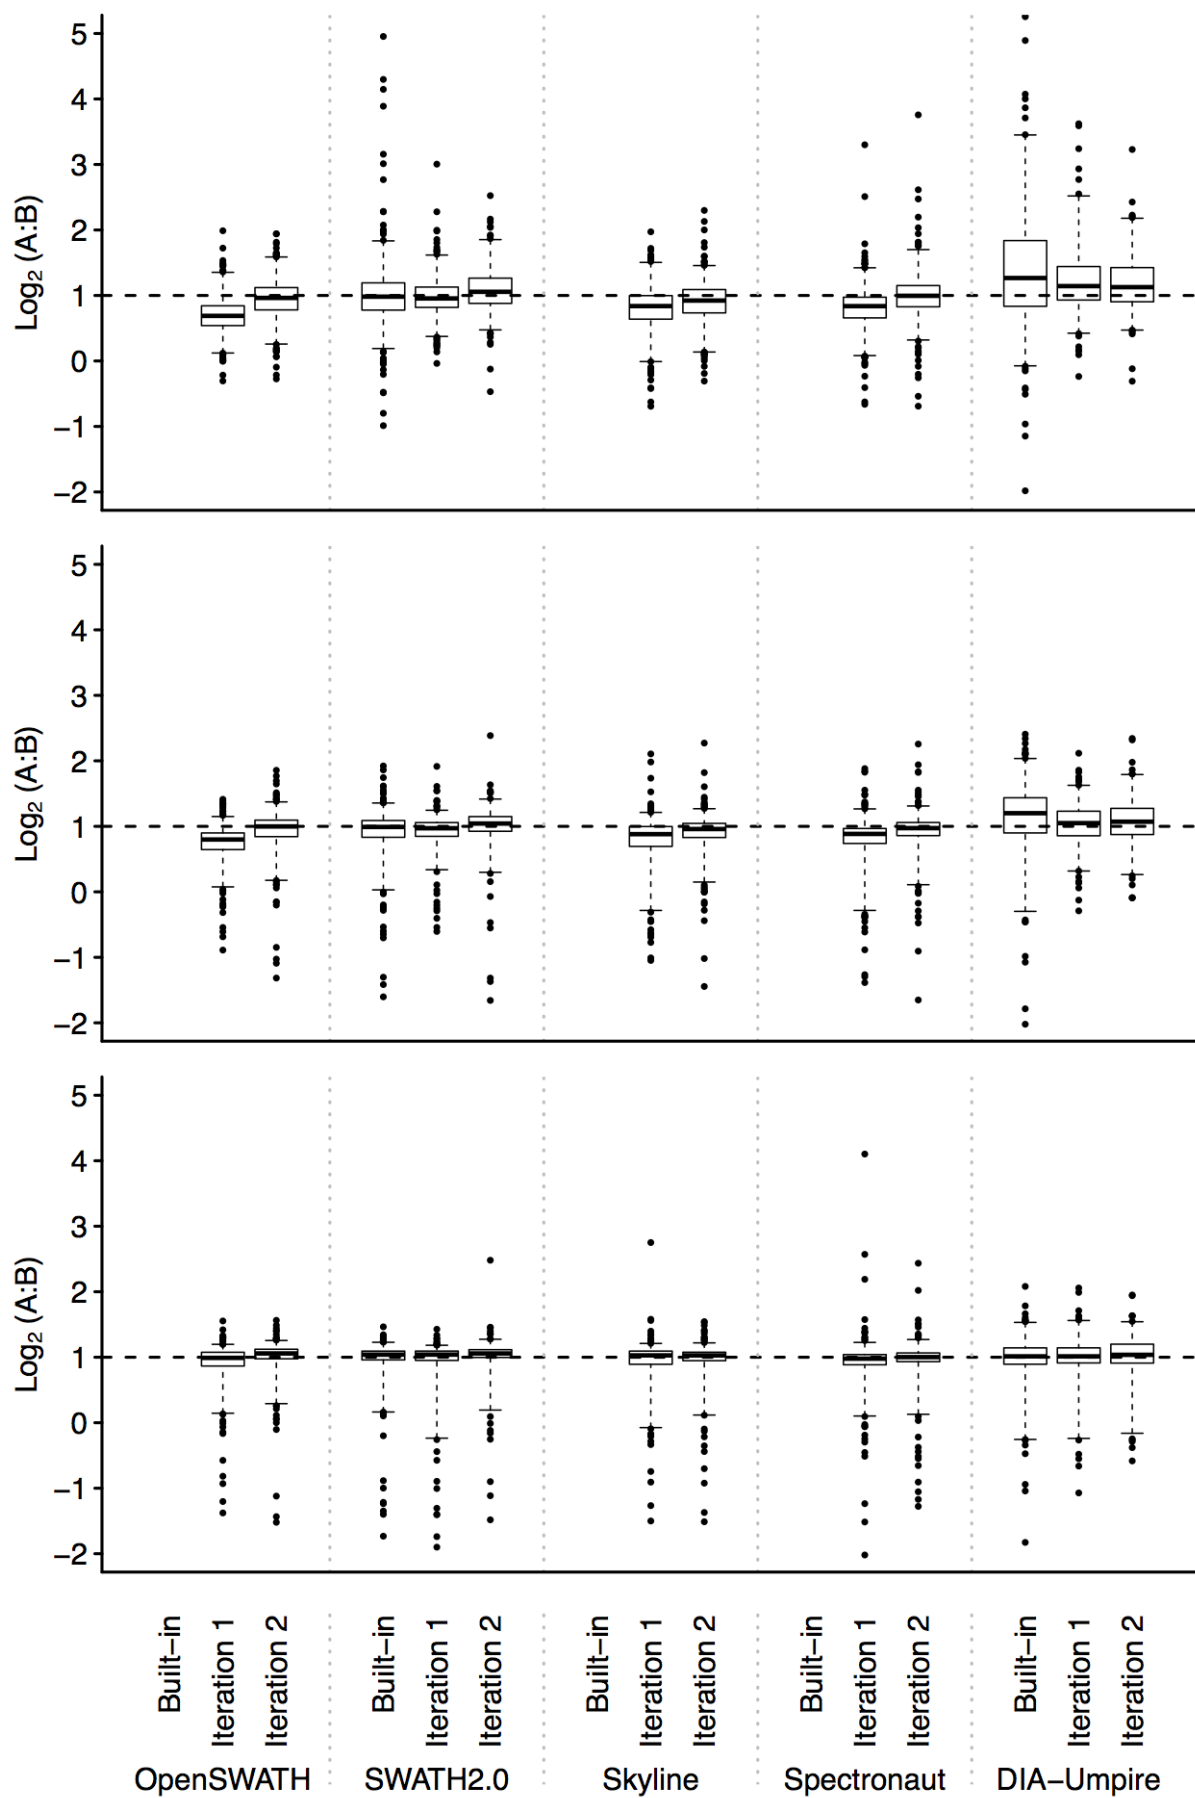

Supplementary Figure 12.D:  $\log_2$  ratio distributions in different intensity tertiles for yeast proteins for HYE 124, TripleTOF 6600, 64var setup.

### **Supplementary Figure 13. Box-and-whisker plots of $\log_2$ ratio distributions in different intensity tertiles for E.coli proteins.**

The present figure displays the  $\log_2(A/B)$  of the averages between technical replicates of A and B for E.coli proteins in the lowest intensity (0%-33.3%, top panel), medium (33.3%-66.7%) and highest (66.7%-100%) tertiles. Boxes represent 25% and 75% percentiles, whiskers cover data points between 1% and 99% percentiles.

The following pages show  $\log_2$  ratio distributions for:

- Supplementary Figure 13.A: HYE 124, TripleTOF 5600, 32fix setup
- Supplementary Figure 13.B: HYE 124, TripleTOF 5600, 64var setup
- Supplementary Figure 13.C: HYE 124, TripleTOF 6600, 32fix setup
- Supplementary Figure 13.D: HYE 124, TripleTOF 6600, 64var setup

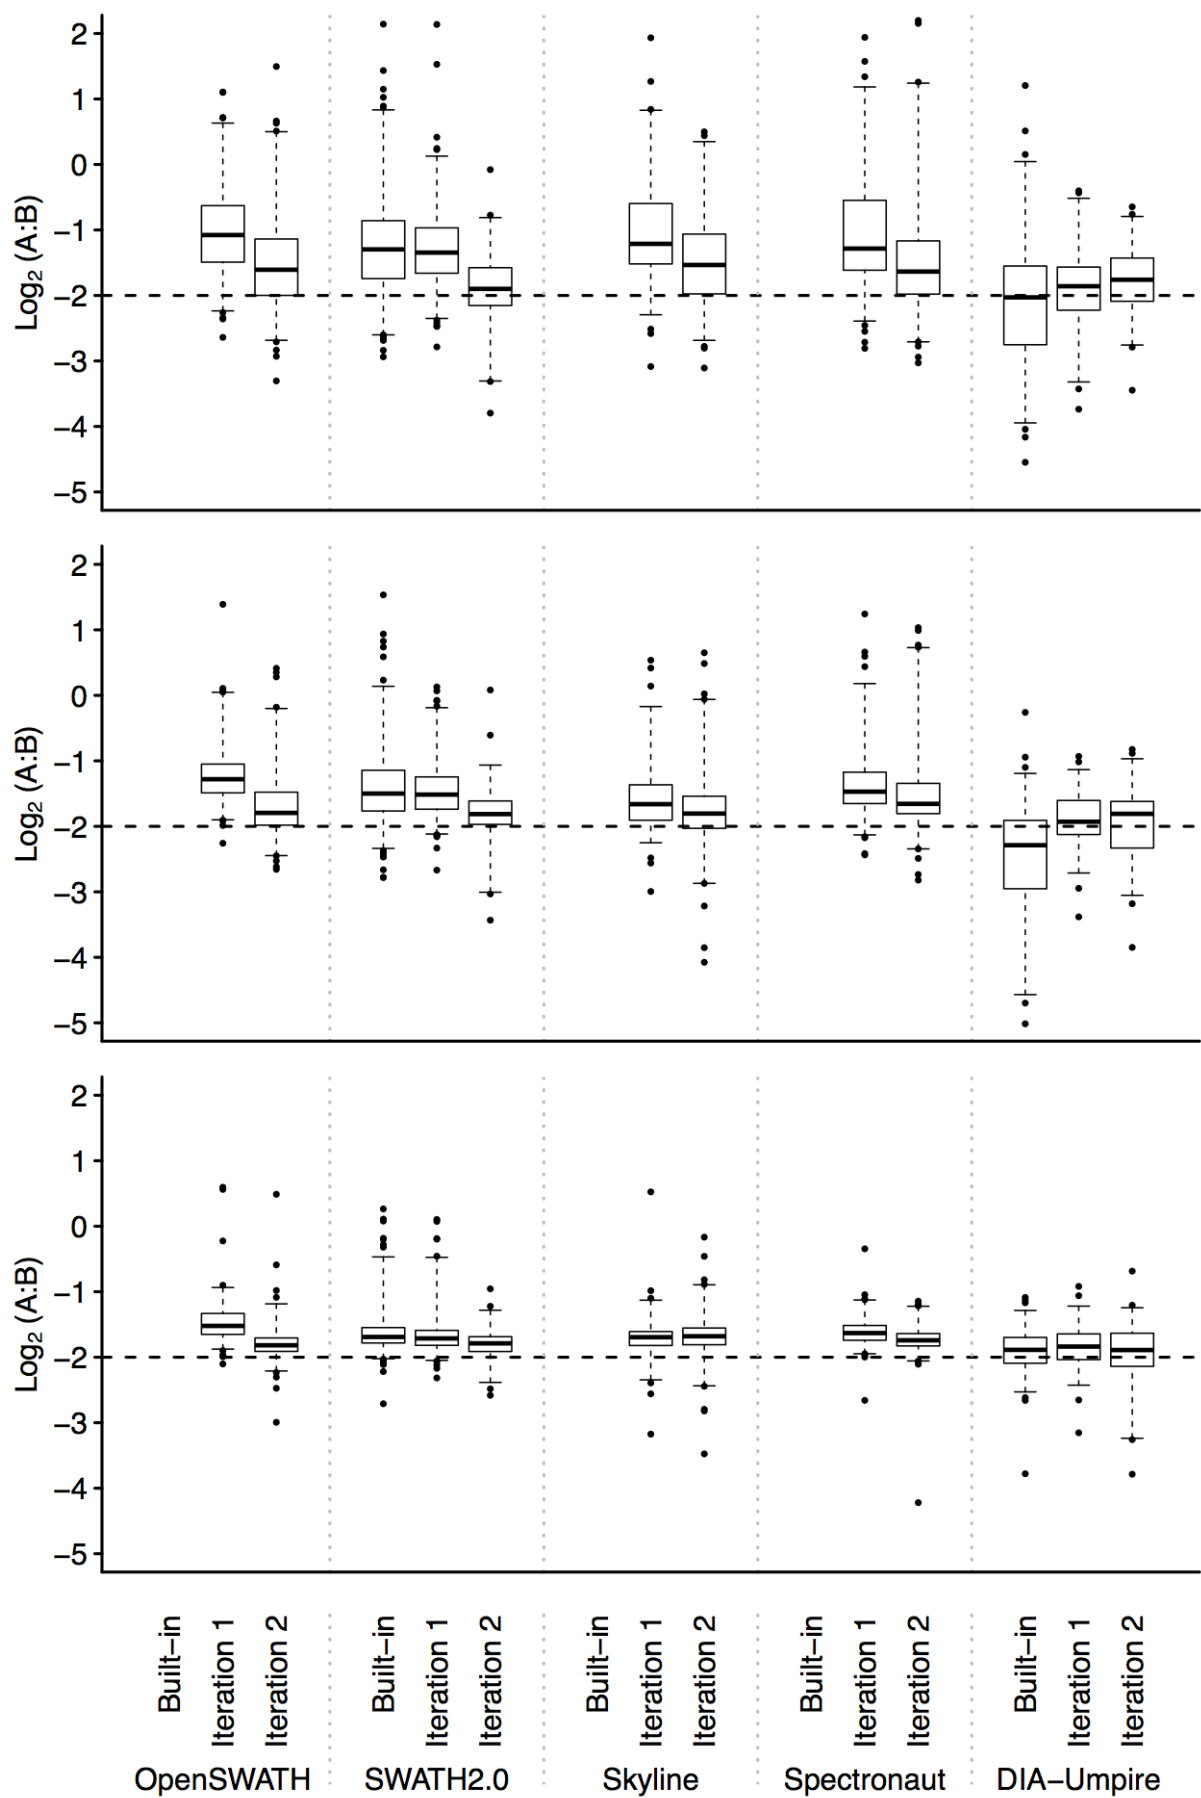

**Supplementary Figure 13.A:**  $\log_2$  ratio distributions in different intensity tertiles for E.coli proteins for HYE 124, TripleTOF 5600, 32fix setup.

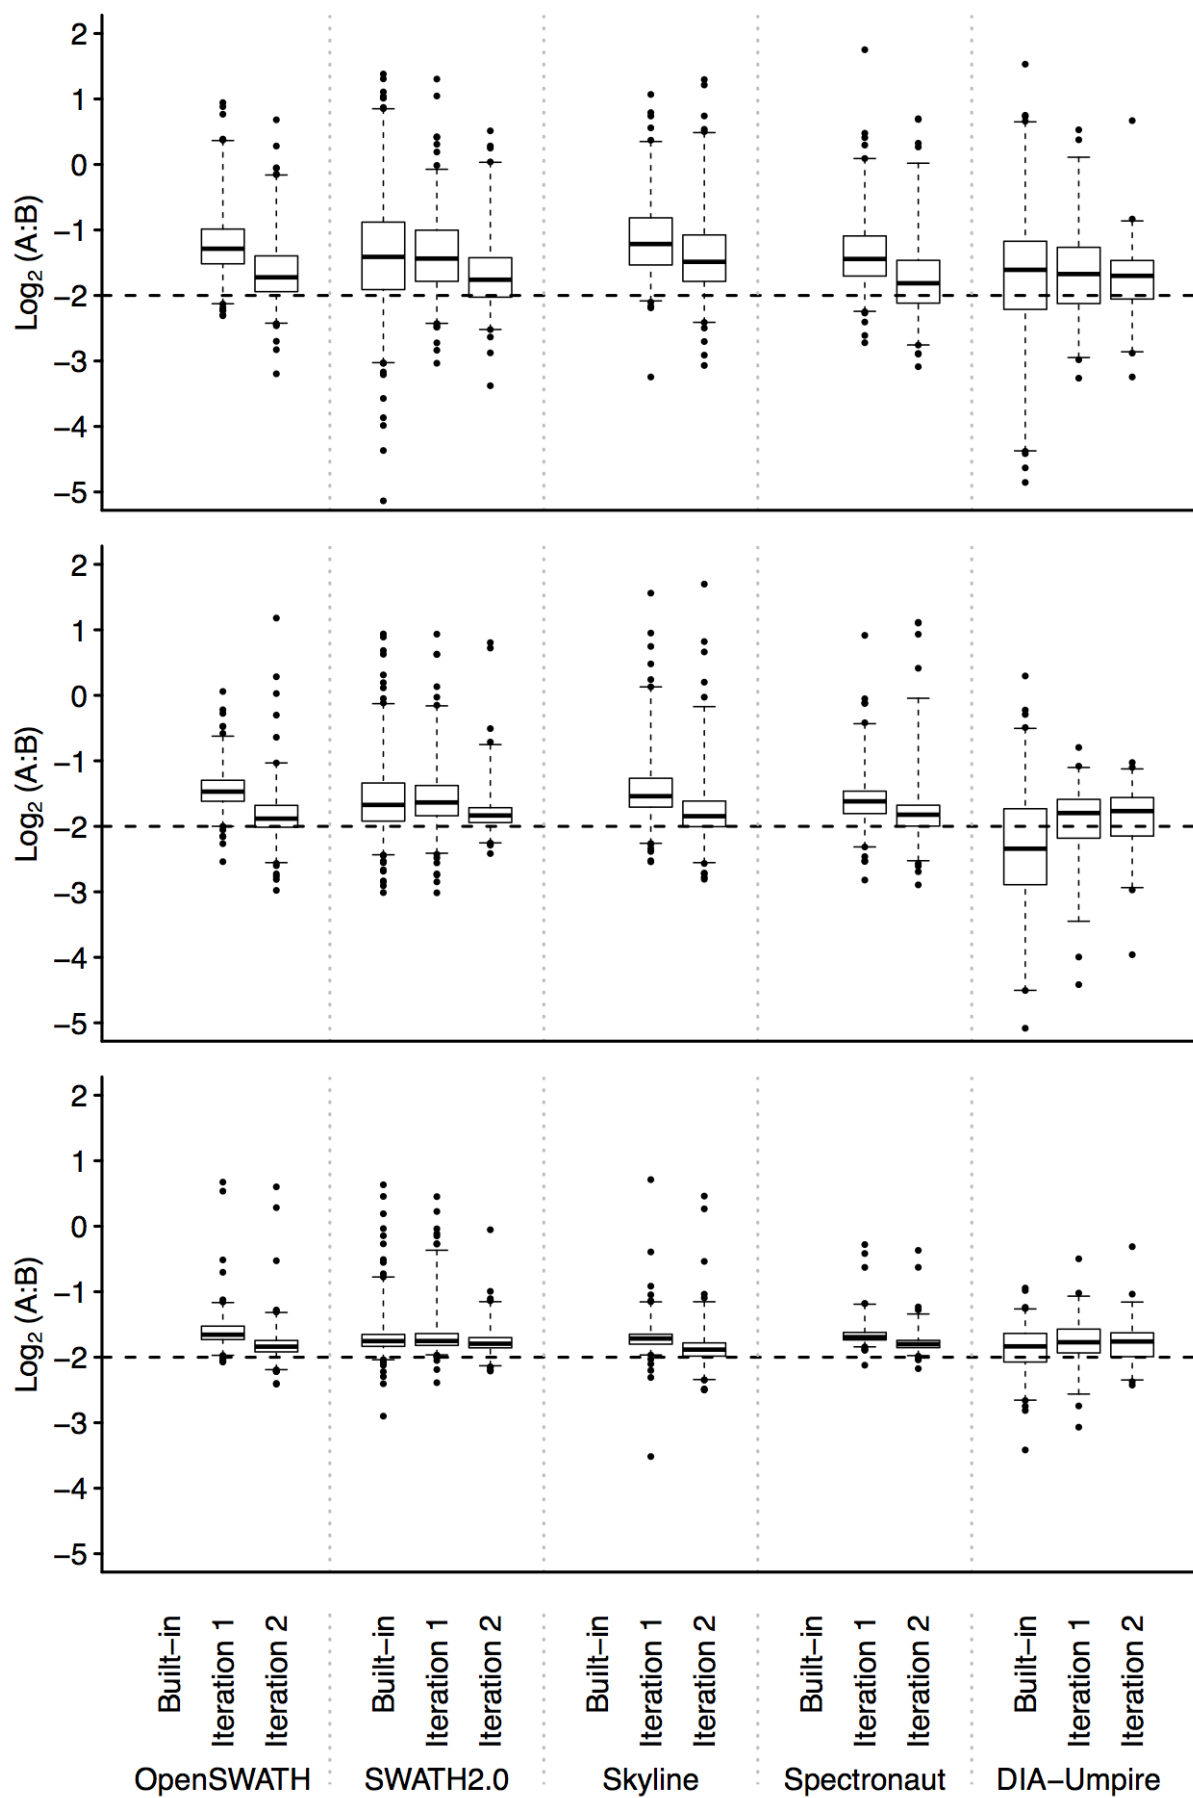

**Supplementary Figure 13.B:**  $\log_2$  ratio distributions in different intensity tertiles for E.coli proteins for HYE 124, TripleTOF 5600, 64var setup.

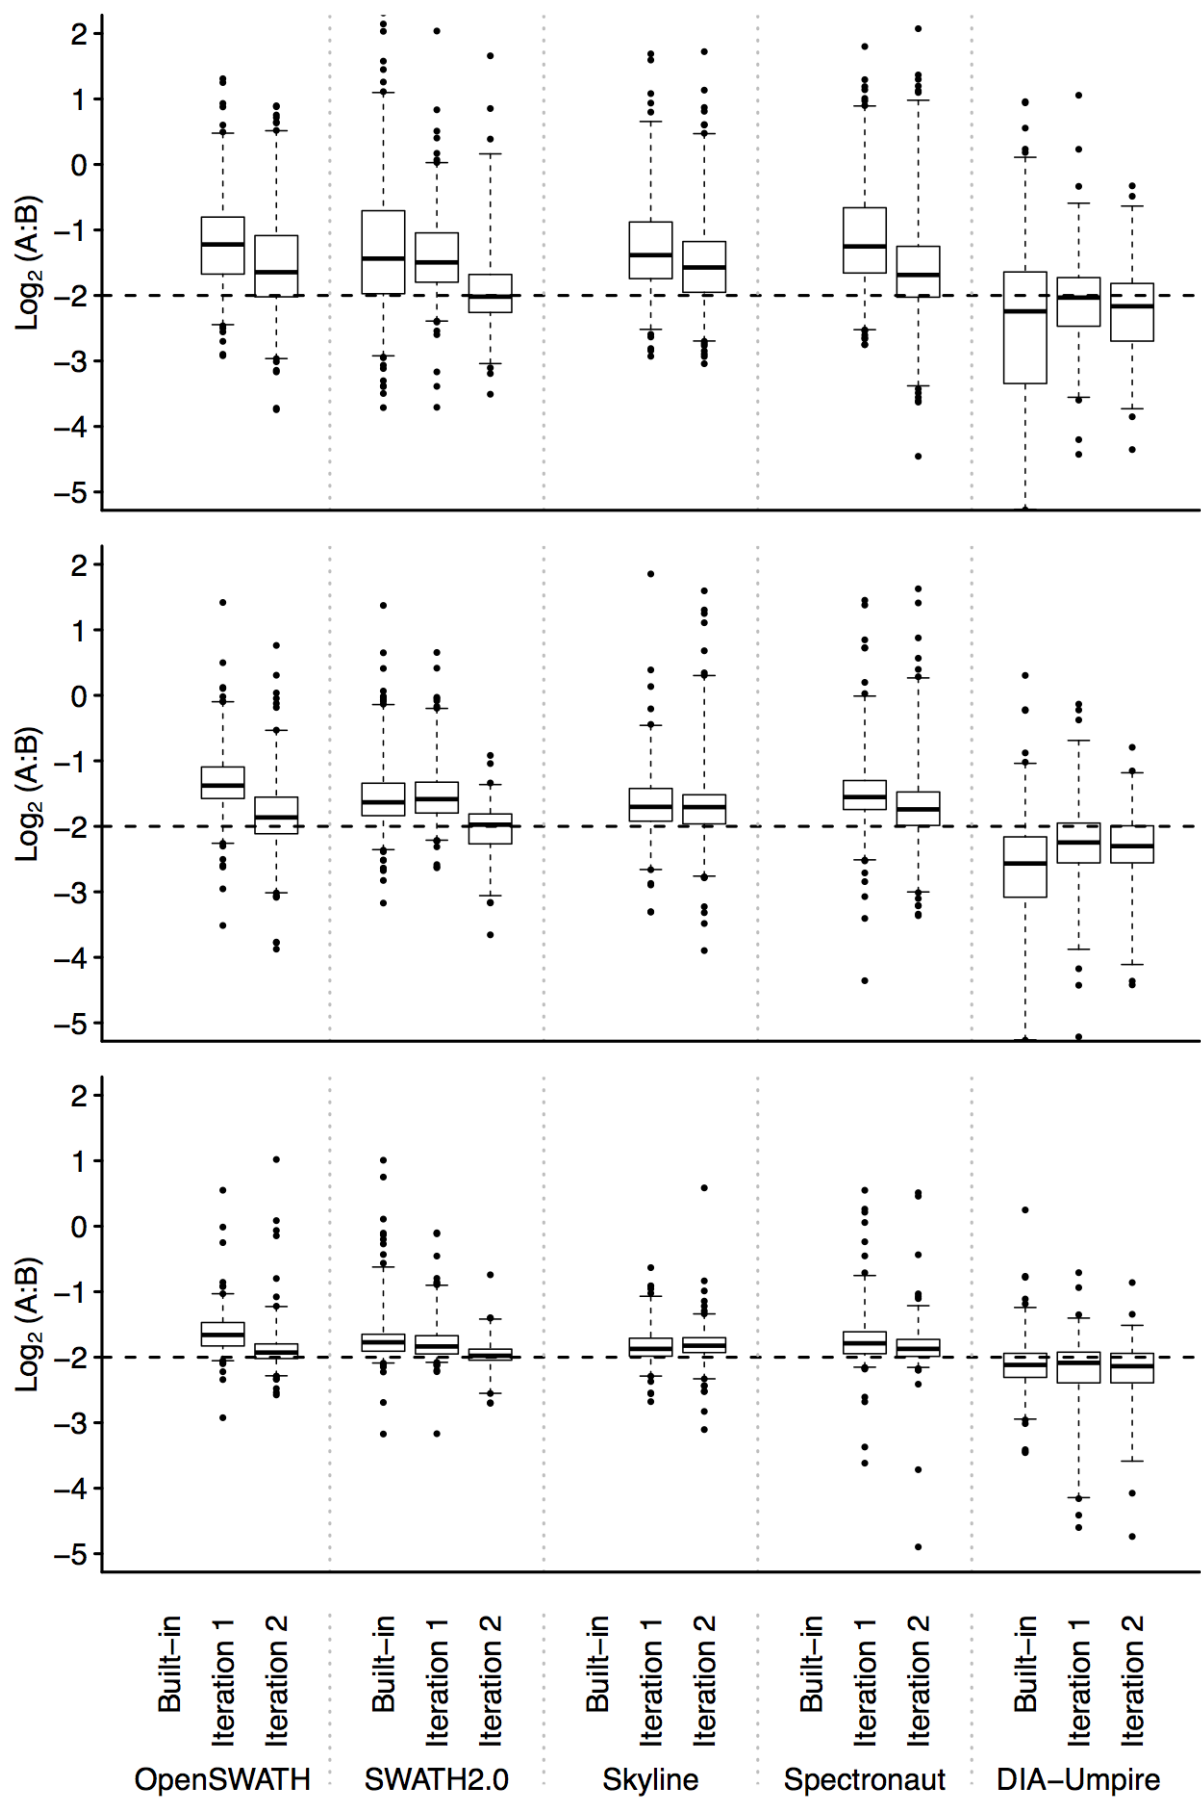

**Supplementary Figure 13.C:**  $\log_2$  ratio distributions in different intensity tertiles for E.coli proteins for HYE 124, TripleTOF 6600, 32fix setup.

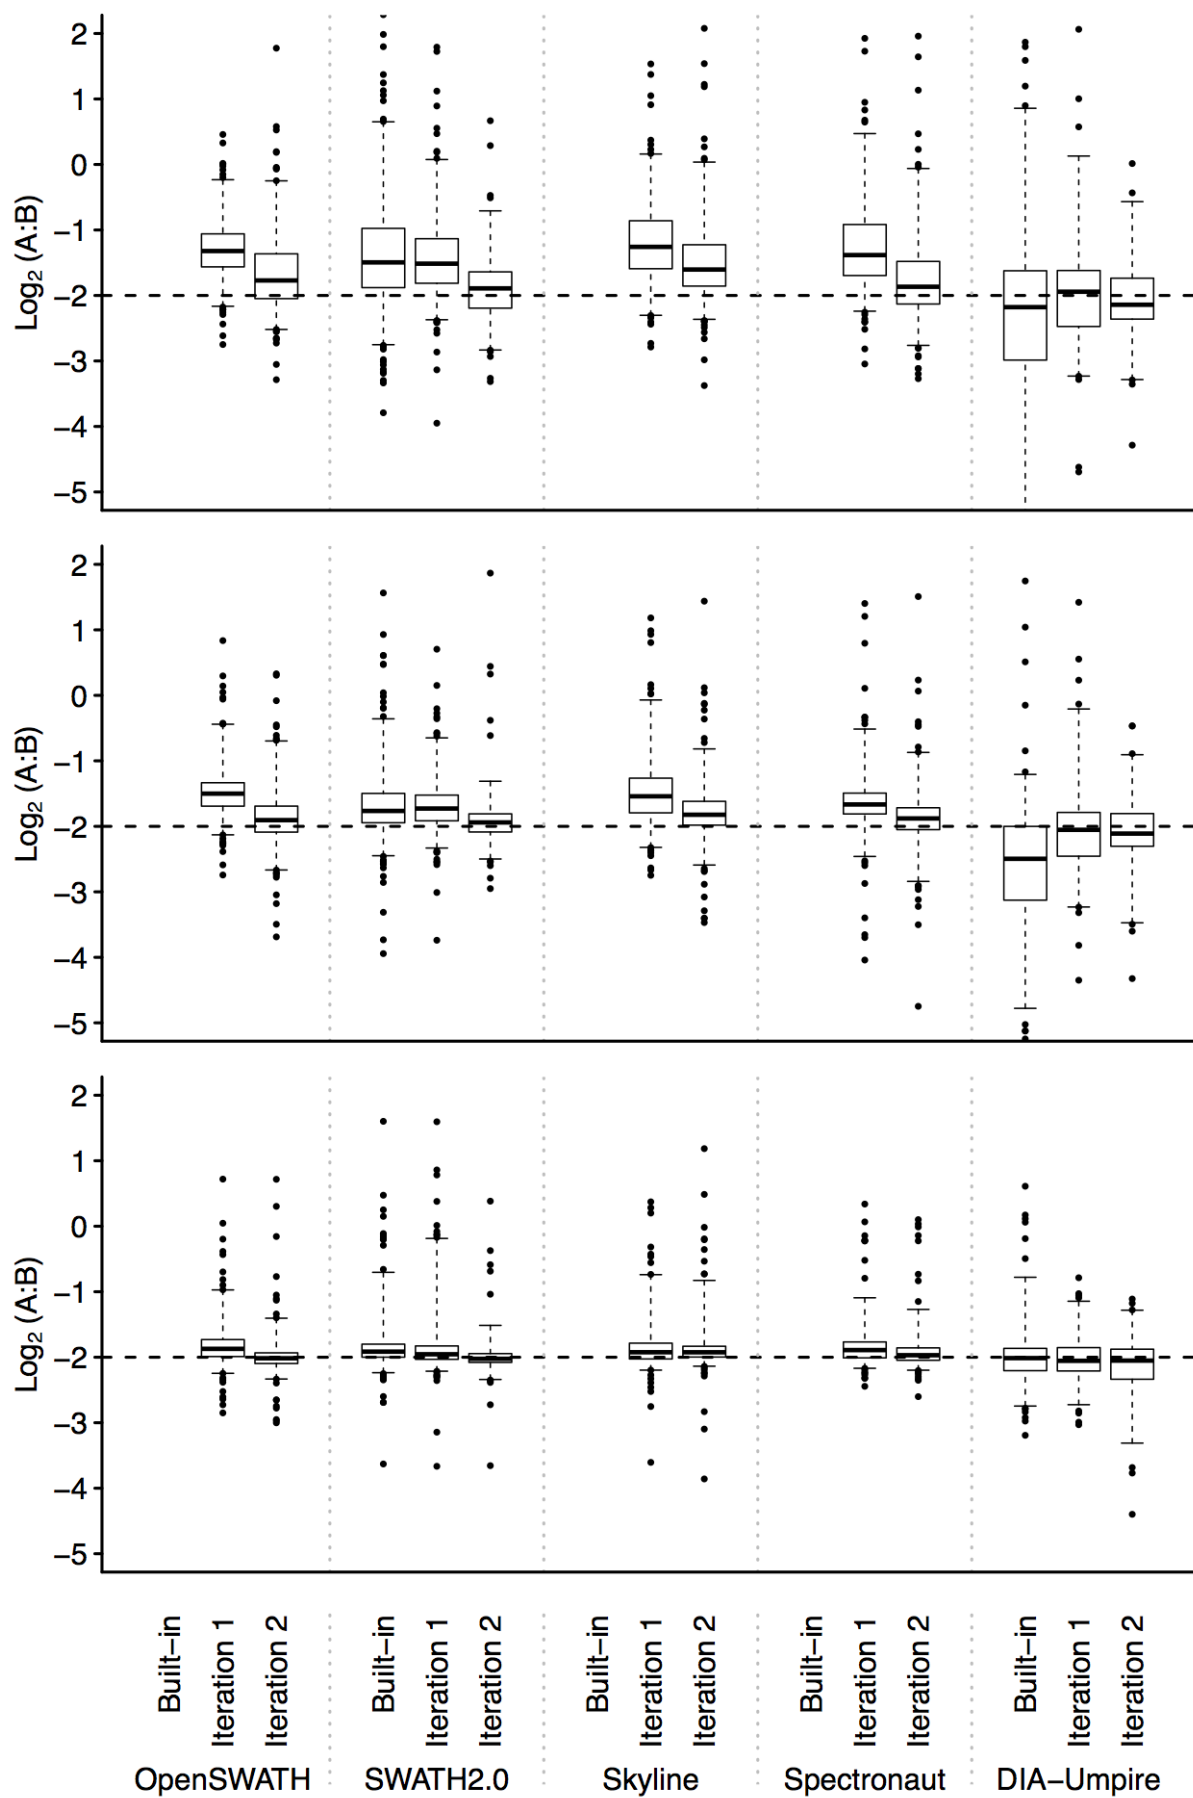

**Supplementary Figure 13.D:**  $\log_2$  ratio distributions in different intensity tertiles for E.coli proteins for HYE 124, TripleTOF 6600, 64var setup.



## Supplementary Figure 14. LFQbench protein level benchmarks for built-in protein level reports.

Protein quantities were estimated using built-in protein level quantification workflows in SWATH2.0 (panel A) and DIA-Umpire (panel B).

Log-transformed ratios ( $\log_2(A/B)$ ) of proteins were plotted for each benchmarked software tool over the log-transformed scaled intensity of sample B. Dashed colored lines represent the expected  $\log_2(A/B)$  values for human, yeast, and E.coli peptides. Black dashed lines represent the local trend along the x-axis of experimental log-transformed ratios of each population (human, yeast, and E.coli). In case of sample HYE124, panel A shows both iterations for all software tools, and panel B shows the  $\log_2(A/B)$  of the averages between technical replicates of A and B for E.coli peptides in the lowest intensity tertile. Boxes represent 25% and 75% percentiles, whiskers cover data points between 1% and 99% percentiles.

Intensities of multiply charged precursors were summed up, and averaged between technical replicates of each sample. Protein quantities were estimated in each technical replicate by the average of the most 3 intense peptides reported for each protein. Single hit proteins (a single peptide detected in a protein) and proteins detected in less than two injections in both samples A and B were discarded.

The following pages show LFQbench protein level benchmarks based on built-in protein level reports for:

- Supplementary Figure 14.A: HYE 124, TripleTOF 5600, 32fix setup
- Supplementary Figure 14.B: HYE 124, TripleTOF 5600, 64var setup
- Supplementary Figure 14.C: HYE 124, TripleTOF 6600, 32fix setup
- Supplementary Figure 14.D: HYE 124, TripleTOF 6600, 64var setup

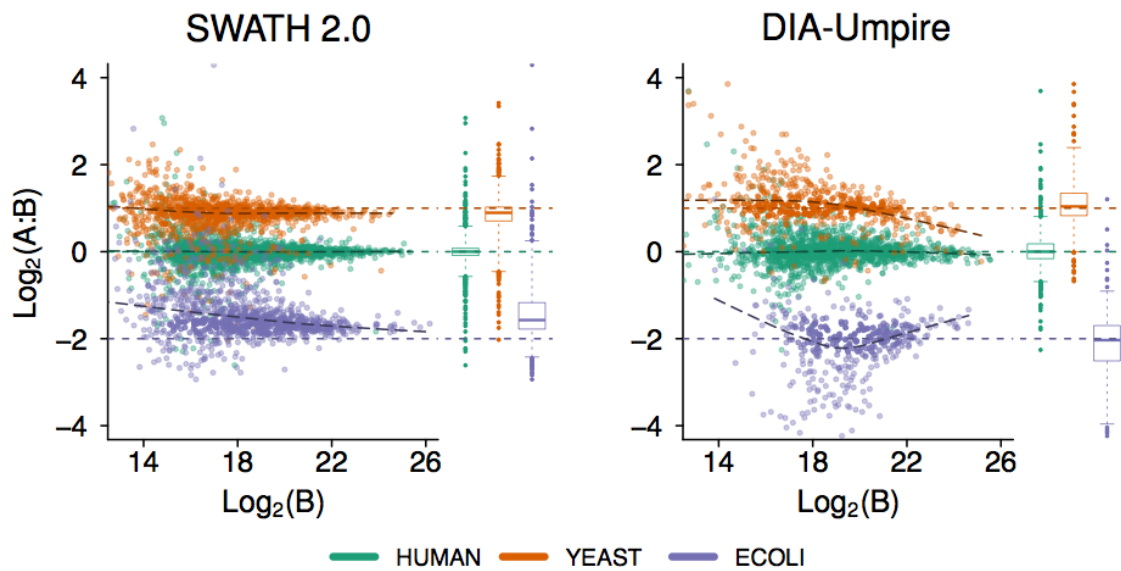

**Supplementary Figure 14.A:** LFQbench built-in protein level benchmarks for HYE 124, TripleTOF 5600, 32fix setup.

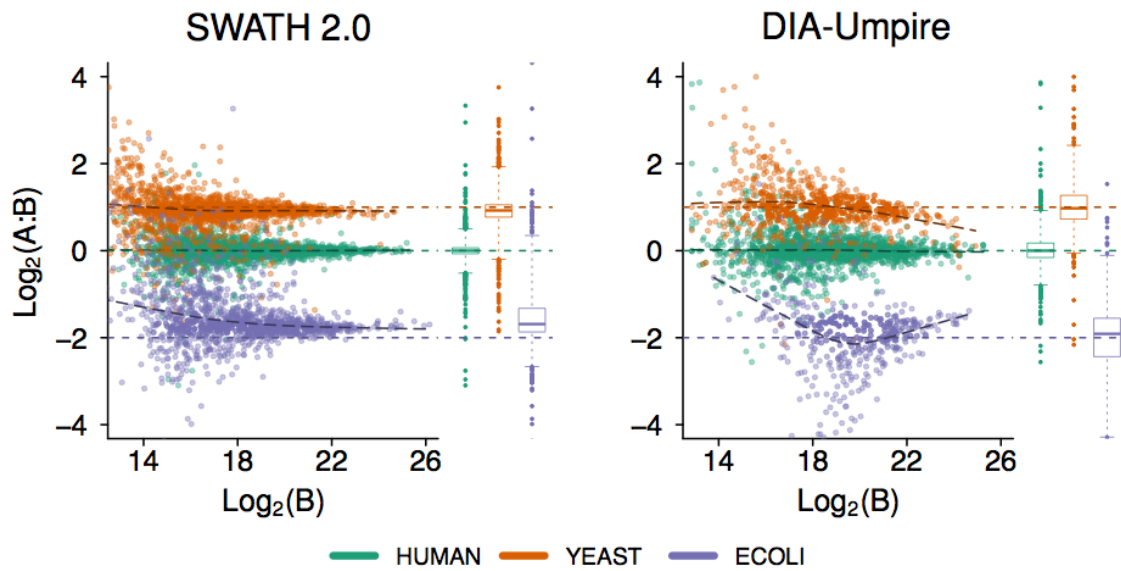

**Supplementary Figure 14.B:** LFQbench built-in protein level benchmarks for HYE 124, TripleTOF 5600, 64var setup.

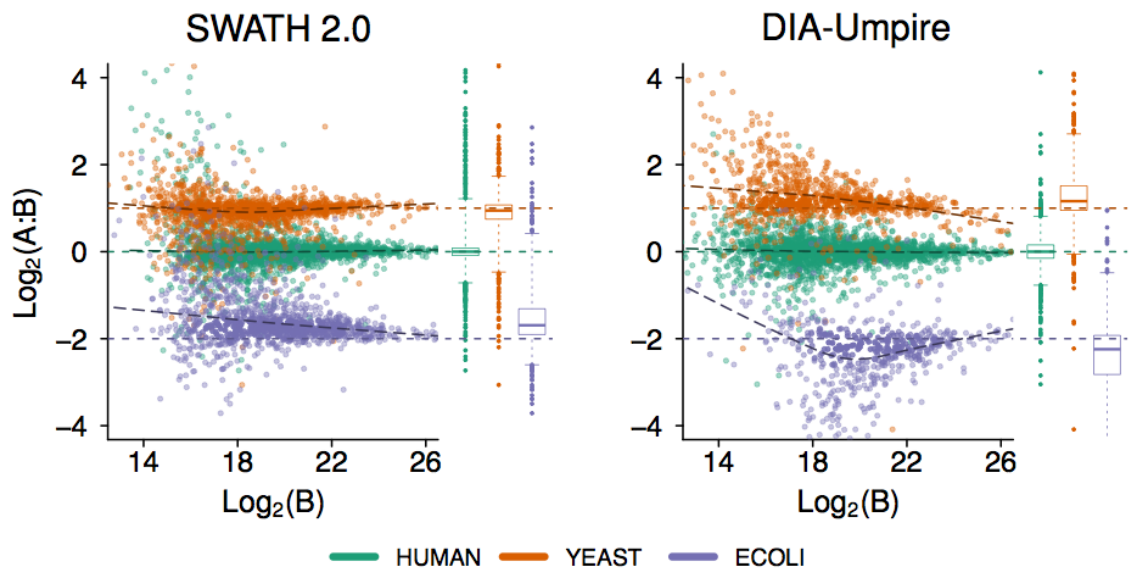

**Supplementary Figure 14.C:** LFQbench built-in protein level benchmarks for HYE 124, TripleTOF 6600, 32fix setup.

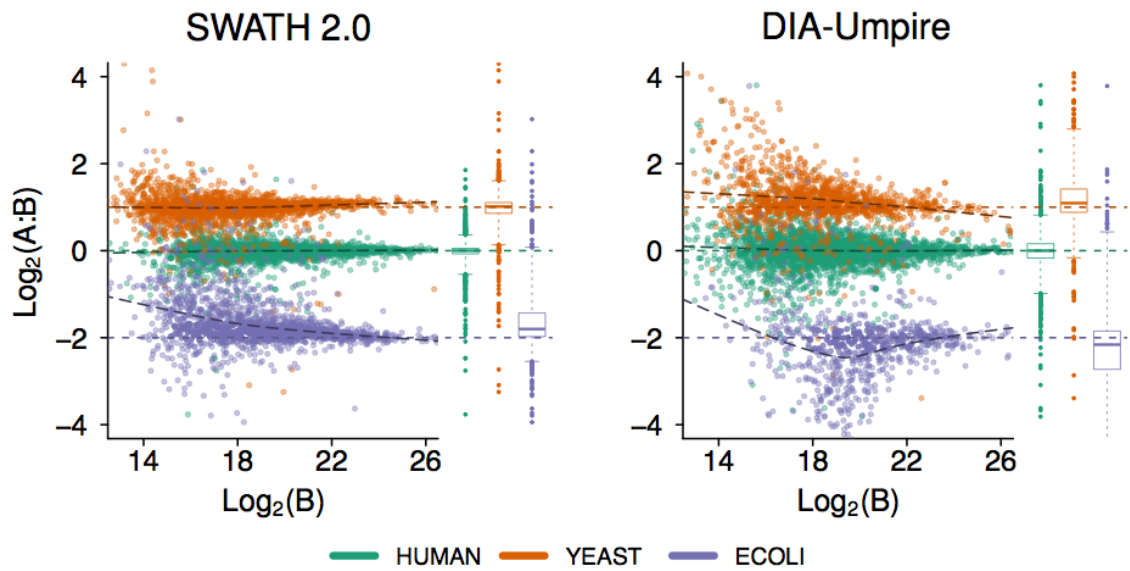

**Supplementary Figure 14.D:** LFQbench built-in protein level benchmarks for HYE 124, TripleTOF 6600, 64var setup.

## **Supplementary Figure 15. Retention time differences and correlation of reported peak intensities between all software tools for the first iteration.**

The present figure shows the retention time differences (upper right panels) and correlation of reported peak intensities (lower left panels) for the respective matching precursors between all software tools for the first iteration. Peak intensities and retention times reported by all software tools in HYE124 (64 variable windows) were compared pair-wise.

Outliers are plotted in the color of the outlier software tool (see color legend in the diagonal panels). Diagonal panels show the total number and percentage (to the total number of common detected peptides) of outliers of each respective software tool. Outliers have been defined as producing a standard deviation of the peak retention time greater than 0.2 minutes relative to all other software tools detecting that precursor, after removing ambiguous cases, in which more than one software tool produce a greater standard deviation in the peak retention time.

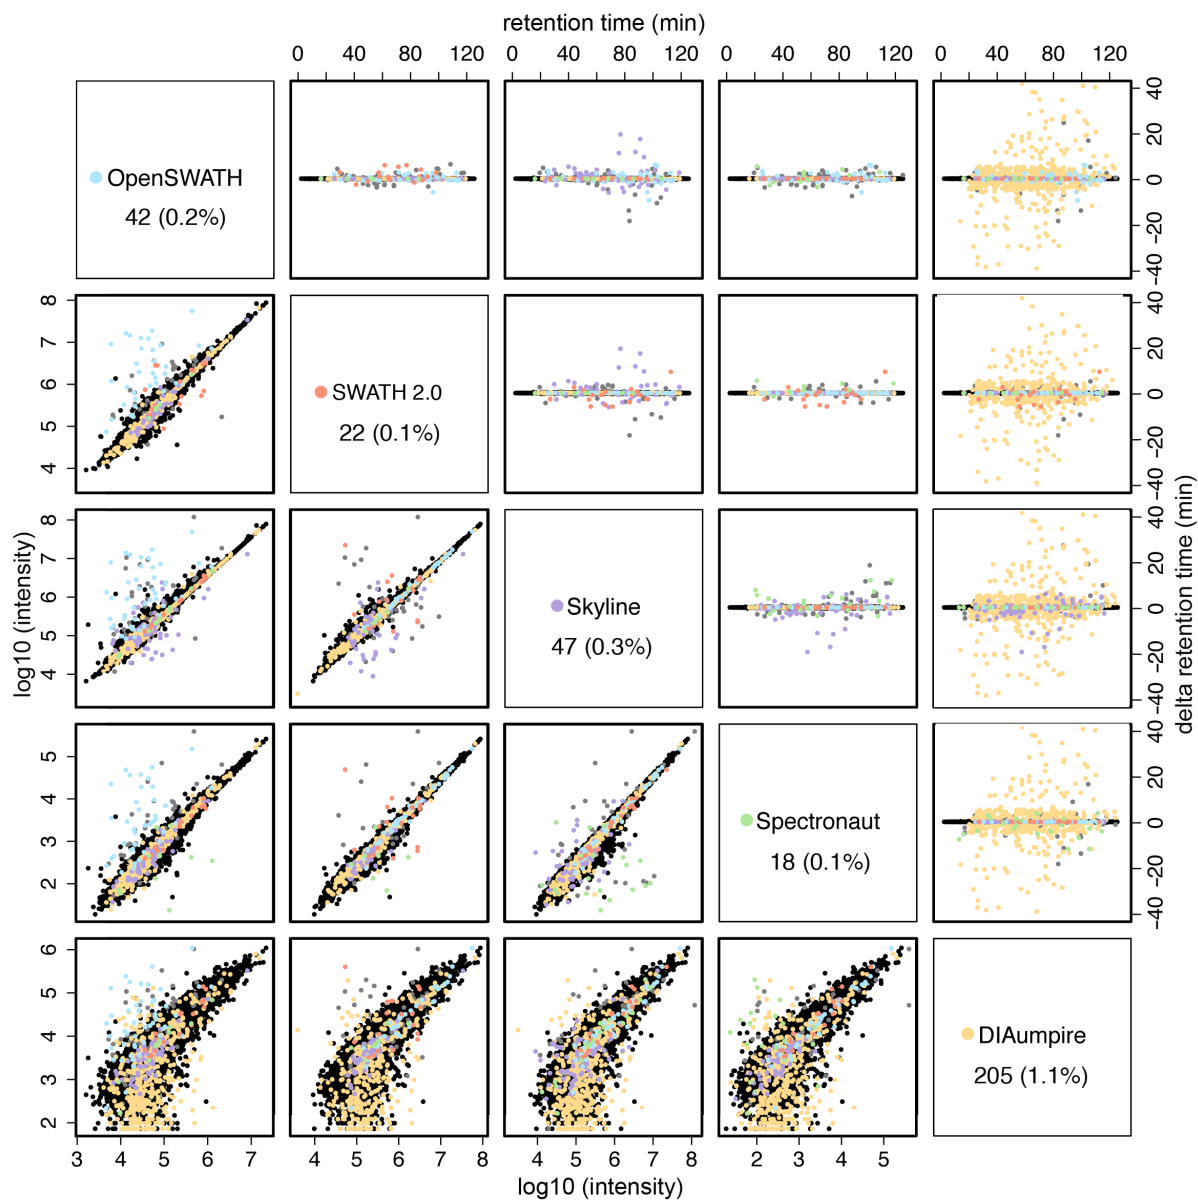

**Supplementary Figure 15:** Retention time differences (upper right panels) and correlation of reported peak intensities (lower left panels) between all software tools for the respective matching precursors for the first iteration of all tools.

## Supplementary Figure 16. Comparative analysis of fragment intensity rankings between DIA-Umpire and the library.

For each fragment reported by DIA-Umpire the respective intensity ranking in the spectral library was determined. In the first iteration (left panel), 39% of the fragment ions reported by DIA-Umpire are not part of the library (grey). The agreement between the other DIA-Umpire's fragment ions and the spectral library is good (70% of the three most intense fragment ions of DIA-Umpire match with the three most intense fragment ions of the spectral library). After removing low mass fragments (<350 m/z) the percentage of unmatched ion fragments to the spectral library was reduced to 24%.

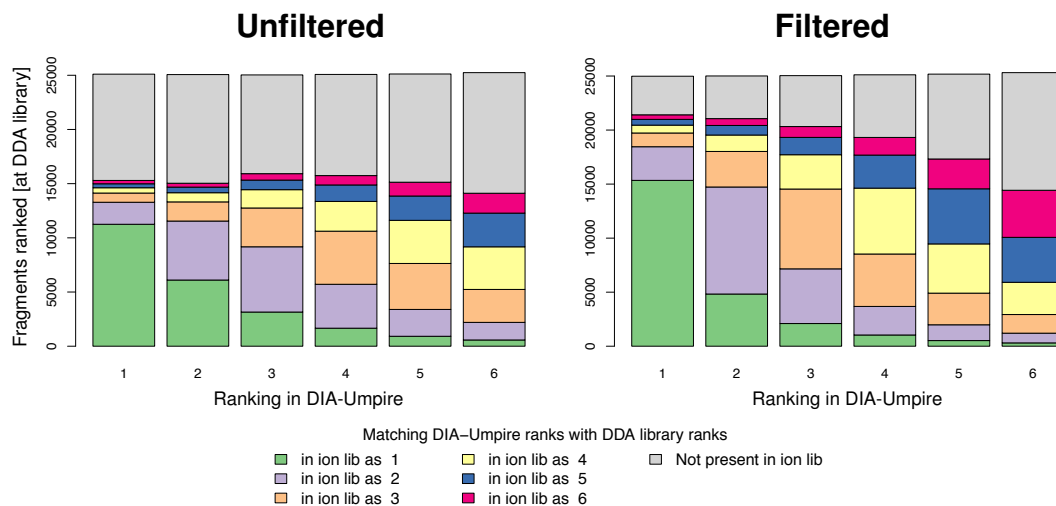

**Supplementary Figure 16:** Comparative analysis of fragment intensity ranking between DIA-Umpire and the library.

## Supplementary Figure 17. Number of incomplete cases.

The percentage of the number of peptides or proteins with less than six quantification values among the six injections (three technical replicates by sample) is shown in the present figure. Of note, yeast and E.coli proteins reported more incomplete cases in HYE110 than in HYE124 due to its more challenging composition (1:10 ratios instead of 1:2 or 1:4 ratios).

The following pages show number of incomplete cases for:

- Supplementary Figure 17.A: HYE 124, TripleTOF 5600, 32fix setup
- Supplementary Figure 17.B: HYE 124, TripleTOF 5600, 64var setup
- Supplementary Figure 17.C: HYE 124, TripleTOF 6600, 32fix setup
- Supplementary Figure 17.D: HYE 124, TripleTOF 6600, 64var setup
- Supplementary Figure 17.E: HYE 110, TripleTOF 6600, 32fix setup
- Supplementary Figure 17.F: HYE 110, TripleTOF 6600, 32var setup
- Supplementary Figure 17.G: HYE 110, TripleTOF 6600, 64fix setup
- Supplementary Figure 17.H: HYE 110, TripleTOF 6600, 64var setup

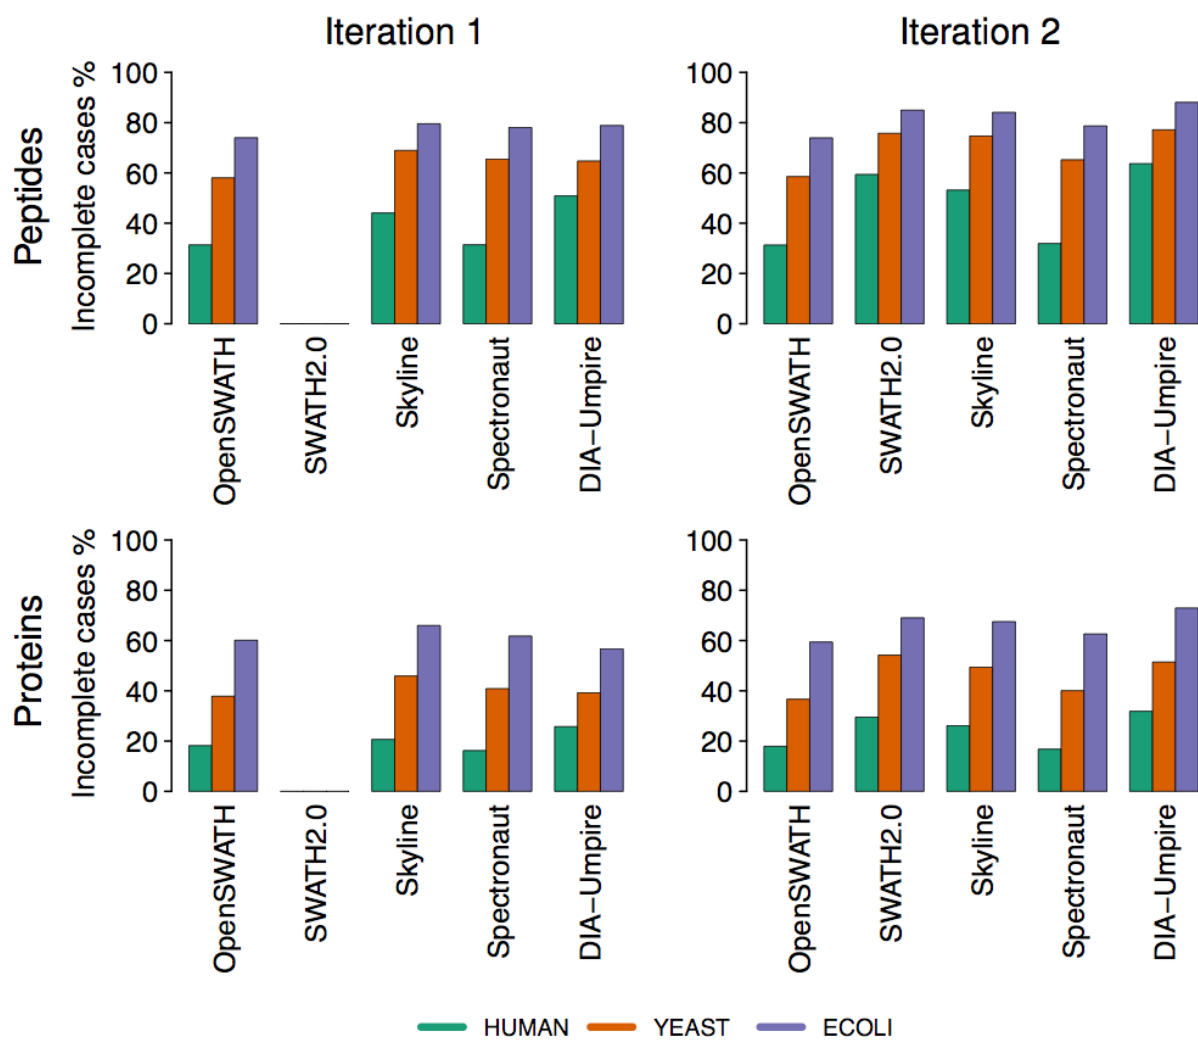

Supplementary Figure 17.A: Number of incomplete cases for HYE 124, TripleTOF 5600, 32fix setup.



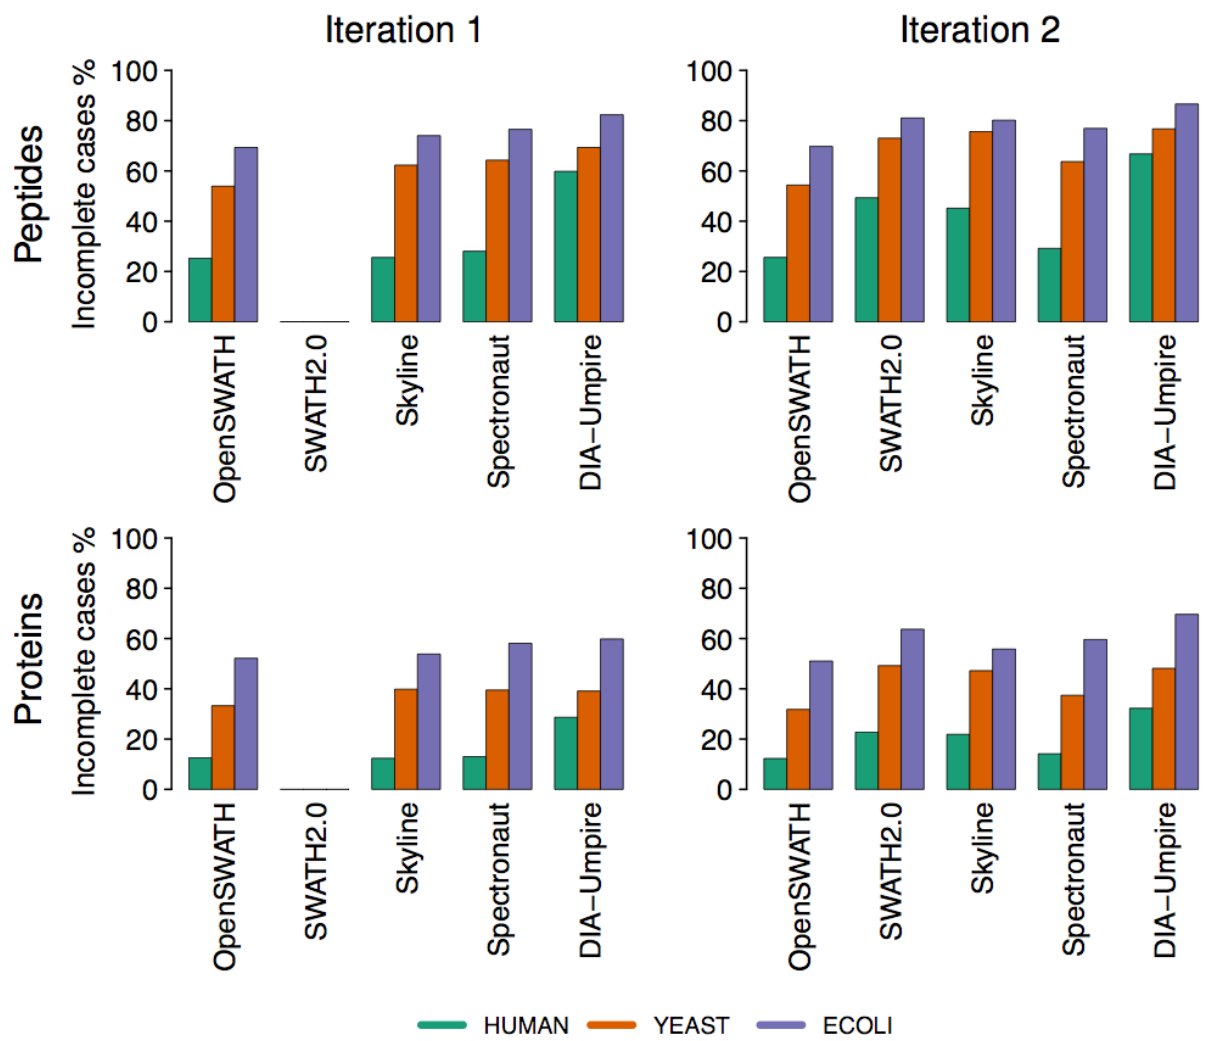

Supplementary Figure 17.B: Number of incomplete cases for HYE 124, TripleTOF 5600, 64var setup.

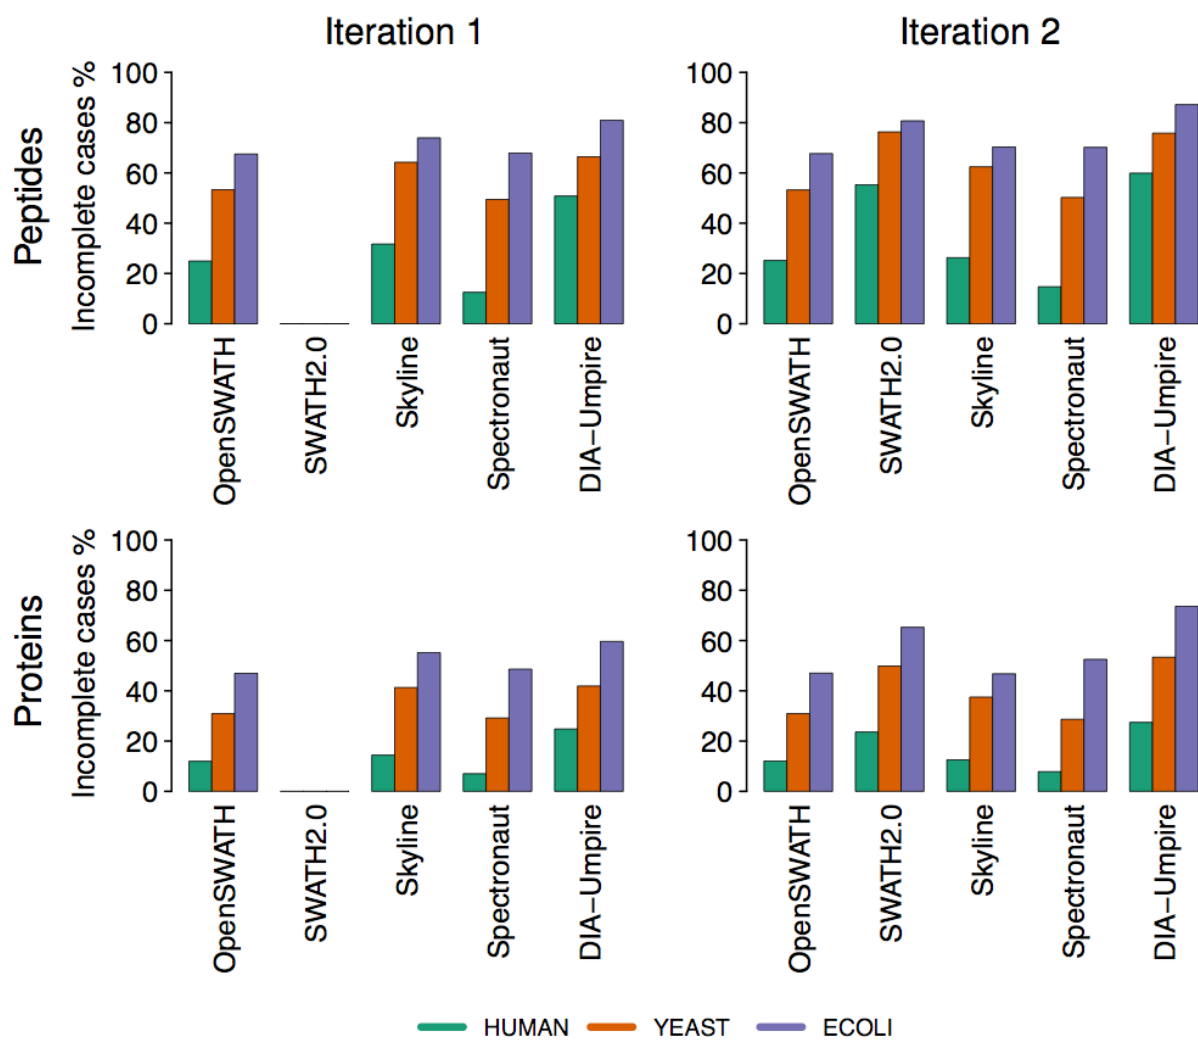

Supplementary Figure 17.C: Number of incomplete cases for HYE 124, TripleTOF 6600, 32fix setup.

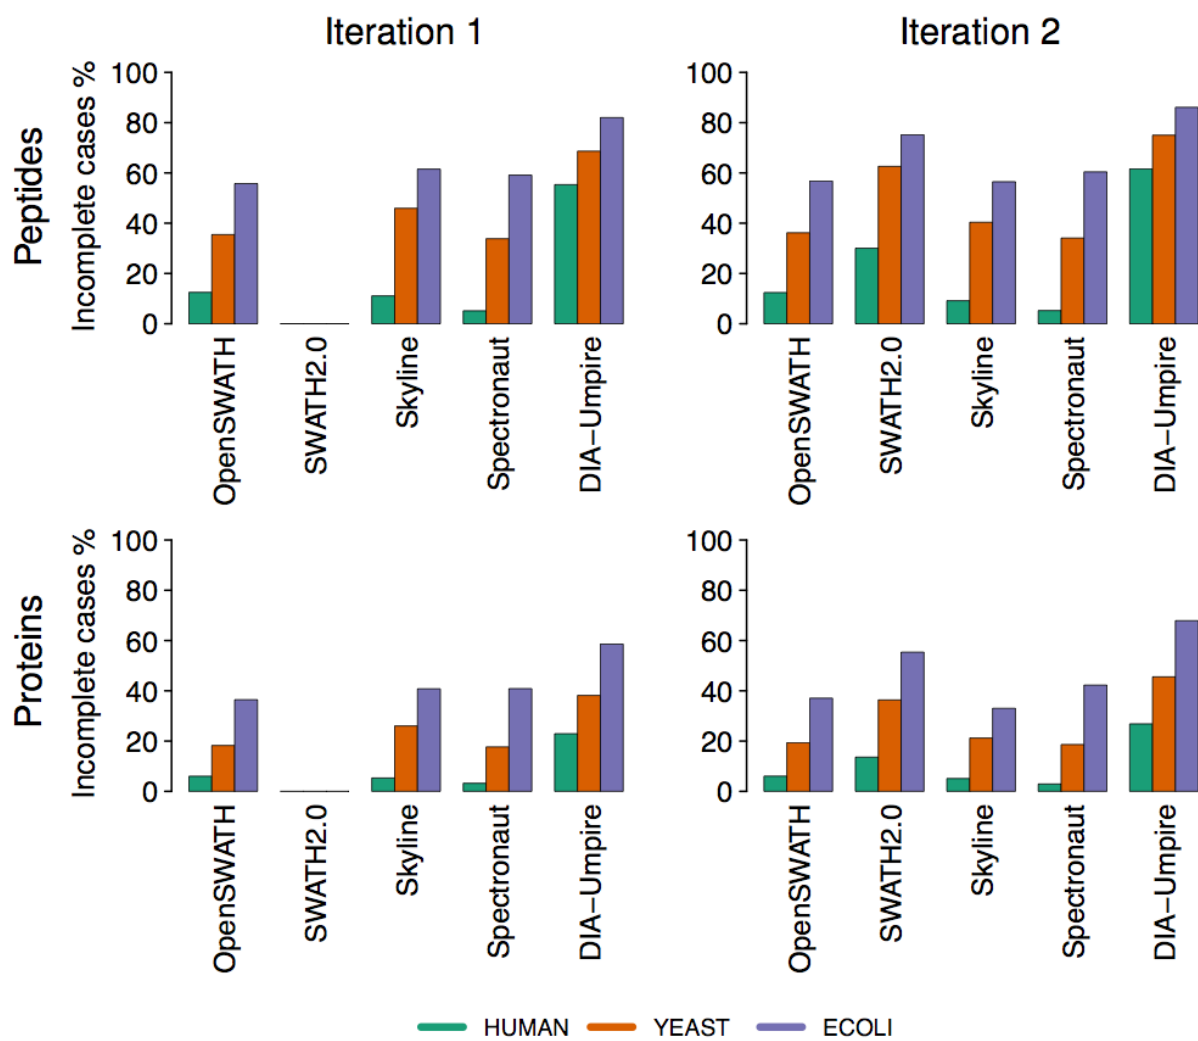

Supplementary Figure 17.D: Number of incomplete cases for HYE 124, TripleTOF 6600, 64var setup.

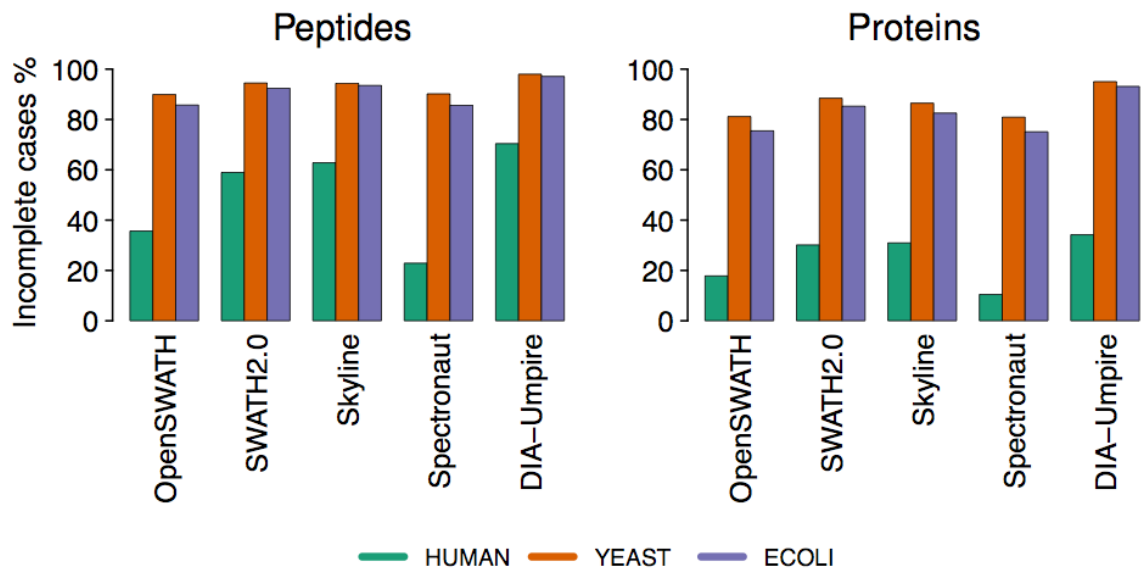

**Supplementary Figure 17.E:** Number of incomplete cases for HYE 110, TripleTOF 6600, 32fix setup.

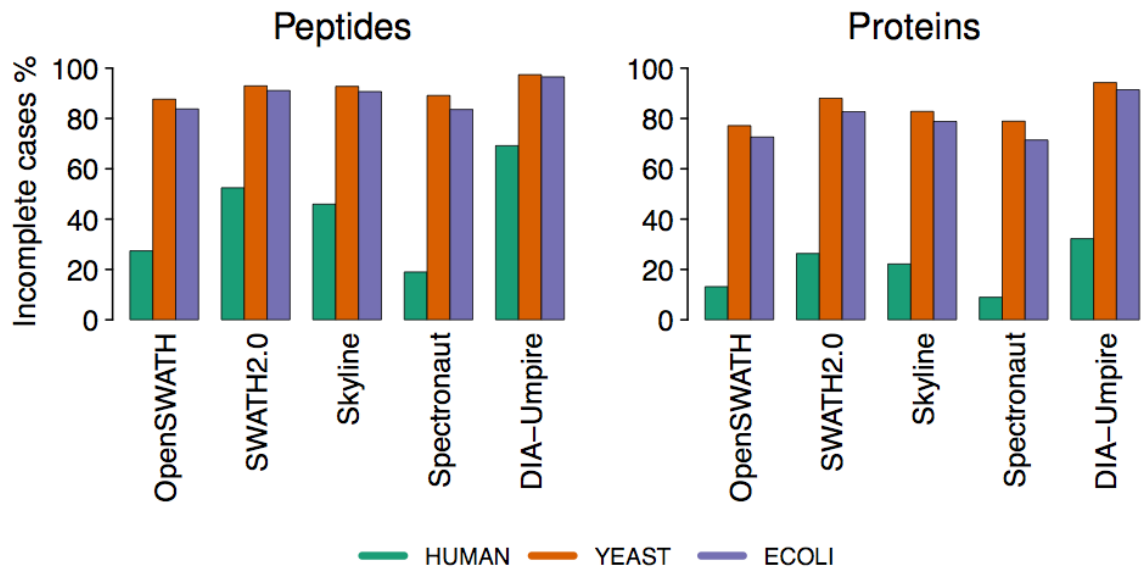

**Supplementary Figure 17.F:** Number of incomplete cases for HYE 110, TripleTOF 6600, 32var setup.

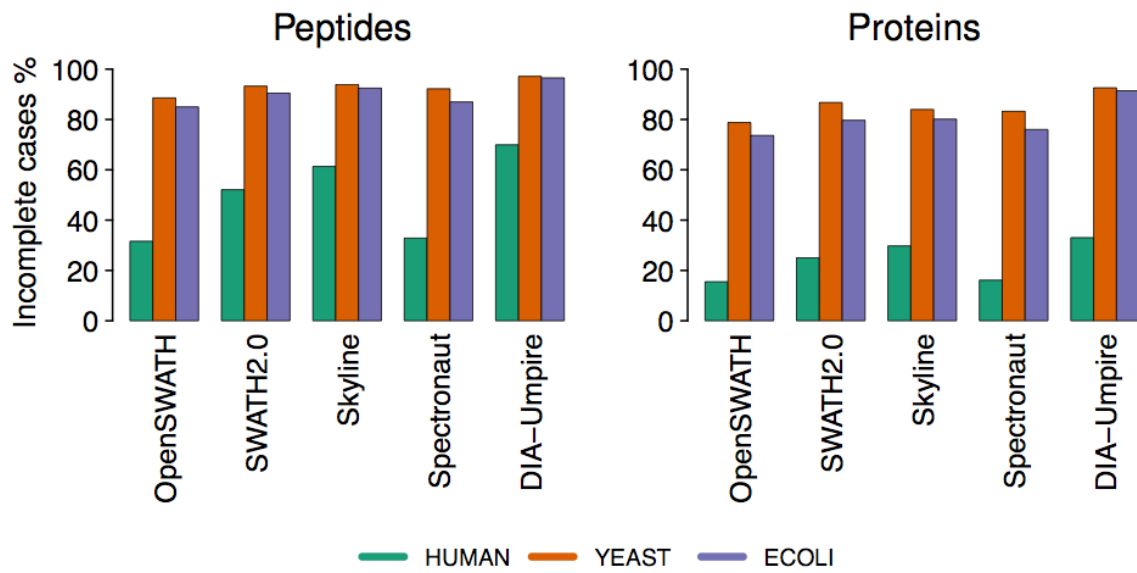

**Supplementary Figure 17.G:** Number of incomplete cases for HYE 110, TripleTOF 6600, 64fix setup.

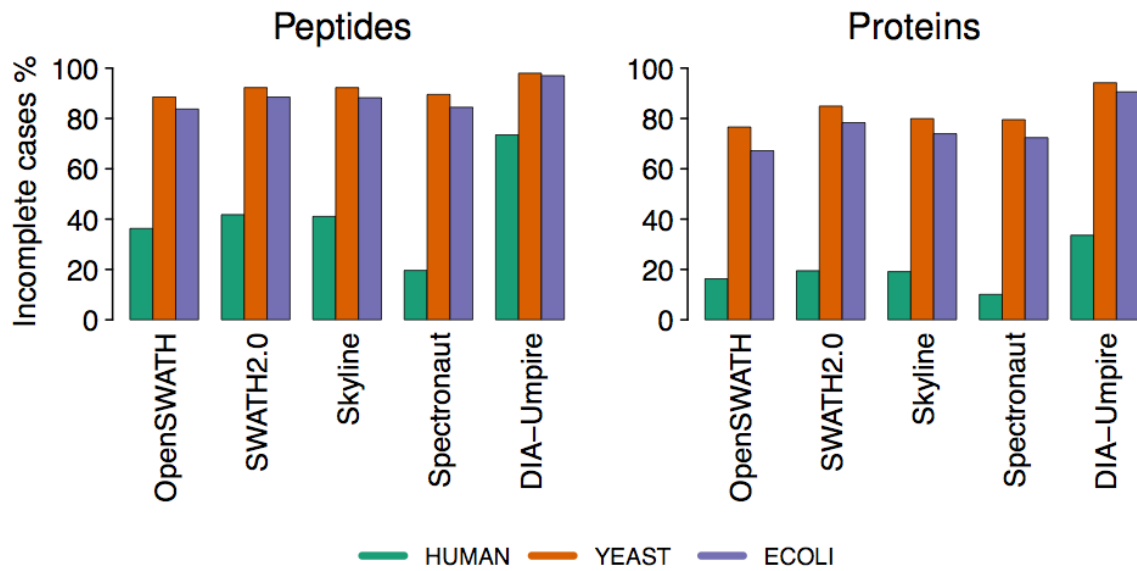

**Supplementary Figure 17.H:** Number of incomplete cases for HYE 110, TripleTOF 6600, 64var setup.

**Supplementary Figure 18. Percentage of false negative human proteins (human proteins detected in only one of the samples) in the second iteration with replication rate filtering.**

According to sample composition, human proteins should always be detectable in both samples (A and B). Human proteins that are false-negative in one of the samples (and thus falsely reported as “exclusively detected” in the other samples) are highly problematic from a biological perspective. The data indicate that requiring a protein to be quantified in at least two biological replicates (bar plots group by number of technical replicates – runs – the peptide or protein is detected in the other sample) reduces the false negative rate by up to 70%, depending on instrument, software and SWATH window setup.

The plots show the percentage of false negative identifications after filtering those identifications, which were found in less than two technical replicates in both samples A and B (Supplementary Figure 12 shows unfiltered data).

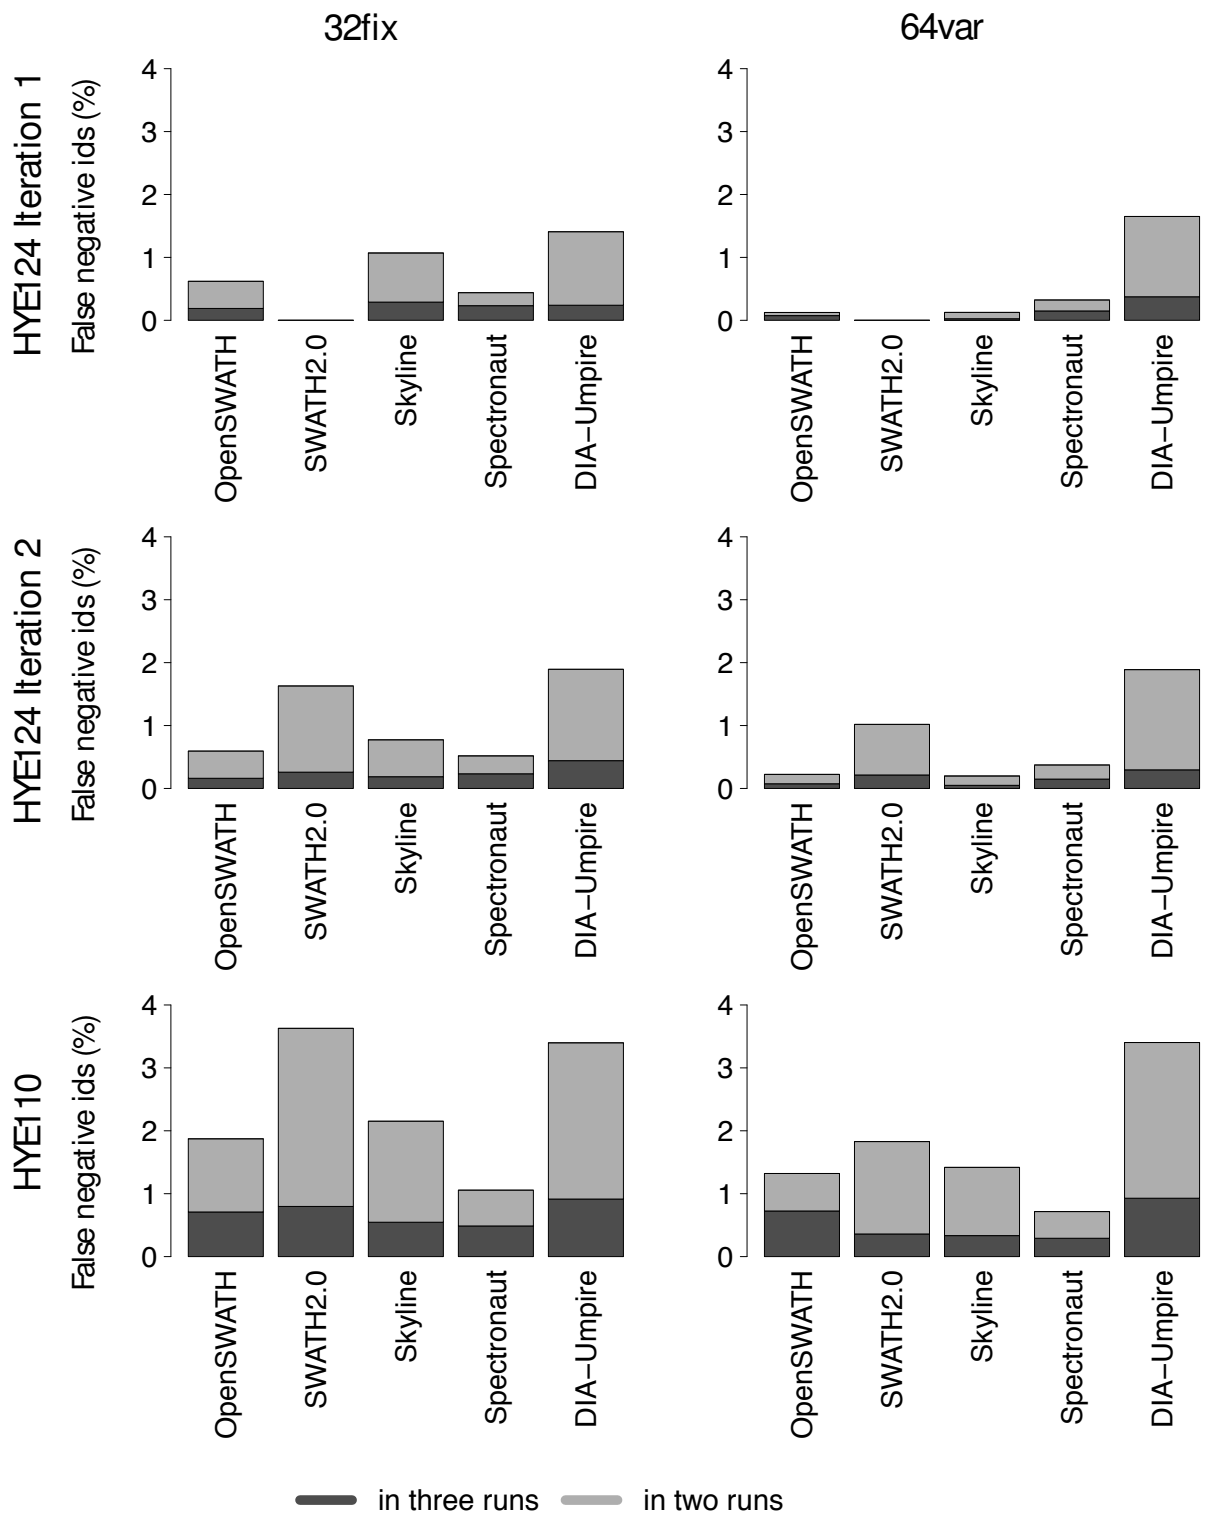

**Supplementary Figure 18:** Percentage of false negative human proteins (human proteins detected in only one of the samples) in the second iteration with replication rate filtering.

## Supplementary Figure 19. Number of quantified peptides per protein.

The following pages show the numbers of quantified peptides per protein for:

- Supplementary Figure 19.A: HYE 124, TripleTOF 5600, 32fix setup, iteration 1
- Supplementary Figure 19.B: HYE 124, TripleTOF 5600, 64var setup, iteration 1
- Supplementary Figure 19.C: HYE 124, TripleTOF 6600, 32fix setup, iteration 1
- Supplementary Figure 19.D: HYE 124, TripleTOF 6600, 64var setup, iteration 1
- Supplementary Figure 19.E: HYE 124, TripleTOF 5600, 32fix setup, iteration 2
- Supplementary Figure 19.F: HYE 124, TripleTOF 5600, 64var setup, iteration 2
- Supplementary Figure 19.G: HYE 124, TripleTOF 6600, 32fix setup, iteration 2
- Supplementary Figure 19.H: HYE 124, TripleTOF 6600, 64var setup, iteration 2
- Supplementary Figure 19.I: HYE 110, TripleTOF 6600, 32fix setup
- Supplementary Figure 19.J: HYE 110, TripleTOF 6600, 32var setup
- Supplementary Figure 19.K: HYE 110, TripleTOF 6600, 64fix setup
- Supplementary Figure 19.L: HYE 110, TripleTOF 6600, 64var setup



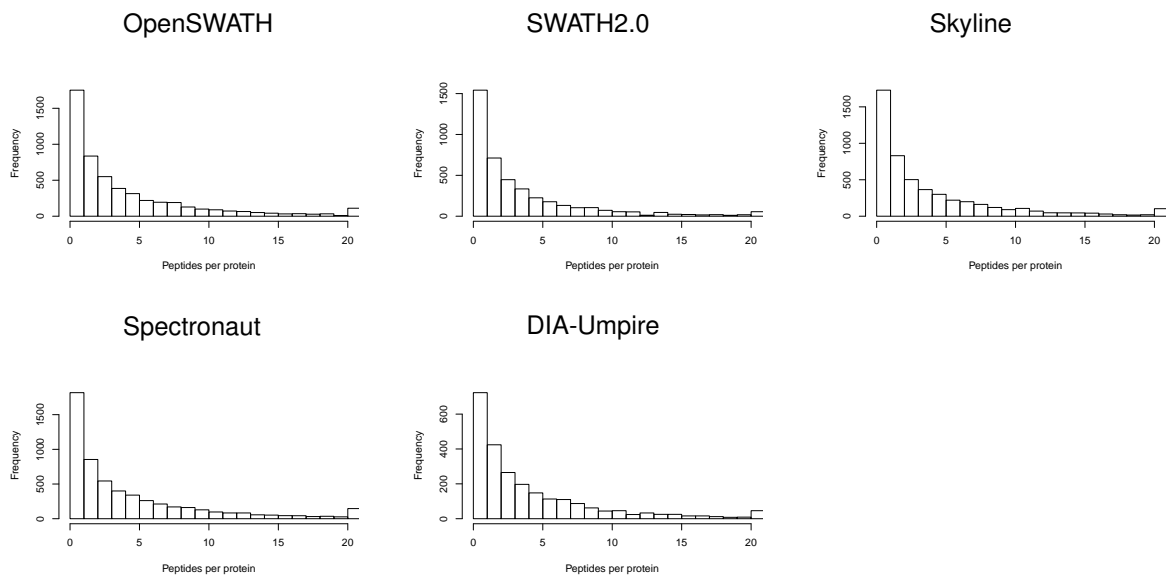

**Supplementary Figure 19.A:** Number of quantified peptides per protein for HYE 124, TripleTOF 5600, 32fix setup, iteration 1.

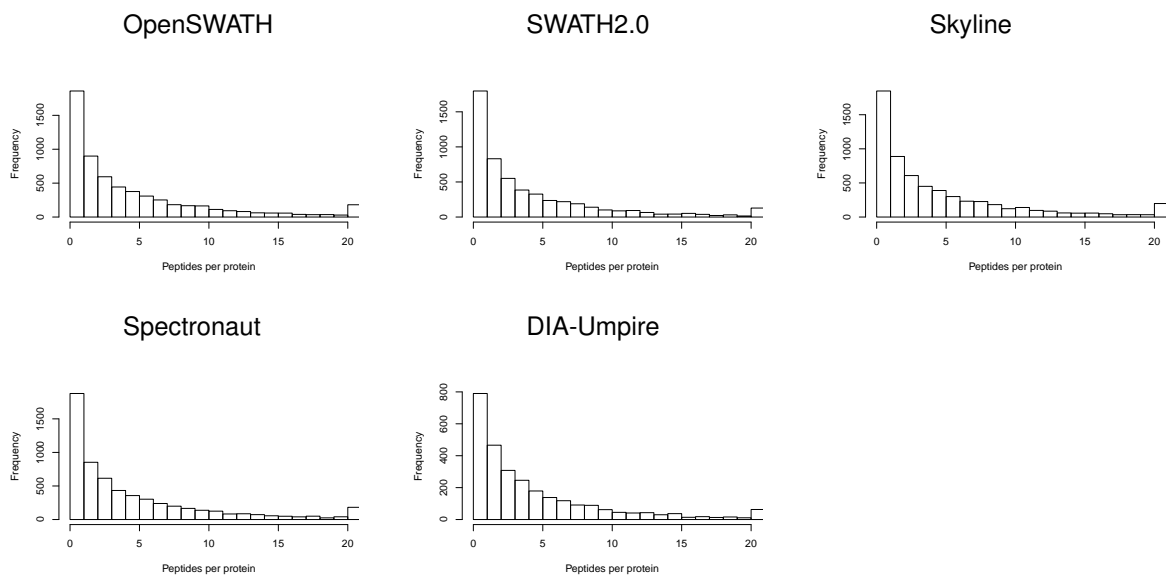

**Supplementary Figure 19.B:** Number of quantified peptides per protein for HYE 124, TripleTOF 5600, 64var setup, iteration 1.

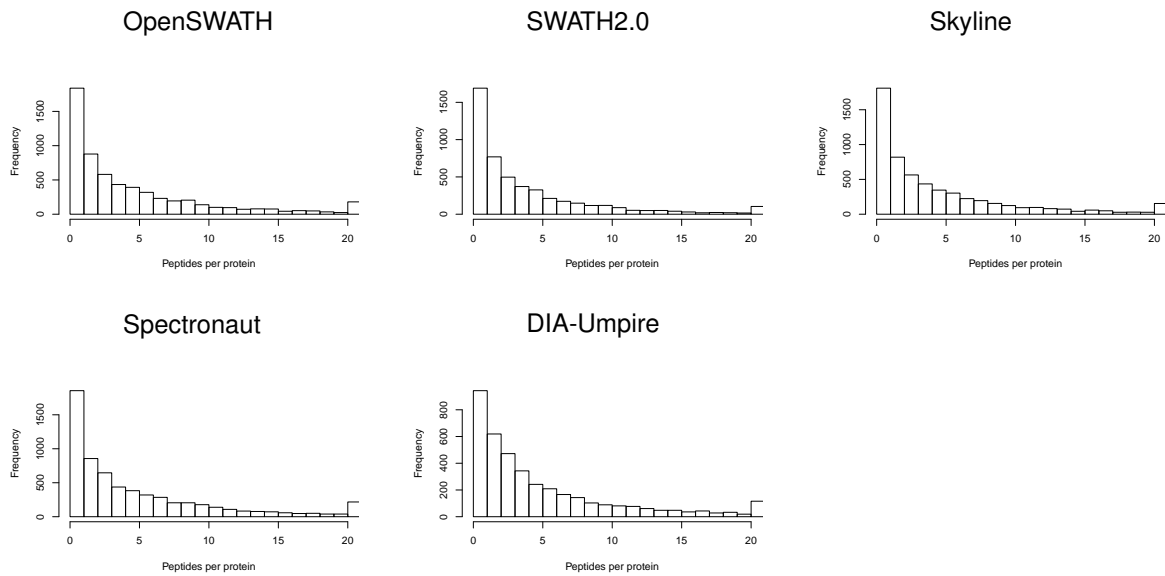

**Supplementary Figure 19.C:** Number of quantified peptides per protein for HYE 124, TripleTOF 6600, 32fix setup, iteration 1.

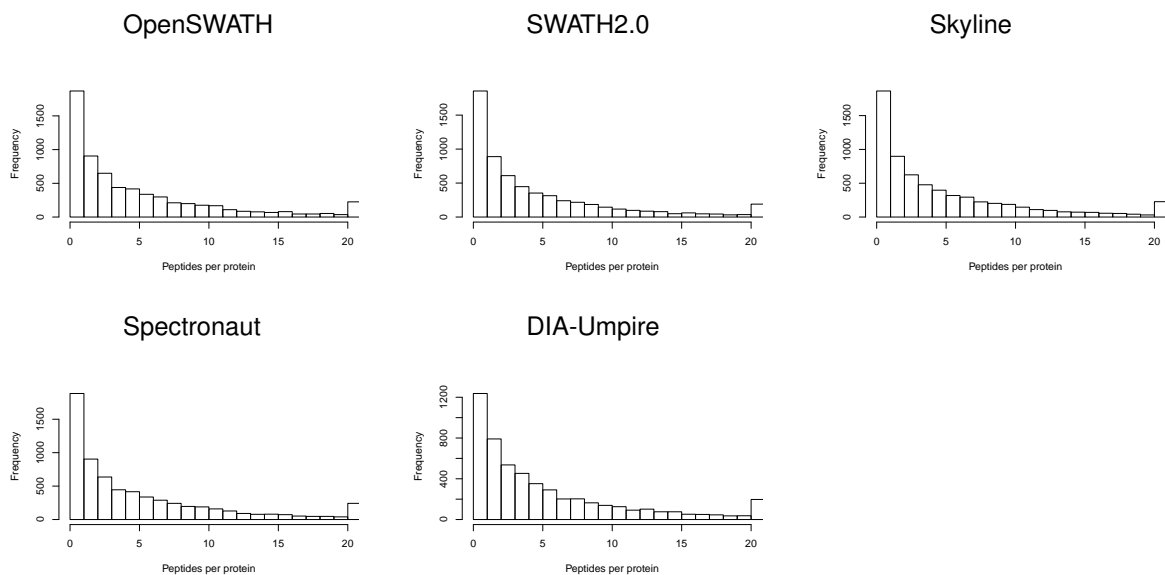

**Supplementary Figure 19.D:** Number of quantified peptides per protein for HYE 124, TripleTOF 6600, 64var setup, iteration 1.

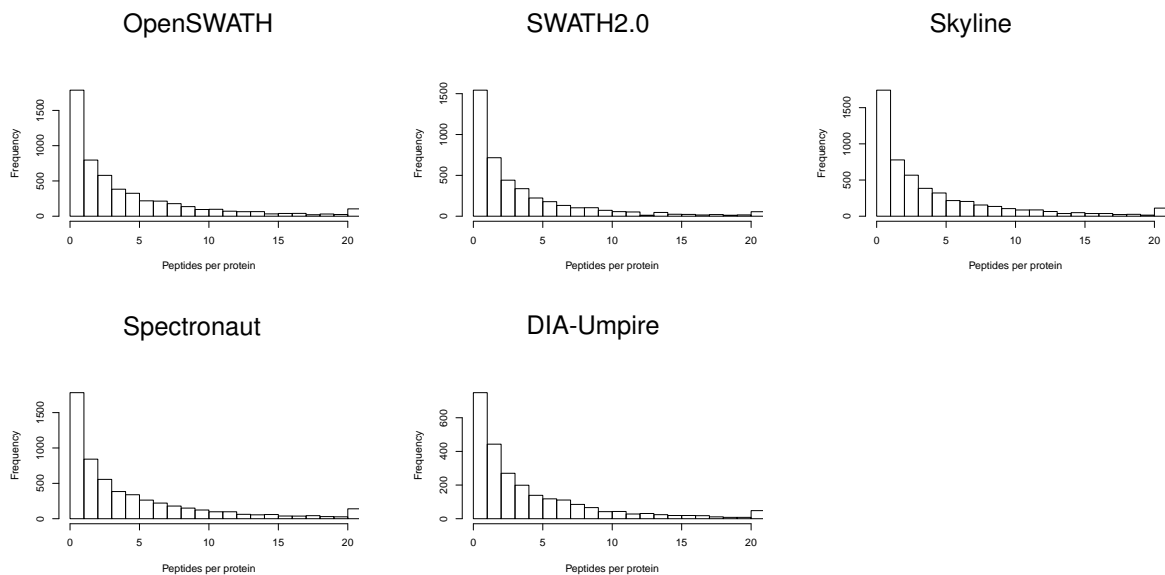

**Supplementary Figure 19.E:** Number of quantified peptides per protein for HYE 124, TripleTOF 5600, 32fix setup, iteration 1.

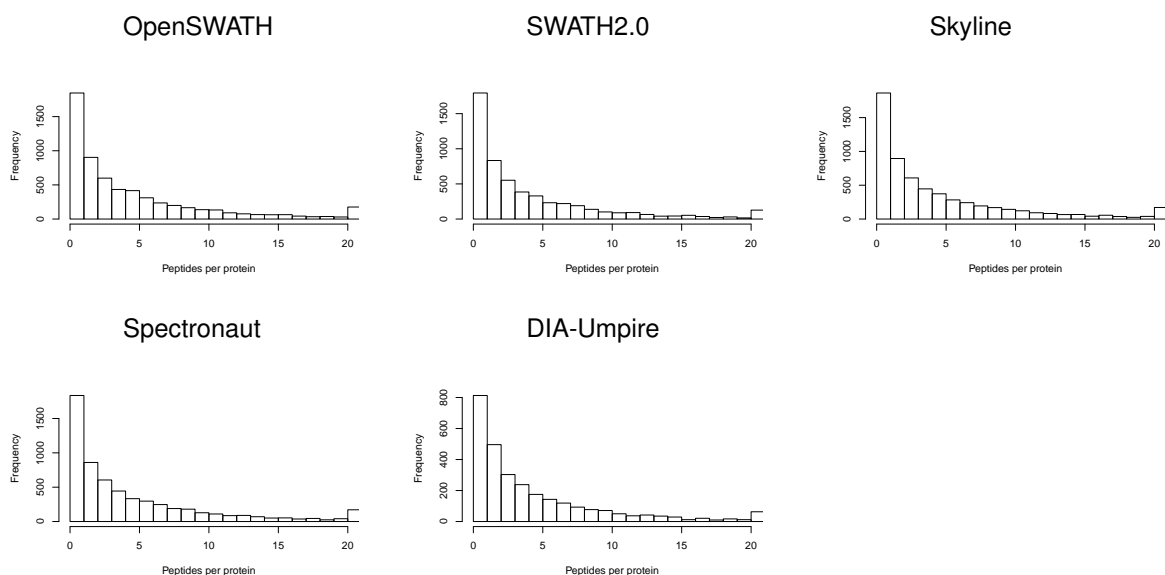

**Supplementary Figure 19.F:** Number of quantified peptides per protein for HYE 124, TripleTOF 5600, 64var setup, iteration 1.

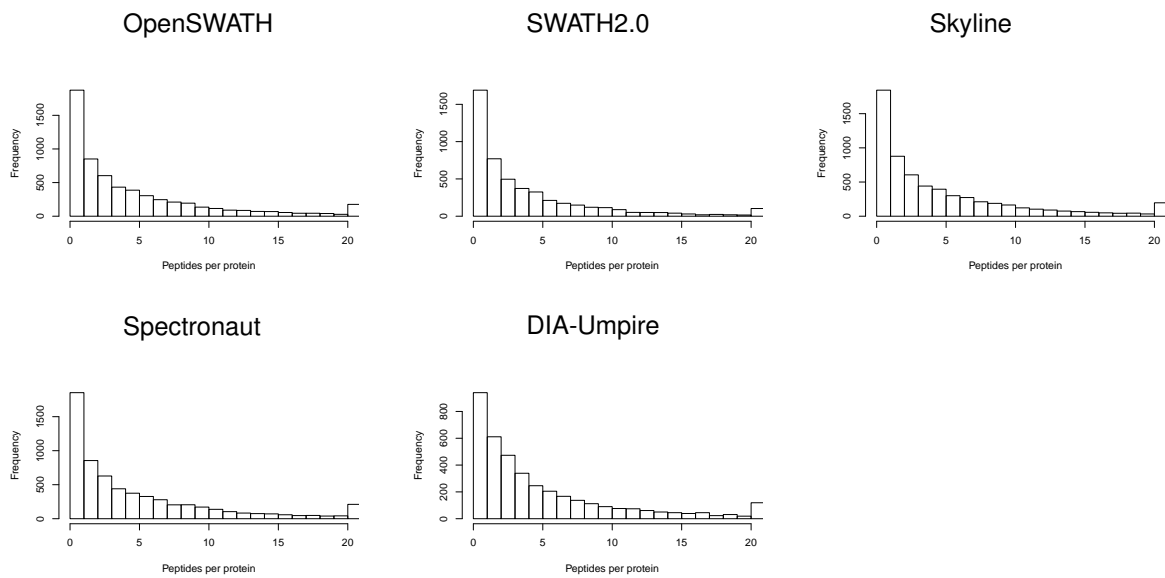

**Supplementary Figure 19.G:** Number of quantified peptides per protein for HYE 124, TripleTOF 6600, 32fix setup, iteration 1.

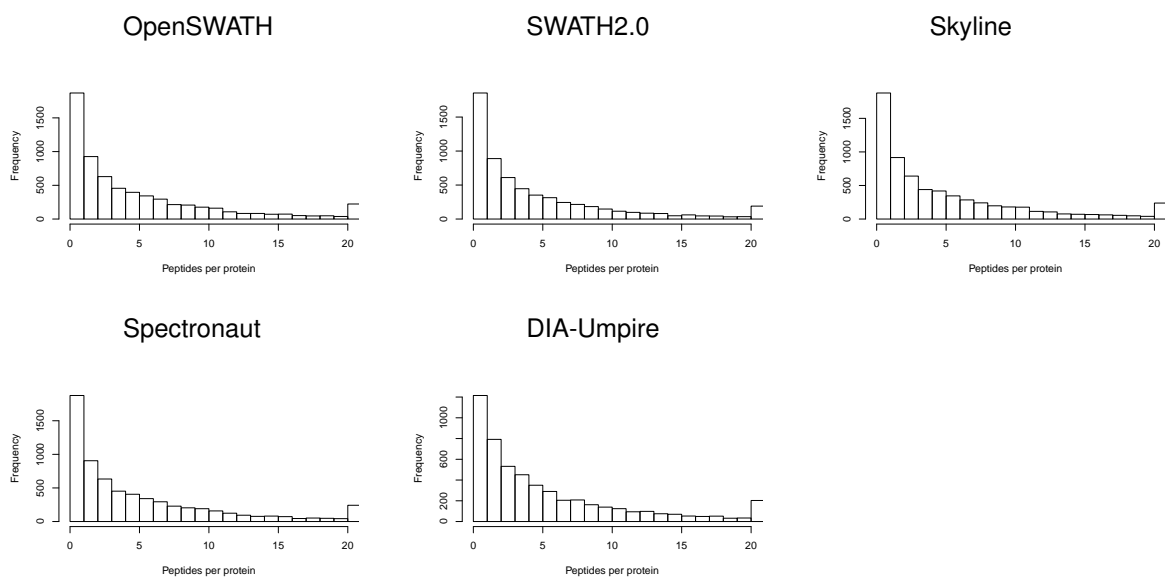

**Supplementary Figure 19.H:** Number of quantified peptides per protein for HYE 124, TripleTOF 6600, 64var setup, iteration 1.

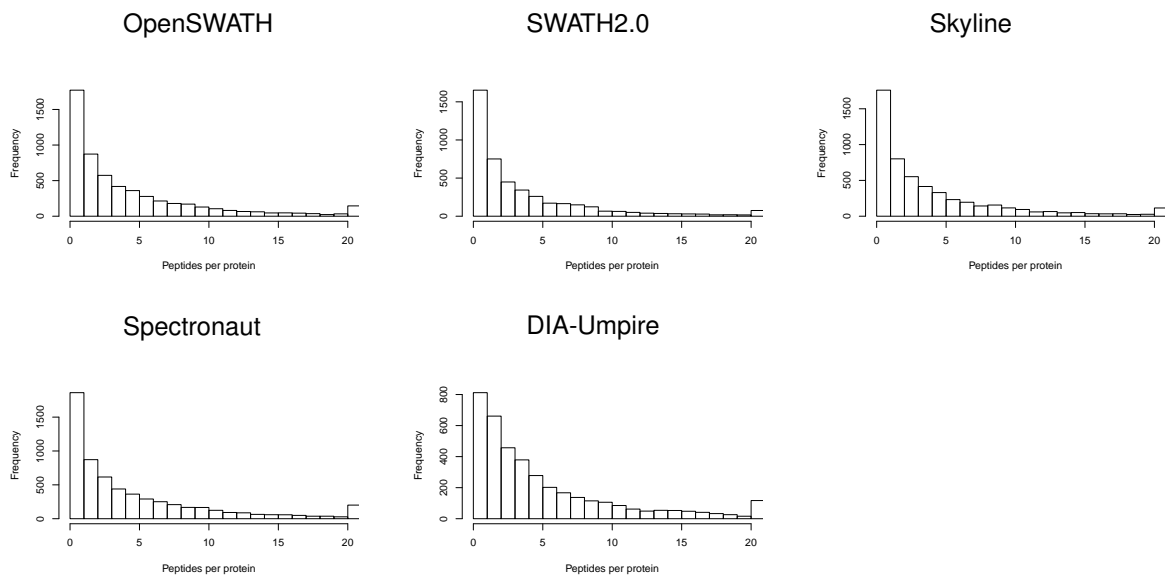

**Supplementary Figure 19.I:** Number of quantified peptides per protein for HYE 110, TripleTOF 6600, 32fix setup.

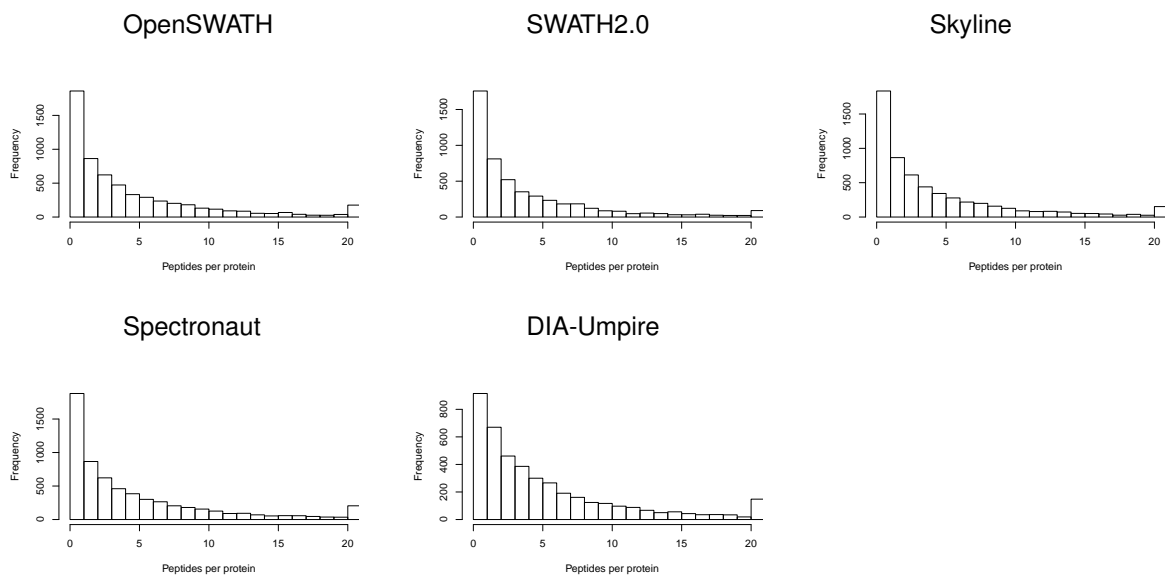

**Supplementary Figure 19.J:** Number of quantified peptides per protein for HYE 110, TripleTOF 6600, 32var setup.

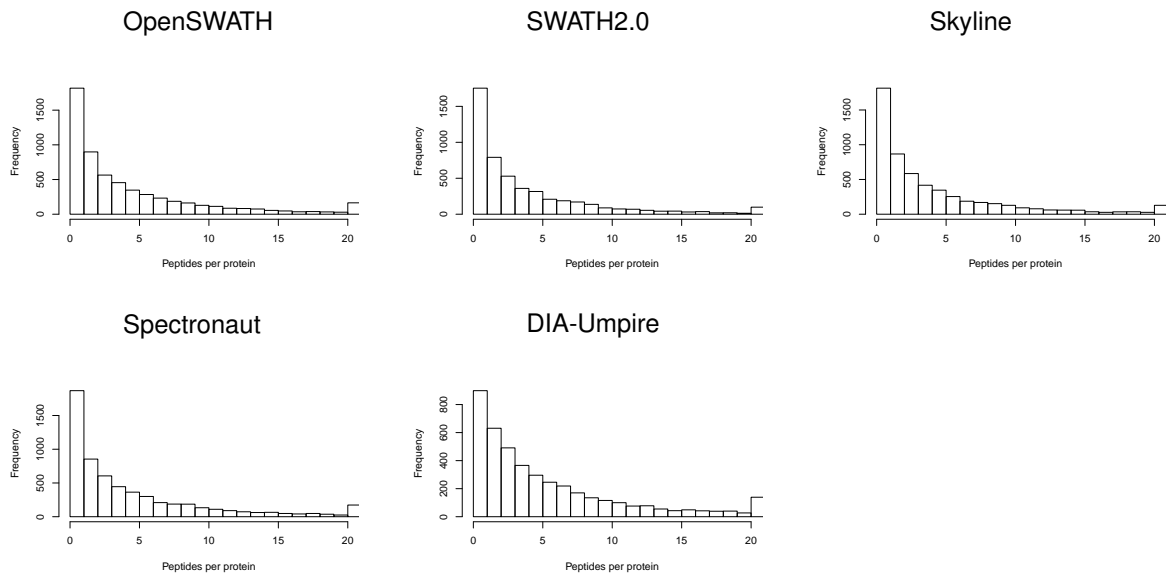

**Supplementary Figure 19.K:** Number of quantified peptides per protein for HYE 110, TripleTOF 6600, 64fix setup.

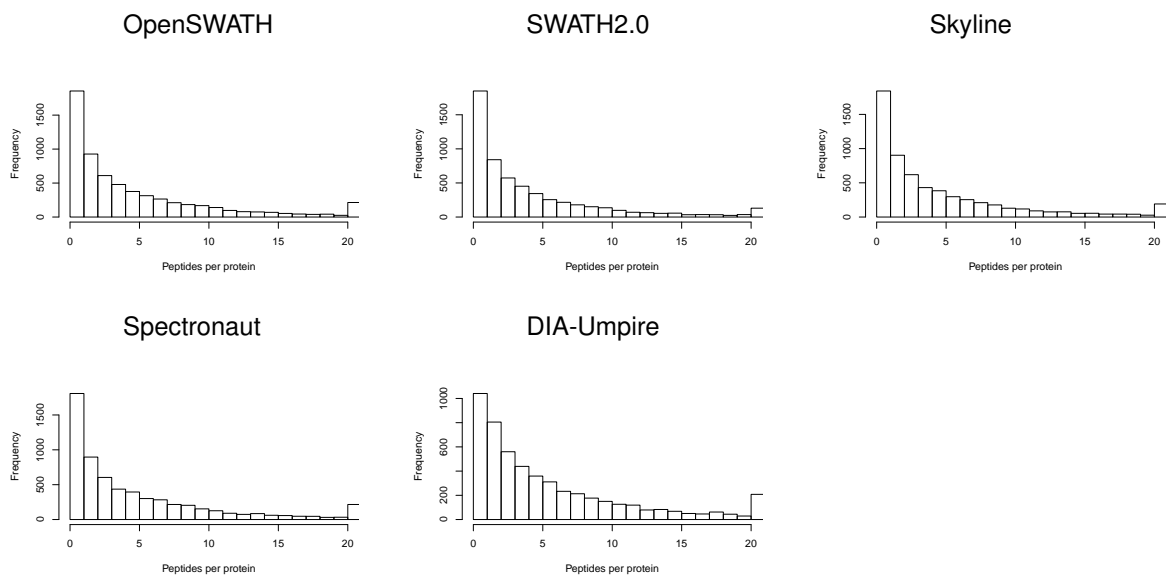

**Supplementary Figure 19.L:** Number of quantified peptides per protein for HYE 110, TripleTOF 6600, 64var setup.

**Supplementary Figure 20. Peptide overlap between the five software tools using a dedicated library with peptides identified initially only by DIA-Umpire.**

A dedicated library (built with Orbitrap/Fusion assays) containing peptides exclusively detected by DIA-Umpire was interrogated using the four library-based software tools. Only unmodified peptides were considered to estimate the overlap with DIA-Umpire's exclusively identified peptides.

Notably, more than 99% of the 6,826 peptides in this library were detectable by at least two library-based tools.

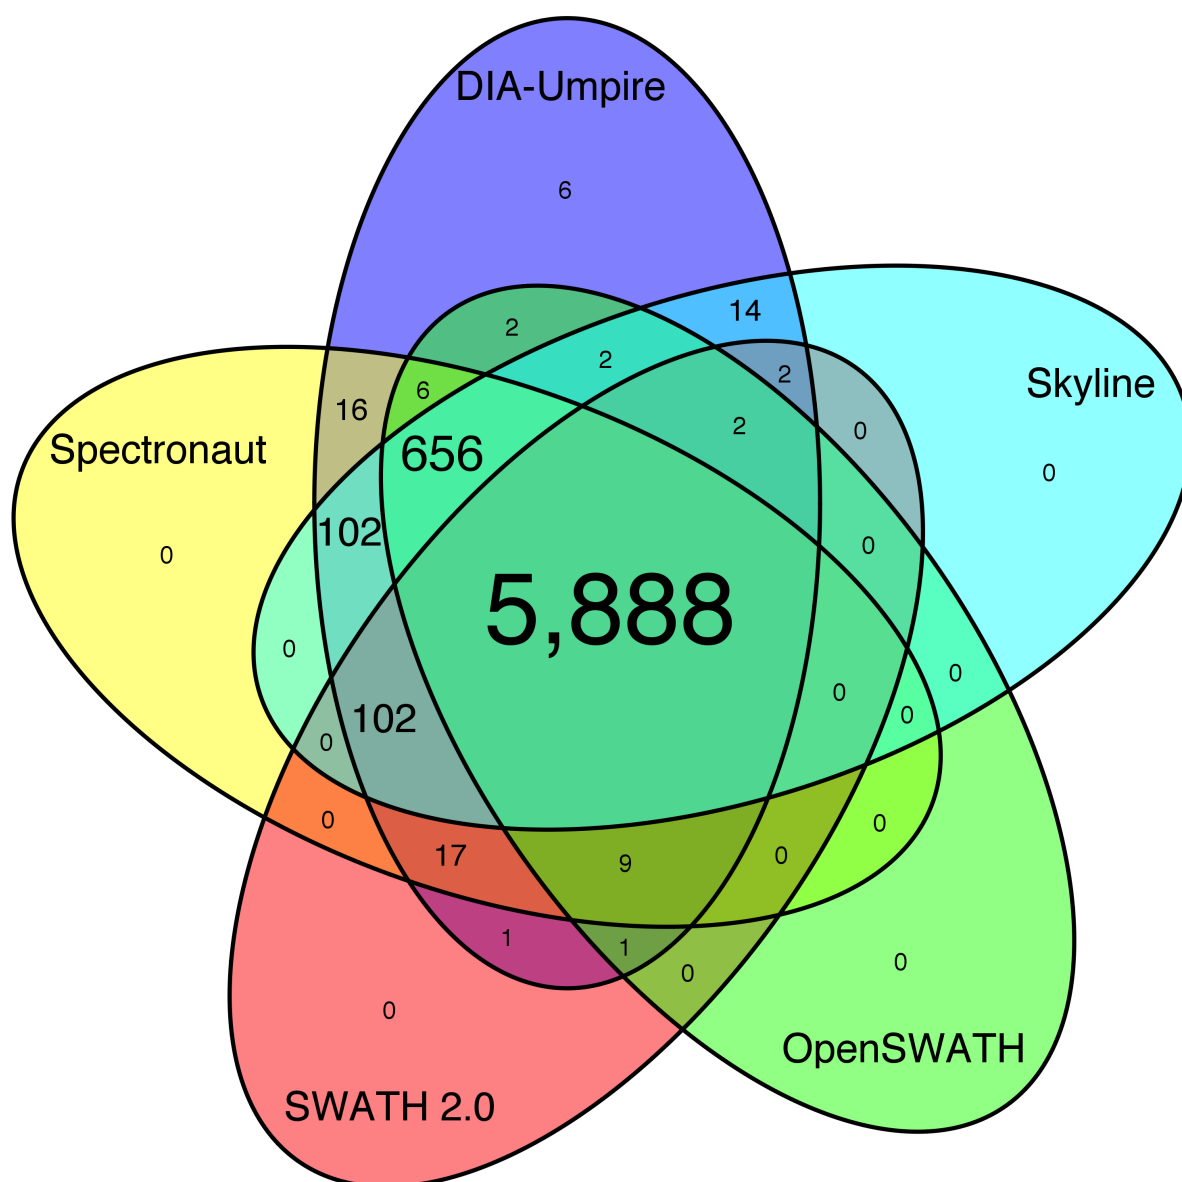

**Supplementary Figure 20:** Peptide overlap between the five software tools using a dedicated library with peptides identified initially only by DIA-Umpire.

## **Supplementary Figure 21. Retention time differences and correlation of reported peak intensities between all software tools for extractions of a dedicated library with peptides identified only by DIA-Umpire.**

The present figure shows the retention time differences (upper right panels) and correlation of reported peak intensities (lower left panels) between all software tools for extractions of a dedicated library with peptides identified only by DIA-Umpire. A dedicated library (built with Orbitrap/Fusion assays) containing peptides exclusively detected by DIA-Umpire was interrogated by using the four library-based software tools. Only unmodified peptides were considered to compare the peak retention times and intensities of all five software tools.

Retention time differences (upper right panels) and correlation of reported peak intensities (lower left panels) between all software tools for the respective matching precursors. Outliers are plotted in the color of the outlier software tool (see color legend in the diagonal panels). Diagonal panels show the total number and percentage (to the total number of common detected peptides) of outliers of each respective software tool. Outliers have been defined as producing a standard deviation of the peak retention time greater than 0.2 minutes relative to all other software tools detecting that precursor, after removing ambiguous cases, in which more than one software tool produce a greater standard deviation in the peak retention time.



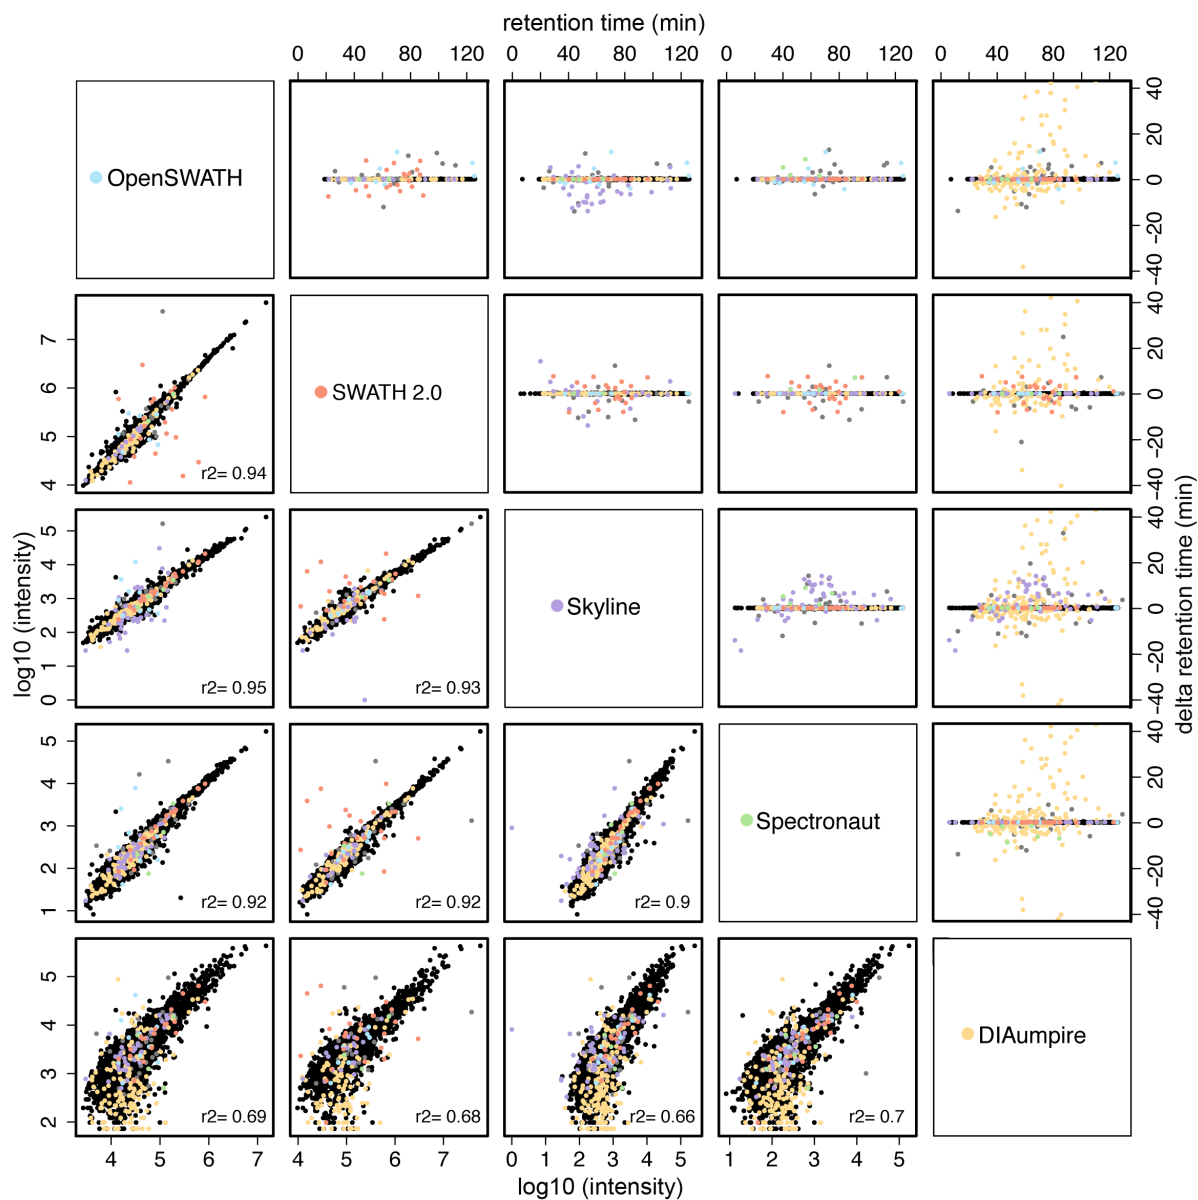

**Supplementary Figure 21:** Retention time differences (upper right panels) and correlation of reported peak intensities (lower left panels) between all software tools for extractions of a dedicated library with peptides identified only by DIA-Umpire.

## Supplementary Figure 22. Overlap of quantified peptides between DIA-Umpire and the library based tools.

The present figure shows the overlap of quantified peptides between DIA-Umpire and the library based tools in the lowest (A) middle (B) and highest (C) intensity tertiles. Peptide identifications were grouped in tertiles of total signal intensities (average of the intensities detected by all software tools for each peptide). The first tertile (lowest intensities) is the most dissimilar group and shows that both library-based tools and DIA-Umpire identify different peptides at the lower intensity range. The second and third tertiles show increasingly better agreement between DIA-Umpire and library-based software tools.

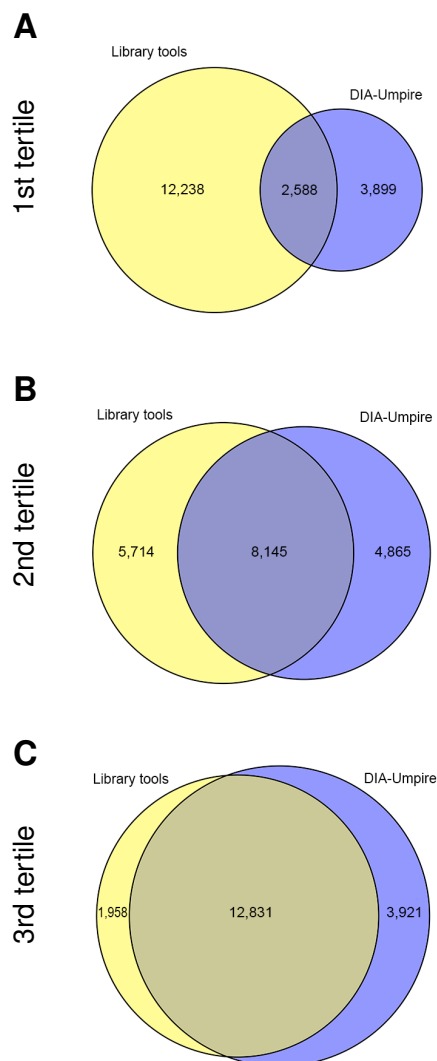

**Supplementary Figure 22:** Overlap of quantified peptides between DIA-Umpire and the library based tools in the lowest (A) middle (B) and highest (C) intensity tertile.

## Supplementary Figure 23. LFQbench peptide and protein level benchmarks using Skyline's user recommended values.

Skyline's web page suggests to users a configuration parameter setting, which has also been evaluated in this study (LFQbench results shown in this figure), and afterwards optimized for the iteration 1.

Log-transformed ratios ( $\log_2(A/B)$ ) of proteins were plotted for each benchmarked software tool over the log-transformed scaled intensity of sample B. Dashed colored lines represent the expected  $\log_2(A/B)$  values for human, yeast, and E.coli peptides. Black dashed lines represent the local trend along the x-axis of experimental log-transformed ratios of each population (human, yeast, and E.coli). In case of sample HYE124, panel A shows both iterations for all software tools, and panel B shows the  $\log_2(A/B)$  of the averages between technical replicates of A and B for E.coli peptides in the lowest intensity tertile. Boxes represent 25% and 75% percentiles, whiskers cover data points between 1% and 99% percentiles.

Intensities of multiply charged precursors were summed up, and averaged between technical replicates of each sample. Protein quantities were estimated in each technical replicate by the average of the most 3 intense peptides reported for each protein. Single hit proteins (a single peptide detected in a protein) and proteins detected in less than two injections in both samples A and B were discarded.

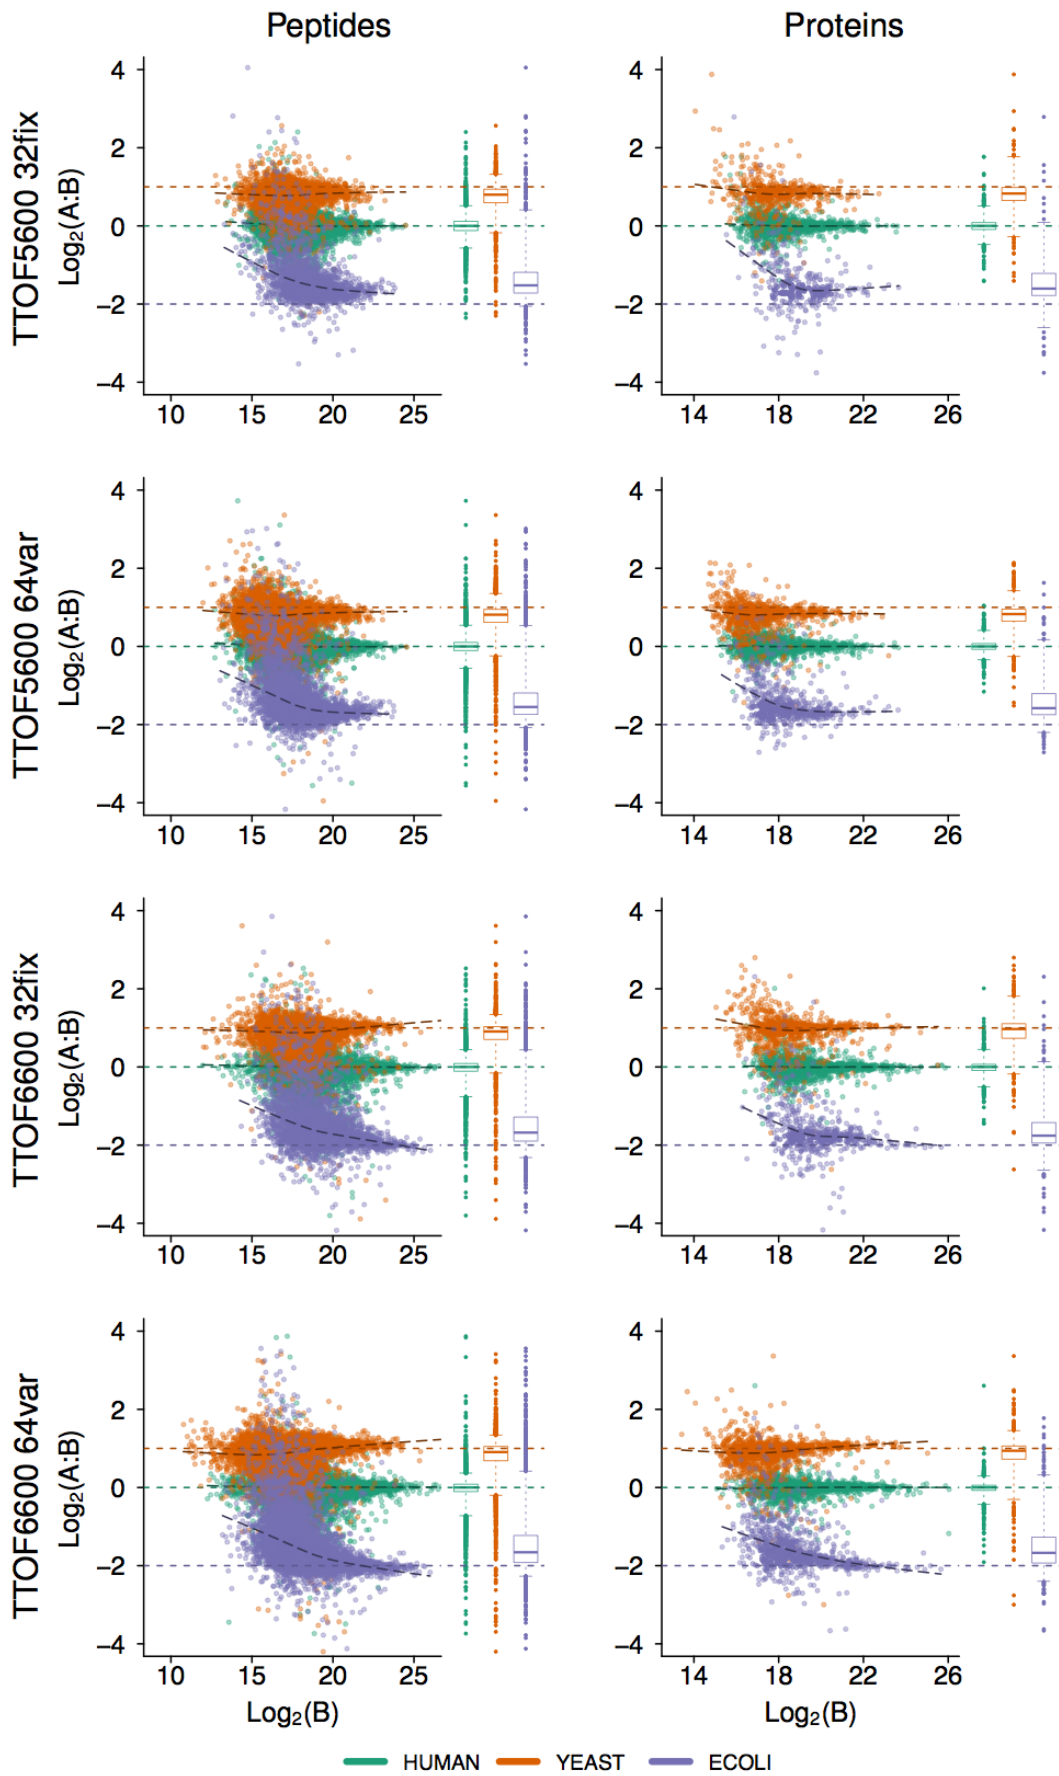

**Supplementary Figure 23:** LFQbench peptide and protein level benchmarks using Skyline’s user recommended values.

## Supplementary Figure 24. Isolation ranges used in Skyline.

Isolation ranges used in Skyline (shaded in blue) shown over the extracted ion chromatogram of the  $y_6$  ( $z = 1$ ) fragment ion of the peptide GTFIIDPAAVIR (chosen as an example).

The following pages show:

- Supplementary Figure 24.A: HYE 124, TripleTOF 5600, 32fix setup
- Supplementary Figure 24.B: HYE 124, TripleTOF 5600, 64var setup
- Supplementary Figure 24.C: HYE 124, TripleTOF 6600, 32fix setup
- Supplementary Figure 24.D: HYE 124, TripleTOF 6600, 64var setup

## TTOF 5600 32-windows

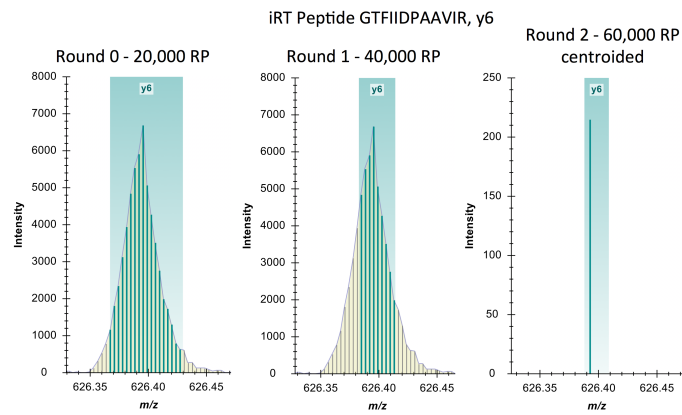

**Supplementary Figure 24.A:** Isolation ranges used in Skyline for HYE 124, TripleTOF 5600, 32fix setup.

## TTOF 5600 64-windows

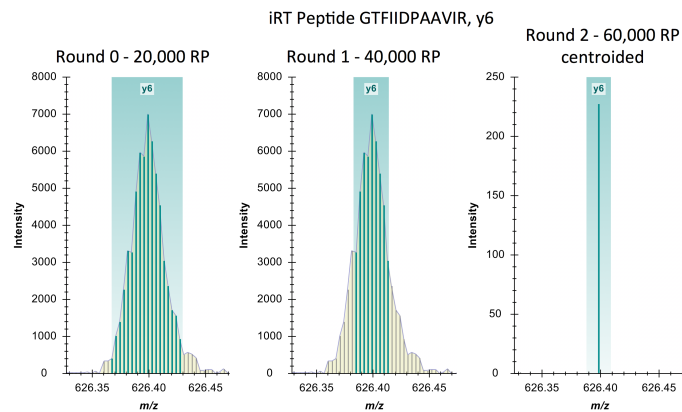

**Supplementary Figure 24.B:** Isolation ranges used in Skyline for HYE 124, TripleTOF 5600, 64var setup.

## TTOF 6600 32-windows

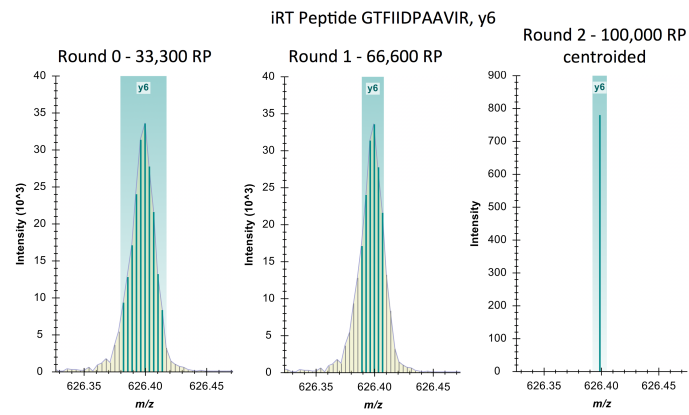

**Supplementary Figure 24.C:** Isolation ranges used in Skyline for HYE 124, TripleTOF 6600, 32fix setup.

## TTOF 6600 64-windows

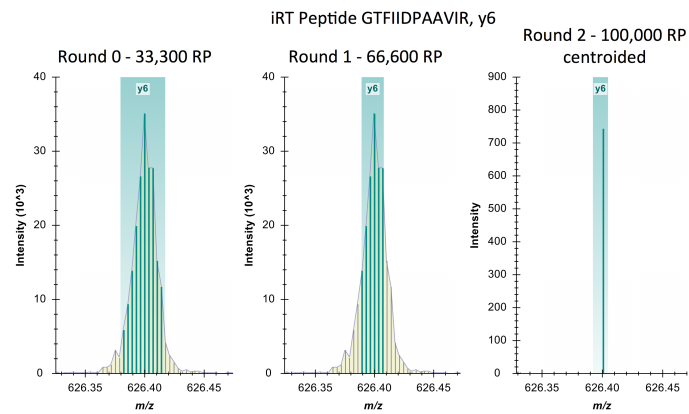

**Supplementary Figure 24.D:** Isolation ranges used in Skyline for HYE 124, TripleTOF 6600, 64var setup.

## Supplementary Figure 25. Linear models of intensity scales (CIS).

Intensity values reported by each software tool were scaled to an intensity reference (SWATH 2.0 reports were used as reference). For each software tool peptide report, precursor intensities were paired with precursor intensities of the reference, and the 98th lowest percentile of the paired intensities was used to calculate a linear model (origin was set to 0) to estimate the intensity factor scale. This factor scale was then used to scale both peptide and protein reports of each evaluated software tool.

The following pages show linear models of intensity scales for:

- Supplementary Figure 25.A: HYE 124, TripleTOF 5600, 32fix setup
- Supplementary Figure 25.B: HYE 124, TripleTOF 5600, 64var setup
- Supplementary Figure 25.C: HYE 124, TripleTOF 6600, 32fix setup
- Supplementary Figure 25.D: HYE 124, TripleTOF 6600, 64var setup
- Supplementary Figure 25.E: HYE 110, TripleTOF 6600, 32fix setup
- Supplementary Figure 25.F: HYE 110, TripleTOF 6600, 32var setup
- Supplementary Figure 25.G: HYE 110, TripleTOF 6600, 64fix setup
- Supplementary Figure 25.H: HYE 110, TripleTOF 6600, 64var setup



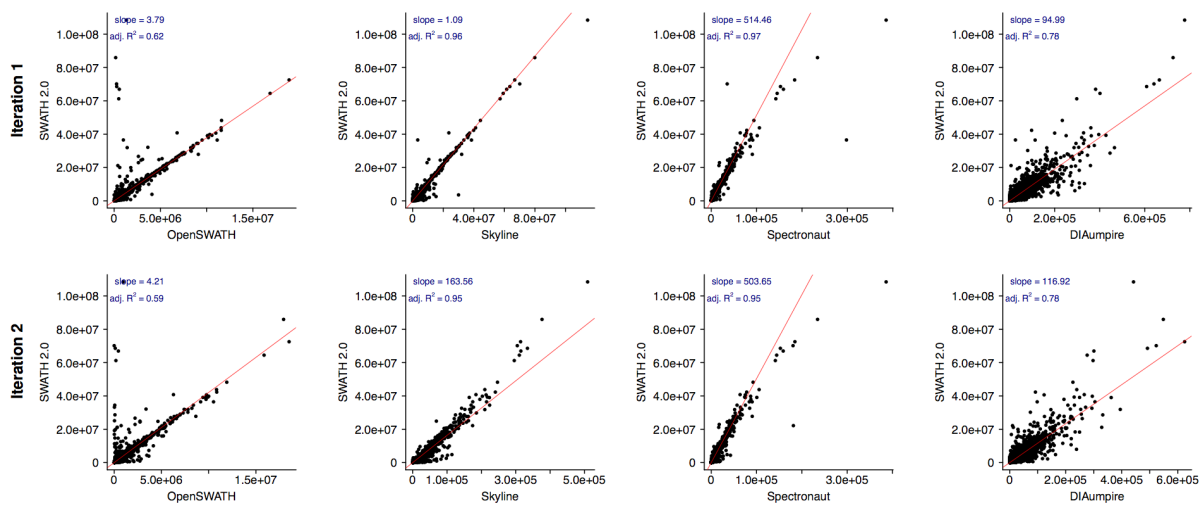

**Supplementary Figure 25.A:** Linear models of intensity scales for HYE 124, TripleTOF 5600, 32fix setup.

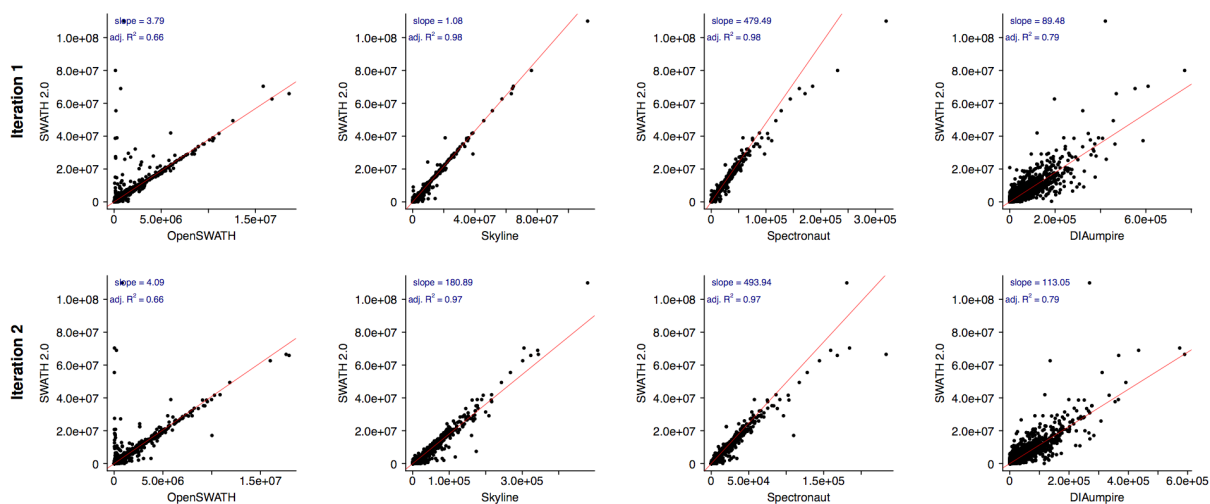

**Supplementary Figure 25.B:** Linear models of intensity scales for HYE 124, TripleTOF 5600, 64var setup.

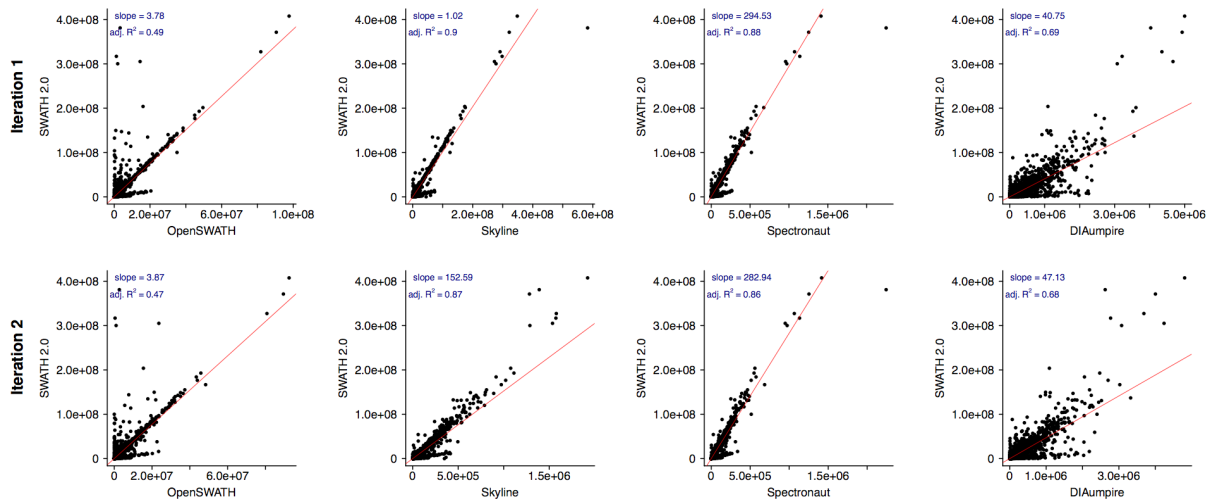

**Supplementary Figure 25.C:** Linear models of intensity scales for HYE 124, TripleTOF 6600, 32fix setup.

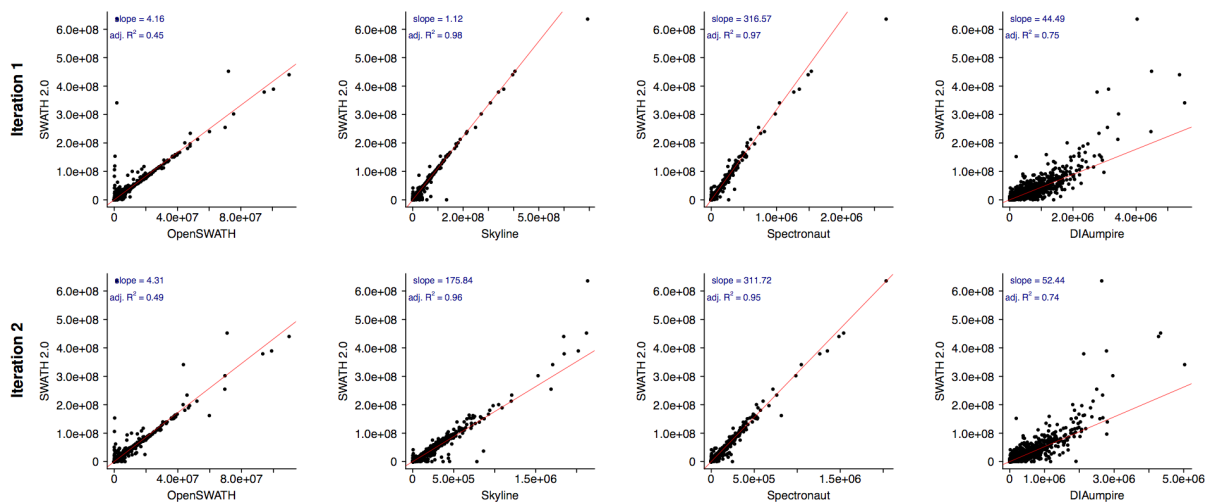

**Supplementary Figure 25.D:** Linear models of intensity scales for HYE 124, TripleTOF 6600, 64var setup.

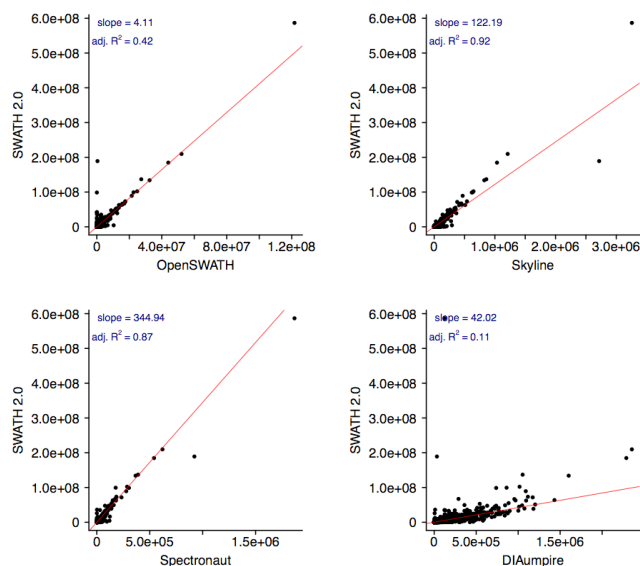

**Supplementary Figure 25.E:** Linear models of intensity scales for HYE 110, TripleTOF 6600, 32fix setup.

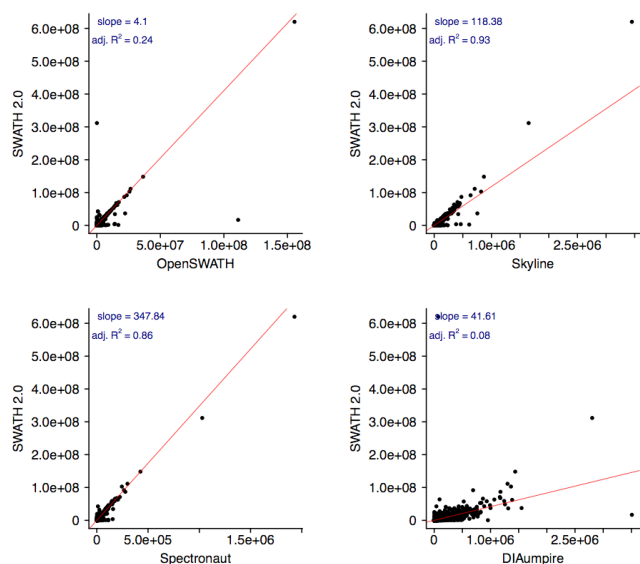

**Supplementary Figure 25.F:** Linear models of intensity scales for HYE 110, TripleTOF 6600, 32var setup.

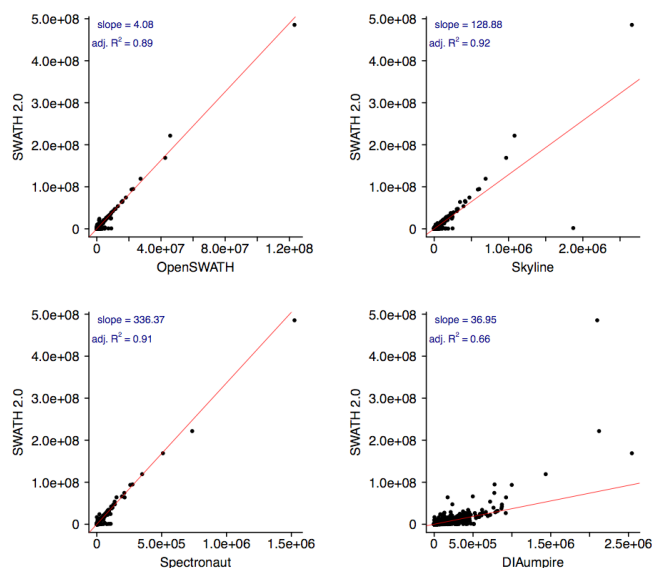

**Supplementary Figure 25.G:** Linear models of intensity scales for HYE 110, TripleTOF 6600, 64fix setup.

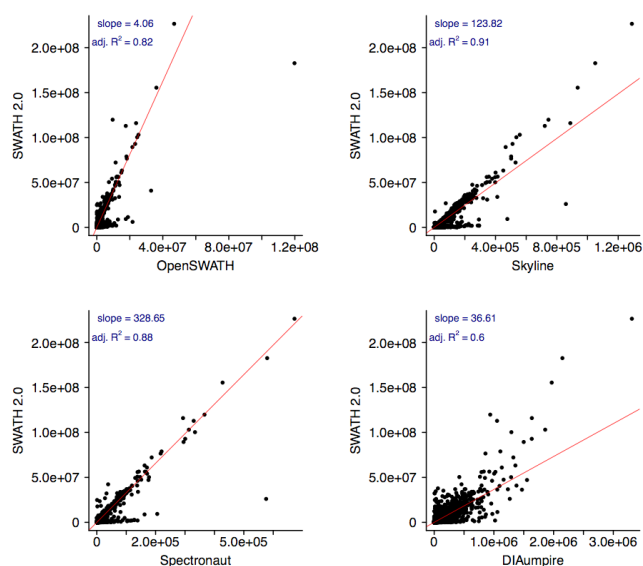

**Supplementary Figure 25.H:** Linear models of intensity scales for HYE 110, TripleTOF 6600, 64var setup.

# Step-by-Step Analyses

## 1. OpenSWATH

This step-by-step describes how to analyse a dataset of SWATH files with OpenSWATH. It exemplarises how to process one dataset containing 6 files with generic names (filename\_001, filename\_002, ..., filename\_006). For a more detailed information about the different parameters of OpenSWATH, the user may be interested on reading an article posted in bioRxiv: <http://dx.doi.org/10.1101/044552>

### 1.1 Convert the provided csv file to TraML format for OpenSWATH

```
ConvertTSVToTraML \  
  -in ecolihumanyeast_concat_mayu_IRR_cons_openswath_32sw-var_curated.csv \  
  -out ecolihumanyeast_concat_mayu_IRR_cons_openswath_32sw-var_curated.TraML
```

### 1.2 Append decoy assays to the TraML file for OpenSWATH

```
OpenSwathDecoyGenerator \  
  -in ecolihumanyeast_concat_mayu_IRR_cons_openswath_32sw-var_curated.TraML \  
  -out ecolihumanyeast_concat_mayu_IRR_cons_openswath_32sw-var_curated_decoy.TraML \  
  -method pseudo-reverse \  
  -append \  
  -exclude_similar
```

### 1.3 Execute OpenSWATH workflow (iRT re-alignment, fragment ion chromatogram extraction, scoring)

```
OpenSwathWorkflow \  
  -in /PATH/filename_001.mzXML.gz \  
  -tr /PATH/ecolihumanyeast_concat_mayu_IRR_cons_openswath_32sw-var_curated_decoy.TraML.csv \  
  -out_tsv /PATH/filename_001.tsv \  
  -tempDirectory /PATH/ \  
  -readOptions cacheWorkingInMemory \  
  -batchSize 1000 \  
  -Scoring:TransitionGroupPicker:background_subtraction original \  
  -Scoring:stop_report_after_feature -1 \  
  -min_upper_edge_dist 1 \  
  -tr_irt /PATH/hroest_DIA_iRT.TraML \  
  -extra_rt_extraction_window 100 \  
  -min_rsq 0.95 \  
  -min_coverage 0.6 \  
  -Scoring:Scores:use_dia_scores true \  
  -rt_extraction_window 600 \  
  -mz_extraction_window 30 \  
  -threads 4 \  
  -ppm
```

(Repeat this step for every file of the dataset – in this example, 6 files)

### 1.4 Prepare the scores to be used for mProphet

```
mProphetScoreSelector.sh \  
  /PATH/filename_001.tsv \  
  xx_swath_prelim_score \  
  bseries_score \  
  intensity_score \  
  isotope_correlation_score \  
  isotope_overlap_score \  
  library_corr \  
  library_rmsd
```

```

log_sn_score \
massdev_score \
massdev_score_weighted \
norm_rt_score \
xcorr_coelution \
xcorr_coelution_weighted \
xcorr_shape \
xcorr_shape_weighted \
yseries_score

```

(Repeat this step for every file of the dataset – in this example, 6 files)

## 1.5 Run the python implementation of mProphet

```

pyprophet \
--ignore.invalid_score_columns \
--target.dir=/PATH/PyProphet/ \
--xeval.num_iter=10 \
--d_score.cutoff=1 \
/PATH/OpenSwathWorkflow/filename_001.tsv

```

(Repeat this step for every file of the dataset – in this example, 6 files)

## 1.6 Run the cross-run alignment procedure

```

feature_alignment.py \
--file_format openswath \
--in \
/PATH/filename_001_with_dscore_filtered.csv \
/PATH/filename_002_with_dscore_filtered.csv \
/PATH/filename_003_with_dscore_filtered.csv \
/PATH/filename_004_with_dscore_filtered.csv \
/PATH/filename_005_with_dscore_filtered.csv \
/PATH/filename_006_with_dscore_filtered.csv \
--out /PATH/feature_alignment.tsv \
--out_meta /PATH/feature_alignment.yaml \
--tmpdir /PATH.tmpdir/ \
--mst:useRTCORrection False \
--method global_best_overall \
--max_rt_diff auto_3medianstdev \
--frac_selected 0 \
--target_fdr 0.01 \
--realign_method lowess_cython \
--disable_isotopic_grouping

```

## 2. SWATH 2.0

This step-by-step manual describes how to analyse SWATH-MS data with the SWATH 2.0 micro-app integrated in the software PeakView. SWATH 2.0 supports several input format files for the libraries; this step-by-step describes only the workflow used in this manuscript.

### 2.1 Library preparation

- Prepare an ion library in a plain text file, formatted as tab separated values. Each ion fragment of the library must be reported in a different row.

The following column values are necessary:

| Column name           | value                                                                                        |
|-----------------------|----------------------------------------------------------------------------------------------|
| Q1                    | Precursor m/z                                                                                |
| Q3                    | Fragment m/z                                                                                 |
| RT_detected           | retention time in which peptide was detected in library generation                           |
| protein_name          | any protein identificator                                                                    |
| isotype               | light or heavy (may be left in blank)                                                        |
| relative_intensity    | normalized intensity of the fragment                                                         |
| stripped_sequence     | peptide sequence without modifications                                                       |
| modification_sequence | peptide sequence including modifications in ProteinPilot format.                             |
| prec_z                | charge state of the precursor ion                                                            |
| frg_type              | fragment ion type (y, b, ...)                                                                |
| frg_z                 | charge state of the fragment ion                                                             |
| frg_nr                | number of amino acids of the fragment ion sequence                                           |
| iRT                   | iRT values                                                                                   |
| uniprot_id            | UniProt ID                                                                                   |
| decoy                 | is decoy? TRUE/FALSE                                                                         |
| N                     | peptide ranking. Set all to 1                                                                |
| shared                | Peptides shared in several proteins. Set to FALSE to use all peptides (LFQbench filter them) |

- Retention time calibration peptides must be labeled as [ RT-Cal protein ] at the *protein\_name*

### 2.2 Analysis in SWATH 2.0 micro-app

- Open the program *PeakView*.
- Choose: Quantitation -> SWATH Processing -> Import Ion Library
  - Browse for the ion library (remember to select at the bottom the filter for *\_Ion Library Text Files (\*.txt)\_*)
  - *Import settings*: untick the option *Do not import shared peptides*. For label-free quantification, leave *Sample Type* as *Unlabeled*.
  - *Select Samples*: choose the directory containing .wiff files at the *Source*



\* You can drag and drop the samples you want to analyse from the *Available* frame to the *Selected* frame. You may also drag and drop file folders.

- At the main panel, there are four sub-panels, from top to bottom and from left to right: Proteins in library, Peptides in protein, composed extracted ion chromatograms of the fragment ions of the selected peptide, composed MS2 scan of the best peak selected by the algorithm (top, in blue), and relative intensity and m/z of the library fragment ions of the selected peptide.
- Click on *Processing Settings* at the top of the *Proteins in library* panel. Use the following parameters:
- Peptide filter

| Parameter                                | value    |
|------------------------------------------|----------|
| Number of Peptides per Protein           | 2000     |
| Number of Transitions per Peptide        | 6        |
| Peptide Confidence Threshold % (0-99)    | 99       |
| False Discovery Rate Threshold % (0-100) | 1.0      |
| Exclude Modified Peptides                | unticked |
| Exclude Shared Peptides                  | unticked |
| Fix Rank                                 | unticked |

- XIC Options

| Parameter                   | value                                        |
|-----------------------------|----------------------------------------------|
| XIC Extraction Window (min) | 10.0                                         |
| XIC width (ppm)             | 50 for TripleTOF 5600, 30 for TripleTOF 6600 |
| XIC width (Da)              | unticked                                     |

- Once you have configured processing settings, click the *Process* button at the right side of the *Processing Settings* button.
  - choose a name for saving the SWATH 2.0 session at the displayed dialog.
- **Report results:** when SWATH 2.0 finishes to process, export results by choosing at the main menu: Quantitation -> Export -> All
  - choose a name for saving the report at the displayed dialog.

### 3. Skyline

There are many Skyline tutorials available at the Skyline’s tutorial web page. This short step-by-step tutorial deals exclusively with the kind of DIA (SWATH-MS) analysis performed in this article, and it exemplarises how to analyse with Skyline a dataset acquired in a TripleTOF 6600 with the settings proposed for the second iteration.

The whole analysis is summarised in 9 steps:

1. Create a new blank document
2. Import transitions list
  - File → Import → Transition List... (select Skyline designed transition list: both openswath and peakview formats work fine)
3. Configure settings
  - Settings are described at the Supplementary Information Table 6. For convenience, they are also described at the end of this document.
4. Add decoys
  - Edit → Refine → Add Decoy peptides... → Decoy generation method: Reverse sequence
5. Integrate All (for quantification)
  - Settings → Integrate All
6. Remove precursors with less than 3 transitions
  - Edit → Refine → Advanced → Min transitions per precursor: 3
7. Import wiff files into the Skyline document: File → Import → Results... → Add single-injection replicates in files (Optimizing: None)
  - After selecting wiff files: do not remove common prefix.
8. Use mProphet model
  - Edit → Refine → Reintegrate (here: train the model and use all enabled features). Apply to all precursors, and tick the “report Q-value” and “Overwrite manual integration” options.
9. Save a report file
  - File → Export → Report... (use the designed report: SWATHbenchmark\_long.skr)

#### 3.1 Settings

##### Document Settings

- check “annotation\_QValue”

##### Transition Settings

##### Full-Scan

##### MS1 filtering

- Isotope peaks included: None

## MS/MS filtering

- Acquisition method: DIA
- Product mass analyzer: TOF
- Resolving power: 100,000
- Isolation scheme:
  - manually designed: use the mass ranges defined in Supplementary Table 8.

## Retention time filtering

- Use only scans within “10” minutes of predicted RT.

## Instrument

- min  $m/z$  : 50  $m/z$
- max  $m/z$  : 2000  $m/z$
- Method match tolerance  $m/z$ : 0.01  $m/z$
- Other parameters: left in blank or not ticked

## Library

- Ion match tolerance: 0.1  $m/z$
- If a library spectrum is available, pick its most intense ions
- Pick: 6 product ions
  - from filtered ion charges and types

## Filter

- Precursor charges: 2, 3
- Ion charges: 1, 2
- Ion types: y, b
- Product ions: from ion “3” to “last ion -1”
  - Special ions: none checked
  - Use DIA precursor window for exclusion: checked
- Auto-select all matching transitions: checked

## Prediction

These parameters are less important in our case, since we are not doing using any transition prediction (we use a DDA library).

- Precursor mass: Monoisotopic
- Product ion mass: Monoisotopic
- Collision energy: ABI 5500 QTrap
- Declustering potential: None

- Optimization library: None

## Peptide Settings

### Digestion

- Enzyme: Trypsin [KR|P]
- Max missed cleavages: 0
- Background proteome: None

### Prediction

- Retention time predictor:
  - Use the following standard peptides and iRT values:

| Modified Sequence | iRT Value |
|-------------------|-----------|
| ADVTPADFSEWSK     | 54.97     |
| DGLDAASYYPVVR     | 43.28     |
| GAGSSEPVTGLDAK    | 0.23      |
| GTFIIDPAAVIR      | 86.72     |
| GTFIIDPGGVIR      | 71.38     |
| LFLQFGAQQSPFLK    | 98.09     |
| LGGNEQVTR         | -28.31    |
| TPVISGGPYEYR      | 29.00     |
| TPVITGAPYEYR      | 33.63     |
| VEATFGVDESNK      | 13.11     |
| YILAGVENS         | 22.38     |

- Measured peptides:
  - Add... -> A named spectral library : (select the spectral library you have previously generated)
- Time window: 3 min
- Drift time predictor: None

### Filter

- Min length: 7
- Max length: 36
- Exclude N-terminal AAs: 36
- Auto-select all matching peptides: checked

### Library

- built from corresponding file

- Pick peptides matching: Library

## Modifications

- Structural modifications:
  - Carbamidomethyl (C) *Fixed*
  - Oxidation (M) *Variable*
- Max variable mods: 3
- Max neutral losses: 1
- Isotope label type: heavy
- Isotope modifications:
  - Label:  $^{13}\text{C}(6)^{15}\text{N}(2)$ (C-term K)
  - Label:  $^{13}\text{C}(6)^{15}\text{N}(4)$ (C-term R)
- Internal standard type: heavy

## 4. Spectronaut

A complete manual of Spectronaut is available on-line at the Bignosys web page:.

This step-by-step manual is focused exclusively on how to analyse SWATH-MS data with Spectronaut when you have already a library (in text format), and how to get a report for Lfqbench.

### 4.1 Convert .wiff files to Spectronaut's raw format (.htrms)

Spectronaut can read .wiff files directly, but in order to reduce the analysis time, they may be converted to a Spectronaut's internal format (.htrms). This is strongly recommended if you need to perform several analyses over the same dataset.

1. Organise all .wiff files you want to convert into a single folder (Example: \wiff\_files).
2. Start the program “*Wiff to HTRMS Converter*”.
3. Select the tab *Auto Conversion*.
4. Select as *Input Directory* the folder containing the .wiff files (\wiff\_files).
5. Select as *Output Directory* any folder of your choice (Example: \htrms\_files).
6. Press the button at the bottom right corner: *Convert*

### 4.2 Analysis in Spectronaut

Once all .wiff files are converted to .htrms, you can start the analysis in Spectronaut.

1. Start the main program “*Spectronaut*”.
2. Select the tab: *Review*.
3. Press the link: *Load Raw Data...*
  - Select the folder containing the .htrms files (\htrms\_files), and choose all files you want to analyse.
  - If Spectronaut detects a common prefix at the file names, it will display an option to remove this prefix. Do not remove the prefix if you want to analyse files with Lfqbench (otherwise you need to take note of the new file names).
  - Write an Experiment name (Example: Spectronaut\_HYE124\_TTOF6600\_64var).

### Configure the spectral library

- Select the tab *From File*
  - Browse your spectral library. You may use any spectral library formatted in plain text. OpenSWATH's and PeakView's (SWATH2.0's) formats work fine.
    - \* If this is the first time you use a spectral library type (i.e. OpenSWATH format), you need to relate column headers to Spectronaut's internal values. Spectronaut has a dictionary for most of these headers, but some of them may be missing. As an example, the following table contains the relationships between OpenSWATH's headers and Spectronaut's internal variables:

| OpenSWATH header | Spectronaut variable |
|------------------|----------------------|
| Q1               | PrecursorMz          |

| OpenSWATH header      | Spectronaut variable                              |
|-----------------------|---------------------------------------------------|
| Q3                    | FragmentMz                                        |
| iRT                   | iRT                                               |
| relative_intensity    | RelativeFragmentIntensity                         |
| stripped_sequence     | StrippedSequence                                  |
| prec_z                | PrecursorCharge                                   |
| frg_type              | FragmentType                                      |
| frg_nr                | FragmentNumber                                    |
| frg_z                 | FragmentCharge                                    |
| protein_name          | ProteinId                                         |
| modification_sequence | ModifiedSequence                                  |
| uniprot_id            | UniProtId                                         |
| isotype               | IsotopicLabel                                     |
| RT_detected           | EmpiricalRT (not used if iRT variable is present) |
| confidence            | blank (not registered)                            |
| decoy                 | blank (not registered)                            |
| N                     | blank (not registered)                            |
| shared                | blank (not registered)                            |

- After relating headers and internal variables, press the bottom right button *Load*.

### Configure Conditions

- At the Experiment Setup: Raw Data, press the button *Configure Conditions...*
  - Write at the *Condition* column a condition name for each file.
    - \* Replicate numbers are automatically assigned for same conditions.
    - \* Labels also change with Conditions.
    - \* Choose a reference condition at the *IsReference* column. Usually, your control condition.
  - Press the button *Apply*.

### Configure Analysis Settings

- At the Experiment setup, you may choose for different analysis schemas. If you didn't save yet any schema in Spectronaut, you have just the default option. You may save a set of parameters as an analysis schema at the *Settings* tab.
  - In this manuscript we use the following parameters for the analysis. You may configure them each time you run Spectronaut, or you may save a schema at the *Settings* tab.
- XIC Extraction:

| Parameter                | Value   |
|--------------------------|---------|
| XIC RT Extraction Window | Dynamic |

- Calibration:

| Parameter                | Value                      |
|--------------------------|----------------------------|
| iRT Calibration Strategy | Non-linear iRT calibration |

- Identification:

| Parameter        | Value                         |
|------------------|-------------------------------|
| Pvalue Estimator | Normal distribution estimator |
| Qvalue Cutoff    | 0.01                          |

- Quantitation:

| Parameter               | Value   |
|-------------------------|---------|
| Interference Correction | checked |
| Cross Run Normalization | checked |

- Workflow:

| Parameter                     | Value                        |
|-------------------------------|------------------------------|
| Profiling Strategy            | iRT Profiling                |
| Profiling Row Selection       | Minimum Qvalue Row Selection |
| Qvalue Threshold              | 0.01                         |
| Profiling Target Selection    | Automatic Selection          |
| Default Labeling Type Assumed | LABEL                        |

- Protein Inference:

| Parameter                  | Value     |
|----------------------------|-----------|
| Protein Inference Workflow | Automatic |

- Post Analysis:

| Parameter                       | Value                                |
|---------------------------------|--------------------------------------|
| Differential Abundance Testing  | Student's t-test                     |
| Quantity                        | MS2 peak area                        |
| Data Filtering                  | Qvalue                               |
| Differential Abundance Grouping | By protein group                     |
| Smallest Quantitative Unit      | Precursor ion (summed fragment ions) |
| Include MS1                     | checked                              |

- Reporting:

If you have already loaded the SWATHbenchmark schema, tick it at the *Pipeline Report Schema*. Otherwise, you can load it after analysis at the *Report* tab.

| Parameter               | Value      |
|-------------------------|------------|
| Pipeline Reporting Unit | Experiment |



| Parameter          | Value   |
|--------------------|---------|
| Scoring Histograms | checked |
| Generate SNE File  | checked |

## Report results

- Select the *Report* tab.
  - If you didn't load yet the SWATHbenchmark report schema, you may do it here at the Schemas section:
    - \* Press the *Import Schema* button at the bottom of the *Schemas* section.
    - \* Browse for the SWATHbenchmark report schema, and load it.
  - Select the SWATHbenchmark report schema at the *Schemas* section (in *Normal Report* subsection).
  - Press the button *Export Report...* at the bottom left.
    - \* Choose a name for the report, and save it.

## 5. DIA-Umpire

This document describes the steps to analyze a dataset of DIA files with the DIA-Umpire pipeline. We show the pipeline using a dataset with 6 files. In this example, injection files are generically named: injection\_001, injection\_002, . . . , injection\_006, and the database: mydatabase.fasta. Detailed information about the parameters for each of the used tools in the pipelines may be found on their respective websites.

### 5.1 Convert WIFF raw files

#### Convert WIFF raw files into mzXML format (centroid spectra)

- use the peakpicking option in msconvert to generate centroid spectra

```
msconvert.exe --mzXML --filter "peakPicking true 1-2" ~/workdir/injection_001.wiff
msconvert.exe --mzXML --filter "peakPicking true 1-2" ~/workdir/injection_002.wiff
msconvert.exe --mzXML --filter "peakPicking true 1-2" ~/workdir/injection_003.wiff
msconvert.exe --mzXML --filter "peakPicking true 1-2" ~/workdir/injection_004.wiff
msconvert.exe --mzXML --filter "peakPicking true 1-2" ~/workdir/injection_005.wiff
msconvert.exe --mzXML --filter "peakPicking true 1-2" ~/workdir/injection_006.wiff
```

#### Run DIA-Umpire Signal Extraction (SE) for each mzXML file to generate pseudo MS/MS spectra (MGF format)

```
java -jar -Xmx15G ~/DIA-Umpire/DIA_Umpire_SE.jar \
~/workdir/injection_001.mzXML ~/workdir/diaumpire_se.params
```

(execute the same command for the other 5 injections too)

#### Convert the resulting MGF files into mzXML format using msconvert.exe

```
msconvert.exe --mzXML ~/workdir/injection_001_Q1.mgf
msconvert.exe --mzXML ~/workdir/injection_001_Q2.mgf
msconvert.exe --mzXML ~/workdir/injection_001_Q3.mgf
```

(execute the same commands for the other 5 injections too)

### 5.2 Database searches

#### X! Tandem MS/MS database search

To run X! Tandem for each pseudo MS/MS spectra file, you will need to have an X! Tandem parameter file for each pseudo MS/MS mzXML file. The definitions of most of X! Tandem parameters are available at <http://www.thegpm.org/TANDEM/api/index.html>. For each pseudo MS/MS mzXML file, an X! Tandem parameter file is generated and the input spectrum files and output tandem output files are specified in the parameter file.

#### Run X! Tandem for each mzXML file

```
tandem ~/workdir/tandem_param_injection_001_Q1.xml
tandem ~/workdir/tandem_param_injection_001_Q2.xml
tandem ~/workdir/tandem_param_injection_001_Q3.xml
```

(execute the same commands for the other 5 injections too)

### Convert tandem output files to pepXML files using Tandem2XML

```
tandem2XML ~/workdir/injection_001_Q1.tandem ~/workdir/injection_001_Q1.tandem.pep.xml
tandem2XML ~/workdir/injection_001_Q2.tandem ~/workdir/injection_001_Q2.tandem.pep.xml
tandem2XML ~/workdir/injection_001_Q3.tandem ~/workdir/injection_001_Q3.tandem.pep.xml
```

(execute the same commands for the other 5 injections too)

### Execute xinteract (from TPP package) on each X! Tandem pepXML file

```
xinteract -OpdEAP -PPM -p0.1 -dreverse -Ninteract-injection_001_Q1.tandem.pep.xml \
~/workdir/injection_001_Q1.tandem.pep.xml
xinteract -OpdEAP -PPM -p0.1 -dreverse -Ninteract-injection_001_Q2.tandem.pep.xml \
~/workdir/injection_001_Q2.tandem.pep.xml
xinteract -OpdEAP -PPM -p0.1 -dreverse -Ninteract-injection_001_Q3.tandem.pep.xml \
~/workdir/injection_001_Q3.tandem.pep.xml
```

(execute the same commands for the other 5 injections too)

### Comet MS/MS database search

To run Comet, you will need to have an Comet parameter file. The definitions Comet parameters are available at [http://comet-ms.sourceforge.net/parameters/parameters\\_201601/](http://comet-ms.sourceforge.net/parameters/parameters_201601/)

```
comet.2015025.linux.exe -Pcomet.params -N~/workdir/injection_001_Q1.comet \
~/workdir/injection_001_Q1.mzXML
comet.2015025.linux.exe -Pcomet.params -N~/workdir/injection_001_Q2.comet \
~/workdir/injection_001_Q2.mzXML
comet.2015025.linux.exe -Pcomet.params -N~/workdir/injection_001_Q3.comet \
~/workdir/injection_001_Q3.mzXML
```

(execute the same commands for the other 5 injections too)

### Execute xinteract (from TPP package) for each Comet pepXML file:

```
xinteract -OpdAP -PPM -p0.1 -dreverse -Ninteract-injection_001_Q1.comet.pep.xml \
~/workdir/injection_001_Q1.comet.pep.xml
xinteract -OpdAP -PPM -p0.1 -dreverse -Ninteract-injection_001_Q2.comet.pep.xml \
~/workdir/injection_001_Q2.comet.pep.xml
xinteract -OpdAP -PPM -p0.1 -dreverse -Ninteract-injection_001_Q3.comet.pep.xml \
~/workdir/injection_001_Q3.comet.pep.xml
```

(execute the same commands for the other 5 injections too)

### MS-GF+ search engine

The format of command for MS-GF+ search engine can be found at <https://omics.pnl.gov/software/ms-gf>

### Run MS-GF+

```
java -Xmx3500m \
-jar ~/MSGFPlus.20140716/MSGFPlus.jar \
-s ~/workdir/injection_001_Q1.mzXML \
-d ~/mydatabase.fasta \
-o ~/workdir/injection_001_Q1.msgf.mzid
```

```

\t 30ppm \
-thread 1 \
-tda 0 \
-m 0 \
-ti 0,0 \
-inst 2 \
-e 1 \
-mod ~/msgf.mod
java -Xmx3500m \
-jar ~/MSGFPlus.20140716/MSGFPlus.jar \
-s ~/workdir/injection_001_Q2.mzXML \
-d ~/mydatabase.fasta \
-o ~/workdir/injection_001_Q2.msgf.mzid \
-t 30ppm \
-thread 1 \
-tda 0 \
-m 0 \
-ti 0,0 \
-inst 2 \
-e 1 \
-mod ~/msgf.mod
java -Xmx3500m \
-jar ~/MSGFPlus.20140716/MSGFPlus.jar \
-s ~/workdir/injection_001_Q3.mzXML \
-d ~/mydatabase.fasta \
-o ~/workdir/injection_001_Q3.msgf.mzid \
-t 30ppm \
-thread 1 \
-tda 0 \
-m 0 \
-ti 0,0 \
-inst 2 \
-e 1 \
-mod ~/msgf.mod

```

(execute the same commands for the other 5 injections too)

### Convert mzid files to pepXML using idconvert.exe

```

idconvert ~/workdir/injection_001_Q1.msgf.mzid --pepXML
idconvert ~/workdir/injection_001_Q2.msgf.mzid --pepXML
idconvert ~/workdir/injection_001_Q3.msgf.mzid --pepXML

```

(execute the same commands for the other 5 injections too)

### Execute xinteract (from TPP package) for each MS-GF+ pepXML file:

```

xinteract -OpdEAP -PPM -p0.1 -dreverse -Ninteract-injection_001_Q1.msgf.pep.xml \
~/workdir/injection_001_Q1.pepXML
xinteract -OpdEAP -PPM -p0.1 -dreverse -Ninteract-injection_001_Q2.msgf.pep.xml \
~/workdir/injection_001_Q2.pepXML
xinteract -OpdEAP -PPM -p0.1 -dreverse -Ninteract-injection_001_Q3.msgf.pep.xml \
~/workdir/injection_001_Q3.pepXML

```

(execute the same commands for the other 5 injections too)

## 5.3 Perform iProphet analysis to combine the results of the three search engines

```

InterProphetParser NONSP ~/workdir/interact-injection_001_Q1.tandem.pep.xml \
~/workdir/interact-injection_001_Q1.comet.pep.xml \
~/workdir/interact-injection_001_Q1.msgf.pep.xml \
~/workdir/interact-injection_001_Q1.iproph.pep.xml
InterProphetParser NONSP ~/workdir/interact-injection_001_Q2.tandem.pep.xml \
~/workdir/interact-injection_001_Q2.comet.pep.xml \
~/workdir/interact-injection_001_Q2.msgf.pep.xml \
~/workdir/interact-injection_001_Q2.iproph.pep.xml

```

```
InterProphetParser NONSP ~/workdir/interact-injection_001_Q3.tandem.pep.xml \  
~/workdir/interact-injection_001_Q3.comet.pep.xml \  
~/workdir/interact-injection_001_Q3.msgf.pep.xml \  
~/workdir/interact-injection_001_Q3.iproph.pep.xml
```

(execute the same commands for the other 5 injections too)

## 5.4 Perform ProteinProphet analysis

```
ProteinProphet IPROPHET MINPROB0.5 ~/workdir/*.iproph.pep.xml \  
~/workdir/interact.iproph.prot.xml
```

## 5.5 Perform DIA-Umpire quantification

```
java -jar --Xmx20G ~/DIA-Umpire/DIA_Umpire_Quant.jar \  
~/workdir/diaumpire_quant.params
```
